# Supplementary material for: Computational design of a mixed A-site cation halide solid electrolyte for all-solid-state lithium batteries
Source: Royal Society of Chemistry journal article supplement (doi:10.1039/d3ta01787g), 2023-01-01
Supplement: d3ta01787g1.pdf [file d3ta01787g1.pdf]

## Supplementary information

# Computational Design of A-Cation Halide Solid Electrolyte for All-Solid-State Lithium Batteries

Bui Thi Tham,<sup>a</sup> Min-Sik Park,<sup>\*b</sup> Jung Ho Kim,<sup>\*c</sup> and Janghyuk Moon<sup>\*a</sup>

<sup>a</sup> *Department of Energy Systems Engineering, Chung-Ang University, Heukseok-Ro, Dongjak-Gu, Seoul 06974, Republic of Korea.*

<sup>b</sup> *Department of Advanced Materials Engineering for Information and Electronics, Integrated Education Institute for Frontier Science & Technology (BK21 Four), Kyung Hee University, 1732 Deogyong-daero, Giheung-gu, Yongin 17104, Republic of Korea*

<sup>c</sup> *Institute for Superconducting & Electronic Materials (ISEM), Australian Institute of Innovative Materials (AIIM), University of Wollongong, Innovation Campus, Squires Way, North Wollongong, NSW 2500, Australia*

\*Corresponding authors: M.-S. Park (mspark@khu.ac.kr), J.H. Kim (jhk@uow.edu.au), J. Moon (jhmoob84@cau.ac.kr)

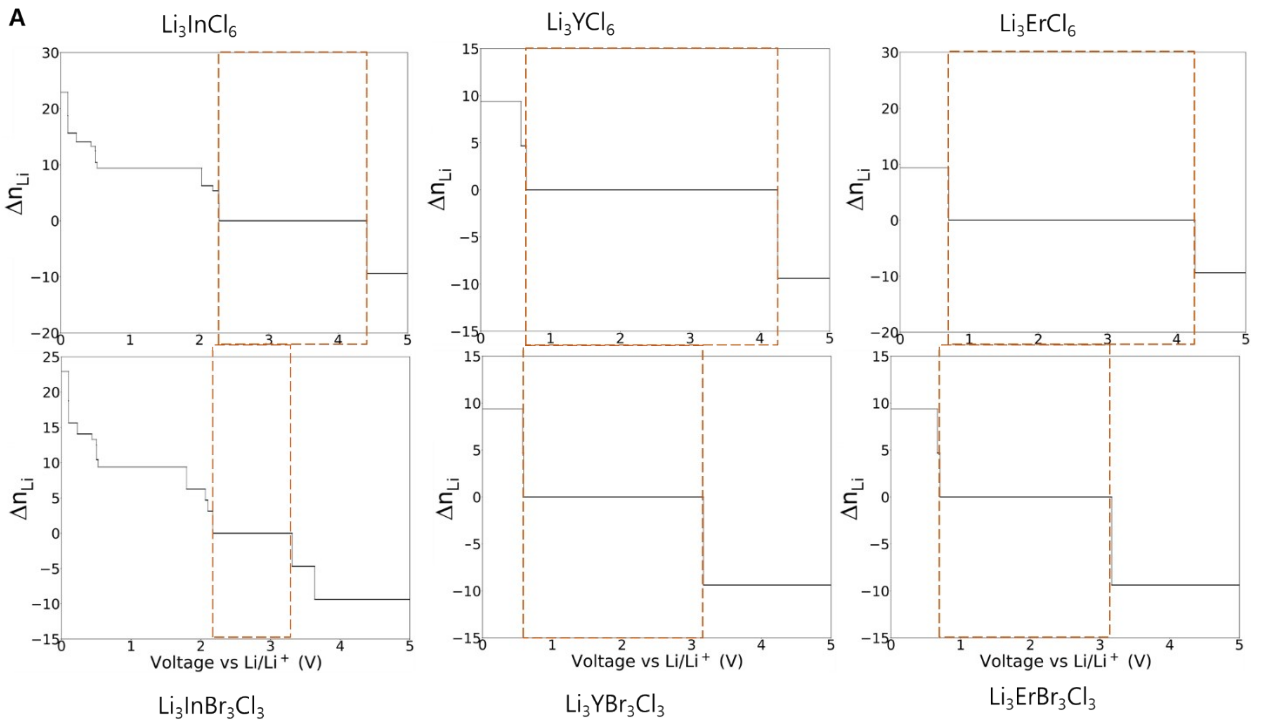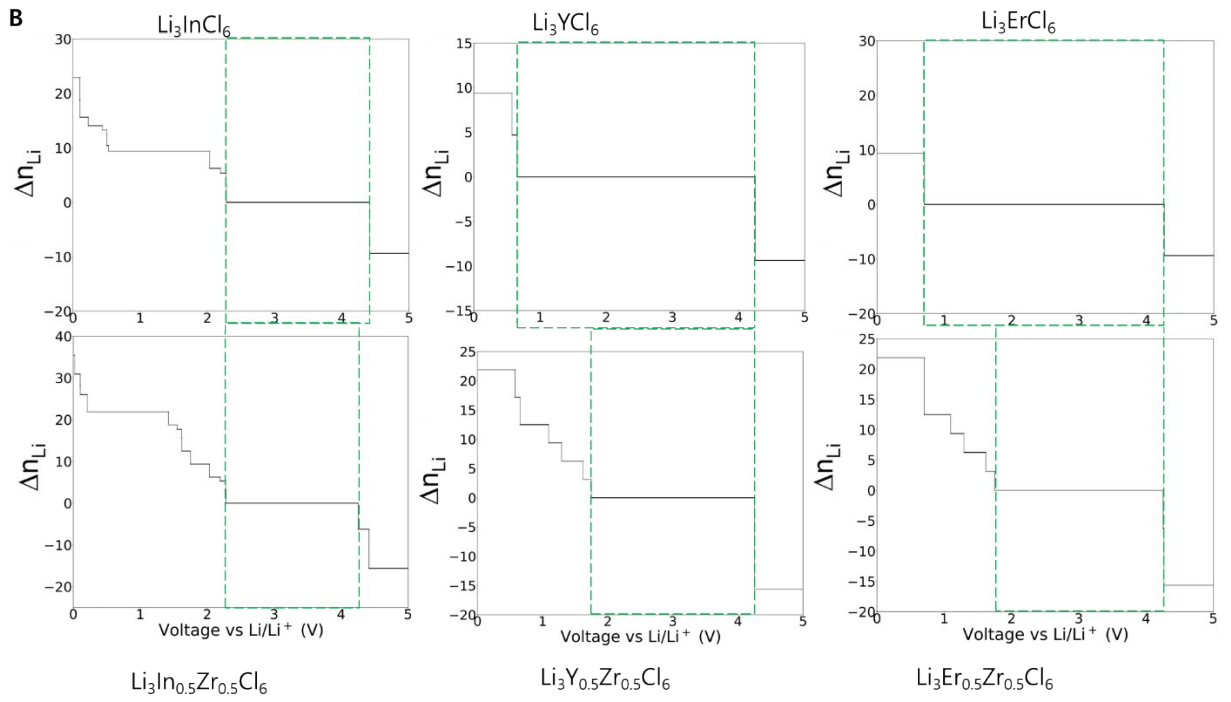

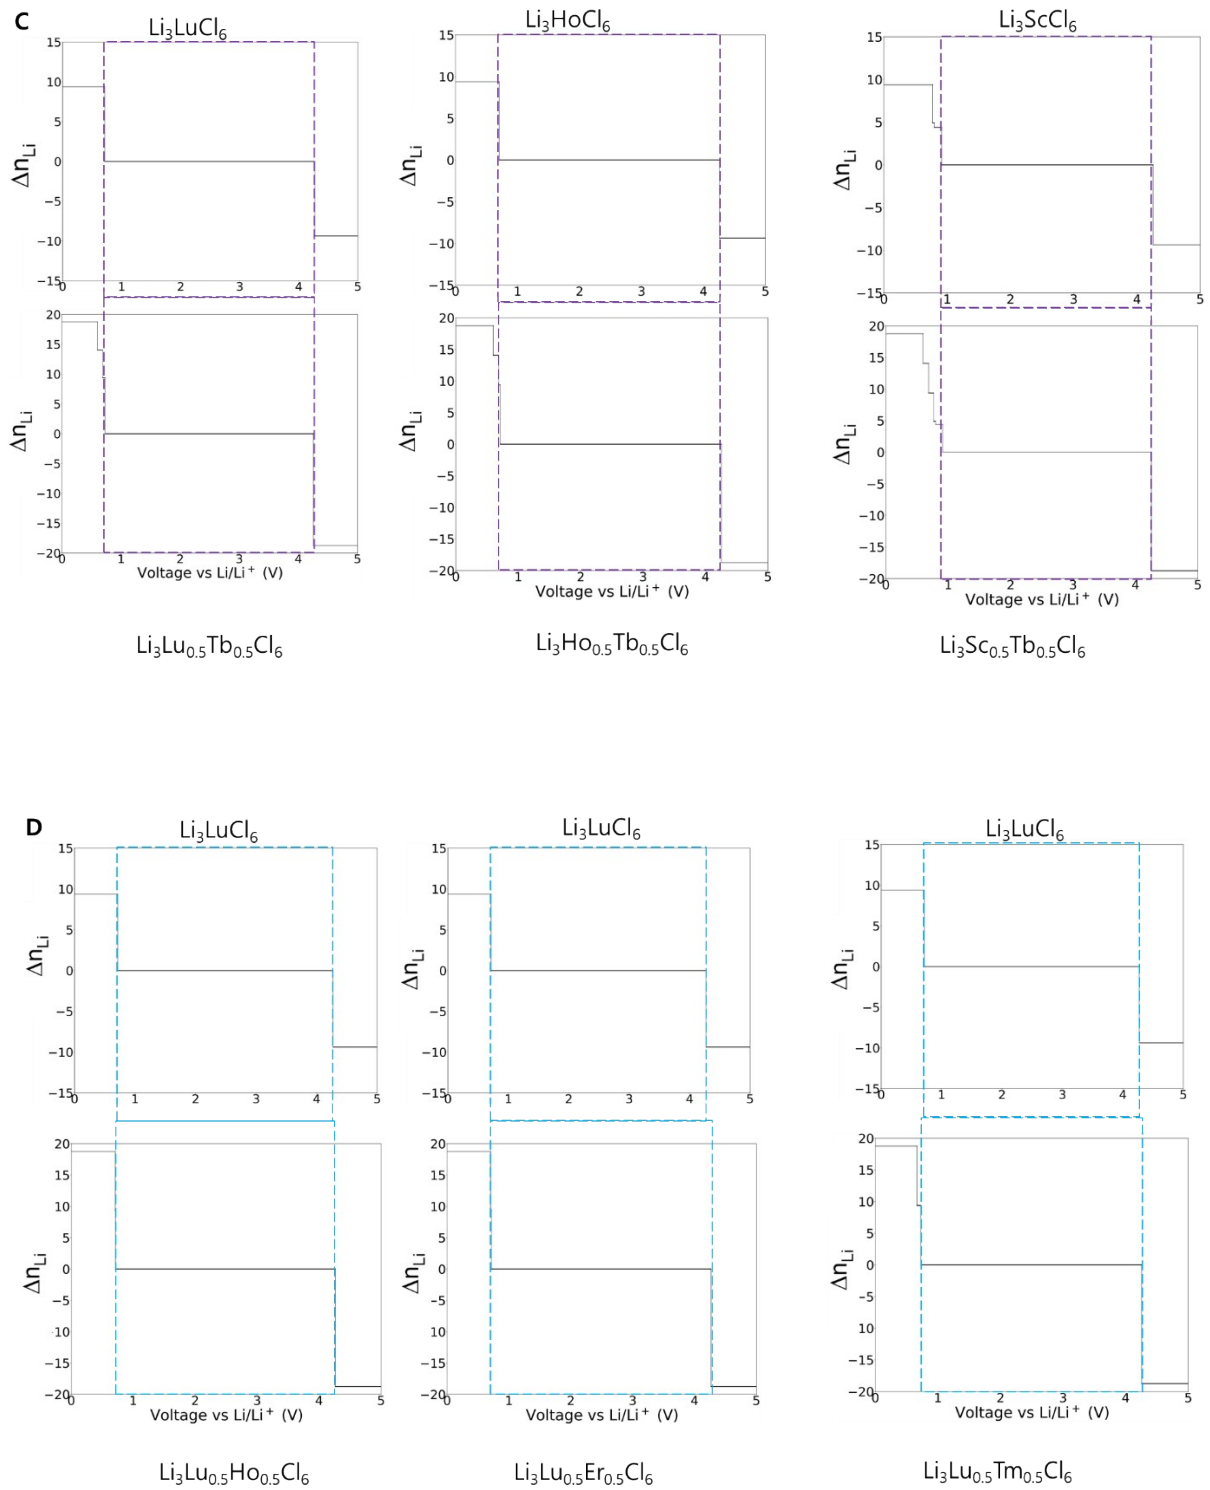

**Fig. S1** The electrochemical reaction decomposition of  $\text{Li}_3\text{MCl}_6$  ( $\text{M} = \text{In}, \text{Sc}, \text{Er}, \text{Y}$ ) with (A)  $\text{Li}_3\text{MBr}_3\text{Cl}_3$ , (B)  $\text{Li}_3\text{M}_{0.5}\text{Zr}_{0.5}\text{Cl}_6$  (C and D)  $\text{Li}_3\text{M}_{0.5}\text{M}'_{0.5}\text{Cl}_6$  as a function of the chemical potential of Li.

**Table S1.** Phase stability (energy above the convex hull,  $E_{hull}$ ) of  $\text{Li}_3\text{MX}_6$ ,  $\text{Li}_3\text{M}_{0.5}\text{Zr}_{0.5}\text{Cl}_6$  and  $\text{Li}_3\text{MBr}_3\text{Cl}_3$ .

| <b>M</b> | <b>Ehull (meV/atom)</b>   |                           |                          |                                                           |                                      |
|----------|---------------------------|---------------------------|--------------------------|-----------------------------------------------------------|--------------------------------------|
|          | $\text{Li}_3\text{MCl}_6$ | $\text{Li}_3\text{MBr}_6$ | $\text{Li}_3\text{MI}_6$ | $\text{Li}_{2.5}\text{M}_{0.5}\text{Zr}_{0.5}\text{Cl}_6$ | $\text{Li}_3\text{MBr}_3\text{Cl}_3$ |
| In       | 0                         | 20                        | 29                       | 145                                                       | 85                                   |
| Bi       | 3                         | 22                        | 31                       | 96                                                        | 72                                   |
| Sc       | 10                        | 0                         | 0                        | 18                                                        | 141                                  |
| Lu       | 0                         | 0                         | 0                        | 60                                                        | 11                                   |
| Tm       | 4                         | 0                         | 0                        | 300                                                       | 15                                   |
| Er       | 0                         | 2                         | 0                        | 339                                                       | 15                                   |
| Y        | 19                        | 18                        | 30                       | 46                                                        | 35                                   |
| Ho       | 0                         | 0                         | 3                        | 165                                                       | 14                                   |
| Dy       | 14                        | 2                         | 5                        | 140                                                       | 22                                   |
| Tb       | 19                        | 3                         | 8                        | 58                                                        | 26                                   |
| Sm       | 4                         | 27                        | 17                       | 88                                                        | 43                                   |

**Table S2.** Phase stability (energy above the convex hull,  $E_{hull}$ ) of  $\text{Li}_3\text{M}_{0.5}\text{M}'_{0.5}\text{Cl}_6$ .

|           |                                                       | <b>Ehull (meV/atom)</b> |    |    |    |    |    |    |    |    |    |    |
|-----------|-------------------------------------------------------|-------------------------|----|----|----|----|----|----|----|----|----|----|
|           |                                                       | <b>M</b>                |    |    |    |    |    |    |    |    |    |    |
| <b>M'</b> | $\text{Li}_3\text{M}_{0.5}\text{M}'_{0.5}\text{Cl}_6$ | In                      | Bi | Sc | Lu | Tm | Er | Y  | Ho | Dy | Tb | Sm |
|           |                                                       | In                      | 0  | 29 | 41 | 22 | 27 | 25 | 35 | 24 | 33 | 35 |
|           | Bi                                                    | 29                      | 3  | 14 | 1  | 5  | 4  | 12 | 2  | 9  | 12 | 4  |
|           | Sc                                                    | 41                      | 14 | 10 | 6  | 11 | 11 | 21 | 11 | 19 | 22 | 18 |
|           | Lu                                                    | 22                      | 1  | 6  | 0  | 0  | 0  | 8  | 0  | 5  | 7  | 1  |
|           | Tm                                                    | 27                      | 5  | 11 | 0  | 4  | 3  | 12 | 1  | 10 | 13 | 5  |
|           | Er                                                    | 25                      | 4  | 11 | 0  | 3  | 0  | 10 | 0  | 7  | 10 | 4  |
|           | Y                                                     | 35                      | 12 | 21 | 8  | 12 | 10 | 19 | 9  | 17 | 19 | 12 |
|           | Ho                                                    | 24                      | 2  | 11 | 0  | 1  | 0  | 9  | 0  | 6  | 9  | 2  |
|           | Dy                                                    | 33                      | 9  | 19 | 5  | 10 | 7  | 17 | 6  | 14 | 17 | 9  |
|           | Tb                                                    | 35                      | 12 | 22 | 7  | 13 | 10 | 19 | 9  | 17 | 19 | 12 |
|           | Sm                                                    | 28                      | 4  | 18 | 1  | 5  | 4  | 12 | 2  | 9  | 12 | 4  |

**Table S3.** Reduction and oxidation potentials of the  $\text{Li}_3\text{MX}_6$  or  $\text{Li}_3\text{M}_{0.5}\text{Zr}_{0.5}\text{Cl}_6$  and  $\text{Li}_3\text{MBr}_3\text{Cl}_3$  solid electrolytes and corresponding phase equilibria.

| Solid electrolyte                                         |                                                  | Reduction potential (V) | Phase equilibria at the reduction potential                                           | Oxidation potential (V)         | Phase equilibria at the oxidation potential                                                     |
|-----------------------------------------------------------|--------------------------------------------------|-------------------------|---------------------------------------------------------------------------------------|---------------------------------|-------------------------------------------------------------------------------------------------|
| Sulfides                                                  | $\text{Li}_3\text{PS}_4$                         | 1.707                   | $\text{Li}_2\text{S}$ , P                                                             | 2.3688                          | $\text{P}_2\text{S}_7$ , $\text{LiS}_4$ , Li                                                    |
|                                                           | $\text{Li}_{10}\text{GeP}_2\text{S}_{12}$        | 1.707                   | $\text{Li}_4\text{GeS}_4$ , $\text{Li}_2\text{S}$ , P                                 | 2.2875                          | $\text{Li}_3\text{PS}_4$ , $\text{GeS}_2$ , $\text{LiS}_4$                                      |
|                                                           | $\text{Li}_6\text{PS}_5\text{Cl}$                | 1.707                   | LiCl, $\text{Li}_2\text{S}$ , P                                                       | 2.129                           | $\text{Li}_3\text{PS}_4$ , $\text{LiS}_4$ , LiCl                                                |
| Oxide                                                     | $\text{Li}_7\text{La}_3\text{Zr}_2\text{O}_{12}$ | 0.02684                 | $\text{Zr}_4\text{O}$ , $\text{Li}_2\text{O}$ , $\text{La}_2\text{O}_3$               | 3.1494                          | 1.75 $\text{Li}_2\text{O}_2$ , $\text{La}_2\text{Zr}_2\text{O}_7$ , 0.5 $\text{La}_2\text{O}_3$ |
|                                                           | $\text{LiGaO}_2$                                 | 1.1154                  | $\text{Li}_5\text{GaO}_4$ , Ga                                                        | 3.7982                          | $\text{LiGa}_5\text{O}_8$ , $\text{O}_2$                                                        |
|                                                           | $\text{Li}_2\text{La}_2\text{Ti}_3\text{O}_{10}$ | 1.14613                 | 0.5 $\text{LiTi}_2\text{O}_4$ , $\text{La}_2\text{TiO}_5$ , $\text{Li}_2\text{TiO}_3$ | 3.6647                          | $\text{Li}_4\text{Ti}_5\text{O}_{12}$ , $\text{LiO}_8$ , $\text{La}_2\text{Ti}_2\text{O}_7$     |
| $\text{Li}_3\text{MCl}_6$                                 | In                                               | 2.2824                  | $\text{InCl}_2$ , LiCl                                                                | 4.4169                          | $\text{InCl}_3$ , $\text{Cl}_2$                                                                 |
|                                                           | Bi                                               | 2.4167                  | Bi, LiCl                                                                              | 4.2545                          | $\text{BiCl}_3$ , $\text{Cl}_2$                                                                 |
|                                                           | Sc                                               | 0.9104                  | $\text{Sc}_5\text{Cl}_8$ , LiCl                                                       | 4.2545                          | $\text{ScCl}_3$ , $\text{Cl}_2$                                                                 |
|                                                           | Lu                                               | 0.7301                  | Lu, LiCl                                                                              | 4.2545                          | $\text{LuCl}_3$ , $\text{Cl}_2$                                                                 |
|                                                           | Tm                                               | 0.6658                  | Tm, LiCl                                                                              | 4.2545                          | $\text{TmCl}_3$ , $\text{Cl}_2$                                                                 |
|                                                           | Er                                               | 0.7031                  | Er, LiCl                                                                              | 4.2665                          | $\text{ErCl}_3$ , $\text{Cl}_2$                                                                 |
|                                                           | Y                                                | 0.6528                  | $\text{Y}_2\text{Cl}_3$ , LiCl                                                        | 4.2545                          | $\text{YCl}_3$ , $\text{Cl}_2$                                                                  |
|                                                           | Ho                                               | 0.7103                  | Ho, LiCl                                                                              | 4.2545                          | $\text{HoCl}_3$ , $\text{Cl}_2$                                                                 |
|                                                           | Dy                                               | 0.6568                  | Dy, LiCl                                                                              | 4.2545                          | $\text{DyCl}_3$ , $\text{Cl}_2$                                                                 |
|                                                           | Tb                                               | 0.68536                 | $\text{Tb}_2\text{Cl}_3$ , LiCl                                                       | 4.2545                          | $\text{TbCl}_3$ , $\text{Cl}_2$                                                                 |
| Sm                                                        | 0.7265                                           | Sm, LiCl                | 4.2545                                                                                | $\text{SmCl}_3$ , $\text{Cl}_2$ |                                                                                                 |
| $\text{Li}_{2.5}\text{M}_{0.5}\text{Zr}_{0.5}\text{Cl}_6$ | $\text{Li}_2\text{ZrCl}_6$                       | 1.75007                 | $\text{ZrCl}_3$ , LiCl                                                                | 4.2545                          | $\text{ZrCl}_4$ , $\text{Cl}_2$                                                                 |
|                                                           | In                                               | 2.2824                  | $\text{InCl}_2$ , $\text{ZrCl}_4$ , LiCl                                              | 4.2545                          | $\text{Li}_3\text{InCl}_6$ , $\text{ZrCl}_4$ , $\text{Cl}_2$                                    |
|                                                           | Sc                                               | 1.75007                 | $\text{ZrCl}_3$ , $\text{ScCl}_3$ , LiCl                                              | 4.2545                          | $\text{ScCl}_3$ , $\text{ZrCl}_4$ , $\text{Cl}_2$                                               |
|                                                           | Y                                                | 1.75007                 | $\text{ZrCl}_3$ , $\text{YCl}_3$ , LiCl                                               | 4.2545                          | $\text{ZrCl}_4$ , $\text{YCl}_3$ , $\text{Cl}_2$                                                |
|                                                           | Er                                               | 1.75007                 | $\text{ZrCl}_3$ , $\text{Li}_3\text{ErCl}_6$ , LiCl                                   | 4.2545                          | $\text{Li}_3\text{ErCl}_6$ , $\text{ZrCl}_4$ , $\text{Cl}_2$                                    |
| $\text{Li}_3\text{MBr}_3\text{Cl}_3$                      | In                                               | 2.1728                  | $\text{InBr}_2$ , LiBr, LiCl                                                          | 3.3099                          | $\text{Li}_3\text{InCl}_6$ , $\text{InBr}_3$ , Br                                               |
|                                                           | Lu                                               | 0.7185                  | LiCl, LiBr, Lu                                                                        | 3.1494                          | $\text{LuCl}_3$ , Br                                                                            |
|                                                           | Tm                                               | 0.6661                  | LiCl, LiBr, Tm                                                                        | 3.1378                          | $\text{TmCl}_3$ , Br                                                                            |
|                                                           | Er                                               | 0.7031                  | LiCl, $\text{Li}_3\text{ErBr}_6$ , Er                                                 | 3.1683                          | $\text{ErCl}_3$ , Br                                                                            |
|                                                           | Y                                                | 0.5901                  | $\text{Y}_2\text{Cl}_3$ , LiCl, LiBr                                                  | 3.1692                          | $\text{YCl}_3$ , Br                                                                             |
|                                                           | Ho                                               | 0.6844                  | LiCl, LiBr, Ho                                                                        | 3.1638                          | $\text{HoCl}_3$ , Br                                                                            |
|                                                           | Dy                                               | 0.6568                  | 3 LiCl, LiBr, Dy                                                                      | 3.1378                          | $\text{DyCl}_3$ , Br                                                                            |

|                                  |    |         |                                                 |        |                          |
|----------------------------------|----|---------|-------------------------------------------------|--------|--------------------------|
|                                  | Tb | 0.6853  | Tb <sub>2</sub> Cl <sub>3</sub> , LiCl,<br>LiBr | 3.1378 | TbCl <sub>3</sub> , Br   |
| Li <sub>3</sub> MBr <sub>6</sub> | In | 2.1728  | InBr <sub>2</sub> , LiBr                        | 3.1377 | InBr <sub>3</sub> , Br   |
|                                  | Bi | 2.10759 | Bi, LiBr                                        | 3.1377 | BiBr <sub>3</sub> , Br   |
|                                  | Sc | 0.8921  | Sc, LiBr                                        | 3.1589 | ScBr <sub>3</sub> , Br   |
|                                  | Lu | 0.6968  | Lu, LiBr                                        | 3.1597 | LuBr <sub>3</sub> , Br   |
|                                  | Tm | 0.6624  | Tm, LiBr                                        | 3.1713 | TmBr <sub>3</sub> , Br   |
|                                  | Er | 0.6657  | Er, LiBr                                        | 3.2151 | Br, Er                   |
|                                  | Ho | 0.6769  | Ho, LiBr                                        | 3.145  | HoBr <sub>3</sub> , Br   |
|                                  | Dy | 0.6674  | Dy, LiBr                                        | 3.1377 | DyBr <sub>3</sub> , Br   |
|                                  | Tb | 0.6663  | Tb, LiBr                                        | 3.1377 | TbBr <sub>3</sub> , Br   |
| Li <sub>3</sub> MI <sub>6</sub>  | In | 1.9807  | InI <sub>2</sub> , LiI                          | 2.4656 | LiInI <sub>4</sub> , 2 I |
|                                  | Bi | 1.8216  | Bi, LiI                                         | 2.4656 | BiI <sub>3</sub> , 3 I   |
|                                  | Sc | 1.1112  | Sc <sub>12</sub> I <sub>25</sub> , LiI          | 2.4656 | ScI <sub>3</sub> , I     |
|                                  | Lu | 0.7206  | Lu, LiI                                         | 2.4656 | LuI <sub>3</sub> , I     |
|                                  | Tm | 0.6822  | Tm, LiI                                         | 2.4656 | TmI <sub>3</sub> , I     |
|                                  | Y  | 0.549   | Y, LiI                                          | 2.4656 | YI <sub>3</sub> , I      |
|                                  | Er | 0.6746  | Er, 6 LiI                                       | 2.4656 | ErI <sub>3</sub> , I     |
|                                  | Ho | 0.6511  | Ho, LiI                                         | 2.4656 | HoI <sub>3</sub> , I     |
|                                  | Dy | 0.6384  | Dy, LiI                                         | 2.4656 | DyI <sub>3</sub> , I     |
|                                  | Tb | 0.6283  | Tb, LiI                                         | 2.4656 | TbI <sub>3</sub> , I     |
|                                  | Sm | 0.6048  | Sm, LiI                                         | 2.4656 | SmI <sub>3</sub> , I     |

**Table S4.** Reduction and oxidation potentials of the  $\text{Li}_3\text{M}_{0.5}\text{M}'_{0.5}\text{Cl}_6$  solid electrolytes and corresponding phase equilibria.

| Solid electrolyte                                      | Reduction potential (V) | Phase equilibria at the reduction potential                     | Oxidation potential (V) | Phase equilibria at the oxidation potential            |
|--------------------------------------------------------|-------------------------|-----------------------------------------------------------------|-------------------------|--------------------------------------------------------|
| $\text{Li}_3\text{In}_{0.5}\text{Lu}_{0.5}\text{Cl}_6$ | 2.2824                  | $\text{Li}_3\text{InCl}_6, \text{LuCl}_3, \text{LiCl}$          | 4.2545                  | $\text{Li}_3\text{InCl}_6, \text{LuCl}_3, \text{Cl}_2$ |
| $\text{Li}_3\text{In}_{0.5}\text{Tm}_{0.5}\text{Cl}_6$ | 2.2824                  | $\text{InCl}_2, \text{LiCl}, \text{TmCl}_3$                     | 4.2545                  | $\text{Li}_3\text{InCl}_6, \text{TmCl}_3, \text{Cl}_2$ |
| $\text{Li}_3\text{In}_{0.5}\text{Er}_{0.5}\text{Cl}_6$ | 2.2824                  | $\text{Li}_3\text{ErCl}_6, \text{InCl}_2, \text{LiCl}$          | 4.2665                  | $\text{Li}_3\text{InCl}_6, \text{ErCl}_3, \text{Cl}_2$ |
| $\text{Li}_3\text{In}_{0.5}\text{Ho}_{0.5}\text{Cl}_6$ | 2.2824                  | $\text{InCl}_2, \text{HoCl}_3, \text{LiCl}$                     | 4.2545                  | $\text{Li}_3\text{InCl}_6, \text{HoCl}_3, \text{Cl}_2$ |
| $\text{Li}_3\text{Bi}_{0.5}\text{Sc}_{0.5}\text{Cl}_6$ | 2.4179                  | $\text{ScCl}_3, \text{LiCl}, \text{Bi}$                         | 4.2545                  | $\text{ScCl}_3, \text{Cl}_2, \text{BiCl}_3$            |
| $\text{Li}_3\text{Bi}_{0.5}\text{Lu}_{0.5}\text{Cl}_6$ | 2.4179                  | $\text{LiCl}, \text{LuCl}_3, \text{Bi}$                         | 4.2545                  | $\text{LuCl}_3, \text{Cl}_2, \text{BiCl}_3$            |
| $\text{Li}_3\text{Bi}_{0.5}\text{Tm}_{0.5}\text{Cl}_6$ | 2.4179                  | $\text{LiCl}, \text{TmCl}_3, \text{BiCl}_3$                     | 4.2545                  | $\text{TmCl}_3, \text{Cl}_2, \text{BiCl}_3$            |
| $\text{Li}_3\text{Bi}_{0.5}\text{Er}_{0.5}\text{Cl}_6$ | 2.4179                  | $\text{Li}_3\text{ErCl}_6, \text{LiCl}, \text{BiCl}_3$          | 4.2545                  | $\text{Li}_3\text{ErCl}_6, \text{Cl}_2, \text{BiCl}_3$ |
| $\text{Li}_3\text{Bi}_{0.5}\text{Y}_{0.5}\text{Cl}_6$  | 2.4179                  | $\text{LiCl}, \text{YCl}_3, \text{Bi}$                          | 4.2545                  | $\text{YCl}_3, \text{Cl}_2, \text{BiCl}_3$             |
| $\text{Li}_3\text{Bi}_{0.5}\text{Ho}_{0.5}\text{Cl}_6$ | 2.4179                  | $\text{LiCl}, \text{HoCl}_3, \text{Bi}$                         | 4.2545                  | $\text{HoCl}_3, \text{Cl}_2, \text{BiCl}_3$            |
| $\text{Li}_3\text{Bi}_{0.5}\text{Dy}_{0.5}\text{Cl}_6$ | 2.4179                  | $\text{LiCl}, \text{DyCl}_3, \text{Bi}$                         | 4.2545                  | $\text{DyCl}_3, \text{Cl}_2, \text{BiCl}_3$            |
| $\text{Li}_3\text{Bi}_{0.5}\text{Tb}_{0.5}\text{Cl}_6$ | 2.4179                  | $\text{LiCl}, \text{TbCl}_3, \text{Bi}$                         | 4.2545                  | $\text{TbCl}_3, \text{Cl}_2, \text{BiCl}_3$            |
| $\text{Li}_3\text{Bi}_{0.5}\text{Sm}_{0.5}\text{Cl}_6$ | 2.4179                  | $\text{LiCl}, \text{SmCl}_3, \text{Bi}$                         | 4.2545                  | $\text{SmCl}_3, \text{Cl}_2, \text{BiCl}_3$            |
| $\text{Li}_3\text{Sc}_{0.5}\text{Lu}_{0.5}\text{Cl}_6$ | 0.9104                  | $\text{Sc}_5\text{Cl}_8, \text{LuCl}_3, \text{LiCl}$            | 4.2545                  | $\text{ScCl}_3, \text{LuCl}_3, \text{Cl}_2$            |
| $\text{Li}_3\text{Sc}_{0.5}\text{Tm}_{0.5}\text{Cl}_6$ | 0.9104                  | $\text{Sc}_5\text{Cl}_8, \text{TmCl}_3, \text{LiCl}$            | 4.2545                  | $\text{ScCl}_3, \text{TmCl}_3, \text{Cl}_2$            |
| $\text{Li}_3\text{Sc}_{0.5}\text{Er}_{0.5}\text{Cl}_6$ | 0.9104                  | $\text{Sc}_5\text{Cl}_8, \text{Li}_3\text{ErCl}_6, \text{LiCl}$ | 4.2545                  | $\text{Li}_3\text{ErCl}_6, \text{ScCl}_3, \text{Cl}_2$ |
| $\text{Li}_3\text{Sc}_{0.5}\text{Y}_{0.5}\text{Cl}_6$  | 0.9104                  | $0\text{Sc}_5\text{Cl}_8, \text{YCl}_3, \text{LiCl}$            | 4.2545                  | $\text{ScCl}_3, \text{YCl}_3, \text{Cl}_2$             |
| $\text{Li}_3\text{Sc}_{0.5}\text{Ho}_{0.5}\text{Cl}_6$ | 0.9104                  | $0\text{Sc}_5\text{Cl}_8, \text{HoCl}_3, \text{LiCl}$           | 4.2545                  | $\text{ScCl}_3, \text{HoCl}_3, \text{Cl}_2$            |
| $\text{Li}_3\text{Sc}_{0.5}\text{Dy}_{0.5}\text{Cl}_6$ | 0.9104                  | $0\text{Sc}_5\text{Cl}_8, \text{DyCl}_3, \text{LiCl}$           | 4.2545                  | $\text{ScCl}_3, \text{DyCl}_3, \text{Cl}_2$            |
| $\text{Li}_3\text{Sc}_{0.5}\text{Tb}_{0.5}\text{Cl}_6$ | 0.9104                  | $0\text{Sc}_5\text{Cl}_8, \text{TbCl}_3, \text{LiCl}$           | 4.2545                  | $\text{ScCl}_3, \text{TbCl}_3, \text{Cl}_2$            |
| $\text{Li}_3\text{Sc}_{0.5}\text{Sm}_{0.5}\text{Cl}_6$ | 0.9104                  | $0\text{Sc}_5\text{Cl}_8, \text{SmCl}_3, \text{LiCl}$           | 4.2545                  | $\text{ScCl}_3, \text{SmCl}_3, \text{Cl}_2$            |
| $\text{Li}_3\text{Lu}_{0.5}\text{Tm}_{0.5}\text{Cl}_6$ | 0.7275                  | $\text{TmCl}_3, \text{LiCl}, \text{Lu}$                         | 4.2559                  | $\text{TmCl}_3, \text{Cl}_2, \text{LuCl}_3$            |
| $\text{Li}_3\text{Lu}_{0.5}\text{Er}_{0.5}\text{Cl}_6$ | 0.7159                  | $\text{Li}_3\text{ErCl}_6, \text{LiCl}, \text{Lu}$              | 4.2676                  | $\text{Li}_3\text{ErCl}_6, \text{Cl}_2, \text{LuCl}_3$ |
| $\text{Li}_3\text{Lu}_{0.5}\text{Y}_{0.5}\text{Cl}_6$  | 0.7301                  | $\text{YCl}_3, \text{LiCl}, \text{Lu}$                          | 4.2545                  | $\text{YCl}_3, \text{Cl}_2, \text{LuCl}_3$             |
| $\text{Li}_3\text{Lu}_{0.5}\text{Ho}_{0.5}\text{Cl}_6$ | 0.7122                  | $\text{HoCl}_3, \text{LiCl}, \text{Lu}$                         | 4.2635                  | $\text{HoCl}_3, \text{Cl}_2, \text{LuCl}_3$            |
| $\text{Li}_3\text{Lu}_{0.5}\text{Dy}_{0.5}\text{Cl}_6$ | 0.7301                  | $\text{DyCl}_3, \text{LiCl}, \text{Lu}$                         | 4.2545                  | $\text{DyCl}_3, \text{Cl}_2, \text{LuCl}_3$            |
| $\text{Li}_3\text{Lu}_{0.5}\text{Tb}_{0.5}\text{Cl}_6$ | 0.7301                  | $\text{TbCl}_3, \text{LiCl}, \text{Lu}$                         | 4.2545                  | $\text{TbCl}_3, \text{Cl}_2, \text{LuCl}_3$            |
| $\text{Li}_3\text{Lu}_{0.5}\text{Sm}_{0.5}\text{Cl}_6$ | 0.7301                  | $\text{SmCl}_3, \text{LiCl}, \text{Lu}$                         | 4.2545                  | $\text{SmCl}_3, \text{Cl}_2, \text{LuCl}_3$            |
| $\text{Li}_3\text{Tm}_{0.5}\text{Er}_{0.5}\text{Cl}_6$ | 0.7031                  | $\text{TmCl}_3, \text{LiCl}, \text{Er}$                         | 4.2545                  | $\text{Li}_3\text{ErCl}_6, \text{TmCl}_3, \text{Cl}_2$ |
| $\text{Li}_3\text{Tm}_{0.5}\text{Y}_{0.5}\text{Cl}_6$  | 0.66606                 | $\text{YCl}_3, \text{LiCl}, \text{Tm}$                          | 4.2545                  | $\text{TmCl}_3, \text{YCl}_3, \text{Cl}_2$             |
| $\text{Li}_3\text{Tm}_{0.5}\text{Ho}_{0.5}\text{Cl}_6$ | 0.7103                  | $\text{TmCl}_3, \text{LiCl}, \text{Ho}$                         | 4.2545                  | $\text{TmCl}_3, \text{HoCl}_3, \text{Cl}_2$            |
| $\text{Li}_3\text{Tm}_{0.5}\text{Dy}_{0.5}\text{Cl}_6$ | 0.66606                 | $\text{DyCl}_3, \text{LiCl}, \text{Tm}$                         | 4.2545                  | $\text{TmCl}_3, \text{DyCl}_3, \text{Cl}_2$            |
| $\text{Li}_3\text{Tm}_{0.5}\text{Tb}_{0.5}\text{Cl}_6$ | 0.6853                  | $\text{Tb}_2\text{Cl}_3, \text{TmCl}_3, \text{LiCl}$            | 4.2545                  | $\text{TmCl}_3, \text{TbCl}_3, \text{Cl}_2$            |

|                                                        |        |                                                            |        |                                                                         |
|--------------------------------------------------------|--------|------------------------------------------------------------|--------|-------------------------------------------------------------------------|
| $\text{Li}_3\text{Tm}_{0.5}\text{Sm}_{0.5}\text{Cl}_6$ | 0.7268 | TmCl <sub>3</sub> , LiCl, Sm                               | 4.2545 | TmCl <sub>3</sub> , SmCl <sub>3</sub> , Cl <sub>2</sub>                 |
| $\text{Li}_3\text{Er}_{0.5}\text{Y}_{0.5}\text{Cl}_6$  | 0.7031 | YCl <sub>3</sub> , LiCl, Er                                | 4.2545 | Li <sub>3</sub> ErCl <sub>6</sub> , YCl <sub>3</sub> , Cl <sub>2</sub>  |
| $\text{Li}_3\text{Er}_{0.5}\text{Ho}_{0.5}\text{Cl}_6$ | 0.7055 | Li <sub>3</sub> ErCl <sub>6</sub> , LiCl, Ho               | 4.2545 | Li <sub>3</sub> ErCl <sub>6</sub> , HoCl <sub>3</sub> , Cl <sub>2</sub> |
| $\text{Li}_3\text{Er}_{0.5}\text{Dy}_{0.5}\text{Cl}_6$ | 0.7031 | DyCl <sub>3</sub> , LiCl, Er                               | 4.2545 | Li <sub>3</sub> ErCl <sub>6</sub> , DyCl <sub>3</sub> , Cl <sub>2</sub> |
| $\text{Li}_3\text{Er}_{0.5}\text{Tb}_{0.5}\text{Cl}_6$ | 0.7031 | TbCl <sub>3</sub> , LiCl, Er                               | 4.2545 | Li <sub>3</sub> ErCl <sub>6</sub> , TbCl <sub>3</sub> , Cl <sub>2</sub> |
| $\text{Li}_3\text{Er}_{0.5}\text{Sm}_{0.5}\text{Cl}_6$ | 0.7268 | Li <sub>3</sub> ErCl <sub>6</sub> , LiCl, Sm               | 4.2545 | Li <sub>3</sub> ErCl <sub>6</sub> , SmCl <sub>3</sub> , Cl <sub>2</sub> |
| $\text{Li}_3\text{Y}_{0.5}\text{Ho}_{0.5}\text{Cl}_6$  | 0.7103 | YCl <sub>3</sub> , LiCl, Ho                                | 4.2545 | HoCl <sub>3</sub> , YCl <sub>3</sub> , Cl <sub>2</sub>                  |
| $\text{Li}_3\text{Y}_{0.5}\text{Dy}_{0.5}\text{Cl}_6$  | 0.6568 | YCl <sub>3</sub> , LiCl, Dy                                | 4.2545 | YCl <sub>3</sub> , DyCl <sub>3</sub> , Cl <sub>2</sub>                  |
| $\text{Li}_3\text{Y}_{0.5}\text{Tb}_{0.5}\text{Cl}_6$  | 0.6853 | Tb <sub>2</sub> Cl <sub>3</sub> , YCl <sub>3</sub> , LiCl  | 4.2545 | YCl <sub>3</sub> , TbCl <sub>3</sub> , Cl <sub>2</sub>                  |
| $\text{Li}_3\text{Y}_{0.5}\text{Sm}_{0.5}\text{Cl}_6$  | 0.7268 | YCl <sub>3</sub> , LiCl, Sm                                | 4.2545 | YCl <sub>3</sub> , SmCl <sub>3</sub> , Cl <sub>2</sub>                  |
| $\text{Li}_3\text{Ho}_{0.5}\text{Dy}_{0.5}\text{Cl}_6$ | 0.7103 | DyCl <sub>3</sub> , LiCl, Ho                               | 4.2545 | HoCl <sub>3</sub> , DyCl <sub>3</sub> , Cl <sub>2</sub>                 |
| $\text{Li}_3\text{Ho}_{0.5}\text{Tb}_{0.5}\text{Cl}_6$ | 0.7103 | TbCl <sub>3</sub> , LiCl, Ho                               | 4.2545 | HoCl <sub>3</sub> , TbCl <sub>3</sub> , Cl <sub>2</sub>                 |
| $\text{Li}_3\text{Ho}_{0.5}\text{Sm}_{0.5}\text{Cl}_6$ | 0.7268 | HoCl <sub>3</sub> , LiCl, Sm                               | 4.2545 | HoCl <sub>3</sub> , SmCl <sub>3</sub> , Cl <sub>2</sub>                 |
| $\text{Li}_3\text{Dy}_{0.5}\text{Tb}_{0.5}\text{Cl}_6$ | 0.6853 | Tb <sub>2</sub> Cl <sub>3</sub> , DyCl <sub>3</sub> , LiCl | 4.2545 | DyCl <sub>3</sub> , TbCl <sub>3</sub> , Cl <sub>2</sub>                 |
| $\text{Li}_3\text{Dy}_{0.5}\text{Sm}_{0.5}\text{Cl}_6$ | 0.7268 | DyCl <sub>3</sub> , LiCl, Sm                               | 4.2545 | DyCl <sub>3</sub> , SmCl <sub>3</sub> , 3 Cl <sub>2</sub>               |
| $\text{Li}_3\text{Tb}_{0.5}\text{Sm}_{0.5}\text{Cl}_6$ | 0.7268 | TbCl <sub>3</sub> , LiCl, Sm                               | 4.2545 | SmCl <sub>3</sub> , TbCl <sub>3</sub> , Cl <sub>2</sub>                 |

---



**Table S5.** Chemical reactions between solid electrolytes and cathode materials (LiFePO<sub>4</sub> (LFP), LiMn<sub>2</sub>O<sub>4</sub> (LMO), Li(NiMnCo)<sub>1/3</sub>O<sub>2</sub> (NCM), and LiCoO<sub>2</sub> (LCO), NMC532, NMC622, NMC 811.

| Cathode | Solid electrolyte                                                     | Reaction equation                                                                                                                                                                                                                                         | ED<br>(eV/atom)                                                    |
|---------|-----------------------------------------------------------------------|-----------------------------------------------------------------------------------------------------------------------------------------------------------------------------------------------------------------------------------------------------------|--------------------------------------------------------------------|
| LFP     | Li <sub>3</sub> PS <sub>4</sub>                                       | 0.7 LiFePO <sub>4</sub> + 0.3 Li <sub>3</sub> PS <sub>4</sub> → 0.2 FePS + 0.4 Li <sub>4</sub> P <sub>2</sub> O <sub>7</sub> + 0.5 FeS <sub>2</sub>                                                                                                       | 131                                                                |
|         | Li <sub>10</sub> GeP <sub>2</sub> S <sub>12</sub>                     | 0.1463 Li <sub>10</sub> Ge(PS <sub>6</sub> ) <sub>2</sub> + 0.8537 LiFePO <sub>4</sub> → 0.1951 Li <sub>4</sub> P <sub>2</sub> O <sub>7</sub> + 0.2439 FePS + 0.1463 GeS <sub>2</sub> + 0.6098 FeS <sub>2</sub> + 0.5122 Li <sub>3</sub> PO <sub>4</sub>  | 143                                                                |
|         | Li <sub>6</sub> PS <sub>5</sub> Cl                                    | 0.2857 Li <sub>6</sub> PS <sub>5</sub> Cl + 0.7143 LiFePO <sub>4</sub> → 0.1818 FePS + 0.02597 P <sub>4</sub> S <sub>7</sub> + 0.7143 Li <sub>3</sub> PO <sub>4</sub> + 0.5325 FeS <sub>2</sub> + 0.2857 LiCl                                             | 175                                                                |
|         | Li <sub>7</sub> La <sub>3</sub> Zr <sub>2</sub> O <sub>12</sub>       | 0.2222 Li <sub>7</sub> La <sub>3</sub> Zr <sub>2</sub> O <sub>12</sub> + 0.7778 LiFePO <sub>4</sub> → 0.2222 La <sub>2</sub> Zr <sub>2</sub> O <sub>7</sub> + 0.2222 LaFeO <sub>3</sub> + 0.4444 FeO + 0.7778 Li <sub>3</sub> PO <sub>4</sub> + 0.1111 Fe | 88                                                                 |
|         | LiGaO <sub>2</sub>                                                    | 0.6667 LiGaO <sub>2</sub> + 0.3333 LiFePO <sub>4</sub> → 0.3333 Ga <sub>2</sub> FeO <sub>4</sub> + 0.3333 Li <sub>3</sub> PO <sub>4</sub>                                                                                                                 | 6                                                                  |
|         | Li <sub>2</sub> La <sub>2</sub> Ti <sub>3</sub> O <sub>10</sub>       | 0.5 LiFePO <sub>4</sub> + 0.5 Li <sub>2</sub> La <sub>2</sub> Ti <sub>3</sub> O <sub>10</sub> → 0.5 TiFeO <sub>3</sub> + 0.5 La <sub>2</sub> Ti <sub>2</sub> O <sub>7</sub> + 0.5 Li <sub>3</sub> PO <sub>4</sub>                                         | 32                                                                 |
|         | Li <sub>3</sub> InCl <sub>6</sub>                                     | N/A                                                                                                                                                                                                                                                       | 0                                                                  |
|         | Li <sub>3</sub> BiCl <sub>6</sub>                                     | N/A                                                                                                                                                                                                                                                       | 0                                                                  |
|         | Li <sub>3</sub> ScCl <sub>6</sub>                                     | 0.6667 LiFePO <sub>4</sub> + 0.3333 Li <sub>3</sub> ScCl <sub>6</sub> → 0.3333 ScPO <sub>4</sub> + 0.3333 Fe <sub>2</sub> PClO <sub>4</sub> + 1.667 LiCl                                                                                                  | 29                                                                 |
|         | Li <sub>3</sub> LuCl <sub>6</sub>                                     | 0.6667 LiFePO <sub>4</sub> + 0.3333 Li <sub>3</sub> LuCl <sub>6</sub> → 0.3333 Fe <sub>2</sub> PClO <sub>4</sub> + 0.3333 LuPO <sub>4</sub> + 1.667 LiCl                                                                                                  | 52                                                                 |
|         | Li <sub>3</sub> TmCl <sub>6</sub>                                     | 0.6667 LiFePO <sub>4</sub> + 0.3333 Li <sub>3</sub> TmCl <sub>6</sub> → 0.3333 Fe <sub>2</sub> PClO <sub>4</sub> + 0.3333 TmPO <sub>4</sub> + 1.667 LiCl                                                                                                  | 44                                                                 |
|         | Li <sub>3</sub> ErCl <sub>6</sub>                                     | 0.6667 LiFePO <sub>4</sub> + 0.3333 Li <sub>3</sub> ErCl <sub>6</sub> → 0.3333 Fe <sub>2</sub> PClO <sub>4</sub> + 0.3333 ErPO <sub>4</sub> + 1.667 LiCl                                                                                                  | 47                                                                 |
|         | Li <sub>3</sub> YCl <sub>6</sub>                                      | 0.3333 Li <sub>3</sub> YCl <sub>6</sub> + 0.6667 LiFePO <sub>4</sub> → 0.3333 Fe <sub>2</sub> PClO <sub>4</sub> + 0.3333 YPO <sub>4</sub> + 1.667 LiCl                                                                                                    | 29                                                                 |
|         | Li <sub>3</sub> HoCl <sub>6</sub>                                     | 0.3333 Li <sub>3</sub> HoCl <sub>6</sub> + 0.6667 LiFePO <sub>4</sub> → 0.3333 Fe <sub>2</sub> PClO <sub>4</sub> + 0.3333 HoPO <sub>4</sub> + 1.667 LiCl                                                                                                  | 47                                                                 |
|         | Li <sub>3</sub> DyCl <sub>6</sub>                                     | 0.3333 Li <sub>3</sub> DyCl <sub>6</sub> + 0.6667 LiFePO <sub>4</sub> → 0.3333 Fe <sub>2</sub> PClO <sub>4</sub> + 0.3333 DyPO <sub>4</sub> + 1.667 LiCl                                                                                                  | 39                                                                 |
|         | Li <sub>3</sub> TbCl <sub>6</sub>                                     | 0.6667 LiFePO <sub>4</sub> + 0.3333 Li <sub>3</sub> TbCl <sub>6</sub> → 0.3333 Fe <sub>2</sub> PClO <sub>4</sub> + 0.3333 TbPO <sub>4</sub> + 1.667 LiCl                                                                                                  | 36                                                                 |
|         | Li <sub>3</sub> SmCl <sub>6</sub>                                     | 0.6667 LiFePO <sub>4</sub> + 0.3333 Li <sub>3</sub> SmCl <sub>6</sub> → 0.3333 Fe <sub>2</sub> PClO <sub>4</sub> + 0.3333 SmPO <sub>4</sub> + 1.667 LiCl                                                                                                  | 39                                                                 |
|         | Li <sub>2</sub> ZrCl <sub>6</sub>                                     | 0.75 LiFePO <sub>4</sub> + 0.25 Li <sub>2</sub> ZrCl <sub>6</sub> → 0.125 LiZr <sub>2</sub> (PO <sub>4</sub> ) <sub>3</sub> + 0.375 Fe <sub>2</sub> PClO <sub>4</sub> + 1.125 LiCl                                                                        | 41                                                                 |
|         | Li <sub>2.5</sub> In <sub>0.5</sub> Zr <sub>0.5</sub> Cl <sub>6</sub> | 0.6 LiFePO <sub>4</sub> + 0.4 Li <sub>2.5</sub> Zr <sub>0.5</sub> In <sub>0.5</sub> Cl <sub>6</sub> → 0.2 Li <sub>3</sub> InCl <sub>6</sub> + 0.3 Fe <sub>2</sub> PClO <sub>4</sub> + 0.1 LiZr <sub>2</sub> (PO <sub>4</sub> ) <sub>3</sub> + 0.9 LiCl    | 31                                                                 |
|         | Li <sub>2.5</sub> Sc <sub>0.5</sub> Zr <sub>0.5</sub> Cl <sub>6</sub> | 0.7143 LiFePO <sub>4</sub> + 0.2857 Li <sub>2.5</sub> Zr <sub>0.5</sub> Sc <sub>0.5</sub> Cl <sub>6</sub> → 0.3571 Fe <sub>2</sub> PClO <sub>4</sub> + 0.07143 LiZr <sub>2</sub> (PO <sub>4</sub> ) <sub>3</sub> + 0.1429 ScPO <sub>4</sub> + 1.357 LiCl  | 33                                                                 |
|         | Li <sub>2.5</sub> Y <sub>0.5</sub> Zr <sub>0.5</sub> Cl <sub>6</sub>  | 0.7143 LiFePO <sub>4</sub> + 0.2857 Li <sub>2.5</sub> Y <sub>0.5</sub> Zr <sub>0.5</sub> Cl <sub>6</sub> → 0.07143 LiZr <sub>2</sub> (PO <sub>4</sub> ) <sub>3</sub> + 0.3571 Fe <sub>2</sub> PClO <sub>4</sub> + 0.1429 YPO <sub>4</sub> + 1.357 LiCl    | 35                                                                 |
|         | Li <sub>2.5</sub> Er <sub>0.5</sub> Zr <sub>0.5</sub> Cl <sub>6</sub> | 0.7143 LiFePO <sub>4</sub> + 0.2857 Li <sub>2.5</sub> Er <sub>0.5</sub> Zr <sub>0.5</sub> Cl <sub>6</sub> → 0.07143 LiZr <sub>2</sub> (PO <sub>4</sub> ) <sub>3</sub> + 0.3571 Fe <sub>2</sub> PClO <sub>4</sub> + 0.1429 ErPO <sub>4</sub> + 1.357 LiCl  | 43                                                                 |
|         |                                                                       | Li <sub>3</sub> InCl <sub>3</sub> Br <sub>3</sub>                                                                                                                                                                                                         | Li <sub>3</sub> In(BrCl) <sub>3</sub> → InBr <sub>3</sub> + 3 LiCl |

|     |                                           |                                                                                                                                                                                                                                                 |     |
|-----|-------------------------------------------|-------------------------------------------------------------------------------------------------------------------------------------------------------------------------------------------------------------------------------------------------|-----|
|     | $\text{Li}_3\text{ScCl}_3\text{Br}_3$     | $0.6667 \text{LiFePO}_4 + 0.3333 \text{Li}_3\text{Sc}(\text{BrCl})_3 \rightarrow 0.3333 \text{Fe}_2\text{PClO}_4 + 0.3333 \text{ScPO}_4 + \text{LiBr} + 0.6667 \text{LiCl}$                                                                     | 24  |
|     | $\text{Li}_3\text{LuCl}_3\text{Br}_3$     | $0.5 \text{Li}_3\text{Lu}(\text{BrCl})_3 + 0.5 \text{LiFePO}_4 \rightarrow 0.5 \text{FeBr}_2 + 0.5 \text{LiBr} + 0.5 \text{LuPO}_4 + 1.5 \text{LiCl}$                                                                                           | 57  |
|     | $\text{Li}_3\text{TmCl}_3\text{Br}_3$     | $0.5 \text{LiFePO}_4 + 0.5 \text{Li}_3\text{Tm}(\text{BrCl})_3 \rightarrow 0.5 \text{FeBr}_2 + 0.5 \text{LiBr} + 0.5 \text{TmPO}_4 + 1.5 \text{LiCl}$                                                                                           | 48  |
|     | $\text{Li}_3\text{ErCl}_3\text{Br}_3$     | $0.5 \text{LiFePO}_4 + 0.5 \text{Li}_3\text{Er}(\text{BrCl})_3 \rightarrow 0.5 \text{FeBr}_2 + 0.5 \text{LiBr} + 0.5 \text{ErPO}_4 + 1.5 \text{LiCl}$                                                                                           | 48  |
|     | $\text{Li}_3\text{YCl}_3\text{Br}_3$      | $0.6667 \text{LiFePO}_4 + 0.3333 \text{Li}_3\text{Y}(\text{BrCl})_3 \rightarrow 0.3333 \text{Fe}_2\text{PClO}_4 + \text{LiBr} + 0.3333 \text{YPO}_4 + 0.6667 \text{LiCl}$                                                                       | 25  |
|     | $\text{Li}_3\text{HoCl}_3\text{Br}_3$     | $0.5 \text{LiFePO}_4 + 0.5 \text{Li}_3\text{Ho}(\text{BrCl})_3 \rightarrow 0.5 \text{FeBr}_2 + 0.5 \text{LiBr} + 0.5 \text{HoPO}_4 + 1.5 \text{LiCl}$                                                                                           | 47  |
|     | $\text{Li}_3\text{DyCl}_3\text{Br}_3$     | $0.5 \text{LiFePO}_4 + 0.5 \text{Li}_3\text{Dy}(\text{BrCl})_3 \rightarrow 0.5 \text{FeBr}_2 + 0.5 \text{LiBr} + 0.5 \text{DyPO}_4 + 1.5 \text{LiCl}$                                                                                           | 40  |
|     | $\text{Li}_3\text{TbCl}_3\text{Br}_3$     | $0.5 \text{Li}_3\text{Tb}(\text{BrCl})_3 + 0.5 \text{LiFePO}_4 \rightarrow 0.5 \text{FeBr}_2 + 0.5 \text{LiBr} + 0.5 \text{TbPO}_4 + 1.5 \text{LiCl}$                                                                                           | 36  |
|     | $\text{Li}_3\text{InBr}_6$                | N/A                                                                                                                                                                                                                                             | 0   |
|     | $\text{Li}_3\text{BiBr}_6$                | N/A                                                                                                                                                                                                                                             | 0   |
|     | $\text{Li}_3\text{ScBr}_6$                | $0.25 \text{Li}_3\text{ScBr}_6 + 0.75 \text{LiFePO}_4 \rightarrow 0.25 \text{Fe}_3(\text{PO}_4)_2 + 0.25 \text{ScPO}_4 + 1.5 \text{LiBr}$                                                                                                       | 9   |
|     | $\text{Li}_3\text{LuBr}_6$                | $0.75 \text{LiFePO}_4 + 0.25 \text{Li}_3\text{LuBr}_6 \rightarrow 0.25 \text{Fe}_3(\text{PO}_4)_2 + 0.25 \text{LuPO}_4 + 1.5 \text{LiBr}$                                                                                                       | 22  |
|     | $\text{Li}_3\text{TmBr}_6$                | $0.25 \text{Li}_3\text{TmBr}_6 + 0.75 \text{LiFePO}_4 \rightarrow 0.25 \text{Fe}_3(\text{PO}_4)_2 + 0.25 \text{TmPO}_4 + 1.5 \text{LiBr}$                                                                                                       | 21  |
|     | $\text{Li}_3\text{ErBr}_6$                | $0.25 \text{Li}_3\text{ErBr}_6 + 0.75 \text{LiFePO}_4 \rightarrow 0.25 \text{Fe}_3(\text{PO}_4)_2 + 0.25 \text{ErPO}_4 + 1.5 \text{LiBr}$                                                                                                       | 19  |
|     | $\text{Li}_3\text{YBr}_6$                 | $0.75 \text{LiFePO}_4 + 0.25 \text{Li}_3\text{YBr}_6 \rightarrow 0.25 \text{Fe}_3(\text{PO}_4)_2 + 0.25 \text{YPO}_4 + 1.5 \text{LiBr}$                                                                                                         | 13  |
|     | $\text{Li}_3\text{HoBr}_6$                | $0.25 \text{Li}_3\text{HoBr}_6 + 0.75 \text{LiFePO}_4 \rightarrow 0.25 \text{Fe}_3(\text{PO}_4)_2 + 0.25 \text{HoPO}_4 + 1.5 \text{LiBr}$                                                                                                       | 18  |
|     | $\text{Li}_3\text{DyBr}_6$                | $0.25 \text{Li}_3\text{DyBr}_6 + 0.75 \text{LiFePO}_4 \rightarrow 0.25 \text{Fe}_3(\text{PO}_4)_2 + 0.25 \text{DyPO}_4 + 1.5 \text{LiBr}$                                                                                                       | 18  |
|     | $\text{Li}_3\text{TbBr}_6$                | $0.75 \text{LiFePO}_4 + 0.25 \text{Li}_3\text{TbBr}_6 \rightarrow 0.25 \text{Fe}_3(\text{PO}_4)_2 + 0.25 \text{TbPO}_4 + 1.5 \text{LiBr}$                                                                                                       | 17  |
|     | $\text{Li}_3\text{ScI}_6$                 | $0.5 \text{LiFePO}_4 + 0.5 \text{Li}_3\text{ScI}_6 \rightarrow 0.5 \text{FeI}_2 + 0.5 \text{ScPO}_4 + 2 \text{LiI}$                                                                                                                             | 14  |
|     | $\text{Li}_3\text{LuI}_6$                 | $0.5 \text{LiFePO}_4 + 0.5 \text{Li}_3\text{LuI}_6 \rightarrow 0.5 \text{FeI}_2 + 0.5 \text{LuPO}_4 + 2 \text{LiI}$                                                                                                                             | 43  |
|     | $\text{Li}_3\text{TmI}_6$                 | $0.5 \text{LiFePO}_4 + 0.5 \text{Li}_3\text{TmI}_6 \rightarrow 0.5 \text{FeI}_2 + 0.5 \text{TmPO}_4 + 2 \text{LiI}$                                                                                                                             | 40  |
|     | $\text{Li}_3\text{ErI}_6$                 | $0.5 \text{Li}_3\text{ErI}_6 + 0.5 \text{LiFePO}_4 \rightarrow 0.5 \text{FeI}_2 + 0.5 \text{ErPO}_4 + 2 \text{LiI}$                                                                                                                             | 36  |
|     | $\text{Li}_3\text{HoI}_6$                 | $0.5 \text{Li}_3\text{HoI}_6 + 0.5 \text{LiFePO}_4 \rightarrow 0.5 \text{FeI}_2 + 0.5 \text{HoPO}_4 + 2 \text{LiI}$                                                                                                                             | 33  |
|     | $\text{Li}_3\text{DyI}_6$                 | $0.5 \text{Li}_3\text{DyI}_6 + 0.5 \text{LiFePO}_4 \rightarrow 0.5 \text{FeI}_2 + 0.5 \text{DyPO}_4 + 2 \text{LiI}$                                                                                                                             | 31  |
|     | $\text{Li}_3\text{TbI}_6$                 | $0.5 \text{Li}_3\text{TbI}_6 + 0.5 \text{LiFePO}_4 \rightarrow 0.5 \text{FeI}_2 + 0.5 \text{TbPO}_4 + 2 \text{LiI}$                                                                                                                             | 28  |
|     | $\text{Li}_3\text{SmI}_6$                 | $0.5 \text{LiFePO}_4 + 0.5 \text{Li}_3\text{SmI}_6 \rightarrow 0.5 \text{FeI}_2 + 0.5 \text{SmPO}_4 + 2 \text{LiI}$                                                                                                                             | 17  |
|     | $\text{Li}_3\text{PS}_4$                  | $0.6857 \text{LiCoO}_2 + 0.3143 \text{Li}_3\text{PS}_4 \rightarrow 0.02857 \text{Li}_2\text{SO}_4 + 0.2286 \text{Co}_3\text{S}_4 + 0.3143 \text{Li}_2\text{S} + 0.3143 \text{Li}_3\text{PO}_4$                                                  | 413 |
| LCO | $\text{Li}_{10}\text{GeP}_2\text{S}_{12}$ | $0.1325 \text{Li}_{10}\text{Ge}(\text{PS}_6)_2 + 0.8675 \text{LiCoO}_2 \rightarrow 0.1325 \text{Li}_4\text{GeO}_4 + 0.03614 \text{Li}_2\text{SO}_4 + 0.2892 \text{Co}_3\text{S}_4 + 0.3976 \text{Li}_2\text{S} + 0.2651 \text{Li}_3\text{PO}_4$ | 349 |

|                                                                       |                                                                                                                                                                                                                                                                                                       |     |
|-----------------------------------------------------------------------|-------------------------------------------------------------------------------------------------------------------------------------------------------------------------------------------------------------------------------------------------------------------------------------------------------|-----|
| Li <sub>6</sub> PS <sub>5</sub> Cl                                    | $0.3143 \text{ Li}_6\text{PS}_5\text{Cl} + 0.6857 \text{ LiCoO}_2 \rightarrow 0.6286 \text{ Li}_2\text{S} + 0.3143 \text{ Li}_3\text{PO}_4 + 0.2286 \text{ Co}_3\text{S}_4 + 0.3143 \text{ LiCl} + 0.02857 \text{ Li}_2\text{SO}_4$                                                                   | 369 |
| Li <sub>7</sub> La <sub>3</sub> Zr <sub>2</sub> O <sub>12</sub>       | $\text{Li}_7\text{La}_3\text{Zr}_2\text{O}_{12} \rightarrow \text{Li}_7\text{La}_3\text{Zr}_2\text{O}_{12}$                                                                                                                                                                                           | 0   |
| LiGaO <sub>2</sub>                                                    | $\text{LiGaO}_2 \rightarrow \text{LiGaO}_2$                                                                                                                                                                                                                                                           | 0   |
| Li <sub>2</sub> La <sub>2</sub> Ti <sub>3</sub> O <sub>10</sub>       | $\text{Li}_2\text{La}_2\text{Ti}_3\text{O}_{10} \rightarrow \text{La}_2\text{Ti}_2\text{O}_7 + \text{Li}_2\text{TiO}_3$                                                                                                                                                                               | 20  |
| Li <sub>3</sub> InCl <sub>6</sub>                                     | $0.2857 \text{ Li}_3\text{InCl}_6 + 0.7143 \text{ LiCoO}_2 \rightarrow 0.1429 \text{ Co}_3\text{O}_4 + 0.1429 \text{ Li}(\text{CoO}_2)_2 + 0.2857 \text{ InClO} + 1.429 \text{ LiCl}$                                                                                                                 | 14  |
| Li <sub>3</sub> BiCl <sub>6</sub>                                     | $0.7143 \text{ LiCoO}_2 + 0.2857 \text{ Li}_3\text{BiCl}_6 \rightarrow 0.1429 \text{ Li}(\text{CoO}_2)_2 + 0.2857 \text{ BiClO} + 0.1429 \text{ Co}_3\text{O}_4 + 1.429 \text{ LiCl}$                                                                                                                 | 30  |
| Li <sub>3</sub> ScCl <sub>6</sub>                                     | $0.7895 \text{ LiCoO}_2 + 0.2105 \text{ Li}_3\text{ScCl}_6 \rightarrow 0.1579 \text{ Co}_3\text{O}_4 + 0.1579 \text{ Li}(\text{CoO}_2)_2 + 1.263 \text{ LiCl} + 0.1053 \text{ Sc}_2\text{O}_3$                                                                                                        | 54  |
| Li <sub>3</sub> LuCl <sub>6</sub>                                     | $0.2105 \text{ Li}_3\text{LuCl}_6 + 0.7895 \text{ LiCoO}_2 \rightarrow 0.1579 \text{ Co}_3\text{O}_4 + 0.1579 \text{ Li}(\text{CoO}_2)_2 + 1.263 \text{ LiCl} + 0.1053 \text{ Lu}_2\text{O}_3$                                                                                                        | 52  |
| Li <sub>3</sub> TmCl <sub>6</sub>                                     | $0.7143 \text{ LiCoO}_2 + 0.2857 \text{ Li}_3\text{TmCl}_6 \rightarrow 0.2857 \text{ TmClO} + 0.1429 \text{ Li}(\text{CoO}_2)_2 + 0.1429 \text{ Co}_3\text{O}_4 + 1.429 \text{ LiCl}$                                                                                                                 | 50  |
| Li <sub>3</sub> ErCl <sub>6</sub>                                     | $0.7143 \text{ LiCoO}_2 + 0.2857 \text{ Li}_3\text{ErCl}_6 \rightarrow 0.1429 \text{ Co}_3\text{O}_4 + 0.1429 \text{ Li}(\text{CoO}_2)_2 + 0.2857 \text{ ErClO} + 1.429 \text{ LiCl}$                                                                                                                 | 48  |
| Li <sub>3</sub> YCl <sub>6</sub>                                      | $0.2857 \text{ Li}_3\text{YCl}_6 + 0.7143 \text{ LiCoO}_2 \rightarrow 0.1429 \text{ Li}(\text{CoO}_2)_2 + 0.1429 \text{ Co}_3\text{O}_4 + 0.2857 \text{ YClO} + 1.429 \text{ LiCl}$                                                                                                                   | 33  |
| Li <sub>3</sub> HoCl <sub>6</sub>                                     | $0.2857 \text{ Li}_3\text{HoCl}_6 + 0.7143 \text{ LiCoO}_2 \rightarrow 0.1429 \text{ Li}(\text{CoO}_2)_2 + 0.2857 \text{ HoClO} + 0.1429 \text{ Co}_3\text{O}_4 + 1.429 \text{ LiCl}$                                                                                                                 | 46  |
| Li <sub>3</sub> DyCl <sub>6</sub>                                     | $0.2857 \text{ Li}_3\text{DyCl}_6 + 0.7143 \text{ LiCoO}_2 \rightarrow 0.1429 \text{ Co}_3\text{O}_4 + 0.1429 \text{ Li}(\text{CoO}_2)_2 + 0.2857 \text{ DyClO} + 1.429 \text{ LiCl}$                                                                                                                 | 45  |
| Li <sub>3</sub> TbCl <sub>6</sub>                                     | $0.7778 \text{ LiCoO}_2 + 0.2222 \text{ Li}_3\text{TbCl}_6 \rightarrow 0.2222 \text{ TbCoO}_3 + 0.1111 \text{ Li}(\text{CoO}_2)_2 + 0.1111 \text{ Co}_3\text{O}_4 + 1.333 \text{ LiCl}$                                                                                                               | 30  |
| Li <sub>3</sub> SmCl <sub>6</sub>                                     | $0.7143 \text{ LiCoO}_2 + 0.2857 \text{ Li}_3\text{SmCl}_6 \rightarrow 0.1429 \text{ Co}_3\text{O}_4 + 0.1429 \text{ Li}(\text{CoO}_2)_2 + 0.2857 \text{ SmClO} + 1.429 \text{ LiCl}$                                                                                                                 | 45  |
| Li <sub>2</sub> ZrCl <sub>6</sub>                                     | $0.8 \text{ LiCoO}_2 + 0.2 \text{ Li}_2\text{ZrCl}_6 \rightarrow 0.03478 \text{ Co}_{23}\text{O}_{32} + 0.02174 \text{ LiClO}_4 + 1.178 \text{ LiCl} + 0.2 \text{ ZrO}_2$                                                                                                                             | 65  |
| Li <sub>2.5</sub> In <sub>0.5</sub> Zr <sub>0.5</sub> Cl <sub>6</sub> | $0.7021 \text{ LiCoO}_2 + 0.2979 \text{ Li}_{2.5}\text{Zr}_{0.5}\text{In}_{0.5}\text{Cl}_6 \rightarrow 0.02128 \text{ Co}_{23}\text{O}_{32} + 0.1064 \text{ Li}(\text{CoO}_2)_2 + 0.1489 \text{ Li}_3\text{InCl}_6 + 0.8936 \text{ LiCl} + 0.1489 \text{ ZrO}_2$                                      | 48  |
| Li <sub>2.5</sub> Sc <sub>0.5</sub> Zr <sub>0.5</sub> Cl <sub>6</sub> | $0.8049 \text{ LiCoO}_2 + 0.1951 \text{ Li}_{2.5}\text{Zr}_{0.5}\text{Sc}_{0.5}\text{Cl}_6 \rightarrow 0.02439 \text{ Co}_{23}\text{O}_{32} + 0.122 \text{ Li}(\text{CoO}_2)_2 + 0.02261 \text{ Zr}_3\text{Sc}_4\text{O}_{12} + 0.00119 \text{ Zr}_{25}\text{Sc}_6\text{O}_{59} + 1.171 \text{ LiCl}$ | 49  |
| Li <sub>2.5</sub> Y <sub>0.5</sub> Zr <sub>0.5</sub> Cl <sub>6</sub>  | $0.2979 \text{ Li}_{2.5}\text{Y}_{0.5}\text{Zr}_{0.5}\text{Cl}_6 + 0.7021 \text{ LiCoO}_2 \rightarrow 0.1064 \text{ Li}(\text{CoO}_2)_2 + 0.02128 \text{ Co}_{23}\text{O}_{32} + 0.1489 \text{ YCl}_3 + 1.34 \text{ LiCl} + 0.1489 \text{ ZrO}_2$                                                     | 48  |
| Li <sub>2.5</sub> Er <sub>0.5</sub> Zr <sub>0.5</sub> Cl <sub>6</sub> | $0.7795 \text{ LiCoO}_2 + 0.2205 \text{ Li}_{2.5}\text{Er}_{0.5}\text{Zr}_{0.5}\text{Cl}_6 \rightarrow 0.1181 \text{ Li}(\text{CoO}_2)_2 + 0.02362 \text{ Co}_{23}\text{O}_{32} + 1.213 \text{ LiCl} + 0.1102 \text{ ErClO} + 0.1102 \text{ ZrO}_2$                                                   | 54  |
| Li <sub>3</sub> InCl <sub>3</sub> Br <sub>3</sub>                     | $\text{LiCoO}_2 \rightarrow \text{LiCoO}_2$                                                                                                                                                                                                                                                           | 0   |
| Li <sub>3</sub> ScCl <sub>3</sub> Br <sub>3</sub>                     | $0.6923 \text{ LiCoO}_2 + 0.3077 \text{ Li}_3\text{Sc}(\text{BrCl})_3 \rightarrow 0.8077 \text{ LiBr} + 0.1154 \text{ BrCl} + 0.2308 \text{ Co}_3\text{O}_4 + 0.8077 \text{ LiCl} + 0.1538 \text{ Sc}_2\text{O}_3$                                                                                    | 41  |
| Li <sub>3</sub> LuCl <sub>3</sub> Br <sub>3</sub>                     | $0.4 \text{ Li}_3\text{Lu}(\text{BrCl})_3 + 0.6 \text{ LiCoO}_2 \rightarrow 0.4 \text{ LuBrO} + 0.7 \text{ LiBr} + 0.1 \text{ BrCl} + 0.2 \text{ Co}_3\text{O}_4 + 1.1 \text{ LiCl}$                                                                                                                  | 49  |
| Li <sub>3</sub> TmCl <sub>3</sub> Br <sub>3</sub>                     | $0.6 \text{ LiCoO}_2 + 0.4 \text{ Li}_3\text{Tm}(\text{BrCl})_3 \rightarrow 0.4 \text{ TmClO} + 1.1 \text{ LiBr} + 0.1 \text{ BrCl} + 0.2 \text{ Co}_3\text{O}_4 + 0.7 \text{ LiCl}$                                                                                                                  | 45  |
| Li <sub>3</sub> ErCl <sub>3</sub> Br <sub>3</sub>                     | $0.6 \text{ LiCoO}_2 + 0.4 \text{ Li}_3\text{Er}(\text{BrCl})_3 \rightarrow 0.4 \text{ ErBrO} + 0.7 \text{ LiBr} + 0.1 \text{ BrCl} + 0.2 \text{ Co}_3\text{O}_4 + 1.1 \text{ LiCl}$                                                                                                                  | 43  |
| Li <sub>3</sub> YCl <sub>3</sub> Br <sub>3</sub>                      | $0.7143 \text{ LiCoO}_2 + 0.2857 \text{ Li}_3\text{Y}(\text{BrCl})_3 \rightarrow 0.1429 \text{ Li}(\text{CoO}_2)_2 + 0.2857 \text{ YClO} + 0.8571 \text{ LiBr} + 0.1429 \text{ Co}_3\text{O}_4 + 0.5714 \text{ LiCl}$                                                                                 | 19  |

|     |                                                  |                                                                                                                                                                                                                                                    |     |
|-----|--------------------------------------------------|----------------------------------------------------------------------------------------------------------------------------------------------------------------------------------------------------------------------------------------------------|-----|
|     | $\text{Li}_3\text{HoCl}_3\text{Br}_3$            | $0.6 \text{LiCoO}_2 + 0.4 \text{Li}_3\text{Ho}(\text{BrCl})_3 \rightarrow 0.7 \text{LiBr} + 0.4 \text{HoBrO} + 0.1 \text{BrCl} + 0.2 \text{Co}_3\text{O}_4 + 1.1 \text{LiCl}$                                                                      | 43  |
|     | $\text{Li}_3\text{DyCl}_3\text{Br}_3$            | $0.6 \text{LiCoO}_2 + 0.4 \text{Li}_3\text{Dy}(\text{BrCl})_3 \rightarrow 0.4 \text{DyClO} + 1.1 \text{LiBr} + 0.1 \text{BrCl} + 0.2 \text{Co}_3\text{O}_4 + 0.7 \text{LiCl}$                                                                      | 37  |
|     | $\text{Li}_3\text{TbCl}_3\text{Br}_3$            | $0.2222 \text{Li}_3\text{Tb}(\text{BrCl})_3 + 0.7778 \text{LiCoO}_2 \rightarrow 0.1111 \text{Li}(\text{CoO}_2)_2 + 0.2222 \text{TbCoO}_3 + 0.6667 \text{LiBr} + 0.1111 \text{Co}_3\text{O}_4 + 0.6667 \text{LiCl}$                                 | 16  |
|     | $\text{Li}_3\text{InBr}_6$                       | N/A                                                                                                                                                                                                                                                | 0   |
|     | $\text{Li}_3\text{BiBr}_6$                       | N/A                                                                                                                                                                                                                                                | 0   |
|     | $\text{Li}_3\text{ScBr}_6$                       | $0.4 \text{Li}_3\text{ScBr}_6 + 0.6 \text{LiCoO}_2 \rightarrow 1.8 \text{LiBr} + 0.6 \text{CoO} + 0.6 \text{Br} + 0.2 \text{Sc}_2\text{O}_3$                                                                                                       | 73  |
|     | $\text{Li}_3\text{LuBr}_6$                       | $0.5 \text{Li}_3\text{LuBr}_6 + 0.5 \text{LiCoO}_2 \rightarrow 0.5 \text{LuBrO} + 2 \text{LiBr} + 0.5 \text{CoO} + 0.5 \text{Br}$                                                                                                                  | 61  |
|     | $\text{Li}_3\text{TmBr}_6$                       | $0.5 \text{Li}_3\text{TmBr}_6 + 0.5 \text{LiCoO}_2 \rightarrow 0.5 \text{TmBrO} + 2 \text{LiBr} + 0.5 \text{CoO} + 0.5 \text{Br}$                                                                                                                  | 60  |
|     | $\text{Li}_3\text{ErBr}_6$                       | $0.5 \text{Li}_3\text{ErBr}_6 + 0.5 \text{LiCoO}_2 \rightarrow 0.5 \text{ErBrO} + 2 \text{LiBr} + 0.5 \text{CoO} + 0.5 \text{Br}$                                                                                                                  | 58  |
|     | $\text{Li}_3\text{YBr}_6$                        | $0.5 \text{Li}_3\text{YBr}_6 + 0.5 \text{LiCoO}_2 \rightarrow 0.5 \text{YBrO} + 2 \text{LiBr} + 0.5 \text{CoO} + 0.5 \text{Br}$                                                                                                                    | 49  |
|     | $\text{Li}_3\text{HoBr}_6$                       | $0.5 \text{Li}_3\text{HoBr}_6 + 0.5 \text{LiCoO}_2 \rightarrow 0.5 \text{HoBrO} + 2 \text{LiBr} + 0.5 \text{CoO} + 0.5 \text{Br}$                                                                                                                  | 58  |
|     | $\text{Li}_3\text{DyBr}_6$                       | $0.4 \text{Li}_3\text{DyBr}_6 + 0.6 \text{LiCoO}_2 \rightarrow 1.8 \text{LiBr} + 0.6 \text{CoO} + 0.6 \text{Br} + 0.2 \text{Dy}_2\text{O}_3$                                                                                                       | 40  |
|     | $\text{Li}_3\text{TbBr}_6$                       | $0.6 \text{LiCoO}_2 + 0.4 \text{Li}_3\text{TbBr}_6 \rightarrow 1.8 \text{LiBr} + 0.6 \text{CoO} + 0.6 \text{Br} + 0.2 \text{Tb}_2\text{O}_3$                                                                                                       | 36  |
|     | $\text{Li}_3\text{ScI}_6$                        | $0.4 \text{Li}_3\text{ScI}_6 + 0.6 \text{LiCoO}_2 \rightarrow 0.6 \text{CoO} + 1.8 \text{LiI} + 0.2 \text{Sc}_2\text{O}_3 + 0.6 \text{I}$                                                                                                          | 134 |
|     | $\text{Li}_3\text{LuI}_6$                        | $0.6 \text{LiCoO}_2 + 0.4 \text{Li}_3\text{LuI}_6 \rightarrow 0.6 \text{CoO} + 1.8 \text{LiI} + 0.2 \text{Lu}_2\text{O}_3 + 0.6 \text{I}$                                                                                                          | 128 |
|     | $\text{Li}_3\text{TmI}_6$                        | $0.4 \text{Li}_3\text{TmI}_6 + 0.6 \text{LiCoO}_2 \rightarrow 0.6 \text{CoO} + 1.8 \text{LiI} + 0.2 \text{Tm}_2\text{O}_3 + 0.6 \text{I}$                                                                                                          | 119 |
|     | $\text{Li}_3\text{ErI}_6$                        | $0.4 \text{Li}_3\text{ErI}_6 + 0.6 \text{LiCoO}_2 \rightarrow 0.6 \text{CoO} + 1.8 \text{LiI} + 0.2 \text{Er}_2\text{O}_3 + 0.6 \text{I}$                                                                                                          | 111 |
|     | $\text{Li}_3\text{HoI}_6$                        | $0.5 \text{Li}_3\text{HoI}_6 + 0.5 \text{LiCoO}_2 \rightarrow 0.5 \text{HoIO} + 0.5 \text{CoO} + 2 \text{LiI} + 0.5 \text{I}$                                                                                                                      | 109 |
|     | $\text{Li}_3\text{DyI}_6$                        | $0.4 \text{Li}_3\text{DyI}_6 + 0.6 \text{LiCoO}_2 \rightarrow 0.6 \text{CoO} + 1.8 \text{LiI} + 0.2 \text{Dy}_2\text{O}_3 + 0.6 \text{I}$                                                                                                          | 101 |
|     | $\text{Li}_3\text{TbI}_6$                        | $0.4 \text{Li}_3\text{TbI}_6 + 0.6 \text{LiCoO}_2 \rightarrow 0.6 \text{CoO} + 1.8 \text{LiI} + 0.2 \text{Tb}_2\text{O}_3 + 0.6 \text{I}$                                                                                                          | 96  |
|     | $\text{Li}_3\text{SmI}_6$                        | $0.5 \text{LiCoO}_2 + 0.5 \text{Li}_3\text{SmI}_6 \rightarrow 0.5 \text{SmIO} + 0.5 \text{CoO} + 2 \text{LiI} + 0.5 \text{I}$                                                                                                                      | 97  |
|     | $\text{Li}_3\text{PS}_4$                         | $0.5 \text{Li}_3\text{PS}_4 + 0.5 \text{LiMn}_2\text{O}_4 \rightarrow 0.5 \text{Li}(\text{MnS}_2)_2 + 0.5 \text{Li}_3\text{PO}_4$                                                                                                                  | 348 |
|     | $\text{Li}_{10}\text{GeP}_2\text{S}_{12}$        | $0.3333 \text{Li}_{10}\text{Ge}(\text{PS}_6)_2 + 0.6667 \text{LiMn}_2\text{O}_4 \rightarrow 0.3333 \text{Li}_4\text{GeS}_4 + 0.6667 \text{Li}(\text{MnS}_2)_2 + 0.6667 \text{Li}_3\text{PO}_4$                                                     | 281 |
|     | $\text{Li}_6\text{PS}_5\text{Cl}$                | $0.5 \text{Li}_6\text{PS}_5\text{Cl} + 0.5 \text{LiMn}_2\text{O}_4 \rightarrow 0.5 \text{Li}_3\text{PO}_4 + 0.5 \text{Li}(\text{MnS}_2)_2 + 0.5 \text{Li}_2\text{S} + 0.5 \text{LiCl}$                                                             | 317 |
| LMO | $\text{Li}_7\text{La}_3\text{Zr}_2\text{O}_{12}$ | $0.2778 \text{Li}_7\text{La}_3\text{Zr}_2\text{O}_{12} + 0.7222 \text{LiMn}_2\text{O}_4 \rightarrow 0.2778 \text{Li}_6\text{Zr}_2\text{O}_7 + 0.3889 \text{Li}_2\text{MnO}_3 + 0.2222 \text{LiMnO}_2 + 0.1667 \text{La}_5\text{Mn}_5\text{O}_{16}$ | 110 |
|     | $\text{LiGaO}_2$                                 | $\text{LiGaO}_2 \rightarrow \text{LiGaO}_2$                                                                                                                                                                                                        | 0   |
|     | $\text{Li}_2\text{La}_2\text{Ti}_3\text{O}_{10}$ | $0.4545 \text{Li}_2\text{La}_2\text{Ti}_3\text{O}_{10} + 0.5455 \text{LiMn}_2\text{O}_4 \rightarrow 0.1818 \text{Li}_2\text{MnO}_3 + 0.2727 \text{Li}_4\text{Ti}_5\text{O}_{12} + 0.1818 \text{La}_5\text{Mn}_5\text{O}_{16}$                      | 80  |
|     | $\text{Li}_3\text{InCl}_6$                       | N/A                                                                                                                                                                                                                                                | 0   |

|                                                            |                                                                                                                                                                                                                                                                       |    |
|------------------------------------------------------------|-----------------------------------------------------------------------------------------------------------------------------------------------------------------------------------------------------------------------------------------------------------------------|----|
| $\text{Li}_3\text{BiCl}_6$                                 | $0.3333 \text{Li}_3\text{BiCl}_6 + 0.6667 \text{LiMn}_2\text{O}_4 \rightarrow 0.3333 \text{Mn}_2\text{O}_3 + 0.3333 \text{BiClO} + 0.6667 \text{MnO}_2 + 1.667 \text{LiCl}$                                                                                           | 1  |
| $\text{Li}_3\text{ScCl}_6$                                 | $0.25 \text{Li}_3\text{ScCl}_6 + 0.75 \text{LiMn}_2\text{O}_4 \rightarrow 0.125 \text{Sc}_2\text{Mn}_2\text{O}_7 + 0.375 \text{Mn}_2\text{O}_3 + 0.5 \text{MnO}_2 + 1.5 \text{LiCl}$                                                                                  | 18 |
| $\text{Li}_3\text{LuCl}_6$                                 | $0.25 \text{Li}_3\text{LuCl}_6 + 0.75 \text{LiMn}_2\text{O}_4 \rightarrow 0.375 \text{Mn}_2\text{O}_3 + 0.125 \text{Lu}_2\text{Mn}_2\text{O}_7 + 0.5 \text{MnO}_2 + 1.5 \text{LiCl}$                                                                                  | 28 |
| $\text{Li}_3\text{TmCl}_6$                                 | $0.25 \text{Li}_3\text{TmCl}_6 + 0.75 \text{LiMn}_2\text{O}_4 \rightarrow 0.375 \text{Mn}_2\text{O}_3 + 0.125 \text{Tm}_2\text{Mn}_2\text{O}_7 + 0.5 \text{MnO}_2 + 1.5 \text{LiCl}$                                                                                  | 20 |
| $\text{Li}_3\text{ErCl}_6$                                 | $0.75 \text{LiMn}_2\text{O}_4 + 0.25 \text{Li}_3\text{ErCl}_6 \rightarrow 0.25 \text{Mn}_2\text{O}_3 + 0.25 \text{ErMn}_2\text{O}_5 + 0.5 \text{MnO}_2 + 1.5 \text{LiCl}$                                                                                             | 27 |
| $\text{Li}_3\text{YCl}_6$                                  | $0.25 \text{Li}_3\text{HoCl}_6 + 0.75 \text{LiMn}_2\text{O}_4 \rightarrow 0.25 \text{Mn}_2\text{O}_3 + 0.25 \text{HoMn}_2\text{O}_5 + 0.5 \text{MnO}_2 + 1.5 \text{LiCl}$                                                                                             | 14 |
| $\text{Li}_3\text{HoCl}_6$                                 | $0.25 \text{Li}_3\text{HoCl}_6 + 0.75 \text{LiMn}_2\text{O}_4 \rightarrow 0.25 \text{Mn}_2\text{O}_3 + 0.25 \text{HoMn}_2\text{O}_5 + 0.5 \text{MnO}_2 + 1.5 \text{LiCl}$                                                                                             | 27 |
| $\text{Li}_3\text{DyCl}_6$                                 | $0.25 \text{Li}_3\text{DyCl}_6 + 0.75 \text{LiMn}_2\text{O}_4 \rightarrow 0.25 \text{Mn}_2\text{O}_3 + 0.25 \text{DyMn}_2\text{O}_5 + 0.5 \text{MnO}_2 + 1.5 \text{LiCl}$                                                                                             | 22 |
| $\text{Li}_3\text{TbCl}_6$                                 | $0.25 \text{Li}_3\text{TbCl}_6 + 0.75 \text{LiMn}_2\text{O}_4 \rightarrow 0.25 \text{TbMn}_2\text{O}_5 + 0.25 \text{Mn}_2\text{O}_3 + 0.5 \text{MnO}_2 + 1.5 \text{LiCl}$                                                                                             | 20 |
| $\text{Li}_3\text{SmCl}_6$                                 | $0.3333 \text{Li}_3\text{SmCl}_6 + 0.6667 \text{LiMn}_2\text{O}_4 \rightarrow 0.3333 \text{Mn}_2\text{O}_3 + 0.6667 \text{MnO}_2 + 1.667 \text{LiCl} + 0.3333 \text{SmClO}$                                                                                           | 13 |
| $\text{Li}_2\text{ZrCl}_6$                                 | $0.25 \text{Li}_2\text{ZrCl}_6 + 0.75 \text{LiMn}_2\text{O}_4 \rightarrow 0.08333 \text{Mn}_8\text{Cl}_3\text{O}_{10} + 0.8333 \text{MnO}_2 + 1.25 \text{LiCl} + 0.25 \text{ZrO}_2$                                                                                   | 36 |
| $\text{Li}_{2.5}\text{In}_{0.5}\text{Zr}_{0.5}\text{Cl}_6$ | $0.4 \text{Li}_{2.5}\text{Zr}_{0.5}\text{In}_{0.5}\text{Cl}_6 + 0.6 \text{LiMn}_2\text{O}_4 \rightarrow 0.6667 \text{MnO}_2 + 0.06667 \text{Mn}_8\text{Cl}_3\text{O}_{10} + 0.2 \text{Li}_3\text{InCl}_6 + \text{LiCl} + 0.2 \text{ZrO}_2$                            | 27 |
| $\text{Li}_{2.5}\text{Sc}_{0.5}\text{Zr}_{0.5}\text{Cl}_6$ | $0.2759 \text{Li}_{2.5}\text{Zr}_{0.5}\text{Sc}_{0.5}\text{Cl}_6 + 0.7241 \text{LiMn}_2\text{O}_4 \rightarrow 0.06897 \text{Sc}_2\text{Mn}_2\text{O}_7 + 0.6667 \text{MnO}_2 + 0.08046 \text{Mn}_8\text{Cl}_3\text{O}_{10} + 1.414 \text{LiCl} + 0.1379 \text{ZrO}_2$ | 27 |
| $\text{Li}_{2.5}\text{Y}_{0.5}\text{Zr}_{0.5}\text{Cl}_6$  | $0.4 \text{Li}_{2.5}\text{Y}_{0.5}\text{Zr}_{0.5}\text{Cl}_6 + 0.6 \text{LiMn}_2\text{O}_4 \rightarrow 0.2 \text{YCl}_3 + 0.06667 \text{Mn}_8\text{Cl}_3\text{O}_{10} + 0.6667 \text{MnO}_2 + 1.6 \text{LiCl} + 0.2 \text{ZrO}_2$                                     | 27 |
| $\text{Li}_{2.5}\text{Er}_{0.5}\text{Zr}_{0.5}\text{Cl}_6$ | $0.7333 \text{LiMn}_2\text{O}_4 + 0.2667 \text{Li}_{2.5}\text{Er}_{0.5}\text{Zr}_{0.5}\text{Cl}_6 \rightarrow 0.1333 \text{ErMn}_2\text{O}_5 + 0.06667 \text{Mn}_8\text{Cl}_3\text{O}_{10} + 0.6667 \text{MnO}_2 + 1.4 \text{LiCl} + 0.1333 \text{ZrO}_2$             | 33 |
| $\text{Li}_3\text{InCl}_3\text{Br}_3$                      | $\text{Li}_3\text{In}(\text{BrCl})_3 \rightarrow \text{InBr}_3 + 3 \text{LiCl}$                                                                                                                                                                                       | 0  |
| $\text{Li}_3\text{ScCl}_3\text{Br}_3$                      | $0.4286 \text{LiMn}_2\text{O}_4 + 0.5714 \text{Li}_3\text{Sc}(\text{BrCl})_3 \rightarrow 0.05714 \text{Mn}_{15}(\text{Br}_3\text{O}_{10})_2 + 0.6143 \text{LiBr} + 0.5714 \text{ScBrO} + 0.1857 \text{BrCl} + 1.529 \text{LiCl}$                                      | 33 |
| $\text{Li}_3\text{LuCl}_3\text{Br}_3$                      | $0.381 \text{Li}_3\text{Lu}(\text{BrCl})_3 + 0.619 \text{LiMn}_2\text{O}_4 \rightarrow 0.1905 \text{Lu}_2\text{Mn}_2\text{O}_7 + 1.052 \text{LiCl} + 0.05714 \text{Mn}_{15}(\text{Br}_3\text{O}_{10})_2 + 0.7095 \text{LiBr} + 0.09048 \text{BrCl}$                   | 47 |
| $\text{Li}_3\text{TmCl}_3\text{Br}_3$                      | $0.6364 \text{LiMn}_2\text{O}_4 + 0.3636 \text{Li}_3\text{Tm}(\text{BrCl})_3 \rightarrow 0.3636 \text{TmMn}_2\text{O}_5 + 0.9727 \text{LiCl} + 0.03636 \text{Mn}_{15}(\text{Br}_3\text{O}_{10})_2 + 0.7545 \text{LiBr} + 0.1182 \text{BrCl}$                          | 40 |
| $\text{Li}_3\text{ErCl}_3\text{Br}_3$                      | $0.3636 \text{Li}_3\text{Er}(\text{BrCl})_3 + 0.6364 \text{LiMn}_2\text{O}_4 \rightarrow 0.03636 \text{Mn}_{15}(\text{Br}_3\text{O}_{10})_2 + 0.3636 \text{ErMn}_2\text{O}_5 + 0.9727 \text{LiCl} + 0.7545 \text{LiBr} + 0.1182 \text{BrCl}$                          | 41 |
| $\text{Li}_3\text{YCl}_3\text{Br}_3$                       | $0.3636 \text{Li}_3\text{Y}(\text{BrCl})_3 + 0.6364 \text{LiMn}_2\text{O}_4 \rightarrow 0.03636 \text{Mn}_{15}(\text{Br}_3\text{O}_{10})_2 + 0.7545 \text{LiBr} + 0.3636 \text{YMn}_2\text{O}_5 + 0.1182 \text{BrCl} + 0.9727 \text{LiCl}$                            | 21 |
| $\text{Li}_3\text{HoCl}_3\text{Br}_3$                      | $0.3636 \text{Li}_3\text{Ho}(\text{BrCl})_3 + 0.6364 \text{LiMn}_2\text{O}_4 \rightarrow 0.3636 \text{HoMn}_2\text{O}_5 + 0.9727 \text{LiCl} + 0.03636 \text{Mn}_{15}(\text{Br}_3\text{O}_{10})_2 + 0.7545 \text{LiBr} + 0.1182 \text{BrCl}$                          | 41 |
| $\text{Li}_3\text{DyCl}_3\text{Br}_3$                      | $0.3636 \text{Li}_3\text{Dy}(\text{BrCl})_3 + 0.6364 \text{LiMn}_2\text{O}_4 \rightarrow 0.03636 \text{Mn}_{15}(\text{Br}_3\text{O}_{10})_2 + 0.3636 \text{DyMn}_2\text{O}_5 + 0.9727 \text{LiCl} + 0.7545 \text{LiBr} + 0.1182 \text{BrCl}$                          | 36 |
| $\text{Li}_3\text{TbCl}_3\text{Br}_3$                      | $0.3636 \text{Li}_3\text{Tb}(\text{BrCl})_3 + 0.6364 \text{LiMn}_2\text{O}_4 \rightarrow 0.03636 \text{Mn}_{15}(\text{Br}_3\text{O}_{10})_2 + 0.9727 \text{LiCl} + 0.7545 \text{LiBr} + 0.3636$                                                                       | 33 |

|     |                                                                 | TbMn <sub>2</sub> O <sub>5</sub> + 0.1182 BrCl                                                                                                                                                                                                                                         |     |
|-----|-----------------------------------------------------------------|----------------------------------------------------------------------------------------------------------------------------------------------------------------------------------------------------------------------------------------------------------------------------------------|-----|
|     | Li <sub>3</sub> InBr <sub>6</sub>                               | N/A                                                                                                                                                                                                                                                                                    | 0   |
|     | Li <sub>3</sub> BiBr <sub>6</sub>                               | N/A                                                                                                                                                                                                                                                                                    | 0   |
|     | Li <sub>3</sub> ScBr <sub>6</sub>                               | 0.4706 Li <sub>3</sub> ScBr <sub>6</sub> + 0.5294 LiMn <sub>2</sub> O <sub>4</sub> → 1.941 LiBr + 0.3529 Mn <sub>3</sub> O <sub>4</sub> + 0.8824 Br + 0.2353 Sc <sub>2</sub> O <sub>3</sub>                                                                                            | 63  |
|     | Li <sub>3</sub> LuBr <sub>6</sub>                               | 0.5556 LiMn <sub>2</sub> O <sub>4</sub> + 0.4444 Li <sub>3</sub> LuBr <sub>6</sub> → 0.2222 Mn <sub>3</sub> O <sub>4</sub> + 0.4444 LuMnO <sub>3</sub> + 1.889 LiBr + 0.7778 Br                                                                                                        | 63  |
|     | Li <sub>3</sub> TmBr <sub>6</sub>                               | 0.4444 Li <sub>3</sub> TmBr <sub>6</sub> + 0.5556 LiMn <sub>2</sub> O <sub>4</sub> → 0.2222 Mn <sub>3</sub> O <sub>4</sub> + 0.4444 TmMnO <sub>3</sub> + 1.889 LiBr + 0.7778 Br                                                                                                        | 58  |
|     | Li <sub>3</sub> ErBr <sub>6</sub>                               | 0.4444 Li <sub>3</sub> ErBr <sub>6</sub> + 0.5556 LiMn <sub>2</sub> O <sub>4</sub> → 0.2222 Mn <sub>3</sub> O <sub>4</sub> + 0.4444 ErMnO <sub>3</sub> + 1.889 LiBr + 0.7778 Br                                                                                                        | 53  |
|     | Li <sub>3</sub> YBr <sub>6</sub>                                | 0.6364 LiMn <sub>2</sub> O <sub>4</sub> + 0.3636 Li <sub>3</sub> YBr <sub>6</sub> → 0.3636 YMn <sub>2</sub> O <sub>5</sub> + 1.727 LiBr + 0.1818 Mn <sub>3</sub> O <sub>4</sub> + 0.4545 Br                                                                                            | 45  |
|     | Li <sub>3</sub> HoBr <sub>6</sub>                               | 0.3636 Li <sub>3</sub> HoBr <sub>6</sub> + 0.6364 LiMn <sub>2</sub> O <sub>4</sub> → 0.3636 HoMn <sub>2</sub> O <sub>5</sub> + 0.1818 Mn <sub>3</sub> O <sub>4</sub> + 1.727 LiBr + 0.4545 Br                                                                                          | 52  |
|     | Li <sub>3</sub> DyBr <sub>6</sub>                               | 0.3636 Li <sub>3</sub> DyBr <sub>6</sub> + 0.6364 LiMn <sub>2</sub> O <sub>4</sub> → 0.3636 DyMn <sub>2</sub> O <sub>5</sub> + 0.1818 Mn <sub>3</sub> O <sub>4</sub> + 1.727 LiBr + 0.4545 Br                                                                                          | 51  |
|     | Li <sub>3</sub> TbBr <sub>6</sub>                               | 0.6364 LiMn <sub>2</sub> O <sub>4</sub> + 0.3636 Li <sub>3</sub> TbBr <sub>6</sub> → 0.1818 Mn <sub>3</sub> O <sub>4</sub> + 0.3636 TbMn <sub>2</sub> O <sub>5</sub> + 1.727 LiBr + 0.4545 Br                                                                                          | 50  |
|     | Li <sub>3</sub> ScI <sub>6</sub>                                | 0.4286 LiMn <sub>2</sub> O <sub>4</sub> + 0.5714 Li <sub>3</sub> ScI <sub>6</sub> → 0.8571 MnO + 2.143 LiI + 0.2857 Sc <sub>2</sub> O <sub>3</sub> + 1.286 I                                                                                                                           | 134 |
|     | Li <sub>3</sub> LuI <sub>6</sub>                                | 0.5 LiMn <sub>2</sub> O <sub>4</sub> + 0.5 Li <sub>3</sub> LuI <sub>6</sub> → 0.5 LuMnO <sub>3</sub> + 2 LiI + 0.5 MnO + I                                                                                                                                                             | 129 |
|     | Li <sub>3</sub> TmI <sub>6</sub>                                | 0.5556 LiMn <sub>2</sub> O <sub>4</sub> + 0.4444 Li <sub>3</sub> TmI <sub>6</sub> → 0.2222 Mn <sub>3</sub> O <sub>4</sub> + 0.4444 TmMnO <sub>3</sub> + 1.889 LiI + 0.7778 I                                                                                                           | 122 |
|     | Li <sub>3</sub> ErI <sub>6</sub>                                | 0.4444 Li <sub>3</sub> ErI <sub>6</sub> + 0.5556 LiMn <sub>2</sub> O <sub>4</sub> → 0.2222 Mn <sub>3</sub> O <sub>4</sub> + 0.4444 ErMnO <sub>3</sub> + 1.889 LiI + 0.7778 I                                                                                                           | 116 |
|     | Li <sub>3</sub> HoI <sub>6</sub>                                | 0.5714 Li <sub>3</sub> HoI <sub>6</sub> + 0.4286 LiMn <sub>2</sub> O <sub>4</sub> → 0.2857 Mn <sub>3</sub> O <sub>4</sub> + 2.143 LiI + 0.5714 HoIO + 0.7143 I                                                                                                                         | 109 |
|     | Li <sub>3</sub> DyI <sub>6</sub>                                | 0.4444 Li <sub>3</sub> DyI <sub>6</sub> + 0.5556 LiMn <sub>2</sub> O <sub>4</sub> → 0.2222 Mn <sub>3</sub> O <sub>4</sub> + 0.4444 DyMnO <sub>3</sub> + 1.889 LiI + 0.7778 I                                                                                                           | 108 |
|     | Li <sub>3</sub> TbI <sub>6</sub>                                | 0.4444 Li <sub>3</sub> TbI <sub>6</sub> + 0.5556 LiMn <sub>2</sub> O <sub>4</sub> → 0.2222 Mn <sub>3</sub> O <sub>4</sub> + 0.4444 TbMnO <sub>3</sub> + 1.889 LiI + 0.7778 I                                                                                                           | 99  |
|     | Li <sub>3</sub> SmI <sub>6</sub>                                | 0.4286 LiMn <sub>2</sub> O <sub>4</sub> + 0.5714 Li <sub>3</sub> SmI <sub>6</sub> → 0.2857 Mn <sub>3</sub> O <sub>4</sub> + 2.143 LiI + 0.5714 SmIO + 0.7143 I                                                                                                                         | 99  |
|     | Li <sub>3</sub> PS <sub>4</sub>                                 | 0.3143 Li <sub>3</sub> PS <sub>4</sub> + 0.6857 LiNiO <sub>2</sub> → 0.02857 Li <sub>2</sub> SO <sub>4</sub> + 0.2286 Ni <sub>3</sub> S <sub>4</sub> + 0.3143 Li <sub>2</sub> S + 0.3143 Li <sub>3</sub> PO <sub>4</sub>                                                               | 525 |
|     | Li <sub>10</sub> GeP <sub>2</sub> S <sub>12</sub>               | 0.08861 Li <sub>10</sub> Ge(PS <sub>6</sub> ) <sub>2</sub> + 0.9114 LiNiO <sub>2</sub> → 0.08861 Li <sub>4</sub> GeO <sub>4</sub> + 0.3038 Ni <sub>3</sub> S <sub>2</sub> + 0.1899 Li <sub>2</sub> SO <sub>4</sub> + 0.2658 Li <sub>2</sub> S + 0.1772 Li <sub>3</sub> PO <sub>4</sub> | 470 |
|     | Li <sub>6</sub> PS <sub>5</sub> Cl                              | 0.2258 Li <sub>6</sub> PS <sub>5</sub> Cl + 0.7742 LiNiO <sub>2</sub> → 0.4516 Li <sub>2</sub> S + 0.2258 Li <sub>3</sub> PO <sub>4</sub> + 0.2581 Ni <sub>3</sub> S <sub>2</sub> + 0.2258 LiCl + 0.1613 Li <sub>2</sub> SO <sub>4</sub>                                               | 465 |
| LNO | Li <sub>7</sub> La <sub>3</sub> Zr <sub>2</sub> O <sub>12</sub> | Li <sub>7</sub> La <sub>3</sub> Zr <sub>2</sub> O <sub>12</sub> → Li <sub>7</sub> La <sub>3</sub> Zr <sub>2</sub> O <sub>12</sub>                                                                                                                                                      | 0   |
|     | LiGaO <sub>2</sub>                                              | LiGaO <sub>2</sub> → LiGaO <sub>2</sub>                                                                                                                                                                                                                                                | 0   |
|     | Li <sub>2</sub> La <sub>2</sub> Ti <sub>3</sub> O <sub>10</sub> | Li <sub>2</sub> La <sub>2</sub> Ti <sub>3</sub> O <sub>10</sub> → La <sub>2</sub> Ti <sub>2</sub> O <sub>7</sub> + Li <sub>2</sub> TiO <sub>3</sub>                                                                                                                                    | 20  |
|     | Li <sub>3</sub> InCl <sub>6</sub>                               | 0.25 Li <sub>3</sub> InCl <sub>6</sub> + 0.75 LiNiO <sub>2</sub> → 0.09375 LiClO <sub>4</sub> + 0.125 In <sub>2</sub> O <sub>3</sub> + 1.406 LiCl + 0.75 NiO                                                                                                                           | 71  |
|     | Li <sub>3</sub> BiCl <sub>6</sub>                               | 0.6667 LiNiO <sub>2</sub> + 0.3333 Li <sub>3</sub> BiCl <sub>6</sub> → 0.08333 LiClO <sub>4</sub> + 0.3333 BiClO + 0.6667 NiO + 1.583 LiCl                                                                                                                                             | 78  |
|     | Li <sub>3</sub> ScCl <sub>6</sub>                               | 0.25 Li <sub>3</sub> ScCl <sub>6</sub> + 0.75 LiNiO <sub>2</sub> → 0.09375 LiClO <sub>4</sub> + 0.75 NiO + 1.406 LiCl + 0.125 Sc <sub>2</sub> O <sub>3</sub>                                                                                                                           | 116 |

|                                                            |                                                                                                                                                                                                                                           |     |
|------------------------------------------------------------|-------------------------------------------------------------------------------------------------------------------------------------------------------------------------------------------------------------------------------------------|-----|
| $\text{Li}_3\text{LuCl}_6$                                 | $0.25 \text{Li}_3\text{LuCl}_6 + 0.75 \text{LiNiO}_2 \rightarrow 0.09375 \text{LiClO}_4 + 0.75 \text{NiO} + 1.406 \text{LiCl} + 0.125 \text{Lu}_2\text{O}_3$                                                                              | 114 |
| $\text{Li}_3\text{TmCl}_6$                                 | $0.25 \text{Li}_3\text{TmCl}_6 + 0.75 \text{LiNiO}_2 \rightarrow 0.09375 \text{LiClO}_4 + 0.75 \text{NiO} + 1.406 \text{LiCl} + 0.125 \text{Tm}_2\text{O}_3$                                                                              | 101 |
| $\text{Li}_3\text{ErCl}_6$                                 | $0.75 \text{LiNiO}_2 + 0.25 \text{Li}_3\text{ErCl}_6 \rightarrow 0.09375 \text{LiClO}_4 + 0.75 \text{NiO} + 1.406 \text{LiCl} + 0.125 \text{Er}_2\text{O}_3$                                                                              | 102 |
| $\text{Li}_3\text{YCl}_6$                                  | $0.3333 \text{Li}_3\text{YCl}_6 + 0.6667 \text{LiNiO}_2 \rightarrow 0.08333 \text{LiClO}_4 + 0.3333 \text{YClO} + 0.6667 \text{NiO} + 1.583 \text{LiCl}$                                                                                  | 82  |
| $\text{Li}_3\text{HoCl}_6$                                 | $0.25 \text{Li}_3\text{HoCl}_6 + 0.75 \text{LiNiO}_2 \rightarrow 0.09375 \text{LiClO}_4 + 0.75 \text{NiO} + 1.406 \text{LiCl} + 0.125 \text{Ho}_2\text{O}_3$                                                                              | 101 |
| $\text{Li}_3\text{DyCl}_6$                                 | $0.3333 \text{Li}_3\text{DyCl}_6 + 0.6667 \text{LiNiO}_2 \rightarrow 0.08333 \text{LiClO}_4 + 0.3333 \text{DyClO} + 0.6667 \text{NiO} + 1.583 \text{LiCl}$                                                                                | 94  |
| $\text{Li}_3\text{TbCl}_6$                                 | $0.75 \text{LiNiO}_2 + 0.25 \text{Li}_3\text{TbCl}_6 \rightarrow 0.09375 \text{LiClO}_4 + 0.75 \text{NiO} + 1.406 \text{LiCl} + 0.125 \text{Tb}_2\text{O}_3$                                                                              | 86  |
| $\text{Li}_3\text{SmCl}_6$                                 | $0.6667 \text{LiNiO}_2 + 0.3333 \text{Li}_3\text{SmCl}_6 \rightarrow 0.08333 \text{LiClO}_4 + 0.3333 \text{SmClO} + 0.6667 \text{NiO} + 1.583 \text{LiCl}$                                                                                | 95  |
| $\text{Li}_2\text{ZrCl}_6$                                 | $0.5714 \text{LiNiO}_2 + 0.4286 \text{Li}_2\text{ZrCl}_6 \rightarrow 0.07143 \text{LiClO}_4 + 0.5714 \text{NiCl}_2 + 1.357 \text{LiCl} + 0.4286 \text{ZrO}_2$                                                                             | 157 |
| $\text{Li}_{2.5}\text{In}_{0.5}\text{Zr}_{0.5}\text{Cl}_6$ | $0.2222 \text{Li}_{2.5}\text{Zr}_{0.5}\text{In}_{0.5}\text{Cl}_6 + 0.7778 \text{LiNiO}_2 \rightarrow 0.09722 \text{LiClO}_4 + 0.7778 \text{NiO} + 0.05556 \text{In}_2\text{O}_3 + 1.236 \text{LiCl} + 0.1111 \text{ZrO}_2$                | 115 |
| $\text{Li}_{2.5}\text{Sc}_{0.5}\text{Zr}_{0.5}\text{Cl}_6$ | $0.2222 \text{Li}_{2.5}\text{Zr}_{0.5}\text{Sc}_{0.5}\text{Cl}_6 + 0.7778 \text{LiNiO}_2 \rightarrow 0.09722 \text{LiClO}_4 + 0.7778 \text{NiO} + 0.05556 \text{Sc}_2\text{O}_3 + 1.236 \text{LiCl} + 0.1111 \text{ZrO}_2$                | 134 |
| $\text{Li}_{2.5}\text{Y}_{0.5}\text{Zr}_{0.5}\text{Cl}_6$  | $0.25 \text{Li}_{2.5}\text{Y}_{0.5}\text{Zr}_{0.5}\text{Cl}_6 + 0.75 \text{LiNiO}_2 \rightarrow 0.09375 \text{LiClO}_4 + 0.75 \text{NiO} + 1.281 \text{LiCl} + 0.125 \text{YClO} + 0.125 \text{ZrO}_2$                                    | 124 |
| $\text{Li}_{2.5}\text{Er}_{0.5}\text{Zr}_{0.5}\text{Cl}_6$ | $0.7778 \text{LiNiO}_2 + 0.2222 \text{Li}_{2.5}\text{Er}_{0.5}\text{Zr}_{0.5}\text{Cl}_6 \rightarrow 0.02778 \text{Er}_4\text{Zr}_3\text{O}_{12} + 0.09722 \text{LiClO}_4 + 0.7778 \text{NiO} + 1.236 \text{LiCl} + 0.02778 \text{ZrO}_2$ | 133 |
| $\text{Li}_3\text{InCl}_3\text{Br}_3$                      | $0.25 \text{Li}_3\text{In}(\text{BrCl})_3 + 0.75 \text{LiNiO}_2 \rightarrow 0.09375 \text{LiClO}_4 + 0.75 \text{LiBr} + 0.125 \text{In}_2\text{O}_3 + 0.6563 \text{LiCl} + 0.75 \text{NiO}$                                               | 47  |
| $\text{Li}_3\text{ScCl}_3\text{Br}_3$                      | $0.5 \text{LiNiO}_2 + 0.5 \text{Li}_3\text{Sc}(\text{BrCl})_3 \rightarrow 0.5 \text{NiBr}_2 + 0.0625 \text{LiClO}_4 + 0.5 \text{LiBr} + 1.438 \text{LiCl} + 0.25 \text{Sc}_2\text{O}_3$                                                   | 112 |
| $\text{Li}_3\text{LuCl}_3\text{Br}_3$                      | $0.5 \text{Li}_3\text{Lu}(\text{BrCl})_3 + 0.5 \text{LiNiO}_2 \rightarrow 0.0625 \text{LiClO}_4 + 0.5 \text{LiBr} + 0.5 \text{NiBr}_2 + 1.438 \text{LiCl} + 0.25 \text{Lu}_2\text{O}_3$                                                   | 115 |
| $\text{Li}_3\text{TmCl}_3\text{Br}_3$                      | $0.75 \text{LiNiO}_2 + 0.25 \text{Li}_3\text{Tm}(\text{BrCl})_3 \rightarrow 0.09375 \text{LiClO}_4 + 0.75 \text{LiBr} + 0.75 \text{NiO} + 0.6562 \text{LiCl} + 0.125 \text{Tm}_2\text{O}_3$                                               | 101 |
| $\text{Li}_3\text{ErCl}_3\text{Br}_3$                      | $0.25 \text{Li}_3\text{Er}(\text{BrCl})_3 + 0.75 \text{LiNiO}_2 \rightarrow 0.09375 \text{LiClO}_4 + 0.75 \text{LiBr} + 0.75 \text{NiO} + 0.6563 \text{LiCl} + 0.125 \text{Er}_2\text{O}_3$                                               | 100 |
| $\text{Li}_3\text{YCl}_3\text{Br}_3$                       | $0.3333 \text{Li}_3\text{Y}(\text{BrCl})_3 + 0.6667 \text{LiNiO}_2 \rightarrow 0.3333 \text{YClO} + \text{LiBr} + 0.08333 \text{LiClO}_4 + 0.6667 \text{NiO} + 0.5833 \text{LiCl}$                                                        | 76  |
| $\text{Li}_3\text{HoCl}_3\text{Br}_3$                      | $0.3333 \text{Li}_3\text{Ho}(\text{BrCl})_3 + 0.6667 \text{LiNiO}_2 \rightarrow 0.3333 \text{HoBrO} + 0.08333 \text{LiClO}_4 + 0.6667 \text{LiBr} + 0.6667 \text{NiO} + 0.9167 \text{LiCl}$                                               | 99  |
| $\text{Li}_3\text{DyCl}_3\text{Br}_3$                      | $0.6667 \text{LiNiO}_2 + 0.3333 \text{Li}_3\text{Dy}(\text{BrCl})_3 \rightarrow 0.08333 \text{LiClO}_4 + 0.3333 \text{DyClO} + \text{LiBr} + 0.6667 \text{NiO} + 0.5833 \text{LiCl}$                                                      | 94  |
| $\text{Li}_3\text{TbCl}_3\text{Br}_3$                      | $0.25 \text{Li}_3\text{Tb}(\text{BrCl})_3 + 0.75 \text{LiNiO}_2 \rightarrow 0.09375 \text{LiClO}_4 + 0.75 \text{LiBr} + 0.75 \text{NiO} + 0.6563 \text{LiCl} + 0.125 \text{Tb}_2\text{O}_3$                                               | 86  |
| $\text{Li}_3\text{InBr}_6$                                 | $0.2941 \text{Li}_3\text{InBr}_6 + 0.7059 \text{LiNiO}_2 \rightarrow 0.08824 \text{Br}_2\text{O}_3 + 0.1471 \text{In}_2\text{O}_3 + 1.588 \text{LiBr} + 0.7059 \text{NiO}$                                                                | 41  |
| $\text{Li}_3\text{BiBr}_6$                                 | $0.6154 \text{LiNiO}_2 + 0.3846 \text{Li}_3\text{BiBr}_6 \rightarrow 0.3846 \text{BiBrO} + 0.07692 \text{Br}_2\text{O}_3 + 1.769 \text{LiBr} + 0.6154 \text{NiO}$                                                                         | 22  |
| $\text{Li}_3\text{ScBr}_6$                                 | $0.48 \text{LiNiO}_2 + 0.52 \text{Li}_3\text{ScBr}_6 \rightarrow 2.04 \text{LiBr} + 0.06 \text{Br}_2\text{O}_3 + 0.48 \text{NiBr}_2 + 0.26 \text{Sc}_2\text{O}_3$                                                                         | 124 |
| $\text{Li}_3\text{LuBr}_6$                                 | $0.52 \text{Li}_3\text{LuBr}_6 + 0.48 \text{LiNiO}_2 \rightarrow 2.04 \text{LiBr} + 0.06 \text{Br}_2\text{O}_3 + 0.48 \text{NiBr}_2 + 0.26 \text{Lu}_2\text{O}_3$                                                                         | 110 |

|        |                                                  |                                                                                                                                                                                                                                                                                                                                   |     |
|--------|--------------------------------------------------|-----------------------------------------------------------------------------------------------------------------------------------------------------------------------------------------------------------------------------------------------------------------------------------------------------------------------------------|-----|
|        | $\text{Li}_3\text{TmBr}_6$                       | $0.48 \text{ LiNiO}_2 + 0.52 \text{ Li}_3\text{TmBr}_6 \rightarrow 2.04 \text{ LiBr} + 0.06 \text{ Br}_2\text{O}_3 + 0.48 \text{ NiBr}_2 + 0.26 \text{ Tm}_2\text{O}_3$                                                                                                                                                           | 99  |
|        | $\text{Li}_3\text{ErBr}_6$                       | $0.3846 \text{ Li}_3\text{ErBr}_6 + 0.6154 \text{ LiNiO}_2 \rightarrow 0.07692 \text{ Br}_2\text{O}_3 + 0.6154 \text{ NiO} + 1.769 \text{ LiBr} + 0.3846 \text{ ErBrO}$                                                                                                                                                           | 87  |
|        | $\text{Li}_3\text{YBr}_6$                        | $0.3846 \text{ Li}_3\text{YBr}_6 + 0.6154 \text{ LiNiO}_2 \rightarrow 0.3846 \text{ YBrO} + 1.769 \text{ LiBr} + 0.07692 \text{ Br}_2\text{O}_3 + 0.6154 \text{ NiO}$                                                                                                                                                             | 81  |
|        | $\text{Li}_3\text{HoBr}_6$                       | $0.619 \text{ Li}_3\text{HoBr}_6 + 0.381 \text{ LiNiO}_2 \rightarrow 0.619 \text{ HoBrO} + 2.238 \text{ LiBr} + 0.04762 \text{ Br}_2\text{O}_3 + 0.381 \text{ NiBr}_2$                                                                                                                                                            | 92  |
|        | $\text{Li}_3\text{DyBr}_6$                       | $0.7059 \text{ LiNiO}_2 + 0.2941 \text{ Li}_3\text{DyBr}_6 \rightarrow 1.588 \text{ LiBr} + 0.08824 \text{ Br}_2\text{O}_3 + 0.7059 \text{ NiO} + 0.1471 \text{ Dy}_2\text{O}_3$                                                                                                                                                  | 81  |
|        | $\text{Li}_3\text{TbBr}_6$                       | $0.7059 \text{ LiNiO}_2 + 0.2941 \text{ Li}_3\text{TbBr}_6 \rightarrow 1.588 \text{ LiBr} + 0.08824 \text{ Br}_2\text{O}_3 + 0.7059 \text{ NiO} + 0.1471 \text{ Tb}_2\text{O}_3$                                                                                                                                                  | 78  |
|        | $\text{Li}_3\text{ScI}_6$                        | $0.5455 \text{ LiNiO}_2 + 0.4545 \text{ Li}_3\text{ScI}_6 \rightarrow 0.5455 \text{ NiI}_2 + 0.06818 \text{ Li}_5\text{IO}_6 + 1.568 \text{ LiI} + 0.2273 \text{ Sc}_2\text{O}_3$                                                                                                                                                 | 198 |
|        | $\text{Li}_3\text{LuI}_6$                        | $0.4545 \text{ Li}_3\text{LuI}_6 + 0.5455 \text{ LiNiO}_2 \rightarrow 0.5455 \text{ NiI}_2 + 0.06818 \text{ Li}_5\text{IO}_6 + 1.568 \text{ LiI} + 0.2273 \text{ Lu}_2\text{O}_3$                                                                                                                                                 | 192 |
|        | $\text{Li}_3\text{TmI}_6$                        | $0.5455 \text{ LiNiO}_2 + 0.4545 \text{ Li}_3\text{TmI}_6 \rightarrow 0.5455 \text{ NiI}_2 + 0.06818 \text{ Li}_5\text{IO}_6 + 1.568 \text{ LiI} + 0.2273 \text{ Tm}_2\text{O}_3$                                                                                                                                                 | 179 |
|        | $\text{Li}_3\text{ErI}_6$                        | $0.1429 \text{ Li}_3\text{ErI}_6 + 0.8571 \text{ LiNiO}_2 \rightarrow 0.1071 \text{ Li}_5\text{IO}_6 + 0.8571 \text{ NiO} + 0.75 \text{ LiI} + 0.07143 \text{ Er}_2\text{O}_3$                                                                                                                                                    | 174 |
|        | $\text{Li}_3\text{HoI}_6$                        | $0.1429 \text{ Li}_3\text{HoI}_6 + 0.8571 \text{ LiNiO}_2 \rightarrow 0.1071 \text{ Li}_5\text{IO}_6 + 0.8571 \text{ NiO} + 0.75 \text{ LiI} + 0.07143 \text{ Ho}_2\text{O}_3$                                                                                                                                                    | 170 |
|        | $\text{Li}_3\text{DyI}_6$                        | $0.8571 \text{ LiNiO}_2 + 0.1429 \text{ Li}_3\text{DyI}_6 \rightarrow 0.1071 \text{ Li}_5\text{IO}_6 + 0.8571 \text{ NiO} + 0.75 \text{ LiI} + 0.07143 \text{ Dy}_2\text{O}_3$                                                                                                                                                    | 167 |
|        | $\text{Li}_3\text{TbI}_6$                        | $0.1429 \text{ Li}_3\text{TbI}_6 + 0.8571 \text{ LiNiO}_2 \rightarrow 0.1071 \text{ Li}_5\text{IO}_6 + 0.8571 \text{ NiO} + 0.75 \text{ LiI} + 0.07143 \text{ Tb}_2\text{O}_3$                                                                                                                                                    | 164 |
|        | $\text{Li}_3\text{SmI}_6$                        | $0.8571 \text{ LiNiO}_2 + 0.1429 \text{ Li}_3\text{SmI}_6 \rightarrow 0.1071 \text{ Li}_5\text{IO}_6 + 0.8571 \text{ NiO} + 0.75 \text{ LiI} + 0.07143 \text{ Sm}_2\text{O}_3$                                                                                                                                                    | 153 |
|        | $\text{Li}_3\text{PS}_4$                         | $0.4 \text{ Li}_3\text{MnCoNiO}_6 + 0.6 \text{ Li}_3\text{PS}_4 \rightarrow 0.1333 \text{ Co}(\text{NiS}_2)_2 + 0.1333 \text{ Li}(\text{MnS}_2)_2 + 0.1333 \text{ Co}_2\text{NiS}_4 + 0.1333 \text{ MnS}_2 + 0.5333 \text{ Li}_2\text{S} + 0.6 \text{ Li}_3\text{PO}_4$                                                           | 399 |
|        | $\text{Li}_{10}\text{GeP}_2\text{S}_{12}$        | $0.6783 \text{ Li}_3\text{MnCoNiO}_6 + 0.3217 \text{ Li}_{10}\text{Ge}(\text{PS}_6)_2 \rightarrow 0.2261 \text{ Co}(\text{NiS}_2)_2 + 0.3217 \text{ Li}_2\text{MnGeO}_4 + 0.05217 \text{ Li}_2\text{SO}_4 + 0.2261 \text{ Co}_2\text{NiS}_4 + 0.3565 \text{ MnS}_2 + 1.287 \text{ Li}_2\text{S} + 0.6435 \text{ Li}_3\text{PO}_4$ | 333 |
|        | $\text{Li}_6\text{PS}_5\text{Cl}$                | $0.6 \text{ Li}_6\text{PS}_5\text{Cl} + 0.4 \text{ Li}_3\text{MnCoNiO}_6 \rightarrow 0.1333 \text{ Co}(\text{NiS}_2)_2 + 0.1333 \text{ Li}(\text{MnS}_2)_2 + 0.1333 \text{ Co}_2\text{NiS}_4 + 0.1333 \text{ MnS}_2 + 1.133 \text{ Li}_2\text{S} + 0.6 \text{ LiCl} + 0.6 \text{ Li}_3\text{PO}_4$                                | 357 |
|        | $\text{Li}_7\text{La}_3\text{Zr}_2\text{O}_{12}$ | $0.4 \text{ Li}_7\text{La}_3\text{Zr}_2\text{O}_{12} + 0.6 \text{ Li}_3\text{MnCoNiO}_6 \rightarrow 0.2 \text{ LiNiO}_2 + 0.4 \text{ Li}_5\text{NiO}_4 + 0.4 \text{ Li}_6\text{Zr}_2\text{O}_7 + 0.6 \text{ La}_2\text{MnCoO}_6$                                                                                                  | 112 |
|        | $\text{LiGaO}_2$                                 | $\text{Li}_3\text{MnCoNiO}_6 \rightarrow \text{LiCoO}_2 + \text{Li}_2\text{MnO}_3 + \text{NiO}$                                                                                                                                                                                                                                   | 49  |
| NMC111 | $\text{Li}_2\text{La}_2\text{Ti}_3\text{O}_{10}$ | $0.5 \text{ Li}_3\text{MnCoNiO}_6 + 0.5 \text{ Li}_2\text{La}_2\text{Ti}_3\text{O}_{10} \rightarrow 0.02828 \text{ Ti}_4(\text{Ni}_5\text{O}_8)_3 + 0.02956 \text{ LiO}_8 + 0.07584 \text{ Li}_2\text{Ti}_3\text{NiO}_8 + 1.159 \text{ Li}_2\text{TiO}_3 + 0.5 \text{ La}_2\text{MnCoO}_6$                                        | 127 |
|        | $\text{Li}_3\text{InCl}_6$                       | $0.6261 \text{ Li}_3\text{MnCoNiO}_6 + 0.3739 \text{ Li}_3\text{InCl}_6 \rightarrow 0.1435 \text{ Li}_2\text{Mn}_3\text{NiO}_8 + 0.1174 \text{ Li}_4\text{MnCo}_5\text{O}_{12} + 0.03913 \text{ Mn}_2\text{CoO}_4 + 0.187 \text{ In}_2\text{O}_3 + 2.243 \text{ LiCl} + 0.4826 \text{ NiO}$                                       | 63  |
|        | $\text{Li}_3\text{BiCl}_6$                       | $0.5275 \text{ Li}_3\text{MnCoNiO}_6 + 0.4725 \text{ Li}_3\text{BiCl}_6 \rightarrow 0.1209 \text{ Li}_2\text{Mn}_3\text{NiO}_8 + 0.0989 \text{ Li}_4\text{MnCo}_5\text{O}_{12} + 0.03297 \text{ Mn}_2\text{CoO}_4 + 0.4066 \text{ NiO} + 0.4725 \text{ BiClO} + 2.363 \text{ LiCl}$                                               | 70  |
|        | $\text{Li}_3\text{ScCl}_6$                       | $0.6145 \text{ Li}_3\text{MnCoNiO}_6 + 0.3855 \text{ Li}_3\text{ScCl}_6 \rightarrow 0.08358 \text{ Mn}(\text{Ni}_3\text{O}_4)_2 + 0.0384 \text{ Mn}_2\text{CoO}_4 + 0.113 \text{ Li}_2\text{Mn}_3\text{NiO}_8 + 0.1152 \text{ Li}_4\text{MnCo}_5\text{O}_{12} + 2.313 \text{ LiCl} + 0.1928 \text{ Sc}_2\text{O}_3$               | 97  |
|        | $\text{Li}_3\text{LuCl}_6$                       | $0.5769 \text{ Li}_3\text{MnCoNiO}_6 + 0.4231 \text{ Li}_3\text{LuCl}_6 \rightarrow 0.03846 \text{ Mn}(\text{Ni}_3\text{O}_4)_2 + 0.1154 \text{ LuMnO}_3 + 0.1538 \text{ Lu}_2\text{Mn}_2\text{O}_7 + 0.1154 \text{ Li}_4\text{MnCo}_5\text{O}_{12} + 2.538 \text{ LiCl} + 0.3462 \text{ NiO}$                                    | 100 |



|                                                            |                                                                                                                         |     |
|------------------------------------------------------------|-------------------------------------------------------------------------------------------------------------------------|-----|
|                                                            | $0.5769 \text{ Li}_3\text{MnCoNiO}_6 + 0.4231 \text{ Li}_3\text{TmCl}_6 \rightarrow 0.1154$                             |     |
| $\text{Li}_3\text{TmCl}_6$                                 | $\text{Li}_4\text{MnCo}_5\text{O}_{12} + 0.03846 \text{ Mn}(\text{Ni}_3\text{O}_4)_2 + 0.1154 \text{ TmMnO}_3$          | 91  |
|                                                            | $+ 0.1538 \text{ Tm}_2\text{Mn}_2\text{O}_7 + 2.538 \text{ LiCl} + 0.3462 \text{ NiO}$                                  |     |
|                                                            | $0.5769 \text{ Li}_3\text{MnCoNiO}_6 + 0.4231 \text{ Li}_3\text{ErCl}_6 \rightarrow 0.1154$                             |     |
| $\text{Li}_3\text{ErCl}_6$                                 | $\text{ErMn}_2\text{O}_5 + 0.1154 \text{ Li}_4\text{MnCo}_5\text{O}_{12} + 0.1154 \text{ Er}_2\text{Mn}_2\text{O}_7 +$  | 90  |
|                                                            | $0.03846 \text{ Er}_2\text{O}_3 + 2.538 \text{ LiCl} + 0.5769 \text{ NiO}$                                              |     |
|                                                            | $0.5882 \text{ Li}_3\text{MnCoNiO}_6 + 0.4118 \text{ Li}_3\text{YCl}_6 \rightarrow 0.02941$                             |     |
| $\text{Li}_3\text{YCl}_6$                                  | $\text{Li}_2\text{Mn}_3\text{NiO}_8 + 0.1176 \text{ Li}_4\text{MnCo}_5\text{O}_{12} + 0.1471 \text{ Y}_2\text{MnNiO}_6$ | 75  |
|                                                            | $+ 0.1176 \text{ YMn}_2\text{O}_5 + 0.4118 \text{ NiO} + 2.471 \text{ LiCl}$                                            |     |
|                                                            | $0.5779 \text{ Li}_3\text{MnCoNiO}_6 + 0.4221 \text{ Li}_3\text{HoCl}_6 \rightarrow 0.002513$                           |     |
| $\text{Li}_3\text{HoCl}_6$                                 | $\text{Li}_2\text{Mn}_3\text{NiO}_8 + 0.07035 \text{ Mn}(\text{Ni}_3\text{O}_4)_2 + 0.1156 \text{ HoMn}_2\text{O}_5 +$  | 92  |
|                                                            | $0.1156 \text{ Li}_4\text{MnCo}_5\text{O}_{12} + 0.1533 \text{ Ho}_2\text{MnNiO}_6 + 2.533 \text{ LiCl}$                |     |
|                                                            | $0.4785 \text{ Li}_3\text{DyCl}_6 + 0.5215 \text{ Li}_3\text{MnCoNiO}_6 \rightarrow 0.04294$                            |     |
| $\text{Li}_3\text{DyCl}_6$                                 | $\text{Li}_2\text{Mn}_3\text{NiO}_8 + 0.1043 \text{ Li}_4\text{MnCo}_5\text{O}_{12} + 0.1043 \text{ DyMn}_2\text{O}_5$  | 84  |
|                                                            | $+ 0.07975 \text{ Mn}(\text{Ni}_3\text{O}_4)_2 + 2.497 \text{ LiCl} + 0.3742 \text{ DyClO}$                             |     |
|                                                            | $0.5779 \text{ Li}_3\text{MnCoNiO}_6 + 0.4221 \text{ Li}_3\text{TbCl}_6 \rightarrow 0.1156$                             |     |
| $\text{Li}_3\text{TbCl}_6$                                 | $\text{TbMn}_2\text{O}_5 + 0.07035 \text{ Mn}(\text{Ni}_3\text{O}_4)_2 + 0.1533 \text{ Tb}_2\text{MnNiO}_6 +$           | 81  |
|                                                            | $0.002513 \text{ Li}_2\text{Mn}_3\text{NiO}_8 + 0.1156 \text{ Li}_4\text{MnCo}_5\text{O}_{12} + 2.533$                  |     |
|                                                            | $\text{LiCl}$                                                                                                           |     |
|                                                            | $0.5152 \text{ Li}_3\text{MnCoNiO}_6 + 0.4848 \text{ Li}_3\text{SmCl}_6 \rightarrow 0.0322$                             |     |
| $\text{Li}_3\text{SmCl}_6$                                 | $\text{Mn}_2\text{CoO}_4 + 0.0947 \text{ Li}_2\text{Mn}_3\text{NiO}_8 + 0.07008 \text{ Mn}(\text{Ni}_3\text{O}_4)_2 +$  | 83  |
|                                                            | $0.09659 \text{ Li}_4\text{MnCo}_5\text{O}_{12} + 2.424 \text{ LiCl} + 0.4848 \text{ SmClO}$                            |     |
|                                                            | $0.5455 \text{ Li}_3\text{MnCoNiO}_6 + 0.4545 \text{ Li}_2\text{ZrCl}_6 \rightarrow 0.125$                              |     |
| $\text{Li}_2\text{ZrCl}_6$                                 | $\text{Li}_2\text{Mn}_3\text{NiO}_8 + 0.1023 \text{ Li}_4\text{MnCo}_5\text{O}_{12} + 0.03409 \text{ Mn}_2\text{CoO}_4$ | 124 |
|                                                            | $+ 0.4205 \text{ NiCl}_2 + 1.886 \text{ LiCl} + 0.4545 \text{ ZrO}_2$                                                   |     |
|                                                            | $0.6145 \text{ Li}_3\text{MnCoNiO}_6 + 0.3855 \text{ Li}_{2.5}\text{Zr}_{0.5}\text{In}_{0.5}\text{Cl}_6 \rightarrow$    |     |
| $\text{Li}_{2.5}\text{In}_{0.5}\text{Zr}_{0.5}\text{Cl}_6$ | $0.1152 \text{ Li}_4\text{MnCo}_5\text{O}_{12} + 0.1928 \text{ InClO} + 0.08358$                                        | 91  |
|                                                            | $\text{Mn}(\text{Ni}_3\text{O}_4)_2 + 0.113 \text{ Li}_2\text{Mn}_3\text{NiO}_8 + 0.0384 \text{ Mn}_2\text{CoO}_4 +$    |     |
|                                                            | $2.12 \text{ LiCl} + 0.1928 \text{ ZrO}_2$                                                                              |     |
|                                                            | $0.6503 \text{ Li}_3\text{MnCoNiO}_6 + 0.3497 \text{ Li}_{2.5}\text{Zr}_{0.5}\text{Sc}_{0.5}\text{Cl}_6 \rightarrow$    |     |
| $\text{Li}_{2.5}\text{Sc}_{0.5}\text{Zr}_{0.5}\text{Cl}_6$ | $0.08846 \text{ Mn}(\text{Ni}_3\text{O}_4)_2 + 0.1195 \text{ Li}_2\text{Mn}_3\text{NiO}_8 + 0.1219$                     | 104 |
|                                                            | $\text{Li}_4\text{MnCo}_5\text{O}_{12} + 0.04064 \text{ Mn}_2\text{CoO}_4 + 0.1749 \text{ ZrO}_2 +$                     |     |
|                                                            | $2.098 \text{ LiCl} + 0.08743 \text{ Sc}_2\text{O}_3$                                                                   |     |
|                                                            | $0.6204 \text{ Li}_3\text{MnCoNiO}_6 + 0.3796 \text{ Li}_{2.5}\text{Y}_{0.5}\text{Zr}_{0.5}\text{Cl}_6 \rightarrow$     |     |
| $\text{Li}_{2.5}\text{Y}_{0.5}\text{Zr}_{0.5}\text{Cl}_6$  | $0.05109 \text{ Li}_2\text{Mn}_3\text{NiO}_8 + 0.1241 \text{ Li}_4\text{MnCo}_5\text{O}_{12} + 0.1241$                  | 100 |
|                                                            | $\text{YMn}_2\text{O}_5 + 0.09489 \text{ Mn}(\text{Ni}_3\text{O}_4)_2 + 0.1898 \text{ ZrO}_2 + 0.06569$                 |     |
|                                                            | $\text{YClO} + 2.212 \text{ LiCl}$                                                                                      |     |
|                                                            | $0.4545 \text{ Li}_3\text{MnCoNiO}_6 + 0.5455 \text{ Li}_{2.5}\text{Er}_{0.5}\text{Zr}_{0.5}\text{Cl}_6 \rightarrow$    |     |
| $\text{Li}_{2.5}\text{Er}_{0.5}\text{Zr}_{0.5}\text{Cl}_6$ | $0.09091 \text{ Er}_2\text{Mn}_2\text{O}_7 + 0.2727 \text{ ZrO}_2 + 0.09091 \text{ ErMn}_2\text{O}_5 +$                 | 107 |
|                                                            | $0.09091 \text{ Li}_4\text{MnCo}_5\text{O}_{12} + 0.4545 \text{ NiCl}_2 + 2.364 \text{ LiCl}$                           |     |
|                                                            | $\text{Li}_3\text{MnCoNiO}_6 \rightarrow \text{LiCoO}_2 + \text{Li}_2\text{MnO}_3 + \text{NiO}$                         | 49  |
| $\text{Li}_3\text{InCl}_3\text{Br}_3$                      |                                                                                                                         |     |
|                                                            | $0.4737 \text{ Li}_3\text{MnCoNiO}_6 + 0.5263 \text{ Li}_3\text{Sc}(\text{BrCl})_3 \rightarrow 0.08882$                 |     |
| $\text{Li}_3\text{ScCl}_3\text{Br}_3$                      | $\text{Li}_4\text{MnCo}_5\text{O}_{12} + 0.02961 \text{ Mn}_2\text{CoO}_4 + 0.1086 \text{ Li}_2\text{Mn}_3\text{NiO}_8$ | 94  |
|                                                            | $+ 0.3651 \text{ NiBr}_2 + 1.579 \text{ LiCl} + 0.8487 \text{ LiBr} + 0.2632$                                           |     |
|                                                            | $\text{Sc}_2\text{O}_3$                                                                                                 |     |
|                                                            | $0.4167 \text{ Li}_3\text{MnCoNiO}_6 + 0.5833 \text{ Li}_3\text{Lu}(\text{BrCl})_3 \rightarrow 0.08333$                 |     |
| $\text{Li}_3\text{LuCl}_3\text{Br}_3$                      | $\text{Li}_4\text{MnCo}_5\text{O}_{12} + 0.08333 \text{ LuMnO}_3 + 0.125 \text{ Lu}_2\text{Mn}_2\text{O}_7 +$           | 100 |
|                                                            | $0.4167 \text{ NiBr}_2 + 0.9167 \text{ LiBr} + 1.75 \text{ LiCl} + 0.125 \text{ Lu}_2\text{O}_3$                        |     |
|                                                            | $0.3704 \text{ Li}_3\text{MnCoNiO}_6 + 0.6296 \text{ Li}_3\text{Tm}(\text{BrCl})_3 \rightarrow$                         |     |
| $\text{Li}_3\text{TmCl}_3\text{Br}_3$                      | $0.07407 \text{ TmMnO}_3 + 0.07407 \text{ Li}_4\text{MnCo}_5\text{O}_{12} + 0.1111$                                     | 89  |
|                                                            | $\text{Tm}_2\text{Mn}_2\text{O}_7 + 0.3333 \text{ TmClO} + 0.3704 \text{ NiBr}_2 + 1.556$                               |     |
|                                                            | $\text{LiCl} + 1.148 \text{ LiBr}$                                                                                      |     |
|                                                            | $0.3704 \text{ Li}_3\text{MnCoNiO}_6 + 0.6296 \text{ Li}_3\text{Er}(\text{BrCl})_3 \rightarrow 0.1111$                  |     |
| $\text{Li}_3\text{ErCl}_3\text{Br}_3$                      | $\text{Er}_2\text{Mn}_2\text{O}_7 + 0.07407 \text{ Li}_4\text{MnCo}_5\text{O}_{12} + 0.07407 \text{ ErMnO}_3 +$         | 88  |
|                                                            | $0.8148 \text{ LiBr} + 0.3704 \text{ NiBr}_2 + 0.3333 \text{ ErBrO} + 1.889$                                            |     |
|                                                            | $\text{LiCl}$                                                                                                           |     |

---

|                                                   |                                                                                                                                                                                                                                                                                                                                                                                                       |     |
|---------------------------------------------------|-------------------------------------------------------------------------------------------------------------------------------------------------------------------------------------------------------------------------------------------------------------------------------------------------------------------------------------------------------------------------------------------------------|-----|
| Li <sub>3</sub> YCl <sub>3</sub> Br <sub>3</sub>  | 0.625 Li <sub>3</sub> MnCoNiO <sub>6</sub> + 0.375 Li <sub>3</sub> Y(BrCl) <sub>3</sub> → 0.125<br>Li <sub>2</sub> MnO <sub>3</sub> + 0.125 Y <sub>2</sub> MnNiO <sub>6</sub> + 0.125 Li <sub>4</sub> MnCo <sub>5</sub> O <sub>12</sub> +<br>0.125 YMn <sub>2</sub> O <sub>5</sub> + 0.5 NiO + 1.125 LiBr + 1.125 LiCl                                                                                | 68  |
| Li <sub>3</sub> HoCl <sub>3</sub> Br <sub>3</sub> | 0.3571 Li <sub>3</sub> MnCoNiO <sub>6</sub> + 0.6429 Li <sub>3</sub> Ho(BrCl) <sub>3</sub> → 0.07143<br>Ho <sub>2</sub> Mn <sub>2</sub> O <sub>7</sub> + 0.07143 Li <sub>4</sub> MnCo <sub>5</sub> O <sub>12</sub> + 0.07143 HoMn <sub>2</sub> O <sub>5</sub><br>+ 0.7857 LiBr + 0.3571 NiBr <sub>2</sub> + 0.4286 HoBrO + 1.929<br>LiCl                                                              | 87  |
| Li <sub>3</sub> DyCl <sub>3</sub> Br <sub>3</sub> | 0.4545 Li <sub>3</sub> MnCoNiO <sub>6</sub> + 0.5455 Li <sub>3</sub> Dy(BrCl) <sub>3</sub> → 0.09091<br>DyMn <sub>2</sub> O <sub>5</sub> + 0.09091 Li <sub>4</sub> MnCo <sub>5</sub> O <sub>12</sub> + 0.09091 DyClO +<br>0.2727 NiBr <sub>2</sub> + 0.1818 Dy <sub>2</sub> MnNiO <sub>6</sub> + 1.545 LiCl + 1.091<br>LiBr                                                                           | 81  |
| Li <sub>3</sub> TbCl <sub>3</sub> Br <sub>3</sub> | 0.4221 Li <sub>3</sub> Tb(BrCl) <sub>3</sub> + 0.5779 Li <sub>3</sub> MnCoNiO <sub>6</sub> →<br>0.002513 Li <sub>2</sub> Mn <sub>3</sub> NiO <sub>8</sub> + 0.1156 Li <sub>4</sub> MnCo <sub>5</sub> O <sub>12</sub> + 0.1156<br>TbMn <sub>2</sub> O <sub>5</sub> + 0.07035 Mn(Ni <sub>3</sub> O <sub>4</sub> ) <sub>2</sub> + 0.1533 Tb <sub>2</sub> MnNiO <sub>6</sub> +<br>1.266 LiCl + 1.266 LiBr | 78  |
| Li <sub>3</sub> InBr <sub>6</sub>                 | 0.6 Li <sub>3</sub> MnCoNiO <sub>6</sub> + 0.4 Li <sub>3</sub> InBr <sub>6</sub> → 0.6 Li <sub>2</sub> MnO <sub>3</sub> + 0.6<br>LiCoO <sub>2</sub> + 0.6 NiBr <sub>2</sub> + 0.2 In <sub>2</sub> O <sub>3</sub> + 1.2 LiBr                                                                                                                                                                           | 53  |
| Li <sub>3</sub> BiBr <sub>6</sub>                 | 0.5 Li <sub>3</sub> BiBr <sub>6</sub> + 0.5 Li <sub>3</sub> MnCoNiO <sub>6</sub> → 0.5 LiCoO <sub>2</sub> + 0.5<br>Li <sub>2</sub> MnO <sub>3</sub> + 0.5 NiBr <sub>2</sub> + 0.5 BiBrO + 1.5 LiBr                                                                                                                                                                                                    | 42  |
| Li <sub>3</sub> ScBr <sub>6</sub>                 | 0.3418 Li <sub>3</sub> MnCoNiO <sub>6</sub> + 0.6582 Li <sub>3</sub> ScBr <sub>6</sub> → 0.03797<br>Li <sub>4</sub> MnCo <sub>5</sub> O <sub>12</sub> + 0.1519 Mn <sub>2</sub> CoO <sub>4</sub> + 0.3418 NiBr <sub>2</sub> + 2.848<br>LiBr + 0.4177 Br + 0.3291 Sc <sub>2</sub> O <sub>3</sub>                                                                                                        | 119 |
| Li <sub>3</sub> LuBr <sub>6</sub>                 | 0.3846 Li <sub>3</sub> MnCoNiO <sub>6</sub> + 0.6154 Li <sub>3</sub> LuBr <sub>6</sub> → 0.07692<br>Li <sub>4</sub> MnCo <sub>5</sub> O <sub>12</sub> + 0.3077 LuMnO <sub>3</sub> + 0.3846 NiBr <sub>2</sub> + 2.692<br>LiBr + 0.1538 Lu <sub>2</sub> O <sub>3</sub> + 0.2308 Br                                                                                                                      | 111 |
| Li <sub>3</sub> TmBr <sub>6</sub>                 | 0.4167 Li <sub>3</sub> MnCoNiO <sub>6</sub> + 0.5833 Li <sub>3</sub> TmBr <sub>6</sub> → 0.4167<br>NiBr <sub>2</sub> + 0.08333 Li <sub>4</sub> MnCo <sub>5</sub> O <sub>12</sub> + 0.08333 TmMnO <sub>3</sub> +<br>0.125 Tm <sub>2</sub> Mn <sub>2</sub> O <sub>7</sub> + 2.667 LiBr + 0.125 Tm <sub>2</sub> O <sub>3</sub>                                                                           | 106 |
| Li <sub>3</sub> ErBr <sub>6</sub>                 | 0.5946 Li <sub>3</sub> ErBr <sub>6</sub> + 0.4054 Li <sub>3</sub> MnCoNiO <sub>6</sub> → 0.1622<br>ErMn <sub>2</sub> O <sub>5</sub> + 0.4054 7NiBr <sub>2</sub> + 0.08108 Li <sub>4</sub> MnCo <sub>5</sub> O <sub>12</sub> +<br>2.676 LiBr + 0.2162 Er <sub>2</sub> O <sub>3</sub> + 0.08108 Br                                                                                                      | 100 |
| Li <sub>3</sub> YBr <sub>6</sub>                  | 0.3571 Li <sub>3</sub> MnCoNiO <sub>6</sub> + 0.6429 Li <sub>3</sub> YBr <sub>6</sub> → 0.07143<br>Li <sub>4</sub> MnCo <sub>5</sub> O <sub>12</sub> + 0.07143 YMn <sub>2</sub> O <sub>5</sub> + 0.07143 Y <sub>2</sub> Mn <sub>2</sub> O <sub>7</sub> +<br>0.4286 YBrO + 0.3571 NiBr <sub>2</sub> + 2.714 LiBr                                                                                       | 90  |
| Li <sub>3</sub> HoBr <sub>6</sub>                 | 0.6429 Li <sub>3</sub> HoBr <sub>6</sub> + 0.3571 Li <sub>3</sub> MnCoNiO <sub>6</sub> → 0.07143<br>HoMn <sub>2</sub> O <sub>5</sub> + 0.3571 NiBr <sub>2</sub> + 0.07143 Li <sub>4</sub> MnCo <sub>5</sub> O <sub>12</sub> +<br>0.07143 Ho <sub>2</sub> Mn <sub>2</sub> O <sub>7</sub> + 0.4286 HoBrO + 2.714 LiBr                                                                                   | 98  |
| Li <sub>3</sub> DyBr <sub>6</sub>                 | 0.5833 Li <sub>3</sub> DyBr <sub>6</sub> + 0.4167 Li <sub>3</sub> MnCoNiO <sub>6</sub> → 0.08333<br>DyMn <sub>2</sub> O <sub>5</sub> + 0.4167 NiBr <sub>2</sub> + 0.08333 Li <sub>4</sub> MnCo <sub>5</sub> O <sub>12</sub> +<br>0.08333 Dy <sub>2</sub> Mn <sub>2</sub> O <sub>7</sub> + 2.667 LiBr + 0.1667 Dy <sub>2</sub> O <sub>3</sub>                                                          | 95  |
| Li <sub>3</sub> TbBr <sub>6</sub>                 | 0.4167 Li <sub>3</sub> MnCoNiO <sub>6</sub> + 0.5833 Li <sub>3</sub> TbBr <sub>6</sub> → 0.4167<br>NiBr <sub>2</sub> + 0.08333 TbMn <sub>2</sub> O <sub>5</sub> + 0.08333 Li <sub>4</sub> MnCo <sub>5</sub> O <sub>12</sub> +<br>0.08333 Tb <sub>2</sub> Mn <sub>2</sub> O <sub>7</sub> + 2.667 LiBr + 0.1667 Tb <sub>2</sub> O <sub>3</sub>                                                          | 92  |
| Li <sub>3</sub> ScI <sub>6</sub>                  | 0.2903 Li <sub>3</sub> MnCoNiO <sub>6</sub> + 0.7097 Li <sub>3</sub> ScI <sub>6</sub> → 0.09677<br>Mn <sub>3</sub> O <sub>4</sub> + 0.2903 NiI <sub>2</sub> + 0.2903 CoO + 3 LiI + 0.3548<br>Sc <sub>2</sub> O <sub>3</sub> + 0.6774 I                                                                                                                                                                | 169 |
| Li <sub>3</sub> LuI <sub>6</sub>                  | 0.3 Li <sub>3</sub> MnCoNiO <sub>6</sub> + 0.7 Li <sub>3</sub> LuI <sub>6</sub> → 0.3 LuMnO <sub>3</sub> + 0.3<br>NiI <sub>2</sub> + 0.3 CoO + 3 LiI + 0.2 Lu <sub>2</sub> O <sub>3</sub> + 0.6 I                                                                                                                                                                                                     | 164 |
| Li <sub>3</sub> TmI <sub>6</sub>                  | 0.3 Li <sub>3</sub> MnCoNiO <sub>6</sub> + 0.7 Li <sub>3</sub> TmI <sub>6</sub> → 0.3 TmMnO <sub>3</sub> + 0.3<br>NiI <sub>2</sub> + 0.3 CoO + 3 LiI + 0.2 Tm <sub>2</sub> O <sub>3</sub> + 0.6 I                                                                                                                                                                                                     | 155 |
| Li <sub>3</sub> ErI <sub>6</sub>                  | 0.3 Li <sub>3</sub> MnCoNiO <sub>6</sub> + 0.7 Li <sub>3</sub> ErI <sub>6</sub> → 0.3 ErMnO <sub>3</sub> + 0.3<br>NiI <sub>2</sub> + 0.3 CoO + 3 LiI + 0.2 Er <sub>2</sub> O <sub>3</sub> + 0.6 I                                                                                                                                                                                                     | 147 |
| Li <sub>3</sub> HoI <sub>6</sub>                  | 0.3 Li <sub>3</sub> MnCoNiO <sub>6</sub> + 0.7 Li <sub>3</sub> HoI <sub>6</sub> → 0.15 Mn <sub>2</sub> CoO <sub>4</sub> + 0.3<br>NiI <sub>2</sub> + 0.15 CoO + 3 LiI + 0.35 Ho <sub>2</sub> O <sub>3</sub> + 0.6 I                                                                                                                                                                                    | 139 |
| Li <sub>3</sub> DyI <sub>6</sub>                  | 0.7 Li <sub>3</sub> DyI <sub>6</sub> + 0.3 Li <sub>3</sub> MnCoNiO <sub>6</sub> → 0.3 DyMnO <sub>3</sub> + 0.3<br>NiI <sub>2</sub> + 0.3 CoO + 3 LiI + 0.2 Dy <sub>2</sub> O <sub>3</sub> + 0.6 I                                                                                                                                                                                                     | 137 |

---

|        |                                                  |                                                                                                                                                                                                                                                                                                                                                 |     |
|--------|--------------------------------------------------|-------------------------------------------------------------------------------------------------------------------------------------------------------------------------------------------------------------------------------------------------------------------------------------------------------------------------------------------------|-----|
|        | $\text{Li}_3\text{TbI}_6$                        | $0.7 \text{Li}_3\text{TbI}_6 + 0.3 \text{Li}_3\text{MnCoNiO}_6 \rightarrow 0.3 \text{TbMnO}_3 + 0.3 \text{NiI}_2 + 0.3 \text{CoO} + 3 \text{LiI} + 0.2 \text{Tb}_2\text{O}_3 + 0.6 \text{I}$                                                                                                                                                    | 129 |
|        | $\text{Li}_3\text{SmI}_6$                        | $0.2222 \text{Li}_3\text{MnCoNiO}_6 + 0.7778 \text{Li}_3\text{SmI}_6 \rightarrow 0.1111 \text{Mn}_2\text{CoO}_4 + 0.2222 \text{NiI}_2 + 0.7778 \text{SmIO} + 0.1111 \text{CoO} + 3 \text{LiI} + 0.4444 \text{I}$                                                                                                                                | 121 |
|        | $\text{Li}_3\text{PS}_4$                         | $0.1667 \text{Li}_{10}\text{Mn}_3\text{Co}_2(\text{NiO}_4)_5 + 0.8333 \text{Li}_3\text{PS}_4 \rightarrow 0.3333 \text{Co}(\text{NiS}_2)_2 + 0.1111 \text{Li}(\text{MnS}_2)_2 + 0.05556 \text{Ni}_3\text{S}_4 + 0.2778 \text{MnS}_2 + 0.7778 \text{Li}_2\text{S} + 0.8333 \text{Li}_3\text{PO}_4$                                                | 396 |
|        | $\text{Li}_{10}\text{GeP}_2\text{S}_{12}$        | $0.39 \text{Li}_{10}\text{Mn}_3\text{Co}_2(\text{NiO}_4)_5 + 0.61 \text{Li}_{10}\text{Ge}(\text{PS}_6)_2 \rightarrow 0.78 \text{Co}(\text{NiS}_2)_2 + 0.61 \text{Li}_2\text{MnGeO}_4 + 0.12 \text{Li}_2\text{SO}_4 + 0.13 \text{Ni}_3\text{S}_4 + 0.56 \text{MnS}_2 + 2.44 \text{Li}_2\text{S} + 1.22 \text{Li}_3\text{PO}_4$                   | 330 |
|        | $\text{Li}_6\text{PS}_5\text{Cl}$                | $0.8333 \text{Li}_6\text{PS}_5\text{Cl} + 0.1667 \text{Li}_{10}\text{Mn}_3\text{Co}_2(\text{NiO}_4)_5 \rightarrow 0.3333 \text{Co}(\text{NiS}_2)_2 + 0.1111 \text{Li}(\text{MnS}_2)_2 + 0.05556 \text{Ni}_3\text{S}_4 + 0.2778 \text{MnS}_2 + 1.611 \text{Li}_2\text{S} + 0.8333 \text{LiCl} + 0.8333 \text{Li}_3\text{PO}_4$                   | 355 |
|        | $\text{Li}_7\text{La}_3\text{Zr}_2\text{O}_{12}$ | $0.5714 \text{Li}_7\text{La}_3\text{Zr}_2\text{O}_{12} + 0.4286 \text{Li}_{10}\text{Mn}_3\text{Co}_2(\text{NiO}_4)_5 \rightarrow 0.06015 \text{Li}_{19}\text{Ni}_2\text{O}_4 + 0.5714 \text{Li}_5\text{NiO}_4 + 0.5714 \text{Li}_6\text{Zr}_2\text{O}_7 + 0.8571 \text{La}_2\text{MnCoO}_6 + 0.4286 \text{Li}_2\text{MnO}_3 + 0.188 \text{NiO}$ | 67  |
|        | $\text{LiGaO}_2$                                 | $\text{LiGaO}_2 \rightarrow \text{LiGaO}_2$                                                                                                                                                                                                                                                                                                     | 0   |
|        | $\text{Li}_2\text{La}_2\text{Ti}_3\text{O}_{10}$ | $0.3333 \text{Li}_{10}\text{Mn}_3\text{Co}_2(\text{NiO}_4)_5 + 0.6667 \text{Li}_2\text{La}_2\text{Ti}_3\text{O}_{10} \rightarrow 0.4103 \text{Li}(\text{NiO}_2)_2 + 0.05128 \text{Ti}_4(\text{Ni}_5\text{O}_8)_3 + 1.795 \text{Li}_2\text{TiO}_3 + 0.6667 \text{La}_2\text{MnCoO}_6 + 0.3333 \text{Li}_2\text{MnO}_3 + 0.07692 \text{NiO}$      | 83  |
|        | $\text{Li}_3\text{InCl}_6$                       | $0.2955 \text{Li}_{10}\text{Mn}_3\text{Co}_2(\text{NiO}_4)_5 + 0.7045 \text{Li}_3\text{InCl}_6 \rightarrow 0.2155 \text{Mn}(\text{Ni}_3\text{O}_4)_2 + 0.1842 \text{Li}_2\text{Mn}_3\text{NiO}_8 + 0.1182 \text{Li}_4\text{MnCo}_5\text{O}_{12} + 0.0591 \text{LiClO}_4 + 0.3523 \text{In}_2\text{O}_3 + 4.168 \text{LiCl}$                     | 36  |
|        | $\text{Li}_3\text{BiCl}_6$                       | $0.2185 \text{Li}_{10}\text{Mn}_3\text{Co}_2(\text{NiO}_4)_5 + 0.7815 \text{Li}_3\text{BiCl}_6 \rightarrow 0.1362 \text{Li}_2\text{Mn}_3\text{NiO}_8 + 0.1594 \text{Mn}(\text{Ni}_3\text{O}_4)_2 + 0.0437 \text{LiClO}_4 + 0.0874 \text{Li}_4\text{MnCo}_5\text{O}_{12} + 0.7815 \text{BiClO} + 3.864 \text{LiCl}$                              | 47  |
| NMC532 | $\text{Li}_3\text{ScCl}_6$                       | $0.2955 \text{Li}_{10}\text{Mn}_3\text{Co}_2(\text{NiO}_4)_5 + 0.7045 \text{Li}_3\text{ScCl}_6 \rightarrow 0.2155 \text{Mn}(\text{Ni}_3\text{O}_4)_2 + 0.1842 \text{Li}_2\text{Mn}_3\text{NiO}_8 + 0.0591 \text{LiClO}_4 + 0.1182 \text{Li}_4\text{MnCo}_5\text{O}_{12} + 4.168 \text{LiCl} + 0.3523 \text{Sc}_2\text{O}_3$                     | 73  |
|        | $\text{Li}_3\text{LuCl}_6$                       | $0.2632 \text{Li}_{10}\text{Mn}_3\text{Co}_2(\text{NiO}_4)_5 + 0.7368 \text{Li}_3\text{LuCl}_6 \rightarrow 0.3421 \text{Lu}_2\text{Mn}_2\text{O}_7 + 0.05263 \text{LiClO}_4 + 0.1053 \text{Li}_4\text{MnCo}_5\text{O}_{12} + 0.02632 \text{Lu}_2\text{O}_3 + 4.368 \text{LiCl} + 1.316 \text{NiO}$                                              | 76  |
|        | $\text{Li}_3\text{TmCl}_6$                       | $0.2317 \text{Li}_{10}\text{Mn}_3\text{Co}_2(\text{NiO}_4)_5 + 0.7683 \text{Li}_3\text{TmCl}_6 \rightarrow 0.09266 \text{Li}_4\text{MnCo}_5\text{O}_{12} + 0.1931 \text{Mn}(\text{Ni}_3\text{O}_4)_2 + 0.2046 \text{Tm}_2\text{Mn}_2\text{O}_7 + 0.04633 \text{LiClO}_4 + 4.205 \text{LiCl} + 0.3591 \text{TmClO}$                              | 68  |
|        | $\text{Li}_3\text{ErCl}_6$                       | $0.2317 \text{Li}_{10}\text{Mn}_3\text{Co}_2(\text{NiO}_4)_5 + 0.7683 \text{Li}_3\text{ErCl}_6 \rightarrow 0.09266 \text{Li}_4\text{MnCo}_5\text{O}_{12} + 0.1931 \text{Mn}(\text{Ni}_3\text{O}_4)_2 + 0.2046 \text{Er}_2\text{Mn}_2\text{O}_7 + 0.04633 \text{LiClO}_4 + 4.205 \text{LiCl} + 0.3591 \text{ErClO}$                              | 66  |
|        | $\text{Li}_3\text{YCl}_6$                        | $0.2185 \text{Li}_{10}\text{Mn}_3\text{Co}_2(\text{NiO}_4)_5 + 0.7815 \text{Li}_3\text{YCl}_6 \rightarrow 0.1362 \text{Li}_2\text{Mn}_3\text{NiO}_8 + 0.0874 \text{Li}_4\text{MnCo}_5\text{O}_{12} + 0.1594 \text{Mn}(\text{Ni}_3\text{O}_4)_2 + 0.7815 \text{YClO} + 0.0437 \text{LiClO}_4 + 3.864 \text{LiCl}$                                | 51  |
|        | $\text{Li}_3\text{HoCl}_6$                       | $0.2745 \text{Li}_{10}\text{Mn}_3\text{Co}_2(\text{NiO}_4)_5 + 0.7255 \text{Li}_3\text{HoCl}_6 \rightarrow 0.06444 \text{Li}_2\text{Mn}_3\text{NiO}_8 + 0.1575 \text{Mn}(\text{Ni}_3\text{O}_4)_2 + 0.1098 \text{Li}_4\text{MnCo}_5\text{O}_{12} + 0.3628 \text{Ho}_2\text{MnNiO}_6 + 0.05489 \text{LiClO}_4 + 4.298 \text{LiCl}$               | 67  |
|        | $\text{Li}_3\text{DyCl}_6$                       | $0.7815 \text{Li}_3\text{DyCl}_6 + 0.2185 \text{Li}_{10}\text{Mn}_3\text{Co}_2(\text{NiO}_4)_5 \rightarrow 0.1362 \text{Li}_2\text{Mn}_3\text{NiO}_8 + 0.0874 \text{Li}_4\text{MnCo}_5\text{O}_{12} + 0.1594 \text{Mn}(\text{Ni}_3\text{O}_4)_2 + 0.0437 \text{LiClO}_4 + 3.864 \text{LiCl} + 0.7815 \text{DyClO}$                              | 61  |
|        | $\text{Li}_3\text{TbCl}_6$                       | $0.2632 \text{Li}_{10}\text{Mn}_3\text{Co}_2(\text{NiO}_4)_5 + 0.7368 \text{Li}_3\text{TbCl}_6 \rightarrow 0.1805 \text{Mn}(\text{Ni}_3\text{O}_4)_2 + 0.2331 \text{Tb}_2\text{MnNiO}_6 + 0.05263 \text{LiClO}_4 +$                                                                                                                             | 54  |

|                                                            |                                                                                                                                                                                                                                                                                                                                                                                                            |     |
|------------------------------------------------------------|------------------------------------------------------------------------------------------------------------------------------------------------------------------------------------------------------------------------------------------------------------------------------------------------------------------------------------------------------------------------------------------------------------|-----|
|                                                            | $0.1353 \text{ Tb}_2\text{Mn}_2\text{O}_7 + 0.1053 \text{ Li}_4\text{MnCo}_5\text{O}_{12} + 4.368 \text{ LiCl}$                                                                                                                                                                                                                                                                                            |     |
| $\text{Li}_3\text{SmCl}_6$                                 | $0.2185 \text{ Li}_{10}\text{Mn}_3\text{Co}_2(\text{NiO}_4)_5 + 0.7815 \text{ Li}_3\text{SmCl}_6 \rightarrow 0.1362$<br>$\text{Li}_2\text{Mn}_3\text{NiO}_8 + 0.1594 \text{ Mn}(\text{Ni}_3\text{O}_4)_2 + 0.0874$<br>$\text{Li}_4\text{MnCo}_5\text{O}_{12} + 0.0437 \text{ LiClO}_4 + 3.864 \text{ LiCl} + 0.7815 \text{ SmClO}$                                                                         | 62  |
| $\text{Li}_2\text{ZrCl}_6$                                 | $0.2113 \text{ Li}_{10}\text{Mn}_3\text{Co}_2(\text{NiO}_4)_5 + 0.7887 \text{ Li}_2\text{ZrCl}_6 \rightarrow 0.1831$<br>$\text{Li}_2\text{Mn}_3\text{NiO}_8 + 0.08451 \text{ Li}_4\text{MnCo}_5\text{O}_{12} + 0.04225 \text{ LiClO}_4$<br>$+ 0.8732 \text{ NiCl}_2 + 2.944 \text{ LiCl} + 0.7887 \text{ ZrO}_2$                                                                                           | 111 |
| $\text{Li}_{2.5}\text{In}_{0.5}\text{Zr}_{0.5}\text{Cl}_6$ | $0.2185 \text{ Li}_{10}\text{Mn}_3\text{Co}_2(\text{NiO}_4)_5 + 0.7815 \text{ Li}_{2.5}\text{Zr}_{0.5}\text{In}_{0.5}\text{Cl}_6 \rightarrow$<br>$0.0874 \text{ Li}_4\text{MnCo}_5\text{O}_{12} + 0.1594 \text{ Mn}(\text{Ni}_3\text{O}_4)_2 + 0.1362$<br>$\text{Li}_2\text{Mn}_3\text{NiO}_8 + 0.0437 \text{ LiClO}_4 + 0.3907 \text{ Li}_3\text{InCl}_6 + 2.301$<br>$\text{LiCl} + 0.3907 \text{ ZrO}_2$ | 74  |
| $\text{Li}_{2.5}\text{Sc}_{0.5}\text{Zr}_{0.5}\text{Cl}_6$ | $0.1899 \text{ Li}_{10}\text{Mn}_3\text{Co}_2(\text{NiO}_4)_5 + 0.8101 \text{ Li}_{2.5}\text{Zr}_{0.5}\text{Sc}_{0.5}\text{Cl}_6 \rightarrow$<br>$0.1646 \text{ Li}_2\text{Mn}_3\text{NiO}_8 + 0.07595 \text{ Li}_4\text{MnCo}_5\text{O}_{12} + 0.7848$<br>$\text{NiCl}_2 + 0.03797 \text{ LiClO}_4 + 0.4051 \text{ ZrO}_2 + 3.253 \text{ LiCl} +$<br>$0.2025 \text{ Sc}_2\text{O}_3$                      | 89  |
| $\text{Li}_{2.5}\text{Y}_{0.5}\text{Zr}_{0.5}\text{Cl}_6$  | $0.1673 \text{ Li}_{10}\text{Mn}_3\text{Co}_2(\text{NiO}_4)_5 + 0.8327 \text{ Li}_{2.5}\text{Y}_{0.5}\text{Zr}_{0.5}\text{Cl}_6 \rightarrow$<br>$0.145 \text{ Li}_2\text{Mn}_3\text{NiO}_8 + 0.06691 \text{ Li}_4\text{MnCo}_5\text{O}_{12} + 0.03346$<br>$\text{LiClO}_4 + 0.6914 \text{ NiCl}_2 + 0.4164 \text{ ZrO}_2 + 0.4164 \text{ YClO} +$<br>$3.164 \text{ LiCl}$                                  | 81  |
| $\text{Li}_{2.5}\text{Er}_{0.5}\text{Zr}_{0.5}\text{Cl}_6$ | $0.1596 \text{ Li}_{10}\text{Mn}_3\text{Co}_2(\text{NiO}_4)_5 + 0.8404 \text{ Li}_{2.5}\text{Er}_{0.5}\text{Zr}_{0.5}\text{Cl}_6 \rightarrow$<br>$0.2074 \text{ Er}_2\text{Mn}_2\text{O}_7 + 0.4202 \text{ ZrO}_2 + 0.06383 \text{ Li}_4\text{MnCo}_5\text{O}_{12}$<br>$+ 0.03191 \text{ LiClO}_4 + 0.005319 \text{ ErClO} + 0.7979 \text{ NiCl}_2 +$<br>$3.41 \text{ LiCl}$                               | 93  |
| $\text{Li}_3\text{InCl}_3\text{Br}_3$                      | $0.3103 \text{ Li}_{10}\text{Mn}_3\text{Co}_2(\text{NiO}_4)_5 + 0.6897 \text{ Li}_3\text{In}(\text{BrCl})_3 \rightarrow$<br>$0.269 \text{ Li}_2\text{Mn}_3\text{NiO}_8 + 0.1241 \text{ Li}_4\text{MnCo}_5\text{O}_{12} + 0.06207$<br>$\text{LiClO}_4 + 2.069 \text{ LiBr} + 1.283 \text{ NiO} + 0.3448 \text{ In}_2\text{O}_3 + 2.007$<br>$\text{LiCl}$                                                    | 17  |
| $\text{Li}_3\text{ScCl}_3\text{Br}_3$                      | $0.1536 \text{ Li}_{10}\text{Mn}_3\text{Co}_2(\text{NiO}_4)_5 + 0.8464 \text{ Li}_3\text{Sc}(\text{BrCl})_3 \rightarrow$<br>$0.06143 \text{ Li}_4\text{MnCo}_5\text{O}_{12} + 0.1331 \text{ Li}_2\text{Mn}_3\text{NiO}_8 + 0.1229$<br>$\text{BrCl} + 0.6348 \text{ NiBr}_2 + 2.416 \text{ LiCl} + 1.147 \text{ LiBr} + 0.4232$<br>$\text{Sc}_2\text{O}_3$                                                  | 82  |
| $\text{Li}_3\text{LuCl}_3\text{Br}_3$                      | $0.1304 \text{ Li}_{10}\text{Mn}_3\text{Co}_2(\text{NiO}_4)_5 + 0.8696 \text{ Li}_3\text{Lu}(\text{BrCl})_3 \rightarrow$<br>$0.05217 \text{ Li}_4\text{MnCo}_5\text{O}_{12} + 0.1696 \text{ Lu}_2\text{Mn}_2\text{O}_7 + 0.1043 \text{ BrCl}$<br>$+ 0.6522 \text{ NiBr}_2 + 1.2 \text{ LiBr} + 2.504 \text{ LiCl} + 0.2652 \text{ Lu}_2\text{O}_3$                                                         | 89  |
| $\text{Li}_3\text{TmCl}_3\text{Br}_3$                      | $0.1031 \text{ Li}_{10}\text{Mn}_3\text{Co}_2(\text{NiO}_4)_5 + 0.8969 \text{ Li}_3\text{Tm}(\text{BrCl})_3 \rightarrow$<br>$0.04124 \text{ Li}_4\text{MnCo}_5\text{O}_{12} + 0.134 \text{ Tm}_2\text{Mn}_2\text{O}_7 + 0.6289$<br>$\text{TmClO} + 0.08247 \text{ BrCl} + 0.5155 \text{ NiBr}_2 + 1.979 \text{ LiCl} +$<br>$1.577 \text{ LiBr}$                                                            | 79  |
| $\text{Li}_3\text{ErCl}_3\text{Br}_3$                      | $0.1031 \text{ Li}_{10}\text{Mn}_3\text{Co}_2(\text{NiO}_4)_5 + 0.8969 \text{ Li}_3\text{Er}(\text{BrCl})_3 \rightarrow$<br>$0.134 \text{ Er}_2\text{Mn}_2\text{O}_7 + 0.04124 \text{ Li}_4\text{MnCo}_5\text{O}_{12} + 0.08247 \text{ BrCl}$<br>$+ 0.9485 \text{ LiBr} + 0.5155 \text{ NiBr}_2 + 0.6289 \text{ ErBrO} + 2.608$<br>$\text{LiCl}$                                                           | 77  |
| $\text{Li}_3\text{YCl}_3\text{Br}_3$                       | $0.1181 \text{ Li}_{10}\text{Mn}_3\text{Co}_2(\text{NiO}_4)_5 + 0.8819 \text{ Li}_3\text{Y}(\text{BrCl})_3 \rightarrow$<br>$0.1024 \text{ Li}_2\text{Mn}_3\text{NiO}_8 + 0.02362 \text{ LiClO}_4 + 0.04724$<br>$\text{Li}_4\text{MnCo}_5\text{O}_{12} + 0.4882 \text{ NiBr}_2 + 1.669 \text{ LiBr} + 0.8819$<br>$\text{YClO} + 1.74 \text{ LiCl}$                                                          | 48  |
| $\text{Li}_3\text{HoCl}_3\text{Br}_3$                      | $0.1031 \text{ Li}_{10}\text{Mn}_3\text{Co}_2(\text{NiO}_4)_5 + 0.8969 \text{ Li}_3\text{Ho}(\text{BrCl})_3 \rightarrow$<br>$0.134 \text{ Ho}_2\text{Mn}_2\text{O}_7 + 0.04124 \text{ Li}_4\text{MnCo}_5\text{O}_{12} + 0.9485 \text{ LiBr}$<br>$+ 0.5155 \text{ NiBr}_2 + 0.08247 \text{ BrCl} + 0.6289 \text{ HoBrO} + 2.608$<br>$\text{LiCl}$                                                           | 76  |
| $\text{Li}_3\text{DyCl}_3\text{Br}_3$                      | $0.1031 \text{ Li}_{10}\text{Mn}_3\text{Co}_2(\text{NiO}_4)_5 + 0.8969 \text{ Li}_3\text{Dy}(\text{BrCl})_3 \rightarrow$<br>$0.134 \text{ Dy}_2\text{Mn}_2\text{O}_7 + 0.08247 \text{ BrCl} + 0.04124$<br>$\text{Li}_4\text{MnCo}_5\text{O}_{12} + 0.6289 \text{ DyClO} + 0.5155 \text{ NiBr}_2 + 1.979$<br>$\text{LiCl} + 1.577 \text{ LiBr}$                                                             | 69  |
| $\text{Li}_3\text{TbCl}_3\text{Br}_3$                      | $0.8252 \text{ Li}_3\text{Tb}(\text{BrCl})_3 + 0.1748 \text{ Li}_{10}\text{Mn}_3\text{Co}_2(\text{NiO}_4)_5 \rightarrow$<br>$0.04196 \text{ Tb}_2\text{Mn}_2\text{O}_7 + 0.06993 \text{ Li}_4\text{MnCo}_5\text{O}_{12} + 0.3706$                                                                                                                                                                          | 61  |

---

|                            |                                                                                                                                                                                                                                                                                                                                              |     |
|----------------------------|----------------------------------------------------------------------------------------------------------------------------------------------------------------------------------------------------------------------------------------------------------------------------------------------------------------------------------------------|-----|
|                            | $\text{Tb}_2\text{MnNiO}_6 + 0.03497 \text{ LiClO}_4 + 0.5035 \text{ NiBr}_2 + 2.441$<br>$\text{LiCl} + 1.469 \text{ LiBr}$                                                                                                                                                                                                                  |     |
| $\text{Li}_3\text{InBr}_6$ | $0.2206 \text{ Li}_{10}\text{Mn}_3\text{Co}_2(\text{NiO}_4)_5 + 0.7794 \text{ Li}_3\text{InBr}_6 \rightarrow 0.1912$<br>$\text{Li}_2\text{Mn}_3\text{NiO}_8 + 0.04412 \text{ Br}_2\text{O}_3 + 0.7794 \text{ InBrO} + 0.08824$<br>$\text{Li}_4\text{MnCo}_5\text{O}_{12} + 3.809 \text{ LiBr} + 0.9118 \text{ NiO}$                          | 22  |
| $\text{Li}_3\text{BiBr}_6$ | $0.2632 \text{ Li}_{10}\text{Mn}_3\text{Co}_2\text{NiO}_2\text{O} + 0.7368 \text{ Li}_3\text{BiBr}_6 \rightarrow 0.1053$<br>$\text{Li}_4\text{MnCo}_5\text{O}_{12} + 0.6842 \text{ Li}_2\text{MnO}_3 + 0.2632 \text{ NiO} + 0.7368$<br>$\text{BiBrO} + 0.3158 \text{ Br}_2\text{O}_3 + 3.053 \text{ LiBr}$                                   | 21  |
| $\text{Li}_3\text{ScBr}_6$ | $0.1536 \text{ Li}_{10}\text{Mn}_3\text{Co}_2\text{NiO}_2\text{O} + 0.8464 \text{ Li}_3\text{ScBr}_6 \rightarrow 0.1331$<br>$\text{Li}_2\text{Mn}_3\text{NiO}_8 + 0.06143 \text{ Li}_4\text{MnCo}_5\text{O}_{12} + 0.02048 \text{ NiBr}_2 +$<br>$3.563 \text{ LiBr} + 1.474 \text{ Br} + 0.4232 \text{ Sc}_2\text{O}_3$                      | 104 |
| $\text{Li}_3\text{LuBr}_6$ | $0.1899 \text{ Li}_{10}\text{Mn}_3\text{Co}_2\text{NiO}_2\text{O} + 0.8101 \text{ Li}_3\text{LuBr}_6 \rightarrow 0.2278$<br>$\text{Br}_2\text{O}_3 + 0.07595 \text{ Li}_4\text{MnCo}_5\text{O}_{12} + 0.1899 \text{ NiBr}_2 + 0.2468$<br>$\text{Lu}_2\text{Mn}_2\text{O}_7 + 4.025 \text{ LiBr} + 0.1582 \text{ Lu}_2\text{O}_3$             | 98  |
| $\text{Li}_3\text{TmBr}_6$ | $0.1899 \text{ Li}_{10}\text{Mn}_3\text{Co}_2\text{NiO}_2\text{O} + 0.8101 \text{ Li}_3\text{TmBr}_6 \rightarrow 0.07595$<br>$\text{Li}_4\text{MnCo}_5\text{O}_{12} + 0.1899 \text{ NiBr}_2 + 0.2278 \text{ Br}_2\text{O}_3 + 0.2468 \text{ T}$<br>$\text{m}_2\text{Mn}_2\text{O}_7 + 4.025 \text{ LiBr} + 0.1582 \text{ Tm}_2\text{O}_3$    | 91  |
| $\text{Li}_3\text{ErBr}_6$ | $0.8361 \text{ Li}_3\text{ErBr}_6 + 0.1639 \text{ Li}_{10}\text{Mn}_3\text{Co}_2\text{NiO}_2\text{O} \rightarrow 0.1967$<br>$\text{Br}_2\text{O}_3 + 0.06557 \text{ Li}_4\text{MnCo}_5\text{O}_{12} + 0.2131 \text{ Er}_2\text{Mn}_2\text{O}_7 +$<br>$0.1639 \text{ NiBr}_2 + 0.4098 \text{ ErBrO} + 3.885 \text{ LiBr}$                     | 82  |
| $\text{Li}_3\text{YBr}_6$  | $0.1765 \text{ Li}_{10}\text{Mn}_3\text{Co}_2\text{NiO}_2\text{O} + 0.8235 \text{ Li}_3\text{YBr}_6 \rightarrow 0.1529$<br>$\text{Li}_2\text{Mn}_3\text{NiO}_8 + 0.8235 \text{ YBrO} + 0.07059 \text{ Li}_4\text{MnCo}_5\text{O}_{12} +$<br>$0.2118 \text{ Br}_2\text{O}_3 + 0.02353 \text{ NiBr}_2 + 3.647 \text{ LiBr}$                    | 73  |
| $\text{Li}_3\text{HoBr}_6$ | $0.1639 \text{ Li}_{10}\text{Mn}_3\text{Co}_2\text{NiO}_2\text{O} + 0.8361 \text{ Li}_3\text{HoBr}_6 \rightarrow 0.06557$<br>$\text{Li}_4\text{MnCo}_5\text{O}_{12} + 0.1967 \text{ Br}_2\text{O}_3 + 0.1639 \text{ NiBr}_2 + 0.4098$<br>$\text{HoBrO} + 0.2131 \text{ Ho}_2\text{Mn}_2\text{O}_7 + 3.885 \text{ LiBr}$                      | 84  |
| $\text{Li}_3\text{DyBr}_6$ | $0.2174 \text{ Li}_{10}\text{Mn}_3\text{Co}_2\text{NiO}_2\text{O} + 0.7826 \text{ Li}_3\text{DyBr}_6 \rightarrow 0.08696$<br>$\text{Li}_4\text{MnCo}_5\text{O}_{12} + 0.2609 \text{ Br}_2\text{O}_3 + 0.2174 \text{ Dy}_2\text{MnNiO}_6 +$<br>$0.1739 \text{ Dy}_2\text{Mn}_2\text{O}_7 + 4.174 \text{ LiBr}$                                | 78  |
| $\text{Li}_3\text{TbBr}_6$ | $0.2174 \text{ Li}_{10}\text{Mn}_3\text{Co}_2\text{NiO}_2\text{O} + 0.7826 \text{ Li}_3\text{TbBr}_6 \rightarrow 0.2174$<br>$\text{Tb}_2\text{MnNiO}_6 + 0.08696 \text{ Li}_4\text{MnCo}_5\text{O}_{12} + 0.2609 \text{ Br}_2\text{O}_3 +$<br>$0.1739 \text{ Tb}_2\text{Mn}_2\text{O}_7 + 4.174 \text{ LiBr}$                                | 76  |
| $\text{Li}_3\text{ScI}_6$  | $0.5889 \text{ Li}_{10}\text{Mn}_3\text{Co}_2\text{NiO}_2\text{O} + 0.4111 \text{ Li}_3\text{ScI}_6 \rightarrow 0.2356$<br>$\text{Li}_4\text{MnCo}_5\text{O}_{12} + 1.531 \text{ Li}_2\text{MnO}_3 + 0.6236 \text{ Li}_5\text{IO}_6 + 0.5889$<br>$\text{NiI}_2 + 0.2055 \text{ Sc}_2\text{O}_3 + 0.6651 \text{ I}$                           | 193 |
| $\text{Li}_3\text{LuI}_6$  | $0.6276 \text{ Li}_{10}\text{Mn}_3\text{Co}_2\text{NiO}_2\text{O} + 0.3724 \text{ Li}_3\text{LuI}_6 \rightarrow 0.251$<br>$\text{Li}_4\text{MnCo}_5\text{O}_{12} + 0.3724 \text{ LuMnO}_3 + 0.7741 \text{ Li}_5\text{IO}_6 +$<br>$0.6276 \text{ NiI}_2 + 1.259 \text{ Li}_2\text{MnO}_3 + 0.205 \text{ I}$                                   | 192 |
| $\text{Li}_3\text{TmI}_6$  | $0.6276 \text{ Li}_{10}\text{Mn}_3\text{Co}_2\text{NiO}_2\text{O} + 0.3724 \text{ Li}_3\text{TmI}_6 \rightarrow 0.251$<br>$\text{Li}_4\text{MnCo}_5\text{O}_{12} + 0.3724 \text{ TmMnO}_3 + 0.7741 \text{ Li}_5\text{IO}_6 +$<br>$0.6276 \text{ NiI}_2 + 1.259 \text{ Li}_2\text{MnO}_3 + 0.205 \text{ I}$                                   | 190 |
| $\text{Li}_3\text{ErI}_6$  | $0.6276 \text{ Li}_{10}\text{Mn}_3\text{Co}_2\text{NiO}_2\text{O} + 0.3724 \text{ Li}_3\text{ErI}_6 \rightarrow 0.251$<br>$\text{Li}_4\text{MnCo}_5\text{O}_{12} + 0.3724 \text{ ErMnO}_3 + 0.6276 \text{ NiI}_2 + 0.7741$<br>$\text{Li}_5\text{IO}_6 + 1.259 \text{ Li}_2\text{MnO}_3 + 0.205 \text{ I}$                                    | 188 |
| $\text{Li}_3\text{HoI}_6$  | $0.6474 \text{ Li}_{10}\text{Mn}_3\text{Co}_2\text{NiO}_2\text{O} + 0.3526 \text{ Li}_3\text{HoI}_6 \rightarrow 0.135$<br>$\text{HoMn}_2\text{O}_5 + 0.259 \text{ Li}_4\text{MnCo}_5\text{O}_{12} + 0.2176 \text{ HoMnO}_3 +$<br>$0.6474 \text{ NiI}_2 + 0.8209 \text{ Li}_5\text{IO}_6 + 1.196 \text{ Li}_2\text{MnO}_3$                    | 187 |
| $\text{Li}_3\text{DyI}_6$  | $0.6948 \text{ Li}_{10}\text{Mn}_3\text{Co}_2\text{NiO}_2\text{O} + 0.3052 \text{ Li}_3\text{DyI}_6 \rightarrow 0.2779$<br>$\text{Li}_4\text{MnCo}_5\text{O}_{12} + 0.3052 \text{ DyMn}_2\text{O}_5 + 0.4796 \text{ NiI}_2 + 0.8719$<br>$\text{Li}_5\text{IO}_6 + 0.2153 \text{ NiO} + 1.196 \text{ Li}_2\text{MnO}_3$                       | 186 |
| $\text{Li}_3\text{TbI}_6$  | $0.1696 \text{ Li}_3\text{TbI}_6 + 0.8304 \text{ Li}_{10}\text{Mn}_3\text{Co}_2\text{NiO}_2\text{O} \rightarrow 0.3322$<br>$\text{Li}_4\text{MnCo}_5\text{O}_{12} + 0.311 \text{ Li}_2\text{Mn}_3\text{NiO}_8 + 0.1696 \text{ TbMn}_2\text{O}_5 +$<br>$1.018 \text{ Li}_5\text{IO}_6 + 0.5194 \text{ NiO} + 0.8869 \text{ Li}_2\text{MnO}_3$ | 185 |
| $\text{Li}_3\text{SmI}_6$  | $0.07143 \text{ Li}_{10}\text{Mn}_3\text{Co}_2(\text{NiO}_4)_5 + 0.9286 \text{ Li}_3\text{SmI}_6 \rightarrow$<br>$0.03571 \text{ LiCoO}_2 + 0.1071 \text{ Mn}_2\text{CoO}_4 + 0.3571 \text{ NiI}_2 +$                                                                                                                                        | 87  |

---

0.9286 SmIO + 3.464 LiI + 0.4643 I

|                                                                 |                                                                                                                                                 |     |
|-----------------------------------------------------------------|-------------------------------------------------------------------------------------------------------------------------------------------------|-----|
|                                                                 | $0.2892 \text{ Li}_5\text{MnCoNi}_3\text{O}_{10} + 0.7108 \text{ Li}_3\text{PS}_4 \rightarrow 0.2892$                                           |     |
| Li <sub>3</sub> PS <sub>4</sub>                                 | $\text{Co}(\text{NiS}_2)_2 + 0.01205 \text{ Li}_2\text{SO}_4 + 0.09639 \text{ Ni}_3\text{S}_4 + 0.2892$                                         | 432 |
|                                                                 | $\text{MnS}_2 + 0.7108 \text{ Li}_2\text{S} + 0.7108 \text{ Li}_3\text{PO}_4$                                                                   |     |
|                                                                 | $0.5693 \text{ Li}_5\text{MnCoNi}_3\text{O}_{10} + 0.4307 \text{ Li}_{10}\text{Ge}(\text{PS}_6)_2 \rightarrow 0.5693$                           |     |
| Li <sub>10</sub> GeP <sub>2</sub> S <sub>12</sub>               | $\text{Co}(\text{NiS}_2)_2 + 0.4307 \text{ Li}_2\text{MnGeO}_4 + 0.1314 \text{ Li}_2\text{SO}_4 +$                                              | 366 |
|                                                                 | $0.1898 \text{ Ni}_3\text{S}_4 + 0.1387 \text{ MnS}_2 + 1.723 \text{ Li}_2\text{S} + 0.8613$                                                    |     |
|                                                                 | $\text{Li}_3\text{PO}_4$                                                                                                                        |     |
|                                                                 | $0.7108 \text{ Li}_6\text{Ps}_5\text{Cl} + 0.2892 \text{ Li}_5\text{MnCoNi}_3\text{O}_{10} \rightarrow 0.2892$                                  |     |
| Li <sub>6</sub> Ps <sub>5</sub> Cl                              | $\text{Co}(\text{NiS}_2)_2 + 0.01205 \text{ Li}_2\text{SO}_4 + 0.09639 \text{ Ni}_3\text{S}_4 + 0.2892$                                         | 382 |
|                                                                 | $\text{MnS}_2 + 1.422 \text{ Li}_2\text{S} + 0.7108 \text{ LiCl} + 0.7108 \text{ Li}_3\text{PO}_4$                                              |     |
|                                                                 | $0.4 \text{ Li}_7\text{La}_3\text{Zr}_2\text{O}_{12} + 0.6 \text{ Li}_5\text{MnCoNi}_3\text{O}_{10} \rightarrow 1.4 \text{ LiNiO}_2 +$          |     |
| Li <sub>7</sub> La <sub>3</sub> Zr <sub>2</sub> O <sub>12</sub> | $0.4 \text{ Li}_5\text{NiO}_4 + 0.4 \text{ Li}_6\text{Zr}_2\text{O}_7 + 0.6 \text{ La}_2\text{MnCoO}_6$                                         | 67  |
| LiGaO <sub>2</sub>                                              | $\text{LiGaO}_2 \rightarrow \text{LiGaO}_2$                                                                                                     | 0   |
|                                                                 | $0.5 \text{ Li}_5\text{MnCoNi}_3\text{O}_{10} + 0.5 \text{ Li}_2\text{La}_2\text{Ti}_3\text{O}_{10} \rightarrow 0.5 \text{ Li}(\text{NiO}_2)_2$ |     |
| Li <sub>2</sub> La <sub>2</sub> Ti <sub>3</sub> O <sub>10</sub> | $+ 1.5 \text{ Li}_2\text{TiO}_3 + 0.5 \text{ La}_2\text{MnCoO}_6 + 0.5 \text{ NiO}$                                                             | 85  |
|                                                                 | $0.5806 \text{ Li}_5\text{MnCoNi}_3\text{O}_{10} + 0.7097 \text{ Li}_3\text{InCl}_6 \rightarrow 0.1548$                                         |     |
| Li <sub>3</sub> InCl <sub>6</sub>                               | $\text{Li}_2\text{Mn}_3\text{NiO}_8 + 0.1161 \text{ Li}_4\text{MnCo}_5\text{O}_{12} + 0.1306 \text{ LiClO}_4 +$                                 | 45  |
|                                                                 | $0.3548 \text{ In}_2\text{O}_3 + 4.127 \text{ LiCl} + 1.587 \text{ NiO}$                                                                        |     |
|                                                                 | $0.4009 \text{ Li}_5\text{MnCoNi}_3\text{O}_{10} + 0.7995 \text{ Li}_3\text{BiCl}_6 \rightarrow 0.04245$                                        |     |
| Li <sub>3</sub> BiCl <sub>6</sub>                               | $\text{Li}_2\text{Mn}_3\text{NiO}_8 + 0.1934 \text{ Mn}(\text{Ni}_3\text{O}_4)_2 + 0.09021 \text{ LiClO}_4 +$                                   | 55  |
|                                                                 | $0.08019 \text{ Li}_4\text{MnCo}_5\text{O}_{12} + 0.7995 \text{ BiClO} + 3.907 \text{ LiCl}$                                                    |     |
|                                                                 | $0.5466 \text{ Li}_5\text{MnCoNi}_3\text{O}_{10} + 0.7267 \text{ Li}_3\text{ScCl}_6 \rightarrow 0.2637$                                         |     |
| Li <sub>3</sub> ScCl <sub>6</sub>                               | $\text{Mn}(\text{Ni}_3\text{O}_4)_2 + 0.05788 \text{ Li}_2\text{Mn}_3\text{NiO}_8 + 0.123 \text{ LiClO}_4 +$                                    | 84  |
|                                                                 | $0.1093 \text{ Li}_4\text{MnCo}_5\text{O}_{12} + 4.237 \text{ LiCl} + 0.3633 \text{ Sc}_2\text{O}_3$                                            |     |
|                                                                 | $0.5263 \text{ Li}_5\text{MnCoNi}_3\text{O}_{10} + 0.7368 \text{ Li}_3\text{LuCl}_6 \rightarrow 0.2105$                                         |     |
| Li <sub>3</sub> LuCl <sub>6</sub>                               | $\text{Lu}_2\text{Mn}_2\text{O}_7 + 0.1184 \text{ LiClO}_4 + 0.1053 \text{ Li}_4\text{MnCo}_5\text{O}_{12} +$                                   | 84  |
|                                                                 | $0.1579 \text{ Lu}_2\text{O}_3 + 4.303 \text{ LiCl} + 1.579 \text{ NiO}$                                                                        |     |
| NMC622                                                          | $0.4082 \text{ Li}_5\text{MnCoNi}_3\text{O}_{10} + 0.7959 \text{ Li}_3\text{TmCl}_6 \rightarrow 0.08163$                                        |     |
|                                                                 | $\text{Li}_4\text{MnCo}_5\text{O}_{12} + 0.2041 \text{ Mn}(\text{Ni}_3\text{O}_4)_2 + 0.06122$                                                  |     |
| Li <sub>3</sub> TmCl <sub>6</sub>                               | $\text{Tm}_2\text{Mn}_2\text{O}_7 + 0.09184 \text{ LiClO}_4 + 4.01 \text{ LiCl} + 0.6735$                                                       | 76  |
|                                                                 | $\text{TmClO}$                                                                                                                                  |     |
|                                                                 | $0.4545 \text{ Li}_5\text{MnCoNi}_3\text{O}_{10} + 0.7727 \text{ Li}_3\text{ErCl}_6 \rightarrow 0.09091$                                        |     |
| Li <sub>3</sub> ErCl <sub>6</sub>                               | $\text{Li}_4\text{MnCo}_5\text{O}_{12} + 0.1818 \text{ Er}_2\text{Mn}_2\text{O}_7 + 0.1023 \text{ LiClO}_4 +$                                   | 74  |
|                                                                 | $4.125 \text{ LiCl} + 0.4091 \text{ ErClO} + 1.364 \text{ NiO}$                                                                                 |     |
|                                                                 | $0.4009 \text{ Li}_5\text{MnCoNi}_3\text{O}_{10} + 0.7995 \text{ Li}_3\text{YCl}_6 \rightarrow 0.04245$                                         |     |
| Li <sub>3</sub> YCl <sub>6</sub>                                | $\text{Li}_2\text{Mn}_3\text{NiO}_8 + 0.08019 \text{ Li}_4\text{MnCo}_5\text{O}_{12} + 0.1934$                                                  | 59  |
|                                                                 | $\text{Mn}(\text{Ni}_3\text{O}_4)_2 + 0.7995 \text{ YClO} + 0.09021 \text{ LiClO}_4 + 3.907$                                                    |     |
|                                                                 | $\text{LiCl}$                                                                                                                                   |     |
|                                                                 | $0.5263 \text{ Li}_5\text{MnCoNi}_3\text{O}_{10} + 0.7368 \text{ Li}_3\text{HoCl}_6 \rightarrow 0.05263$                                        |     |
| Li <sub>3</sub> HoCl <sub>6</sub>                               | $\text{Mn}(\text{Ni}_3\text{O}_4)_2 + 0.1053 \text{ Li}_4\text{MnCo}_5\text{O}_{12} + 0.3684$                                                   | 76  |
|                                                                 | $\text{Ho}_2\text{MnNiO}_6 + 0.1184 \text{ LiClO}_4 + 4.303 \text{ LiCl} + 0.8947 \text{ NiO}$                                                  |     |
|                                                                 | $0.7995 \text{ Li}_3\text{DyCl}_6 + 0.4009 \text{ Li}_5\text{MnCoNi}_3\text{O}_{10} \rightarrow 0.04245$                                        |     |
| Li <sub>3</sub> DyCl <sub>6</sub>                               | $\text{Li}_2\text{Mn}_3\text{NiO}_8 + 0.08019 \text{ Li}_4\text{MnCo}_5\text{O}_{12} + 0.1934$                                                  | 70  |
|                                                                 | $\text{Mn}(\text{Ni}_3\text{O}_4)_2 + 0.09021 \text{ LiClO}_4 + 3.907 \text{ LiCl} + 0.7995$                                                    |     |
|                                                                 | $\text{DyClO}$                                                                                                                                  |     |
|                                                                 | $0.5263 \text{ Li}_5\text{MnCoNi}_3\text{O}_{10} + 0.7368 \text{ Li}_3\text{TbCl}_6 \rightarrow 0.05263$                                        |     |
| Li <sub>3</sub> TbCl <sub>6</sub>                               | $\text{Mn}(\text{Ni}_3\text{O}_4)_2 + 0.3684 \text{ Tb}_2\text{MnNiO}_6 + 0.1184 \text{ LiClO}_4 +$                                             | 63  |
|                                                                 | $0.1053 \text{ Li}_4\text{MnCo}_5\text{O}_{12} + 4.303 \text{ LiCl} + 0.8947 \text{ NiO}$                                                       |     |
|                                                                 | $0.4009 \text{ Li}_5\text{MnCoNi}_3\text{O}_{10} + 0.7995 \text{ Li}_3\text{SmCl}_6 \rightarrow 0.04245$                                        |     |
| Li <sub>3</sub> SmCl <sub>6</sub>                               | $\text{Li}_2\text{Mn}_3\text{NiO}_8 + 0.1934 \text{ Mn}(\text{Ni}_3\text{O}_4)_2 + 0.08019$                                                     | 71  |
|                                                                 | $\text{Li}_4\text{MnCo}_5\text{O}_{12} + 0.09021 \text{ LiClO}_4 + 3.907 \text{ LiCl} + 0.7995 \text{ S}$                                       |     |
|                                                                 | $\text{mClO}$                                                                                                                                   |     |
|                                                                 | $0.3046 \text{ Li}_5\text{MnCoNi}_3\text{O}_{10} + 0.6954 \text{ Li}_2\text{ZrCl}_6 \rightarrow 0.08122$                                        |     |
| Li <sub>2</sub> ZrCl <sub>6</sub>                               | $\text{Li}_2\text{Mn}_3\text{NiO}_8 + 0.06091 \text{ Li}_4\text{MnCo}_5\text{O}_{12} + 0.06853 \text{ LiClO}_4$                                 | 125 |
|                                                                 | $+ 0.8325 \text{ NiCl}_2 + 2.439 \text{ LiCl} + 0.6954 \text{ ZrO}_2$                                                                           |     |

|                                                            |                                                                                                                                                                                                                                                                                                                                                                                      |     |
|------------------------------------------------------------|--------------------------------------------------------------------------------------------------------------------------------------------------------------------------------------------------------------------------------------------------------------------------------------------------------------------------------------------------------------------------------------|-----|
| $\text{Li}_{2.5}\text{In}_{0.5}\text{Zr}_{0.5}\text{Cl}_6$ | $0.334 \text{Li}_5\text{MnCoNi}_3\text{O}_{10} + 0.666 \text{Li}_{2.5}\text{Zr}_{0.5}\text{In}_{0.5}\text{Cl}_6 \rightarrow$<br>$0.0668 \text{Li}_4\text{MnCo}_5\text{O}_{12} + 0.1611 \text{Mn}(\text{Ni}_3\text{O}_4)_2 + 0.03536$<br>$\text{Li}_2\text{Mn}_3\text{NiO}_8 + 0.07515 \text{LiClO}_4 + 0.333 \text{Li}_3\text{InCl}_6 + 1.923$<br>$\text{LiCl} + 0.333 \text{ZrO}_2$ | 84  |
| $\text{Li}_{2.5}\text{Sc}_{0.5}\text{Zr}_{0.5}\text{Cl}_6$ | $0.277 \text{Li}_5\text{MnCoNi}_3\text{O}_{10} + 0.723 \text{Li}_{2.5}\text{Zr}_{0.5}\text{Sc}_{0.5}\text{Cl}_6 \rightarrow$<br>$0.07388 \text{Li}_2\text{Mn}_3\text{NiO}_8 + 0.05541 \text{Li}_4\text{MnCo}_5\text{O}_{12} + 0.7573$<br>$\text{NiCl}_2 + 0.06234 \text{LiClO}_4 + 0.3615 \text{ZrO}_2 + 2.761 \text{LiCl} +$<br>$0.1807 \text{Sc}_2\text{O}_3$                      | 100 |
| $\text{Li}_{2.5}\text{Y}_{0.5}\text{Zr}_{0.5}\text{Cl}_6$  | $0.4293 \text{Li}_5\text{MnCoNi}_3\text{O}_{10} + 0.5707 \text{Li}_{2.5}\text{Y}_{0.5}\text{Zr}_{0.5}\text{Cl}_6 \rightarrow$<br>$0.04545 \text{Li}_2\text{Mn}_3\text{NiO}_8 + 0.08586 \text{Li}_4\text{MnCo}_5\text{O}_{12} + 0.09659$<br>$\text{LiClO}_4 + 0.2071 \text{Mn}(\text{Ni}_3\text{O}_4)_2 + 0.2854 \text{ZrO}_2 + 0.2854$<br>$\text{YClO} + 3.042 \text{LiCl}$          | 91  |
| $\text{Li}_{2.5}\text{Er}_{0.5}\text{Zr}_{0.5}\text{Cl}_6$ | $0.2419 \text{Li}_5\text{MnCoNi}_3\text{O}_{10} + 0.7581 \text{Li}_{2.5}\text{Er}_{0.5}\text{Zr}_{0.5}\text{Cl}_6 \rightarrow$<br>$0.09677 \text{Er}_2\text{Mn}_2\text{O}_7 + 0.379 \text{ZrO}_2 + 0.04839 \text{Li}_4\text{MnCo}_5\text{O}_{12}$<br>$+ 0.05444 \text{LiClO}_4 + 0.1855 \text{ErClO} + 0.7258 \text{NiCl}_2 +$<br>$2.857 \text{LiCl}$                                | 100 |
| $\text{Li}_3\text{InCl}_3\text{Br}_3$                      | $0.45 \text{Li}_5\text{MnCoNi}_3\text{O}_{10} + 0.55 \text{Li}_3\text{In}(\text{BrCl})_3 \rightarrow 0.12$<br>$\text{Li}_2\text{Mn}_3\text{NiO}_8 + 0.09 \text{Li}_4\text{MnCo}_5\text{O}_{12} + 0.1013 \text{LiClO}_4 +$<br>$1.65 \text{LiBr} + 1.23 \text{NiO} + 0.275 \text{In}_2\text{O}_3 + 1.549 \text{LiCl}$                                                                  | 26  |
| $\text{Li}_3\text{ScCl}_3\text{Br}_3$                      | $0.2153 \text{Li}_5\text{MnCoNi}_3\text{O}_{10} + 0.7847 \text{Li}_3\text{Sc}(\text{BrCl})_3 \rightarrow$<br>$0.04306 \text{Li}_4\text{MnCo}_5\text{O}_{12} + 0.05742 \text{Li}_2\text{Mn}_3\text{NiO}_8 + 0.1938$<br>$\text{BrCl} + 0.5885 \text{NiBr}_2 + 2.16 \text{LiCl} + 0.9833 \text{LiBr} + 0.3923$<br>$\text{Sc}_2\text{O}_3$                                               | 91  |
| $\text{Li}_3\text{LuCl}_3\text{Br}_3$                      | $0.2 \text{Li}_5\text{MnCoNi}_3\text{O}_{10} + 0.8 \text{Li}_3\text{Lu}(\text{BrCl})_3 \rightarrow 0.04$<br>$\text{Li}_4\text{MnCo}_5\text{O}_{12} + 0.08 \text{Lu}_2\text{Mn}_2\text{O}_7 + 0.18 \text{BrCl} + 0.6 \text{NiBr}_2$<br>$+ 1.02 \text{LiBr} + 2.22 \text{LiCl} + 0.32 \text{Lu}_2\text{O}_3$                                                                           | 96  |
| $\text{Li}_3\text{TmCl}_3\text{Br}_3$                      | $0.1754 \text{Li}_5\text{MnCoNi}_3\text{O}_{10} + 0.8246 \text{Li}_3\text{Tm}(\text{BrCl})_3 \rightarrow$<br>$0.03509 \text{Li}_4\text{MnCo}_5\text{O}_{12} + 0.03947 \text{LiClO}_4 + 0.07018$<br>$\text{Tm}_2\text{Mn}_2\text{O}_7 + 0.6842 \text{TmClO} + 0.5263 \text{NiBr}_2 + 1.75 \text{LiCl}$<br>$+ 1.421 \text{LiBr}$                                                       | 85  |
| $\text{Li}_3\text{ErCl}_3\text{Br}_3$                      | $0.1754 \text{Li}_5\text{MnCoNi}_3\text{O}_{10} + 0.8246 \text{Li}_3\text{Er}(\text{BrCl})_3 \rightarrow$<br>$0.07018 \text{Er}_2\text{Mn}_2\text{O}_7 + 0.03509 \text{Li}_4\text{MnCo}_5\text{O}_{12} + 0.03947$<br>$\text{LiClO}_4 + 0.7368 \text{LiBr} + 0.5263 \text{NiBr}_2 + 0.6842 \text{ErBrO} +$<br>$2.434 \text{LiCl}$                                                     | 83  |
| $\text{Li}_3\text{YCl}_3\text{Br}_3$                       | $0.365 \text{Li}_5\text{MnCoNi}_3\text{O}_{10} + 0.635 \text{Li}_3\text{Y}(\text{BrCl})_3 \rightarrow 0.1314$<br>$\text{Y}_2\text{MnNiO}_6 + 0.08212 \text{LiClO}_4 + 0.07299 \text{Li}_4\text{MnCo}_5\text{O}_{12} +$<br>$0.1606 \text{Mn}(\text{Ni}_3\text{O}_4)_2 + 1.905 \text{LiBr} + 0.3723 \text{YClO} + 1.451$<br>$\text{LiCl}$                                              | 54  |
| $\text{Li}_3\text{HoCl}_3\text{Br}_3$                      | $0.1754 \text{Li}_5\text{MnCoNi}_3\text{O}_{10} + 0.8246 \text{Li}_3\text{Ho}(\text{BrCl})_3 \rightarrow$<br>$0.07018 \text{Ho}_2\text{Mn}_2\text{O}_7 + 0.03509 \text{Li}_4\text{MnCo}_5\text{O}_{12} + 0.03947$<br>$\text{LiClO}_4 + 0.7368 \text{LiBr} + 0.5263 \text{NiBr}_2 + 0.6842 \text{HoBrO} +$<br>$2.434 \text{LiCl}$                                                     | 82  |
| $\text{Li}_3\text{DyCl}_3\text{Br}_3$                      | $0.1754 \text{Li}_5\text{MnCoNi}_3\text{O}_{10} + 0.8246 \text{Li}_3\text{Dy}(\text{BrCl})_3 \rightarrow$<br>$0.07018 \text{Dy}_2\text{Mn}_2\text{O}_7 + 0.03509 \text{Li}_4\text{MnCo}_5\text{O}_{12} + 0.6842$<br>$\text{DyClO} + 0.03947 \text{LiClO}_4 + 0.5263 \text{NiBr}_2 + 1.75 \text{LiCl} +$<br>$1.421 \text{LiBr}$                                                       | 75  |
| $\text{Li}_3\text{TbCl}_3\text{Br}_3$                      | $0.6154 \text{Li}_3\text{Tb}(\text{BrCl})_3 + 0.3846 \text{Li}_5\text{MnCoNi}_3\text{O}_{10} \rightarrow$<br>$0.07692 \text{Li}_4\text{MnCo}_5\text{O}_{12} + 0.3077 \text{Tb}_2\text{MnNiO}_6 + 0.08654$<br>$\text{LiClO}_4 + 0.1154 \text{NiBr}_2 + 0.7308 \text{NiO} + 1.76 \text{LiCl} +$<br>$1.615 \text{LiBr}$                                                                 | 66  |
| $\text{Li}_3\text{InBr}_6$                                 | $0.4215 \text{Li}_5\text{MnCoNi}_3\text{O}_{10} + 0.5785 \text{Li}_3\text{InBr}_6 \rightarrow 0.1124$<br>$\text{Li}_2\text{Mn}_3\text{NiO}_8 + 0.09485 \text{Br}_2\text{O}_3 + 0.08431 \text{Li}_4\text{MnCo}_5\text{O}_{12} +$<br>$0.2892 \text{In}_2\text{O}_3 + 3.281 \text{LiBr} + 1.152 \text{NiO}$                                                                             | 27  |
| $\text{Li}_3\text{BiBr}_6$                                 | $0.396 \text{Li}_5\text{MnCoNi}_3\text{O}_{10} + 0.604 \text{Li}_3\text{BiBr}_6 \rightarrow 0.07921$<br>$\text{Li}_4\text{MnCo}_5\text{O}_{12} + 0.3168 \text{Li}_2\text{MnO}_3 + 1.188 \text{NiO} + 0.604$<br>$\text{BiBrO} + 0.08911 \text{Br}_2\text{O}_3 + 2.842 \text{LiBr}$                                                                                                    | 14  |
| $\text{Li}_3\text{ScBr}_6$                                 | $0.2153 \text{Li}_5\text{MnCoNi}_3\text{O}_{10} + 0.7847 \text{Li}_3\text{ScBr}_6 \rightarrow 0.05742$<br>$\text{Li}_2\text{Mn}_3\text{NiO}_8 + 0.04306 \text{Li}_4\text{MnCo}_5\text{O}_{12} + 0.5885 \text{NiBr}_2 +$                                                                                                                                                              | 104 |

|        |                                           |                                                                                                                                                                                                                                                                                                                                                            |     |
|--------|-------------------------------------------|------------------------------------------------------------------------------------------------------------------------------------------------------------------------------------------------------------------------------------------------------------------------------------------------------------------------------------------------------------|-----|
|        |                                           | $3.144 \text{ LiBr} + 0.3876 \text{ Br} + 0.3923 \text{ Sc}_2\text{O}_3$                                                                                                                                                                                                                                                                                   |     |
|        | $\text{Li}_3\text{LuBr}_6$                | $0.2198 \text{ Li}_5\text{MnCoNi}_3\text{O}_{10} + 0.7802 \text{ Li}_3\text{LuBr}_6 \rightarrow 0.04945 \text{ Br}_2\text{O}_3 + 0.04396 \text{ Li}_4\text{MnCo}_5\text{O}_{12} + 0.6593 \text{ NiBr}_2 + 0.08791 \text{ Lu}_2\text{Mn}_2\text{O}_7 + 3.264 \text{ LiBr} + 0.3022 \text{ Lu}_2\text{O}_3$                                                  | 94  |
|        | $\text{Li}_3\text{TmBr}_6$                | $0.2 \text{ Li}_5\text{MnCoNi}_3\text{O}_{10} + 0.8 \text{ Li}_3\text{LuBr}_6 \rightarrow 0.04 \text{ Li}_4\text{MnCo}_5\text{O}_{12} + 0.6 \text{ NiBr}_2 + 0.08 \text{ Lu}_2\text{Mn}_2\text{O}_7 + 3.24 \text{ LiBr} + 0.32 \text{ Lu}_2\text{O}_3 + 0.36 \text{ Br}$                                                                                   | 94  |
|        | $\text{Li}_3\text{ErBr}_6$                | $0.8312 \text{ Li}_3\text{ErBr}_6 + 0.1688 \text{ Li}_5\text{MnCoNi}_3\text{O}_{10} \rightarrow 0.03797 \text{ Br}_2\text{O}_3 + 0.03376 \text{ Li}_4\text{MnCo}_5\text{O}_{12} + 0.06751 \text{ Er}_2\text{Mn}_2\text{O}_7 + 0.5063 \text{ NiBr}_2 + 0.6962 \text{ ErBrO} + 3.203 \text{ LiBr}$                                                           | 77  |
|        | $\text{Li}_3\text{YBr}_6$                 | $0.1688 \text{ Li}_5\text{MnCoNi}_3\text{O}_{10} + 0.8312 \text{ Li}_3\text{YBr}_6 \rightarrow 0.6962 \text{ YBrO} + 0.06751 \text{ Y}_2\text{Mn}_2\text{O}_7 + 0.03376 \text{ Li}_4\text{MnCo}_5\text{O}_{12} + 0.03797 \text{ Br}_2\text{O}_3 + 0.5063 \text{ NiBr}_2 + 3.203 \text{ LiBr}$                                                              | 68  |
|        | $\text{Li}_3\text{HoBr}_6$                | $0.1688 \text{ Li}_5\text{MnCoNi}_3\text{O}_{10} + 0.8312 \text{ Li}_3\text{HoBr}_6 \rightarrow 0.03376 \text{ Li}_4\text{MnCo}_5\text{O}_{12} + 0.03797 \text{ Br}_2\text{O}_3 + 0.5063 \text{ NiBr}_2 + 0.6962 \text{ HoBrO} + 0.06751 \text{ Ho}_2\text{Mn}_2\text{O}_7 + 3.203 \text{ LiBr}$                                                           | 81  |
|        | $\text{Li}_3\text{DyBr}_6$                | $0.249 \text{ Li}_5\text{MnCoNi}_3\text{O}_{10} + 0.751 \text{ Li}_3\text{DyBr}_6 \rightarrow 0.04979 \text{ Li}_4\text{MnCo}_5\text{O}_{12} + 0.05602 \text{ Br}_2\text{O}_3 + 0.1992 \text{ Dy}_2\text{MnNiO}_6 + 0.5477 \text{ NiBr}_2 + 3.299 \text{ LiBr} + 0.1763 \text{ Dy}_2\text{O}_3$                                                            | 69  |
|        | $\text{Li}_3\text{TbBr}_6$                | $0.249 \text{ Li}_5\text{MnCoNi}_3\text{O}_{10} + 0.751 \text{ Li}_3\text{TbBr}_6 \rightarrow 0.1992 \text{ Tb}_2\text{MnNiO}_6 + 0.04979 \text{ Li}_4\text{MnCo}_5\text{O}_{12} + 0.05602 \text{ Br}_2\text{O}_3 + 0.5477 \text{ NiBr}_2 + 3.299 \text{ LiBr} + 0.1763 \text{ Tb}_2\text{O}_3$                                                            | 66  |
|        | $\text{Li}_3\text{ScI}_6$                 | $0.1667 \text{ Li}_5\text{MnCoNi}_3\text{O}_{10} + 0.8333 \text{ Li}_3\text{ScI}_6 \rightarrow 0.08333 \text{ Mn}_2\text{CoO}_4 + 0.5 \text{ NiI}_2 + 0.08333 \text{ CoO} + 3.333 \text{ LiI} + 0.4167 \text{ Sc}_2\text{O}_3 + 0.6667 \text{ I}$                                                                                                          | 155 |
|        | $\text{Li}_3\text{LuI}_6$                 | $0.1667 \text{ Li}_5\text{MnCoNi}_3\text{O}_{10} + 0.8333 \text{ Li}_3\text{LuI}_6 \rightarrow 0.1667 \text{ LuMnO}_3 + 0.1667 \text{ CoO} + 0.5 \text{ NiI}_2 + 3.333 \text{ LiI} + 0.3333 \text{ Lu}_2\text{O}_3 + 0.6667 \text{ I}$                                                                                                                     | 150 |
|        | $\text{Li}_3\text{TmI}_6$                 | $0.1875 \text{ Li}_5\text{MnCoNi}_3\text{O}_{10} + 0.8125 \text{ Li}_3\text{TmI}_6 \rightarrow 0.1875 \text{ LiCoO}_2 + 0.1875 \text{ TmMnO}_3 + 0.5625 \text{ NiI}_2 + 3.188 \text{ LiI} + 0.3125 \text{ Tm}_2\text{O}_3 + 0.5625 \text{ I}$                                                                                                              | 137 |
|        | $\text{Li}_3\text{ErI}_6$                 | $0.1875 \text{ Li}_5\text{MnCoNi}_3\text{O}_{10} + 0.8125 \text{ Li}_3\text{ErI}_6 \rightarrow 0.1875 \text{ LiCoO}_2 + 0.1875 \text{ ErMnO}_3 + 0.5625 \text{ NiI}_2 + 3.188 \text{ LiI} + 0.3125 \text{ Er}_2\text{O}_3 + 0.5625 \text{ I}$                                                                                                              | 129 |
|        | $\text{Li}_3\text{HoI}_6$                 | $0.1875 \text{ Li}_5\text{MnCoNi}_3\text{O}_{10} + 0.8125 \text{ Li}_3\text{HoI}_6 \rightarrow 0.1875 \text{ LiCoO}_2 + 0.1875 \text{ HoMnO}_3 + 0.5625 \text{ NiI}_2 + 3.188 \text{ LiI} + 0.3125 \text{ Ho}_2\text{O}_3 + 0.5625 \text{ I}$                                                                                                              | 120 |
|        | $\text{Li}_3\text{DyI}_6$                 | $0.1875 \text{ Li}_5\text{MnCoNi}_3\text{O}_{10} + 0.8125 \text{ Li}_3\text{DyI}_6 \rightarrow 0.1875 \text{ LiCoO}_2 + 0.1875 \text{ DyMnO}_3 + 0.5625 \text{ NiI}_2 + 3.188 \text{ LiI} + 0.3125 \text{ Dy}_2\text{O}_3 + 0.5625 \text{ I}$                                                                                                              | 114 |
|        | $\text{Li}_3\text{TbI}_6$                 | $0.8065 \text{ Li}_3\text{TbI}_6 + 0.1935 \text{ Li}_5\text{MnCoNi}_3\text{O}_{10} \rightarrow 0.1935 \text{ LiCoO}_2 + 0.09677 \text{ TbMn}_2\text{O}_5 + 0.5806 \text{ NiI}_2 + 3.194 \text{ LiI} + 0.3548 \text{ Tb}_2\text{O}_3 + 0.4839 \text{ I}$                                                                                                    | 107 |
|        | $\text{Li}_3\text{SmI}_6$                 | $0.1429 \text{ Li}_5\text{MnCoNi}_3\text{O}_{10} + 0.8571 \text{ Li}_3\text{SmI}_6 \rightarrow 0.1429 \text{ LiCoO}_2 + 0.07143 \text{ SmMn}_2\text{O}_5 + 0.4286 \text{ NiI}_2 + 0.7857 \text{ SmIO} + 3.143 \text{ LiI} + 0.3571 \text{ I}$                                                                                                              | 98  |
|        | $\text{Li}_3\text{PS}_4$                  | $0.1739 \text{ Li}_{10}\text{MnCo}(\text{Ni}_2\text{O}_5)_4 + 0.8261 \text{ Li}_3\text{PS}_4 \rightarrow 0.1739 \text{ Co}(\text{NiS}_2)_2 + 0.04348 \text{ Li}_2\text{SO}_4 + 0.3478 \text{ Ni}_3\text{S}_4 + 0.1739 \text{ MnS}_2 + 0.8261 \text{ Li}_2\text{S} + 0.8261 \text{ Li}_3\text{PO}_4$                                                        | 477 |
| NMC811 | $\text{Li}_{10}\text{GeP}_2\text{S}_{12}$ | $0.439 \text{ Li}_{10}\text{MnCo}(\text{Ni}_2\text{O}_5)_4 + 0.561 \text{ Li}_{10}\text{Ge}(\text{PS}_6)_2 \rightarrow 0.122 \text{ Li}_4\text{GeO}_4 + 0.439 \text{ Co}(\text{NiS}_2)_2 + 0.439 \text{ Li}_2\text{MnGeO}_4 + 0.5122 \text{ Li}_2\text{SO}_4 + 0.2927 \text{ Ni}_9\text{S}_8 + 2.122 \text{ Li}_2\text{S} + 1.122 \text{ Li}_3\text{PO}_4$ | 414 |
|        | $\text{Li}_6\text{PS}_5\text{Cl}$         | $0.7818 \text{ Li}_6\text{PS}_5\text{Cl} + 0.2182 \text{ Li}_{10}\text{MnCo}(\text{Ni}_2\text{O}_5)_4 \rightarrow 0.2182 \text{ Co}(\text{NiS}_2)_2 + 0.2545 \text{ Li}_2\text{SO}_4 + 0.1455 \text{ Ni}_9\text{S}_8 + 0.2182 \text{ MnO} + 1.618 \text{ Li}_2\text{S} + 0.7818 \text{ LiCl} + 0.7818 \text{ Li}_3\text{PO}_4$                             | 419 |



|                                                            |                                                                                                                                                                                                                                                                                                                                                                         |     |
|------------------------------------------------------------|-------------------------------------------------------------------------------------------------------------------------------------------------------------------------------------------------------------------------------------------------------------------------------------------------------------------------------------------------------------------------|-----|
| $\text{Li}_7\text{La}_3\text{Zr}_2\text{O}_{12}$           | $0.4 \text{Li}_7\text{La}_3\text{Zr}_2\text{O}_{12} + 0.6 \text{Li}_{10}\text{MnCo}(\text{Ni}_2\text{O}_5)_4 \rightarrow 4.4 \text{LiNiO}_2$<br>$+ 0.4 \text{Li}_5\text{NiO}_4 + 0.4 \text{Li}_6\text{Zr}_2\text{O}_7 + 0.6 \text{La}_2\text{MnCoO}_6$                                                                                                                  | 42  |
| $\text{LiGaO}_2$                                           | $\text{LiGaO}_2 \rightarrow \text{LiGaO}_2$                                                                                                                                                                                                                                                                                                                             | 0   |
| $\text{Li}_2\text{La}_2\text{Ti}_3\text{O}_{10}$           | $0.5 \text{Li}_{10}\text{MnCo}(\text{Ni}_2\text{O}_5)_4 + 0.5 \text{Li}_2\text{La}_2\text{Ti}_3\text{O}_{10} \rightarrow 0.5$<br>$\text{Li}(\text{NiO}_2)_2 + 0.125 \text{Li}_9\text{Ni}_2\text{O}_4 + 0.125 \text{LiNiO}_2 + 1.5$<br>$\text{Li}_2\text{TiO}_3 + 0.5 \text{La}_2\text{MnCoO}_6$                                                                         | 54  |
| $\text{Li}_3\text{InCl}_6$                                 | $0.2571 \text{Li}_{10}\text{MnCo}(\text{Ni}_2\text{O}_5)_4 + 0.7429 \text{Li}_3\text{InCl}_6 \rightarrow 0.06857$<br>$\text{Li}_2\text{Mn}_3\text{NiO}_8 + 0.05143 \text{Li}_4\text{MnCo}_5\text{O}_{12} + 0.2186 \text{LiClO}_4 +$<br>$0.3714 \text{In}_2\text{O}_3 + 4.239 \text{LiCl} + 1.989 \text{NiO}$                                                            | 58  |
| $\text{Li}_3\text{BiCl}_6$                                 | $0.1875 \text{Li}_{10}\text{MnCo}(\text{Ni}_2\text{O}_5)_4 + 0.8125 \text{Li}_3\text{BiCl}_6 \rightarrow 0.05$<br>$\text{Li}_2\text{Mn}_3\text{NiO}_8 + 0.1594 \text{LiClO}_4 + 0.0375 \text{Li}_4\text{MnCo}_5\text{O}_{12} +$<br>$1.45 \text{NiO} + 0.8125 \text{BiClO} + 3.903 \text{LiCl}$                                                                          | 67  |
| $\text{Li}_3\text{ScCl}_6$                                 | $0.2459 \text{Li}_{10}\text{MnCo}(\text{Ni}_2\text{O}_5)_4 + 0.7541 \text{Li}_3\text{ScCl}_6 \rightarrow 0.1967$<br>$\text{Mn}(\text{Ni}_3\text{O}_4)_2 + 0.209 \text{LiClO}_4 + 0.04918 \text{Li}_4\text{MnCo}_5\text{O}_{12} +$<br>$0.7869 \text{NiO} + 4.316 \text{LiCl} + 0.377 \text{Sc}_2\text{O}_3$                                                              | 101 |
| $\text{Li}_3\text{LuCl}_6$                                 | $0.2459 \text{Li}_{10}\text{MnCo}(\text{Ni}_2\text{O}_5)_4 + 0.7541 \text{Li}_3\text{LuCl}_6 \rightarrow 0.09836$<br>$\text{Lu}_2\text{Mn}_2\text{O}_7 + 0.209 \text{LiClO}_4 + 0.04918 \text{Li}_4\text{MnCo}_5\text{O}_{12} +$<br>$0.2787 \text{Lu}_2\text{O}_3 + 4.316 \text{LiCl} + 1.967 \text{NiO}$                                                               | 99  |
| $\text{Li}_3\text{TmCl}_6$                                 | $0.1923 \text{Li}_{10}\text{MnCo}(\text{Ni}_2\text{O}_5)_4 + 0.8077 \text{Li}_3\text{TmCl}_6 \rightarrow 0.03846$<br>$\text{Li}_4\text{MnCo}_5\text{O}_{12} + 0.07692 \text{Tm}_2\text{Mn}_2\text{O}_7 + 0.1635 \text{LiClO}_4 +$<br>$4.029 \text{LiCl} + 0.6538 \text{TmClO} + 1.538 \text{NiO}$                                                                       | 89  |
| $\text{Li}_3\text{ErCl}_6$                                 | $0.2459 \text{Li}_{10}\text{MnCo}(\text{Ni}_2\text{O}_5)_4 + 0.7541 \text{Li}_3\text{ErCl}_6 \rightarrow 0.04918$<br>$\text{Li}_4\text{MnCo}_5\text{O}_{12} + 0.09836 \text{Er}_2\text{Mn}_2\text{O}_7 + 0.209 \text{LiClO}_4 +$<br>$0.2787 \text{Er}_2\text{O}_3 + 4.316 \text{LiCl} + 1.967 \text{NiO}$                                                               | 88  |
| $\text{Li}_3\text{YCl}_6$                                  | $0.2083 \text{Li}_{10}\text{MnCo}(\text{Ni}_2\text{O}_5)_4 + 0.7917 \text{Li}_3\text{YCl}_6 \rightarrow 0.04167$<br>$\text{Li}_4\text{MnCo}_5\text{O}_{12} + 0.1667 \text{Y}_2\text{MnNiO}_6 + 0.4583 \text{YClO} +$<br>$0.1771 \text{LiClO}_4 + 1.5 \text{NiO} + 4.115 \text{LiCl}$                                                                                    | 71  |
| $\text{Li}_3\text{HoCl}_6$                                 | $0.2459 \text{Li}_{10}\text{MnCo}(\text{Ni}_2\text{O}_5)_4 + 0.7541 \text{Li}_3\text{HoCl}_6 \rightarrow 0.04918$<br>$\text{Li}_4\text{MnCo}_5\text{O}_{12} + 0.1967 \text{Ho}_2\text{MnNiO}_6 + 0.209 \text{LiClO}_4 +$<br>$0.1803 \text{Ho}_2\text{O}_3 + 4.316 \text{LiCl} + 1.77 \text{NiO}$                                                                        | 89  |
| $\text{Li}_3\text{DyCl}_6$                                 | $0.8214 \text{Li}_3\text{DyCl}_6 + 0.1786 \text{Li}_{10}\text{MnCo}(\text{Ni}_2\text{O}_5)_4 \rightarrow 0.03571$<br>$\text{Li}_4\text{MnCo}_5\text{O}_{12} + 0.1429 \text{Mn}(\text{Ni}_3\text{O}_4)_2 + 0.1518 \text{LiClO}_4 +$<br>$3.955 \text{LiCl} + 0.8214 \text{DyClO} + 0.5714 \text{NiO}$                                                                     | 82  |
| $\text{Li}_3\text{TbCl}_6$                                 | $0.2459 \text{Li}_{10}\text{MnCo}(\text{Ni}_2\text{O}_5)_4 + 0.7541 \text{Li}_3\text{TbCl}_6 \rightarrow 0.1967$<br>$\text{Tb}_2\text{MnNiO}_6 + 0.209 \text{LiClO}_4 + 0.04918 \text{Li}_4\text{MnCo}_5\text{O}_{12} +$<br>$0.1803 \text{Tb}_2\text{O}_3 + 4.316 \text{LiCl} + 1.77 \text{NiO}$                                                                        | 75  |
| $\text{Li}_3\text{SmCl}_6$                                 | $0.1786 \text{Li}_{10}\text{MnCo}(\text{Ni}_2\text{O}_5)_4 + 0.8214 \text{Li}_3\text{SmCl}_6 \rightarrow 0.1429$<br>$\text{Mn}(\text{Ni}_3\text{O}_4)_2 + 0.03571 \text{Li}_4\text{MnCo}_5\text{O}_{12} + 0.1518 \text{LiClO}_4 +$<br>$3.955 \text{LiCl} + 0.8214 \text{SmClO} + 0.5714 \text{NiO}$                                                                     | 83  |
| $\text{Li}_2\text{ZrCl}_6$                                 | $0.1422 \text{Li}_{10}\text{MnCo}(\text{Ni}_2\text{O}_5)_4 + 0.8578 \text{Li}_2\text{ZrCl}_6 \rightarrow 0.03791$<br>$\text{Li}_2\text{Mn}_3\text{NiO}_8 + 0.02844 \text{Li}_4\text{MnCo}_5\text{O}_{12} + 0.1209 \text{LiClO}_4 +$<br>$1.1 \text{NiCl}_2 + 2.827 \text{LiCl} + 0.8578 \text{ZrO}_2$                                                                    | 143 |
| $\text{Li}_{2.5}\text{In}_{0.5}\text{Zr}_{0.5}\text{Cl}_6$ | $0.2459 \text{Li}_{10}\text{MnCo}(\text{Ni}_2\text{O}_5)_4 + 0.7541 \text{Li}_{2.5}\text{Zr}_{0.5}\text{In}_{0.5}\text{Cl}_6 \rightarrow$<br>$0.04918 \text{Li}_4\text{MnCo}_5\text{O}_{12} + 0.377 \text{InClO} + 0.1967$<br>$\text{Mn}(\text{Ni}_3\text{O}_4)_2 + 0.209 \text{LiClO}_4 + 0.7869 \text{NiO} + 3.939 \text{LiCl} +$<br>$0.377 \text{ZrO}_2$             | 99  |
| $\text{Li}_{2.5}\text{Sc}_{0.5}\text{Zr}_{0.5}\text{Cl}_6$ | $0.2756 \text{Li}_{10}\text{MnCo}(\text{Ni}_2\text{O}_5)_4 + 0.7244 \text{Li}_{2.5}\text{Zr}_{0.5}\text{Sc}_{0.5}\text{Cl}_6 \rightarrow$<br>$0.2205 \text{Mn}(\text{Ni}_3\text{O}_4)_2 + 0.05512 \text{Li}_4\text{MnCo}_5\text{O}_{12} + 0.8819$<br>$\text{NiO} + 0.2343 \text{LiClO}_4 + 0.3622 \text{ZrO}_2 + 4.112 \text{LiCl} +$<br>$0.1811 \text{Sc}_2\text{O}_3$ | 116 |
| $\text{Li}_{2.5}\text{Y}_{0.5}\text{Zr}_{0.5}\text{Cl}_6$  | $0.2459 \text{Li}_{10}\text{MnCo}(\text{Ni}_2\text{O}_5)_4 + 0.7541 \text{Li}_{2.5}\text{Y}_{0.5}\text{Zr}_{0.5}\text{Cl}_6 \rightarrow$<br>$0.04918 \text{Li}_4\text{MnCo}_5\text{O}_{12} + 0.209 \text{LiClO}_4 + 0.1967$<br>$\text{Mn}(\text{Ni}_3\text{O}_4)_2 + 0.7869 \text{NiO} + 0.377 \text{ZrO}_2 + 0.377 \text{YClO} +$<br>$3.939 \text{LiCl}$               | 108 |
| $\text{Li}_{2.5}\text{Er}_{0.5}\text{Zr}_{0.5}\text{Cl}_6$ | $0.2756 \text{Li}_{10}\text{MnCo}(\text{Ni}_2\text{O}_5)_4 + 0.7244 \text{Li}_{2.5}\text{Er}_{0.5}\text{Zr}_{0.5}\text{Cl}_6 \rightarrow$<br>$0.2205 \text{Mn}(\text{Ni}_3\text{O}_4)_2 + 0.09055 \text{ZrO}_2 + 0.09055 \text{Er}_4\text{Zr}_3\text{O}_{12}$                                                                                                           | 115 |

|                                       |                                                                                                                                                                                                                                                                                                                                                               |     |
|---------------------------------------|---------------------------------------------------------------------------------------------------------------------------------------------------------------------------------------------------------------------------------------------------------------------------------------------------------------------------------------------------------------|-----|
|                                       | $+ 0.05512 \text{ Li}_4\text{MnCo}_5\text{O}_{12} + 0.8819 \text{ NiO} + 0.2343 \text{ LiClO}_4$<br>$+ 4.112 \text{ LiCl}$                                                                                                                                                                                                                                    |     |
| $\text{Li}_3\text{BiCl}_3\text{Br}_3$ | $0.7917 \text{ Li}_3\text{Bi}(\text{BrCl})_3 + 0.2083 \text{ Li}_{10}\text{MnCo}(\text{Ni}_2\text{O}_5)_4 \rightarrow$<br>$0.04167 \text{ Li}_4\text{MnCo}_5\text{O}_{12} + 0.1667 \text{ Li}_2\text{MnO}_3 + 0.1771$<br>$\text{LiClO}_4 + 1.583 \text{ LiBr} + 0.7917 \text{ BiBrO} + 1.667 \text{ NiO} +$<br>$2.198 \text{ LiCl}$                           | 29  |
| $\text{Li}_3\text{ScCl}_3\text{Br}_3$ | $0.1106 \text{ Li}_{10}\text{MnCo}(\text{Ni}_2\text{O}_5)_4 + 0.8894 \text{ Li}_3\text{Sc}(\text{BrCl})_3 \rightarrow$<br>$0.02211 \text{ Li}_4\text{MnCo}_5\text{O}_{12} + 0.02948 \text{ Li}_2\text{Mn}_3\text{NiO}_8 + 0.09398$<br>$\text{LiClO}_4 + 0.855 \text{ NiBr}_2 + 2.574 \text{ LiCl} + 0.9582 \text{ LiBr} +$<br>$0.4447 \text{ Sc}_2\text{O}_3$ | 103 |
| $\text{Li}_3\text{LuCl}_3\text{Br}_3$ | $0.1064 \text{ Li}_{10}\text{MnCo}(\text{Ni}_2\text{O}_5)_4 + 0.8936 \text{ Li}_3\text{Lu}(\text{BrCl})_3 \rightarrow$<br>$0.02128 \text{ Li}_4\text{MnCo}_5\text{O}_{12} + 0.09043 \text{ LiClO}_4 + 0.04255$<br>$\text{Lu}_2\text{Mn}_2\text{O}_7 + 0.8511 \text{ NiBr}_2 + 0.9787 \text{ LiBr} + 2.59 \text{ LiCl} +$<br>$0.4043 \text{ Lu}_2\text{O}_3$   | 106 |
| $\text{Li}_3\text{TmCl}_3\text{Br}_3$ | $0.07576 \text{ Li}_{10}\text{MnCo}(\text{Ni}_2\text{O}_5)_4 + 0.9242 \text{ Li}_3\text{Tm}(\text{BrCl})_3 \rightarrow$<br>$0.01515 \text{ Li}_4\text{MnCo}_5\text{O}_{12} + 0.06439 \text{ LiClO}_4 + 0.0303$<br>$\text{Tm}_2\text{Mn}_2\text{O}_7 + 0.8636 \text{ TmClO} + 0.6061 \text{ NiBr}_2 + 1.845$<br>$\text{LiCl} + 1.561 \text{ LiBr}$             | 92  |
| $\text{Li}_3\text{ErCl}_3\text{Br}_3$ | $0.07576 \text{ Li}_{10}\text{MnCo}(\text{Ni}_2\text{O}_5)_4 + 0.9242 \text{ Li}_3\text{Er}(\text{BrCl})_3 \rightarrow$<br>$0.0303 \text{ Er}_2\text{Mn}_2\text{O}_7 + 0.01515 \text{ Li}_4\text{MnCo}_5\text{O}_{12} + 0.06439$<br>$\text{LiClO}_4 + 0.697 \text{ LiBr} + 0.6061 \text{ NiBr}_2 + 0.8636 \text{ ErBrO} +$<br>$2.708 \text{ LiCl}$            | 90  |
| $\text{Li}_3\text{YCl}_3\text{Br}_3$  | $0.2083 \text{ Li}_{10}\text{MnCo}(\text{Ni}_2\text{O}_5)_4 + 0.7917 \text{ Li}_3\text{Y}(\text{BrCl})_3 \rightarrow$<br>$0.1667 \text{ Y}_2\text{MnNiO}_6 + 0.1771 \text{ LiClO}_4 + 0.04167$<br>$\text{Li}_4\text{MnCo}_5\text{O}_{12} + 1.5 \text{ NiO} + 2.375 \text{ LiBr} + 0.4583 \text{ YClO} +$<br>$1.74 \text{ LiCl}$                               | 66  |
| $\text{Li}_3\text{HoCl}_3\text{Br}_3$ | $0.08333 \text{ Li}_{10}\text{MnCo}(\text{Ni}_2\text{O}_5)_4 + 0.9167 \text{ Li}_3\text{Ho}(\text{BrCl})_3 \rightarrow$<br>$0.01667 \text{ Li}_4\text{MnCo}_5\text{O}_{12} + 0.07083 \text{ LiClO}_4 + 0.7667 \text{ LiBr}$<br>$+ 0.06667 \text{ Ho}_2\text{MnNiO}_6 + 0.6 \text{ NiBr}_2 + 0.7833 \text{ HoBrO} +$<br>$2.679 \text{ LiCl}$                   | 90  |
| $\text{Li}_3\text{DyCl}_3\text{Br}_3$ | $0.08333 \text{ Li}_{10}\text{MnCo}(\text{Ni}_2\text{O}_5)_4 + 0.9167 \text{ Li}_3\text{Dy}(\text{BrCl})_3 \rightarrow$<br>$0.01667 \text{ Li}_4\text{MnCo}_5\text{O}_{12} + 0.7833 \text{ DyClO} + 0.07083$<br>$\text{LiClO}_4 + 0.6 \text{ NiBr}_2 + 0.06667 \text{ Dy}_2\text{MnNiO}_6 + 1.896 \text{ LiCl}$<br>$+ 1.55 \text{ LiBr}$                      | 83  |
| $\text{Li}_3\text{TbCl}_3\text{Br}_3$ | $0.7541 \text{ Li}_3\text{Tb}(\text{BrCl})_3 + 0.2459 \text{ Li}_{10}\text{MnCo}(\text{Ni}_2\text{O}_5)_4 \rightarrow$<br>$0.04918 \text{ Li}_4\text{MnCo}_5\text{O}_{12} + 0.1967 \text{ Tb}_2\text{MnNiO}_6 + 0.209$<br>$\text{LiClO}_4 + 1.77 \text{ NiO} + 2.053 \text{ LiCl} + 2.262 \text{ LiBr} + 0.1803$<br>$\text{Tb}_2\text{O}_3$                   | 76  |
| $\text{Li}_3\text{InBr}_6$            | $0.2244 \text{ Li}_{10}\text{MnCo}(\text{Ni}_2\text{O}_5)_4 + 0.7756 \text{ Li}_3\text{InBr}_6 \rightarrow$<br>$0.05985 \text{ Li}_2\text{Mn}_3\text{NiO}_8 + 0.1908 \text{ Br}_2\text{O}_3 + 0.04489$<br>$\text{Li}_4\text{MnCo}_5\text{O}_{12} + 0.3878 \text{ In}_2\text{O}_3 + 4.272 \text{ LiBr} + 1.736$<br>$\text{NiO}$                                | 34  |
| $\text{Li}_3\text{BiBr}_6$            | $0.177 \text{ Li}_{10}\text{MnCo}(\text{Ni}_2\text{O}_5)_4 + 0.823 \text{ Li}_3\text{BiBr}_6 \rightarrow 0.0354$<br>$\text{Li}_4\text{MnCo}_5\text{O}_{12} + 0.1416 \text{ Li}_2\text{MnO}_3 + 1.416 \text{ NiO} +$<br>$0.823 \text{ BiBrO} + 0.1504 \text{ Br}_2\text{O}_3 + 3.814 \text{ LiBr}$                                                             | 18  |
| $\text{Li}_3\text{ScBr}_6$            | $0.104 \text{ Li}_{10}\text{MnCo}(\text{Ni}_2\text{O}_5)_4 + 0.896 \text{ Li}_3\text{ScBr}_6 \rightarrow 0.02775$<br>$\text{Li}_2\text{Mn}_3\text{NiO}_8 + 0.02081 \text{ Li}_4\text{MnCo}_5\text{O}_{12} + 0.08844 \text{ Br}_2\text{O}_3$<br>$+ 0.8046 \text{ NiBr}_2 + 3.59 \text{ LiBr} + 0.448 \text{ Sc}_2\text{O}_3$                                   | 115 |
| $\text{Li}_3\text{LuBr}_6$            | $0.1003 \text{ Li}_{10}\text{MnCo}(\text{Ni}_2\text{O}_5)_4 + 0.8997 \text{ Li}_3\text{LuBr}_6 \rightarrow$<br>$0.08528 \text{ Br}_2\text{O}_3 + 0.02007 \text{ Li}_4\text{MnCo}_5\text{O}_{12} + 0.8027$<br>$\text{NiBr}_2 + 0.04013 \text{ Lu}_2\text{Mn}_2\text{O}_7 + 3.622 \text{ LiBr} + 0.4097$<br>$\text{Lu}_2\text{O}_3$                             | 103 |
| $\text{Li}_3\text{TmBr}_6$            | $0.1003 \text{ Li}_{10}\text{MnCo}(\text{Ni}_2\text{O}_5)_4 + 0.8997 \text{ Li}_3\text{TmBr}_6 \rightarrow$<br>$0.02007 \text{ Li}_4\text{MnCo}_5\text{O}_{12} + 0.8027 \text{ NiBr}_2 + 0.08528$<br>$\text{Br}_2\text{O}_3 + 0.04013 \text{ Tm}_2\text{Mn}_2\text{O}_7 + 3.622 \text{ LiBr} + 0.4097 \text{ T}$<br>$\text{m}_2\text{O}_3$                    | 93  |

---

|                                   |                                                                                                                                                                                                                                                                                                                                                      |     |
|-----------------------------------|------------------------------------------------------------------------------------------------------------------------------------------------------------------------------------------------------------------------------------------------------------------------------------------------------------------------------------------------------|-----|
| Li <sub>3</sub> ErBr <sub>6</sub> | 0.9288 Li <sub>3</sub> ErBr <sub>6</sub> + 0.07117 Li <sub>10</sub> MnCo(Ni <sub>2</sub> O <sub>5</sub> ) <sub>4</sub> →<br>0.0605 Br <sub>2</sub> O <sub>3</sub> + 0.01423 Li <sub>4</sub> MnCo <sub>5</sub> O <sub>12</sub> + 0.02847<br>Er <sub>2</sub> Mn <sub>2</sub> O <sub>7</sub> + 0.5694 NiBr <sub>2</sub> + 0.8719 ErBrO + 3.441<br>LiBr  | 83  |
| Li <sub>3</sub> YBr <sub>6</sub>  | 0.07186 Li <sub>10</sub> MnCo(Ni <sub>2</sub> O <sub>5</sub> ) <sub>4</sub> + 0.9281 Li <sub>3</sub> YBr <sub>6</sub> →<br>0.01916 Li <sub>2</sub> Mn <sub>3</sub> NiO <sub>8</sub> + 0.9281 YBrO + 0.01437<br>Li <sub>4</sub> MnCo <sub>5</sub> O <sub>12</sub> + 0.06108 Br <sub>2</sub> O <sub>3</sub> + 0.5557 NiBr <sub>2</sub> +<br>3.407 LiBr | 74  |
| Li <sub>3</sub> HoBr <sub>6</sub> | 0.07117 Li <sub>10</sub> MnCo(Ni <sub>2</sub> O <sub>5</sub> ) <sub>4</sub> + 0.9288 Li <sub>3</sub> HoBr <sub>6</sub> →<br>0.01423 Li <sub>4</sub> MnCo <sub>5</sub> O <sub>12</sub> + 0.0605 Br <sub>2</sub> O <sub>3</sub> + 0.5694 NiBr <sub>2</sub><br>+ 0.8719 HoBrO + 0.02847 Ho <sub>2</sub> Mn <sub>2</sub> O <sub>7</sub> + 3.441 LiBr     | 87  |
| Li <sub>3</sub> DyBr <sub>6</sub> | 0.2158 Li <sub>10</sub> MnCo(Ni <sub>2</sub> O <sub>5</sub> ) <sub>4</sub> + 0.7842 Li <sub>3</sub> DyBr <sub>6</sub> →<br>0.04317 Li <sub>4</sub> MnCo <sub>5</sub> O <sub>12</sub> + 0.1835 Br <sub>2</sub> O <sub>3</sub> + 0.1727<br>Dy <sub>2</sub> MnNiO <sub>6</sub> + 4.338 LiBr + 0.2194 Dy <sub>2</sub> O <sub>3</sub> + 1.554<br>NiO      | 74  |
| Li <sub>3</sub> TbBr <sub>6</sub> | 0.2158 Li <sub>10</sub> MnCo(Ni <sub>2</sub> O <sub>5</sub> ) <sub>4</sub> + 0.7842 Li <sub>3</sub> TbBr <sub>6</sub> →<br>0.1727 Tb <sub>2</sub> MnNiO <sub>6</sub> + 0.04317 Li <sub>4</sub> MnCo <sub>5</sub> O <sub>12</sub> +<br>0.1835 Br <sub>2</sub> O <sub>3</sub> + 4.338 LiBr + 0.2194 Tb <sub>2</sub> O <sub>3</sub> + 1.554<br>NiO      | 71  |
| Li <sub>3</sub> ScI <sub>6</sub>  | 0.08982 Li <sub>10</sub> MnCo(Ni <sub>2</sub> O <sub>5</sub> ) <sub>4</sub> + 0.9102 Li <sub>3</sub> ScI <sub>6</sub> →<br>0.01796 Li <sub>4</sub> MnCo <sub>5</sub> O <sub>12</sub> + 0.07186 Li <sub>2</sub> MnO <sub>3</sub> + 0.7186<br>NiI <sub>2</sub> + 3.413 LiI + 0.4551 Sc <sub>2</sub> O <sub>3</sub> + 0.6108 I                          | 177 |
| Li <sub>3</sub> LuI <sub>6</sub>  | 0.08333 Li <sub>10</sub> MnCo(Ni <sub>2</sub> O <sub>5</sub> ) <sub>4</sub> + 0.9167 Li <sub>3</sub> LuI <sub>6</sub> →<br>0.08333 LiCoO <sub>2</sub> + 0.08333 LuMnO <sub>3</sub> + 0.6667 NiI <sub>2</sub> +<br>3.5 LiI + 0.4167 Lu <sub>2</sub> O <sub>3</sub> + 0.6667 I                                                                         | 171 |
| Li <sub>3</sub> TmI <sub>6</sub>  | 0.125 Li <sub>10</sub> MnCo(Ni <sub>2</sub> O <sub>5</sub> ) <sub>4</sub> + 0.875 Li <sub>3</sub> TmI <sub>6</sub> → 0.125<br>LiCoO <sub>2</sub> + 0.125 TmMnO <sub>3</sub> + 0.125 Li <sub>5</sub> IO <sub>6</sub> + NiI <sub>2</sub> +<br>3.125 LiI + 0.375 Tm <sub>2</sub> O <sub>3</sub>                                                         | 157 |
| Li <sub>3</sub> ErI <sub>6</sub>  | 0.125 Li <sub>10</sub> MnCo(Ni <sub>2</sub> O <sub>5</sub> ) <sub>4</sub> + 0.875 Li <sub>3</sub> ErI <sub>6</sub> → 0.125<br>LiCoO <sub>2</sub> + 0.125 ErMnO <sub>3</sub> + NiI <sub>2</sub> + 0.125 Li <sub>5</sub> IO <sub>6</sub> +<br>3.125 LiI + 0.375 Er <sub>2</sub> O <sub>3</sub>                                                         | 125 |
| Li <sub>3</sub> HoI <sub>6</sub>  | 0.125 Li <sub>10</sub> MnCo(Ni <sub>2</sub> O <sub>5</sub> ) <sub>4</sub> + 0.875 Li <sub>3</sub> HoI <sub>6</sub> → 0.125<br>LiCoO <sub>2</sub> + 0.125 HoMnO <sub>3</sub> + NiI <sub>2</sub> + 0.125 Li <sub>5</sub> IO <sub>6</sub> +<br>3.125 LiI + 0.375 Ho <sub>2</sub> O <sub>3</sub>                                                         | 142 |
| Li <sub>3</sub> DyI <sub>6</sub>  | 0.1333 Li <sub>10</sub> MnCo(Ni <sub>2</sub> O <sub>5</sub> ) <sub>4</sub> + 0.8667 Li <sub>3</sub> DyI <sub>6</sub> → 0.1333<br>LiCoO <sub>2</sub> + 1.067 NiI <sub>2</sub> + 0.11657 Li <sub>5</sub> IO <sub>6</sub> + 2.95 LiI +<br>0.1333 Li <sub>2</sub> MnO <sub>3</sub> + 0.4333 Dy <sub>2</sub> O <sub>3</sub>                               | 136 |
| Li <sub>3</sub> TbI <sub>6</sub>  | 0.8667 Li <sub>3</sub> TbI <sub>6</sub> + 0.1333 Li <sub>10</sub> MnCo(Ni <sub>2</sub> O <sub>5</sub> ) <sub>4</sub> → 0.1333<br>LiCoO <sub>2</sub> + 0.1333 Tb <sub>2</sub> MnNiO <sub>6</sub> + 0.9333 NiI <sub>2</sub> + 0.1167<br>Li <sub>5</sub> IO <sub>6</sub> + 3.217 LiI + 0.3 Tb <sub>2</sub> O <sub>3</sub>                               | 130 |
| Li <sub>3</sub> SmI <sub>6</sub>  | 0.3636 Li <sub>10</sub> MnCo(Ni <sub>2</sub> O <sub>5</sub> ) <sub>4</sub> + 0.6364 Li <sub>3</sub> SmI <sub>6</sub> →<br>0.3636 LiCoO <sub>2</sub> + 0.3182 Li <sub>5</sub> IO <sub>6</sub> + 2.909 NiO +<br>0.6364 SmIO + 2.864 LiI + 0.3636 Li <sub>2</sub> MnO <sub>3</sub>                                                                      | 118 |

---

**Table S6.** Chemical reactions between  $\text{Li}_3\text{M}_{0.5}\text{M}'_{0.5}\text{Cl}_6$  and eight cathode materials (LiFePO<sub>4</sub> (LFP), LiMn<sub>2</sub>O<sub>4</sub> (LMO), Li(NiMnCo)<sub>1/3</sub>O<sub>2</sub> (NCM), and LiCoO<sub>2</sub> (LCO), NMC532, NMC622, NMC811).

| Cathode                                                | Solid electrolyte                                                                                                                                          | Reaction equation                                                                                                                                                                        | ED<br>(eV/atom) |
|--------------------------------------------------------|------------------------------------------------------------------------------------------------------------------------------------------------------------|------------------------------------------------------------------------------------------------------------------------------------------------------------------------------------------|-----------------|
| LFP                                                    | $\text{Li}_3\text{In}_{0.5}\text{Lu}_{0.5}\text{Cl}_6$                                                                                                     | $0.6667 \text{LiFePO}_4 + 0.3333 \text{Li}_6\text{LuInCl}_{12} \rightarrow 0.3333 \text{Fe}_2\text{PClO}_4 + 0.3333 \text{Li}_3\text{InCl}_6 + 0.3333 \text{LuPO}_4 + 1.667 \text{LiCl}$ | 37              |
|                                                        | $\text{Li}_3\text{In}_{0.5}\text{Tm}_{0.5}\text{Cl}_6$                                                                                                     | $0.6667 \text{LiFePO}_4 + 0.3333 \text{Li}_6\text{TmInCl}_{12} \rightarrow 0.3333 \text{Fe}_2\text{PClO}_4 + 0.3333 \text{Li}_3\text{InCl}_6 + 0.3333 \text{TmPO}_4 + 1.667 \text{LiCl}$ | 31              |
|                                                        | $\text{Li}_3\text{In}_{0.5}\text{Er}_{0.5}\text{Cl}_6$                                                                                                     | $0.6667 \text{LiFePO}_4 + 0.3333 \text{Li}_6\text{ErInCl}_{12} \rightarrow 0.3333 \text{Fe}_2\text{PClO}_4 + 0.3333 \text{Li}_3\text{InCl}_6 + 0.3333 \text{ErPO}_4 + 1.667 \text{LiCl}$ | 33              |
|                                                        | $\text{Li}_3\text{In}_{0.5}\text{Ho}_{0.5}\text{Cl}_6$                                                                                                     | $0.3333 \text{Li}_6\text{HoInCl}_{12} + 0.6667 \text{LiFePO}_4 \rightarrow 0.3333 \text{Fe}_2\text{PClO}_4 + 0.3333 \text{Li}_3\text{InCl}_6 + 0.3333 \text{HoPO}_4 + 1.667 \text{LiCl}$ | 33              |
|                                                        | $\text{Li}_3\text{Bi}_{0.5}\text{Sc}_{0.5}\text{Cl}_6$                                                                                                     | $0.6667 \text{LiFePO}_4 + 0.3333 \text{Li}_6\text{ScBiCl}_{12} \rightarrow 0.3333 \text{Fe}_2\text{PClO}_4 + 0.3333 \text{BiCl}_3 + 0.3333 \text{ScPO}_4 + 2.667 \text{LiCl}$            | 17              |
|                                                        | $\text{Li}_3\text{Bi}_{0.5}\text{Lu}_{0.5}\text{Cl}_6$                                                                                                     | $0.6667 \text{LiFePO}_4 + 0.3333 \text{Li}_6\text{LuBiCl}_{12} \rightarrow 0.3333 \text{Fe}_2\text{PClO}_4 + 0.3333 \text{BiCl}_3 + 0.3333 \text{LuPO}_4 + 2.667 \text{LiCl}$            | 37              |
|                                                        | $\text{Li}_3\text{Bi}_{0.5}\text{Tm}_{0.5}\text{Cl}_6$                                                                                                     | $0.6667 \text{LiFePO}_4 + 0.3333 \text{Li}_6\text{TmBiCl}_{12} \rightarrow 0.3333 \text{Fe}_2\text{PClO}_4 + 0.3333 \text{BiCl}_3 + 0.3333 \text{TmPO}_4 + 2.667 \text{LiCl}$            | 31              |
|                                                        | $\text{Li}_3\text{Bi}_{0.5}\text{Er}_{0.5}\text{Cl}_6$                                                                                                     | $0.6667 \text{LiFePO}_4 + 0.3333 \text{Li}_6\text{ErBiCl}_{12} \rightarrow 0.3333 \text{Fe}_2\text{PClO}_4 + 0.3333 \text{BiCl}_3 + 0.3333 \text{ErPO}_4 + 2.667 \text{LiCl}$            | 33              |
|                                                        | $\text{Li}_3\text{Bi}_{0.5}\text{Y}_{0.5}\text{Cl}_6$                                                                                                      | $0.3333 \text{Li}_6\text{YBiCl}_{12} + 0.6667 \text{LiFePO}_4 \rightarrow 0.3333 \text{Fe}_2\text{PClO}_4 + 0.3333 \text{BiCl}_3 + 0.3333 \text{YPO}_4 + 2.667 \text{LiCl}$              | 20              |
|                                                        | $\text{Li}_3\text{Bi}_{0.5}\text{Ho}_{0.5}\text{Cl}_6$                                                                                                     | $0.3333 \text{Li}_6\text{HoBiCl}_{12} + 0.6667 \text{LiFePO}_4 \rightarrow 0.3333 \text{Fe}_2\text{PClO}_4 + 0.3333 \text{BiCl}_3 + 0.3333 \text{HoPO}_4 + 2.667 \text{LiCl}$            | 33              |
|                                                        | $\text{Li}_3\text{Bi}_{0.5}\text{Dy}_{0.5}\text{Cl}_6$                                                                                                     | $0.3333 \text{Li}_6\text{DyBiCl}_{12} + 0.6667 \text{LiFePO}_4 \rightarrow 0.3333 \text{Fe}_2\text{PClO}_4 + 0.3333 \text{BiCl}_3 + 0.3333 \text{DyPO}_4 + 2.667 \text{LiCl}$            | 28              |
|                                                        | $\text{Li}_3\text{Bi}_{0.5}\text{Tb}_{0.5}\text{Cl}_6$                                                                                                     | $0.6667 \text{LiFePO}_4 + 0.3333 \text{Li}_6\text{TbBiCl}_{12} \rightarrow 0.3333 \text{Fe}_2\text{PClO}_4 + 0.3333 \text{BiCl}_3 + 0.3333 \text{TbPO}_4 + 2.667 \text{LiCl}$            | 26              |
|                                                        | $\text{Li}_3\text{Bi}_{0.5}\text{Sm}_{0.5}\text{Cl}_6$                                                                                                     | $0.6667 \text{LiFePO}_4 + 0.3333 \text{Li}_6\text{SmBiCl}_{12} \rightarrow 0.3333 \text{Fe}_2\text{PClO}_4 + 0.3333 \text{BiCl}_3 + 0.3333 \text{SmPO}_4 + 2.667 \text{LiCl}$            | 27              |
|                                                        | $\text{Li}_3\text{Sc}_{0.5}\text{Lu}_{0.5}\text{Cl}_6$                                                                                                     | $0.8 \text{LiFePO}_4 + 0.2 \text{Li}_6\text{LuScCl}_{12} \rightarrow 0.4 \text{Fe}_2\text{PClO}_4 + 0.2 \text{ScPO}_4 + 0.2 \text{LuPO}_4 + 2 \text{LiCl}$                               | 38              |
|                                                        | $\text{Li}_3\text{Sc}_{0.5}\text{Tm}_{0.5}\text{Cl}_6$                                                                                                     | $0.8 \text{LiFePO}_4 + 0.2 \text{Li}_6\text{TmScCl}_{12} \rightarrow 0.2 \text{ScPO}_4 + 0.4 \text{Fe}_2\text{PClO}_4 + 0.2 \text{TmPO}_4 + 2 \text{LiCl}$                               | 34              |
|                                                        | $\text{Li}_3\text{Sc}_{0.5}\text{Er}_{0.5}\text{Cl}_6$                                                                                                     | $0.2 \text{Li}_6\text{ErScCl}_{12} + 0.8 \text{LiFePO}_4 \rightarrow 0.2 \text{ScPO}_4 + 0.4 \text{Fe}_2\text{PClO}_4 + 0.2 \text{ErPO}_4 + 2 \text{LiCl}$                               | 35              |
|                                                        | $\text{Li}_3\text{Sc}_{0.5}\text{Y}_{0.5}\text{Cl}_6$                                                                                                      | $0.2 \text{Li}_6\text{YScCl}_{12} + 0.8 \text{LiFePO}_4 \rightarrow 0.4 \text{Fe}_2\text{PClO}_4 + 0.2 \text{YPO}_4 + 0.2 \text{ScPO}_4 + 2 \text{LiCl}$                                 | 26              |
|                                                        | $\text{Li}_3\text{Sc}_{0.5}\text{Ho}_{0.5}\text{Cl}_6$                                                                                                     | $0.8 \text{LiFePO}_4 + 0.2 \text{Li}_6\text{HoScCl}_{12} \rightarrow 0.2 \text{ScPO}_4 + 0.4 \text{Fe}_2\text{PClO}_4 + 0.2 \text{HoPO}_4 + 2 \text{LiCl}$                               | 35              |
|                                                        | $\text{Li}_3\text{Sc}_{0.5}\text{Dy}_{0.5}\text{Cl}_6$                                                                                                     | $0.8 \text{LiFePO}_4 + 0.2 \text{Li}_6\text{DyScCl}_{12} \rightarrow 0.2 \text{ScPO}_4 + 0.4 \text{Fe}_2\text{PClO}_4 + 0.2 \text{DyPO}_4 + 2 \text{LiCl}$                               | 31              |
|                                                        | $\text{Li}_3\text{Sc}_{0.5}\text{Tb}_{0.5}\text{Cl}_6$                                                                                                     | $0.8 \text{LiFePO}_4 + 0.2 \text{Li}_6\text{TbScCl}_{12} \rightarrow 0.4 \text{Fe}_2\text{PClO}_4 + 0.2 \text{TbPO}_4 + 0.2 \text{ScPO}_4 + 2 \text{LiCl}$                               | 30              |
| $\text{Li}_3\text{Sc}_{0.5}\text{Sm}_{0.5}\text{Cl}_6$ | $0.8 \text{LiFePO}_4 + 0.2 \text{Li}_6\text{SmScCl}_{12} \rightarrow 0.2 \text{ScPO}_4 + 0.4 \text{Fe}_2\text{PClO}_4 + 0.2 \text{SmPO}_4 + 2 \text{LiCl}$ | 31                                                                                                                                                                                       |                 |
| $\text{Li}_3\text{Lu}_{0.5}\text{Tm}_{0.5}\text{Cl}_6$ | $0.8 \text{LiFePO}_4 + 0.2 \text{Li}_6\text{TmLuCl}_{12} \rightarrow 0.4 \text{Fe}_2\text{PClO}_4 + 0.2 \text{TmPO}_4 + 0.2 \text{LuPO}_4 + 2 \text{LiCl}$ | 48                                                                                                                                                                                       |                 |
| $\text{Li}_3\text{Lu}_{0.5}\text{Er}_{0.5}\text{Cl}_6$ | $0.8 \text{LiFePO}_4 + 0.2 \text{Li}_6\text{ErLuCl}_{12} \rightarrow 0.4 \text{Fe}_2\text{PClO}_4 + 0.2 \text{ErPO}_4 + 0.2 \text{LuPO}_4 + 2 \text{LiCl}$ | 49                                                                                                                                                                                       |                 |
| $\text{Li}_3\text{Lu}_{0.5}\text{Y}_{0.5}\text{Cl}_6$  | $0.8 \text{LiFePO}_4 + 0.2 \text{Li}_6\text{YLuCl}_{12} \rightarrow 0.4 \text{Fe}_2\text{PClO}_4 + 0.2 \text{LuPO}_4 + 0.2 \text{YPO}_4 + 2 \text{LiCl}$   | 40                                                                                                                                                                                       |                 |

|     |                                                        |                                                                                                                                                                                                                                 |    |
|-----|--------------------------------------------------------|---------------------------------------------------------------------------------------------------------------------------------------------------------------------------------------------------------------------------------|----|
|     | $\text{Li}_3\text{Lu}_{0.5}\text{Ho}_{0.5}\text{Cl}_6$ | $0.2 \text{Li}_6\text{HoLuCl}_{12} + 0.8 \text{LiFePO}_4 \rightarrow 0.4 \text{Fe}_2\text{PClO}_4 + 0.2 \text{HoPO}_4 + 0.2 \text{LuPO}_4 + 2 \text{LiCl}$                                                                      | 49 |
|     | $\text{Li}_3\text{Lu}_{0.5}\text{Dy}_{0.5}\text{Cl}_6$ | $0.2 \text{Li}_6\text{DyLuCl}_{12} + 0.8 \text{LiFePO}_4 \rightarrow 0.4 \text{Fe}_2\text{PClO}_4 + 0.2 \text{DyPO}_4 + 0.2 \text{LuPO}_4 + 2 \text{LiCl}$                                                                      | 46 |
|     | $\text{Li}_3\text{Lu}_{0.5}\text{Tb}_{0.5}\text{Cl}_6$ | $0.8 \text{LiFePO}_4 + 0.2 \text{Li}_6\text{TbLuCl}_{12} \rightarrow 0.4 \text{Fe}_2\text{PClO}_4 + 0.2 \text{TbPO}_4 + 0.2 \text{LuPO}_4 + 2 \text{LiCl}$                                                                      | 44 |
|     | $\text{Li}_3\text{Lu}_{0.5}\text{Sm}_{0.5}\text{Cl}_6$ | $0.8 \text{LiFePO}_4 + 0.2 \text{Li}_6\text{SmLuCl}_{12} \rightarrow 0.4 \text{Fe}_2\text{PClO}_4 + 0.2 \text{SmPO}_4 + 0.2 \text{LuPO}_4 + 2 \text{LiCl}$                                                                      | 45 |
|     | $\text{Li}_3\text{Tm}_{0.5}\text{Er}_{0.5}\text{Cl}_6$ | $0.2 \text{Li}_6\text{ErTmCl}_{12} + 0.8 \text{LiFePO}_4 \rightarrow 0.4 \text{Fe}_2\text{PClO}_4 + 0.2 \text{TmPO}_4 + 0.2 \text{ErPO}_4 + 2 \text{LiCl}$                                                                      | 46 |
|     | $\text{Li}_3\text{Tm}_{0.5}\text{Y}_{0.5}\text{Cl}_6$  | $0.2 \text{Li}_6\text{YTmCl}_{12} + 0.8 \text{LiFePO}_4 \rightarrow 0.4 \text{Fe}_2\text{PClO}_4 + 0.2 \text{TmPO}_4 + 0.2 \text{YPO}_4 + 2 \text{LiCl}$                                                                        | 37 |
|     | $\text{Li}_3\text{Tm}_{0.5}\text{Ho}_{0.5}\text{Cl}_6$ | $0.8 \text{LiFePO}_4 + 0.2 \text{Li}_6\text{HoTmCl}_{12} \rightarrow 0.4 \text{Fe}_2\text{PClO}_4 + 0.2 \text{HoPO}_4 + 0.2 \text{TmPO}_4 + 2 \text{LiCl}$                                                                      | 46 |
|     | $\text{Li}_3\text{Tm}_{0.5}\text{Dy}_{0.5}\text{Cl}_6$ | $0.8 \text{LiFePO}_4 + 0.2 \text{Li}_6\text{DyTmCl}_{12} \rightarrow 0.4 \text{Fe}_2\text{PClO}_4 + 0.2 \text{DyPO}_4 + 0.2 \text{TmPO}_4 + 2 \text{LiCl}$                                                                      | 42 |
|     | $\text{Li}_3\text{Tm}_{0.5}\text{Tb}_{0.5}\text{Cl}_6$ | $0.8 \text{LiFePO}_4 + 0.2 \text{Li}_6\text{TbTmCl}_{12} \rightarrow 0.4 \text{Fe}_2\text{PClO}_4 + 0.2 \text{TbPO}_4 + 0.2 \text{TmPO}_4 + 2 \text{LiCl}$                                                                      | 40 |
|     | $\text{Li}_3\text{Tm}_{0.5}\text{Sm}_{0.5}\text{Cl}_6$ | $0.8 \text{LiFePO}_4 + 0.2 \text{Li}_6\text{SmTmCl}_{12} \rightarrow 0.4 \text{Fe}_2\text{PClO}_4 + 0.2 \text{SmPO}_4 + 0.2 \text{TmPO}_4 + 2 \text{LiCl}$                                                                      | 42 |
|     | $\text{Li}_3\text{Er}_{0.5}\text{Y}_{0.5}\text{Cl}_6$  | $0.8 \text{LiFePO}_4 + 0.2 \text{Li}_6\text{YErCl}_{12} \rightarrow 0.4 \text{Fe}_2\text{PClO}_4 + 0.2 \text{ErPO}_4 + 0.2 \text{YPO}_4 + 2 \text{LiCl}$                                                                        | 38 |
|     | $\text{Li}_3\text{Er}_{0.5}\text{Ho}_{0.5}\text{Cl}_6$ | $0.8 \text{LiFePO}_4 + 0.2 \text{Li}_6\text{HoErCl}_{12} \rightarrow 0.4 \text{Fe}_2\text{PClO}_4 + 0.2 \text{HoPO}_4 + 0.2 \text{ErPO}_4 + 2 \text{LiCl}$                                                                      | 47 |
|     | $\text{Li}_3\text{Er}_{0.5}\text{Dy}_{0.5}\text{Cl}_6$ | $0.8 \text{LiFePO}_4 + 0.2 \text{Li}_6\text{DyErCl}_{12} \rightarrow 0.4 \text{Fe}_2\text{PClO}_4 + 0.2 \text{DyPO}_4 + 0.2 \text{ErPO}_4 + 2 \text{LiCl}$                                                                      | 43 |
|     | $\text{Li}_3\text{Er}_{0.5}\text{Tb}_{0.5}\text{Cl}_6$ | $0.8 \text{LiFePO}_4 + 0.2 \text{Li}_6\text{TbErCl}_{12} \rightarrow 0.4 \text{Fe}_2\text{PClO}_4 + 0.2 \text{TbPO}_4 + 0.2 \text{ErPO}_4 + 2 \text{LiCl}$                                                                      | 42 |
|     | $\text{Li}_3\text{Er}_{0.5}\text{Sm}_{0.5}\text{Cl}_6$ | $0.2 \text{Li}_6\text{SmErCl}_{12} + 0.8 \text{LiFePO}_4 \rightarrow 0.4 \text{Fe}_2\text{PClO}_4 + 0.2 \text{SmPO}_4 + 0.2 \text{ErPO}_4 + 2 \text{LiCl}$                                                                      | 43 |
|     | $\text{Li}_3\text{Y}_{0.5}\text{Ho}_{0.5}\text{Cl}_6$  | $0.8 \text{LiFePO}_4 + 0.2 \text{Li}_6\text{YHoCl}_{12} \rightarrow 0.4 \text{Fe}_2\text{PClO}_4 + 0.2 \text{HoPO}_4 + 0.2 \text{YPO}_4 + 2 \text{LiCl}$                                                                        | 38 |
|     | $\text{Li}_3\text{Y}_{0.5}\text{Dy}_{0.5}\text{Cl}_6$  | $0.8 \text{LiFePO}_4 + 0.2 \text{Li}_6\text{DyYCl}_{12} \rightarrow 0.4 \text{Fe}_2\text{PClO}_4 + 0.2 \text{DyPO}_4 + 0.2 \text{YPO}_4 + 2 \text{LiCl}$                                                                        | 34 |
|     | $\text{Li}_3\text{Y}_{0.5}\text{Tb}_{0.5}\text{Cl}_6$  | $0.8 \text{LiFePO}_4 + 0.2 \text{Li}_6\text{TbYCl}_{12} \rightarrow 0.4 \text{Fe}_2\text{PClO}_4 + 0.2 \text{TbPO}_4 + 0.2 \text{YPO}_4 + 2 \text{LiCl}$                                                                        | 32 |
|     | $\text{Li}_3\text{Y}_{0.5}\text{Sm}_{0.5}\text{Cl}_6$  | $0.2 \text{Li}_6\text{SmYCl}_{12} + 0.8 \text{LiFePO}_4 \rightarrow 0.4 \text{Fe}_2\text{PClO}_4 + 0.2 \text{SmPO}_4 + 0.2 \text{YPO}_4 + 2 \text{LiCl}$                                                                        | 34 |
|     | $\text{Li}_3\text{Ho}_{0.5}\text{Dy}_{0.5}\text{Cl}_6$ | $0.8 \text{LiFePO}_4 + 0.2 \text{Li}_6\text{DyHoCl}_{12} \rightarrow 0.4 \text{Fe}_2\text{PClO}_4 + 0.2 \text{DyPO}_4 + 0.2 \text{HoPO}_4 + 2 \text{LiCl}$                                                                      | 43 |
|     | $\text{Li}_3\text{Ho}_{0.5}\text{Tb}_{0.5}\text{Cl}_6$ | $0.2 \text{Li}_6\text{TbHoCl}_{12} + 0.8 \text{LiFePO}_4 \rightarrow 0.4 \text{Fe}_2\text{PClO}_4 + 0.2 \text{TbPO}_4 + 0.2 \text{HoPO}_4 + 2 \text{LiCl}$                                                                      | 41 |
|     | $\text{Li}_3\text{Ho}_{0.5}\text{Sm}_{0.5}\text{Cl}_6$ | $0.2 \text{Li}_6\text{SmHoCl}_{12} + 0.8 \text{LiFePO}_4 \rightarrow 0.4 \text{Fe}_2\text{PClO}_4 + 0.2 \text{SmPO}_4 + 0.2 \text{HoPO}_4 + 2 \text{LiCl}$                                                                      | 43 |
|     | $\text{Li}_3\text{Tb}_{0.5}\text{Tb}_{0.5}\text{Cl}_6$ | $0.2 \text{Li}_6\text{TbDyCl}_{12} + 0.8 \text{LiFePO}_4 \rightarrow 0.4 \text{Fe}_2\text{PClO}_4 + 0.2 \text{TbPO}_4 + 0.2 \text{DyPO}_4 + 2 \text{LiCl}$                                                                      | 38 |
|     | $\text{Li}_3\text{Tb}_{0.5}\text{Dy}_{0.5}\text{Cl}_6$ | $0.8 \text{LiFePO}_4 + 0.2 \text{Li}_6\text{SmDyCl}_{12} \rightarrow 0.4 \text{Fe}_2\text{PClO}_4 + 0.2 \text{SmPO}_4 + 0.2 \text{DyPO}_4 + 2 \text{LiCl}$                                                                      | 39 |
|     | $\text{Li}_3\text{Tb}_{0.5}\text{Sm}_{0.5}\text{Cl}_6$ | $0.8 \text{LiFePO}_4 + 0.2 \text{Li}_6\text{TbSmCl}_{12} \rightarrow 0.4 \text{Fe}_2\text{PClO}_4 + 0.2 \text{SmPO}_4 + 0.2 \text{TbPO}_4 + 2 \text{LiCl}$                                                                      | 38 |
| LCO | $\text{Li}_3\text{In}_{0.5}\text{Lu}_{0.5}\text{Cl}_6$ | $0.7895 \text{LiCoO}_2 + 0.2105 \text{Li}_6\text{LuInCl}_{12} \rightarrow 0.2105 \text{Li}_3\text{InCl}_6 + 0.1579 \text{Li}(\text{CoO}_2)_2 + 0.1579 \text{Co}_3\text{O}_4 + 1.263 \text{LiCl} + 0.1053 \text{Lu}_2\text{O}_3$ | 29 |

---

|                                                        |                                                                                                                                                                                                                                |    |
|--------------------------------------------------------|--------------------------------------------------------------------------------------------------------------------------------------------------------------------------------------------------------------------------------|----|
| $\text{Li}_3\text{In}_{0.5}\text{Tm}_{0.5}\text{Cl}_6$ | $0.7143 \text{LiCoO}_2 + 0.2857 \text{Li}_6\text{TmInCl}_{12} \rightarrow 0.2857 \text{Li}_3\text{InCl}_6 + 0.2857 \text{TmClO} + 0.1429 \text{Li}(\text{CoO}_2)_2 + 0.1429 \text{Co}_3\text{O}_4 + 1.429 \text{LiCl}$         | 27 |
| $\text{Li}_3\text{In}_{0.5}\text{Er}_{0.5}\text{Cl}_6$ | $0.2857 \text{Li}_6\text{ErInCl}_{12} + 0.7143 \text{LiCoO}_2 \rightarrow 0.1429 \text{Li}(\text{CoO}_2)_2 + 0.2857 \text{Li}_3\text{InCl}_6 + 0.2857 \text{ErClO} + 0.1429 \text{Co}_3\text{O}_4 + 1.429 \text{LiCl}$         | 25 |
| $\text{Li}_3\text{In}_{0.5}\text{Ho}_{0.5}\text{Cl}_6$ | $0.2857 \text{Li}_6\text{HoInCl}_{12} + 0.7143 \text{LiCoO}_2 \rightarrow 0.2857 \text{HoClO} + 0.1429 \text{Li}(\text{CoO}_2)_2 + 0.2857 \text{Li}_3\text{InCl}_6 + 0.1429 \text{Co}_3\text{O}_4 + 1.429 \text{LiCl}$         | 24 |
| $\text{Li}_3\text{Bi}_{0.5}\text{Sc}_{0.5}\text{Cl}_6$ | $0.8621 \text{LiCoO}_2 + 0.1379 \text{Li}_6\text{ScBiCl}_{12} \rightarrow 0.1724 \text{Li}(\text{CoO}_2)_2 + 0.1724 \text{Co}_3\text{O}_4 + 0.1379 \text{BiClO} + 1.517 \text{LiCl} + 0.06897 \text{Sc}_2\text{O}_3$           | 29 |
| $\text{Li}_3\text{Bi}_{0.5}\text{Lu}_{0.5}\text{Cl}_6$ | $0.8621 \text{LiCoO}_2 + 0.1379 \text{Li}_6\text{LuBiCl}_{12} \rightarrow 0.1724 \text{Li}(\text{CoO}_2)_2 + 0.1724 \text{Co}_3\text{O}_4 + 0.1379 \text{BiClO} + 1.517 \text{LiCl} + 0.06897 \text{Lu}_2\text{O}_3$           | 31 |
| $\text{Li}_3\text{Bi}_{0.5}\text{Tm}_{0.5}\text{Cl}_6$ | $0.8333 \text{LiCoO}_2 + 0.1667 \text{Li}_6\text{TmBiCl}_{12} \rightarrow 0.1667 \text{Li}(\text{CoO}_2)_2 + 0.1667 \text{TmClO} + 0.1667 \text{Co}_3\text{O}_4 + 0.1667 \text{BiClO} + 1.667 \text{LiCl}$                     | 30 |
| $\text{Li}_3\text{Bi}_{0.5}\text{Er}_{0.5}\text{Cl}_6$ | $0.8333 \text{LiCoO}_2 + 0.1667 \text{Li}_6\text{ErBiCl}_{12} \rightarrow 0.1667 \text{Li}(\text{CoO}_2)_2 + 0.1667 \text{ErClO} + 0.1667 \text{Co}_3\text{O}_4 + 0.1667 \text{BiClO} + 1.667 \text{LiCl}$                     | 29 |
| $\text{Li}_3\text{Bi}_{0.5}\text{Y}_{0.5}\text{Cl}_6$  | $0.1667 \text{Li}_6\text{YBiCl}_{12} + 0.8333 \text{LiCoO}_2 \rightarrow 0.1667 \text{Li}(\text{CoO}_2)_2 + 0.1667 \text{YClO} + 0.1667 \text{Co}_3\text{O}_4 + 0.1667 \text{BiClO} + 1.667 \text{LiCl}$                       | 22 |
| $\text{Li}_3\text{Bi}_{0.5}\text{Ho}_{0.5}\text{Cl}_6$ | $0.1667 \text{Li}_6\text{HoBiCl}_{12} + 0.8333 \text{LiCoO}_2 \rightarrow 0.1667 \text{Li}(\text{CoO}_2)_2 + 0.1667 \text{HoClO} + 0.1667 \text{Co}_3\text{O}_4 + 0.1667 \text{BiClO} + 1.667 \text{LiCl}$                     | 28 |
| $\text{Li}_3\text{Bi}_{0.5}\text{Dy}_{0.5}\text{Cl}_6$ | $0.1667 \text{Li}_6\text{DyBiCl}_{12} + 0.8333 \text{LiCoO}_2 \rightarrow 0.1667 \text{Li}(\text{CoO}_2)_2 + 0.1667 \text{DyClO} + 0.1667 \text{Co}_3\text{O}_4 + 0.1667 \text{BiClO} + 1.667 \text{LiCl}$                     | 27 |
| $\text{Li}_3\text{Bi}_{0.5}\text{Tb}_{0.5}\text{Cl}_6$ | $0.8571 \text{LiCoO}_2 + 0.1429 \text{Li}_6\text{TbBiCl}_{12} \rightarrow 0.1429 \text{Li}(\text{CoO}_2)_2 + 0.1429 \text{TbCoO}_3 + 0.1429 \text{Co}_3\text{O}_4 + 0.1429 \text{BiClO} + 1.571 \text{LiCl}$                   | 18 |
| $\text{Li}_3\text{Bi}_{0.5}\text{Sm}_{0.5}\text{Cl}_6$ | $0.8333 \text{LiCoO}_2 + 0.1667 \text{Li}_6\text{SmBiCl}_{12} \rightarrow 0.1667 \text{Li}(\text{CoO}_2)_2 + 0.1667 \text{SmClO} + 0.1667 \text{Co}_3\text{O}_4 + 0.1667 \text{BiClO} + 1.667 \text{LiCl}$                     | 28 |
| $\text{Li}_3\text{Sc}_{0.5}\text{Lu}_{0.5}\text{Cl}_6$ | $0.8824 \text{LiCoO}_2 + 0.1176 \text{Li}_6\text{LuScCl}_{12} \rightarrow 0.1765 \text{Co}_3\text{O}_4 + 0.05882 \text{Lu}_2\text{O}_3 + 0.1765 \text{Li}(\text{CoO}_2)_2 + 1.412 \text{LiCl} + 0.05882 \text{Sc}_2\text{O}_3$ | 39 |
| $\text{Li}_3\text{Sc}_{0.5}\text{Tm}_{0.5}\text{Cl}_6$ | $0.8621 \text{LiCoO}_2 + 0.1379 \text{Li}_6\text{TmScCl}_{12} \rightarrow 0.1724 \text{Li}(\text{CoO}_2)_2 + 0.1724 \text{Co}_3\text{O}_4 + 1.517 \text{LiCl} + 0.1379 \text{TmClO} + 0.06897 \text{Sc}_2\text{O}_3$           | 39 |
| $\text{Li}_3\text{Sc}_{0.5}\text{Er}_{0.5}\text{Cl}_6$ | $0.1379 \text{Li}_6\text{ErScCl}_{12} + 0.8621 \text{LiCoO}_2 \rightarrow 0.1724 \text{Li}(\text{CoO}_2)_2 + 0.1724 \text{Co}_3\text{O}_4 + 1.517 \text{LiCl} + 0.1379 \text{ErClO} + 0.06897 \text{Sc}_2\text{O}_3$           | 37 |
| $\text{Li}_3\text{Sc}_{0.5}\text{Y}_{0.5}\text{Cl}_6$  | $0.1379 \text{Li}_6\text{YScCl}_{12} + 0.8621 \text{LiCoO}_2 \rightarrow 0.1724 \text{Li}(\text{CoO}_2)_2 + 0.1379 \text{YClO} + 0.1724 \text{Co}_3\text{O}_4 + 1.517 \text{LiCl} + 0.06897 \text{Sc}_2\text{O}_3$             | 31 |
| $\text{Li}_3\text{Sc}_{0.5}\text{Ho}_{0.5}\text{Cl}_6$ | $0.1379 \text{Li}_6\text{HoScCl}_{12} + 0.8621 \text{LiCoO}_2 \rightarrow 0.1724 \text{Li}(\text{CoO}_2)_2 + 0.1724 \text{Co}_3\text{O}_4 + 1.517 \text{LiCl} + 0.1379 \text{HoClO} + 0.06897 \text{Sc}_2\text{O}_3$           | 37 |
| $\text{Li}_3\text{Sc}_{0.5}\text{Dy}_{0.5}\text{Cl}_6$ | $0.8621 \text{LiCoO}_2 + 0.1379 \text{Li}_6\text{DyScCl}_{12} \rightarrow 0.1724 \text{Li}(\text{CoO}_2)_2 + 0.1724 \text{Co}_3\text{O}_4 + 1.517 \text{LiCl} + 0.1379 \text{DyClO} + 0.06897 \text{Sc}_2\text{O}_3$           | 36 |
| $\text{Li}_3\text{Sc}_{0.5}\text{Tb}_{0.5}\text{Cl}_6$ | $0.8788 \text{LiCoO}_2 + 0.1212 \text{Li}_6\text{TbScCl}_{12} \rightarrow 0.1515 \text{Li}(\text{CoO}_2)_2 + 0.1212 \text{TbCoO}_3 + 0.1515 \text{Co}_3\text{O}_4 + 1.455 \text{LiCl} + 0.06061 \text{Sc}_2\text{O}_3$         | 27 |

---

---

|                                                        |                                                                                                                                               |    |
|--------------------------------------------------------|-----------------------------------------------------------------------------------------------------------------------------------------------|----|
|                                                        | $0.8621 \text{ LiCoO}_2 + 0.1379 \text{ Li}_6\text{SmScCl}_{12} \rightarrow 0.1724$                                                           |    |
| $\text{Li}_3\text{Sc}_{0.5}\text{Sm}_{0.5}\text{Cl}_6$ | $\text{Li}(\text{CoO}_2)_2 + 0.1724 \text{ Co}_3\text{O}_4 + 1.517 \text{ LiCl} + 0.1379 \text{ SmClO}$<br>$+ 0.06897 \text{ Sc}_2\text{O}_3$ | 36 |
|                                                        | $0.8621 \text{ LiCoO}_2 + 0.1379 \text{ Li}_6\text{TmLuCl}_{12} \rightarrow 0.1724$                                                           |    |
| $\text{Li}_3\text{Lu}_{0.5}\text{Tm}_{0.5}\text{Cl}_6$ | $\text{Li}(\text{CoO}_2)_2 + 0.1724 \text{ Co}_3\text{O}_4 + 1.517 \text{ LiCl} + 0.1379 \text{ TmClO}$<br>$+ 0.06897 \text{ Lu}_2\text{O}_3$ | 40 |
|                                                        | $0.1379 \text{ Li}_6\text{ErLuCl}_{12} + 0.8621 \text{ LiCoO}_2 \rightarrow 0.1724 \text{ Li}(\text{CoO}_2)_2$                                |    |
| $\text{Li}_3\text{Lu}_{0.5}\text{Er}_{0.5}\text{Cl}_6$ | $+ 0.1724 \text{ Co}_3\text{O}_4 + 1.517 \text{ LiCl} + 0.1379 \text{ ErClO} + 0.06897$<br>$\text{Lu}_2\text{O}_3$                            | 39 |
|                                                        | $0.8621 \text{ LiCoO}_2 + 0.1379 \text{ Li}_6\text{YLuCl}_{12} \rightarrow 0.1724 \text{ Co}_3\text{O}_4 +$                                   |    |
| $\text{Li}_3\text{Lu}_{0.5}\text{Y}_{0.5}\text{Cl}_6$  | $0.1724 \text{ Li}(\text{CoO}_2)_2 + 0.1379 \text{ YClO} + 0.06897 \text{ Lu}_2\text{O}_3 +$<br>$1.517 \text{ LiCl}$                          | 33 |
|                                                        | $0.1379 \text{ Li}_6\text{HoLuCl}_{12} + 0.8621 \text{ LiCoO}_2 \rightarrow 0.1724$                                                           |    |
| $\text{Li}_3\text{Lu}_{0.5}\text{Ho}_{0.5}\text{Cl}_6$ | $\text{Li}(\text{CoO}_2)_2 + 0.1724 \text{ Co}_3\text{O}_4 + 1.517 \text{ LiCl} + 0.1379 \text{ HoClO} +$<br>$0.06897 \text{ Lu}_2\text{O}_3$ | 38 |
|                                                        | $0.1379 \text{ Li}_6\text{DyLuCl}_{12} + 0.8621 \text{ LiCoO}_2 \rightarrow 0.1724$                                                           |    |
| $\text{Li}_3\text{Lu}_{0.5}\text{Dy}_{0.5}\text{Cl}_6$ | $\text{Li}(\text{CoO}_2)_2 + 0.1724 \text{ Co}_3\text{O}_4 + 1.517 \text{ LiCl} + 0.1379 \text{ DyClO} +$<br>$0.06897 \text{ Lu}_2\text{O}_3$ | 38 |
|                                                        | $0.7895 \text{ LiCoO}_2 + 0.2105 \text{ Li}_6\text{TbLuCl}_{12} \rightarrow 0.1579 \text{ Li}(\text{CoO}_2)_2$                                |    |
| $\text{Li}_3\text{Lu}_{0.5}\text{Tb}_{0.5}\text{Cl}_6$ | $+ 0.1579 \text{ Co}_3\text{O}_4 + 1.895 \text{ LiCl} + 0.2105 \text{ TbCl}_3 + 0.1053$<br>$\text{Lu}_2\text{O}_3$                            | 29 |
|                                                        | $0.8621 \text{ LiCoO}_2 + 0.1379 \text{ Li}_6\text{SmLuCl}_{12} \rightarrow 0.1724$                                                           |    |
| $\text{Li}_3\text{Lu}_{0.5}\text{Sm}_{0.5}\text{Cl}_6$ | $\text{Li}(\text{CoO}_2)_2 + 0.1724 \text{ Co}_3\text{O}_4 + 1.517 \text{ LiCl} + 0.1379 \text{ SmClO}$<br>$+ 0.06897 \text{ Lu}_2\text{O}_3$ | 38 |
|                                                        | $0.1667 \text{ Li}_6\text{ErTmCl}_{12} + 0.8333 \text{ LiCoO}_2 \rightarrow 0.1667 \text{ ErClO} +$                                           |    |
| $\text{Li}_3\text{Tm}_{0.5}\text{Er}_{0.5}\text{Cl}_6$ | $0.1667 \text{ Li}(\text{CoO}_2)_2 + 0.1667 \text{ Co}_3\text{O}_4 + 1.667 \text{ LiCl} + 0.1667 \text{ T}$<br>$\text{mClO}$                  | 39 |
|                                                        | $0.1667 \text{ Li}_6\text{YTmCl}_{12} + 0.8333 \text{ LiCoO}_2 \rightarrow 0.1667 \text{ Li}(\text{CoO}_2)_2$                                 |    |
| $\text{Li}_3\text{Tm}_{0.5}\text{Y}_{0.5}\text{Cl}_6$  | $+ 0.1667 \text{ YClO} + 0.1667 \text{ Co}_3\text{O}_4 + 1.667 \text{ LiCl} + 0.1667$<br>$\text{TmClO}$                                       | 32 |
|                                                        | $0.1667 \text{ Li}_6\text{HoTmCl}_{12} + 0.8333 \text{ LiCoO}_2 \rightarrow 0.1667$                                                           |    |
| $\text{Li}_3\text{Tm}_{0.5}\text{Ho}_{0.5}\text{Cl}_6$ | $\text{Li}(\text{CoO}_2)_2 + 0.1667 \text{ TmClO} + 0.1667 \text{ Co}_3\text{O}_4 + 1.667 \text{ LiCl}$<br>$+ 0.1667 \text{ HoClO}$           | 38 |
|                                                        | $0.8333 \text{ LiCoO}_2 + 0.1667 \text{ Li}_6\text{DyTmCl}_{12} \rightarrow 0.1667$                                                           |    |
| $\text{Li}_3\text{Tm}_{0.5}\text{Dy}_{0.5}\text{Cl}_6$ | $\text{Li}(\text{CoO}_2)_2 + 0.1667 \text{ TmClO} + 0.1667 \text{ Co}_3\text{O}_4 + 1.667 \text{ LiCl}$<br>$+ 0.1667 \text{ DyClO}$           | 38 |
|                                                        | $0.8571 \text{ LiCoO}_2 + 0.1429 \text{ Li}_6\text{TbTmCl}_{12} \rightarrow 0.1429$                                                           |    |
| $\text{Li}_3\text{Tm}_{0.5}\text{Tb}_{0.5}\text{Cl}_6$ | $\text{Li}(\text{CoO}_2)_2 + 0.1429 \text{ TbCoO}_3 + 0.1429 \text{ TmClO} + 0.1429$<br>$\text{Co}_3\text{O}_4 + 1.571 \text{ LiCl}$          | 27 |
|                                                        | $0.8333 \text{ LiCoO}_2 + 0.1667 \text{ Li}_6\text{SmTmCl}_{12} \rightarrow 0.1667$                                                           |    |
| $\text{Li}_3\text{Tm}_{0.5}\text{Sm}_{0.5}\text{Cl}_6$ | $\text{Li}(\text{CoO}_2)_2 + 0.1667 \text{ TmClO} + 0.1667 \text{ Co}_3\text{O}_4 + 1.667 \text{ LiCl}$<br>$+ 0.1667 \text{ SmClO}$           | 38 |
|                                                        | $0.1667 \text{ Li}_6\text{YErCl}_{12} + 0.8333 \text{ LiCoO}_2 \rightarrow 0.1667 \text{ Li}(\text{CoO}_2)_2$                                 |    |
| $\text{Li}_3\text{Er}_{0.5}\text{Y}_{0.5}\text{Cl}_6$  | $+ 0.1667 \text{ YClO} + 0.1667 \text{ Co}_3\text{O}_4 + 1.667 \text{ LiCl} + 0.1667$<br>$\text{ErClO}$                                       | 31 |
|                                                        | $0.8333 \text{ LiCoO}_2 + 0.1667 \text{ Li}_6\text{HoErCl}_{12} \rightarrow 0.1667 \text{ Li}(\text{CoO}_2)_2$                                |    |
| $\text{Li}_3\text{Er}_{0.5}\text{Ho}_{0.5}\text{Cl}_6$ | $+ 0.1667 \text{ ErClO} + 0.1667 \text{ Co}_3\text{O}_4 + 1.667 \text{ LiCl} + 0.1667$<br>$\text{HoClO}$                                      | 37 |
|                                                        | $0.8333 \text{ LiCoO}_2 + 0.1667 \text{ Li}_6\text{DyErCl}_{12} \rightarrow 0.1667 \text{ Li}(\text{CoO}_2)_2$                                |    |
| $\text{Li}_3\text{Er}_{0.5}\text{Dy}_{0.5}\text{Cl}_6$ | $+ 0.1667 \text{ ErClO} + 0.1667 \text{ Co}_3\text{O}_4 + 1.667 \text{ LiCl} + 0.1667$<br>$\text{DyClO}$                                      | 36 |
|                                                        | $0.8571 \text{ LiCoO}_2 + 0.1429 \text{ Li}_6\text{TbErCl}_{12} \rightarrow 0.1429 \text{ Li}(\text{CoO}_2)_2$                                |    |
| $\text{Li}_3\text{Er}_{0.5}\text{Tb}_{0.5}\text{Cl}_6$ | $+ 0.1429 \text{ TbCoO}_3 + 0.1429 \text{ ErClO} + 0.1429 \text{ Co}_3\text{O}_4 + 1.571$<br>$\text{LiCl}$                                    | 26 |

---

|                                                        |                                                                                                                                                             |    |
|--------------------------------------------------------|-------------------------------------------------------------------------------------------------------------------------------------------------------------|----|
|                                                        | $0.1667 \text{ Li}_6\text{SmErCl}_{12} + 0.8333 \text{ LiCoO}_2 \rightarrow 0.1667$                                                                         |    |
| $\text{Li}_3\text{Er}_{0.5}\text{Sm}_{0.5}\text{Cl}_6$ | $\text{Li}(\text{CoO}_2)_2 + 0.1667 \text{ ErClO} + 0.1667 \text{ Co}_3\text{O}_4 + 1.667 \text{ LiCl} +$<br>$0.1667 \text{ SmClO}$                         | 37 |
|                                                        | $0.8333 \text{ LiCoO}_2 + 0.1667 \text{ Li}_6\text{YHoCl}_{12} \rightarrow 0.1667 \text{ Li}(\text{CoO}_2)_2$                                               |    |
| $\text{Li}_3\text{Y}_{0.5}\text{Ho}_{0.5}\text{Cl}_6$  | $+ 0.1667 \text{ YClO} + 0.1667 \text{ Co}_3\text{O}_4 + 1.667 \text{ LiCl} + 0.1667$<br>$\text{HoClO}$                                                     | 30 |
|                                                        | $0.8333 \text{ LiCoO}_2 + 0.1667 \text{ Li}_6\text{DyYCl}_{12} \rightarrow 0.1667 \text{ Li}(\text{CoO}_2)_2$                                               |    |
| $\text{Li}_3\text{Y}_{0.5}\text{Dy}_{0.5}\text{Cl}_6$  | $+ 0.1667 \text{ YClO} + 0.1667 \text{ Co}_3\text{O}_4 + 1.667 \text{ LiCl} + 0.1667$<br>$\text{DyClO}$                                                     | 29 |
|                                                        | $0.1429 \text{ Li}_6\text{TbYCl}_{12} + 0.8571 \text{ LiCoO}_2 \rightarrow 0.1429 \text{ TbCoO}_3 +$                                                        |    |
| $\text{Li}_3\text{Y}_{0.5}\text{Tb}_{0.5}\text{Cl}_6$  | $0.1429 \text{ Li}(\text{CoO}_2)_2 + 0.1429 \text{ YClO} + 0.1429 \text{ Co}_3\text{O}_4 + 1.571$<br>$\text{LiCl}$                                          | 20 |
|                                                        | $0.1667 \text{ Li}_6\text{SmYCl}_{12} + 0.8333 \text{ LiCoO}_2 \rightarrow 0.1667 \text{ Li}(\text{CoO}_2)_2$                                               |    |
| $\text{Li}_3\text{Y}_{0.5}\text{Sm}_{0.5}\text{Cl}_6$  | $+ 0.1667 \text{ YClO} + 0.1667 \text{ Co}_3\text{O}_4 + 1.667 \text{ LiCl} + 0.1667$<br>$\text{SmClO}$                                                     | 29 |
|                                                        | $0.8333 \text{ LiCoO}_2 + 0.1667 \text{ Li}_6\text{DyHoCl}_{12} \rightarrow 0.1667$                                                                         |    |
| $\text{Li}_3\text{Ho}_{0.5}\text{Dy}_{0.5}\text{Cl}_6$ | $\text{Li}(\text{CoO}_2)_2 + 0.1667 \text{ HoClO} + 0.1667 \text{ Co}_3\text{O}_4 + 1.667 \text{ LiCl} +$<br>$0.1667 \text{ DyClO}$                         | 36 |
|                                                        | $0.1429 \text{ Li}_6\text{TbHoCl}_{12} + 0.8571 \text{ LiCoO}_2 \rightarrow 0.1429 \text{ TbCoO}_3$                                                         |    |
| $\text{Li}_3\text{Ho}_{0.5}\text{Tb}_{0.5}\text{Cl}_6$ | $+ 0.1429 \text{ HoClO} + 0.1429 \text{ Li}(\text{CoO}_2)_2 + 0.1429 \text{ Co}_3\text{O}_4 +$<br>$1.571 \text{ LiCl}$                                      | 25 |
|                                                        | $0.1667 \text{ Li}_6\text{SmHoCl}_{12} + 0.8333 \text{ LiCoO}_2 \rightarrow 0.1667$                                                                         |    |
| $\text{Li}_3\text{Ho}_{0.5}\text{Sm}_{0.5}\text{Cl}_6$ | $\text{Li}(\text{CoO}_2)_2 + 0.1667 \text{ HoClO} + 0.1667 \text{ Co}_3\text{O}_4 + 1.667 \text{ LiCl} +$<br>$0.1667 \text{ SmClO}$                         | 36 |
|                                                        | $0.1429 \text{ Li}_6\text{TbDyCl}_{12} + 0.8571 \text{ LiCoO}_2 \rightarrow 0.1429 \text{ TbCoO}_3$                                                         |    |
| $\text{Li}_3\text{Tb}_{0.5}\text{Dy}_{0.5}\text{Cl}_6$ | $+ 0.1429 \text{ DyClO} + 0.1429 \text{ Li}(\text{CoO}_2)_2 + 0.1429 \text{ Co}_3\text{O}_4 +$<br>$1.571 \text{ LiCl}$                                      | 25 |
|                                                        | $0.8333 \text{ LiCoO}_2 + 0.1667 \text{ Li}_6\text{SmDyCl}_{12} \rightarrow 0.1667$                                                                         |    |
| $\text{Li}_3\text{Tb}_{0.5}\text{Sm}_{0.5}\text{Cl}_6$ | $\text{Li}(\text{CoO}_2)_2 + 0.1667 \text{ DyClO} + 0.1667 \text{ Co}_3\text{O}_4 + 1.667 \text{ LiCl} +$<br>$0.1667 \text{ SmClO}$                         | 35 |
|                                                        | $0.8571 \text{ LiCoO}_2 + 0.1429 \text{ Li}_6\text{TbSmCl}_{12} \rightarrow 0.1429$                                                                         |    |
| $\text{Li}_3\text{Tb}_{0.5}\text{Sm}_{0.5}\text{Cl}_6$ | $\text{Li}(\text{CoO}_2)_2 + 0.1429 \text{ TbCoO}_3 + 0.1429 \text{ Co}_3\text{O}_4 + 1.571 \text{ LiCl}$<br>$+ 0.1429 \text{ SmClO}$                       | 25 |
| <hr/>                                                  |                                                                                                                                                             |    |
|                                                        | $0.2857 \text{ Li}_6\text{LuInCl}_{12} + 0.7143 \text{ LiMn}_2\text{O}_4 \rightarrow 0.2857 \text{ LuMn}_2\text{O}_5$                                       |    |
| $\text{Li}_3\text{In}_{0.5}\text{Lu}_{0.5}\text{Cl}_6$ | $+ 0.2857 \text{ Li}_3\text{InCl}_6 + 0.4762 \text{ MnO}_2 + 0.04762 \text{ Mn}_8\text{Cl}_3\text{O}_{10} +$<br>$1.571 \text{ LiCl}$                        | 24 |
|                                                        | $0.2857 \text{ Li}_6\text{TmInCl}_{12} + 0.7143 \text{ LiMn}_2\text{O}_4 \rightarrow 0.2857$                                                                |    |
| $\text{Li}_3\text{In}_{0.5}\text{Tm}_{0.5}\text{Cl}_6$ | $\text{TmMn}_2\text{O}_5 + 0.04762 \text{ Mn}_8\text{Cl}_3\text{O}_{10} + 0.4762 \text{ MnO}_2 + 0.2857$<br>$\text{Li}_3\text{InCl}_6 + 1.571 \text{ LiCl}$ | 20 |
|                                                        | $0.2857 \text{ Li}_6\text{ErInCl}_{12} + 0.7143 \text{ LiMn}_2\text{O}_4 \rightarrow 0.2857 \text{ ErMn}_2\text{O}_5$                                       |    |
| $\text{Li}_3\text{In}_{0.5}\text{Er}_{0.5}\text{Cl}_6$ | $+ 0.04762 \text{ Mn}_8\text{Cl}_3\text{O}_{10} + 0.4762 \text{ MnO}_2 + 0.2857 \text{ Li}_3\text{InCl}_6 +$<br>$1.571 \text{ LiCl}$                        | 22 |
|                                                        | $0.2857 \text{ Li}_6\text{HoInCl}_{12} + 0.7143 \text{ LiMn}_2\text{O}_4 \rightarrow 0.2857$                                                                |    |
| $\text{Li}_3\text{In}_{0.5}\text{Ho}_{0.5}\text{Cl}_6$ | $\text{HoMn}_2\text{O}_5 + 0.04762 \text{ Mn}_8\text{Cl}_3\text{O}_{10} + 0.4762 \text{ MnO}_2 + 0.2857$<br>$\text{Li}_3\text{InCl}_6 + 1.571 \text{ LiCl}$ | 22 |
|                                                        | $0.3077 \text{ Li}_6\text{ScBiCl}_{12} + 0.6923 \text{ LiMn}_2\text{O}_4 \rightarrow 0.07692$                                                               |    |
| $\text{Li}_3\text{Bi}_{0.5}\text{Sc}_{0.5}\text{Cl}_6$ | $\text{Mn}_8\text{Cl}_3\text{O}_{10} + 0.4615 \text{ MnO}_2 + 0.1538 \text{ Sc}_2\text{Mn}_2\text{O}_7 + 0.3077$<br>$\text{BiCl}_3 + 2.538 \text{ LiCl}$    | 12 |
|                                                        | $0.3077 \text{ Li}_6\text{LuBiCl}_{12} + 0.6923 \text{ LiMn}_2\text{O}_4 \rightarrow 0.07692$                                                               |    |
| $\text{Li}_3\text{Bi}_{0.5}\text{Lu}_{0.5}\text{Cl}_6$ | $\text{Mn}_8\text{Cl}_3\text{O}_{10} + 0.1538 \text{ Lu}_2\text{Mn}_2\text{O}_7 + 0.4615 \text{ MnO}_2 + 2.538$<br>$\text{LiCl} + 0.3077 \text{ BiCl}_3$    | 24 |
|                                                        | $0.2857 \text{ Li}_6\text{TmBiCl}_{12} + 0.7143 \text{ LiMn}_2\text{O}_4 \rightarrow 0.2857$                                                                |    |
| $\text{Li}_3\text{Bi}_{0.5}\text{Tm}_{0.5}\text{Cl}_6$ | $\text{TmMn}_2\text{O}_5 + 0.04762 \text{ Mn}_8\text{Cl}_3\text{O}_{10} + 0.4762 \text{ MnO}_2 + 2.429$                                                     | 20 |

LMO



---

|                                                                     | LiCl + 0.2857 BiCl <sub>3</sub>                                                                                                                                                                                                                                                                |    |
|---------------------------------------------------------------------|------------------------------------------------------------------------------------------------------------------------------------------------------------------------------------------------------------------------------------------------------------------------------------------------|----|
| Li <sub>3</sub> Bi <sub>0.5</sub> Er <sub>0.5</sub> Cl <sub>6</sub> | 0.7143 LiMn <sub>2</sub> O <sub>4</sub> + 0.2857 Li <sub>6</sub> ErBiCl <sub>12</sub> → 0.2857 ErMn <sub>2</sub> O <sub>5</sub><br>+ 0.04762 Mn <sub>8</sub> Cl <sub>3</sub> O <sub>10</sub> + 0.4762 MnO <sub>2</sub> + 2.429 LiCl +<br>0.2857 BiCl <sub>3</sub>                              | 22 |
| Li <sub>3</sub> Bi <sub>0.5</sub> Y <sub>0.5</sub> Cl <sub>6</sub>  | 0.2857 Li <sub>6</sub> YBiCl <sub>12</sub> + 0.7143 LiMn <sub>2</sub> O <sub>4</sub> → 0.04762<br>Mn <sub>8</sub> Cl <sub>3</sub> O <sub>10</sub> + 0.4762 MnO <sub>2</sub> + 0.2857 BiCl <sub>3</sub> + 0.2857<br>YMn <sub>2</sub> O <sub>5</sub> + 2.429 LiCl                                | 11 |
| Li <sub>3</sub> Bi <sub>0.5</sub> Ho <sub>0.5</sub> Cl <sub>6</sub> | 0.2857 Li <sub>6</sub> HoBiCl <sub>12</sub> + 0.7143 LiMn <sub>2</sub> O <sub>4</sub> → 0.4762 MnO <sub>2</sub> +<br>0.04762 Mn <sub>8</sub> Cl <sub>3</sub> O <sub>10</sub> + 2.429 LiCl + 0.2857 HoMn <sub>2</sub> O <sub>5</sub> +<br>0.2857 BiCl <sub>3</sub>                              | 22 |
| Li <sub>3</sub> Bi <sub>0.5</sub> Dy <sub>0.5</sub> Cl <sub>6</sub> | 0.2857 Li <sub>6</sub> DyBiCl <sub>12</sub> + 0.7143 LiMn <sub>2</sub> O <sub>4</sub> → 0.2857<br>DyMn <sub>2</sub> O <sub>5</sub> + 0.4762 MnO <sub>2</sub> + 0.04762 Mn <sub>8</sub> Cl <sub>3</sub> O <sub>10</sub> + 2.429<br>LiCl + 0.2857 BiCl <sub>3</sub>                              | 18 |
| Li <sub>3</sub> Bi <sub>0.5</sub> Tb <sub>0.5</sub> Cl <sub>6</sub> | 0.2857 Li <sub>6</sub> TbBiCl <sub>12</sub> + 0.7143 LiMn <sub>2</sub> O <sub>4</sub> → 0.4762 MnO <sub>2</sub> +<br>0.2857 TbMn <sub>2</sub> O <sub>5</sub> + 0.04762 Mn <sub>8</sub> Cl <sub>3</sub> O <sub>10</sub> + 2.429 LiCl +<br>0.2857 BiCl <sub>3</sub>                              | 16 |
| Li <sub>3</sub> Bi <sub>0.5</sub> Sm <sub>0.5</sub> Cl <sub>6</sub> | 0.2857 Li <sub>6</sub> SmBiCl <sub>12</sub> + 0.7143 LiMn <sub>2</sub> O <sub>4</sub> → 0.2857<br>SmMn <sub>2</sub> O <sub>5</sub> + 0.4762 MnO <sub>2</sub> + 0.04762 Mn <sub>8</sub> Cl <sub>3</sub> O <sub>10</sub> + 2.429<br>LiCl + 0.2857 BiCl <sub>3</sub>                              | 18 |
| Li <sub>3</sub> Sc <sub>0.5</sub> Lu <sub>0.5</sub> Cl <sub>6</sub> | 0.1739 Li <sub>6</sub> LuScCl <sub>12</sub> + 0.8261 LiMn <sub>2</sub> O <sub>4</sub> → 0.1739<br>LuMn <sub>2</sub> O <sub>5</sub> + 0.08696 Sc <sub>2</sub> Mn <sub>2</sub> O <sub>7</sub> + 0.07246 Mn <sub>8</sub> Cl <sub>3</sub> O <sub>10</sub> +<br>0.5507 MnO <sub>2</sub> + 1.87 LiCl | 25 |
| Li <sub>3</sub> Sc <sub>0.5</sub> Tm <sub>0.5</sub> Cl <sub>6</sub> | 0.1739 Li <sub>6</sub> TmScCl <sub>12</sub> + 0.8261 LiMn <sub>2</sub> O <sub>4</sub> → 0.1739<br>TmMn <sub>2</sub> O <sub>5</sub> + 0.07246 Mn <sub>8</sub> Cl <sub>3</sub> O <sub>10</sub> + 0.08696 Sc <sub>2</sub> Mn <sub>2</sub> O <sub>7</sub> +<br>0.5507 MnO <sub>2</sub> + 1.87 LiCl | 22 |
| Li <sub>3</sub> Sc <sub>0.5</sub> Er <sub>0.5</sub> Cl <sub>6</sub> | 0.1739 Li <sub>6</sub> ErScCl <sub>12</sub> + 0.8261 LiMn <sub>2</sub> O <sub>4</sub> → 0.1739 ErMn <sub>2</sub> O <sub>5</sub><br>+ 0.07246 Mn <sub>8</sub> Cl <sub>3</sub> O <sub>10</sub> + 0.08696 Sc <sub>2</sub> Mn <sub>2</sub> O <sub>7</sub> + 0.5507 MnO <sub>2</sub><br>+ 1.87 LiCl | 24 |
| Li <sub>3</sub> Sc <sub>0.5</sub> Y <sub>0.5</sub> Cl <sub>6</sub>  | 0.1739 Li <sub>6</sub> YScCl <sub>12</sub> + 0.8261 LiMn <sub>2</sub> O <sub>4</sub> → 0.08696<br>Sc <sub>2</sub> Mn <sub>2</sub> O <sub>7</sub> + 0.07246 Mn <sub>8</sub> Cl <sub>3</sub> O <sub>10</sub> + 0.1739 YMn <sub>2</sub> O <sub>5</sub> +<br>0.5507 MnO <sub>2</sub> + 1.87 LiCl   | 16 |
| Li <sub>3</sub> Sc <sub>0.5</sub> Ho <sub>0.5</sub> Cl <sub>6</sub> | 0.1739 Li <sub>6</sub> HoScCl <sub>12</sub> + 0.8261 LiMn <sub>2</sub> O <sub>4</sub> → 0.1739<br>HoMn <sub>2</sub> O <sub>5</sub> + 0.08696 Sc <sub>2</sub> Mn <sub>2</sub> O <sub>7</sub> + 0.07246 Mn <sub>8</sub> Cl <sub>3</sub> O <sub>10</sub> +<br>0.5507 MnO <sub>2</sub> + 1.87 LiCl | 24 |
| Li <sub>3</sub> Sc <sub>0.5</sub> Dy <sub>0.5</sub> Cl <sub>6</sub> | 0.8261 LiMn <sub>2</sub> O <sub>4</sub> + 0.1739 Li <sub>6</sub> DyScCl <sub>12</sub> → 0.1739<br>DyMn <sub>2</sub> O <sub>5</sub> + 0.07246 Mn <sub>8</sub> Cl <sub>3</sub> O <sub>10</sub> + 0.08696 Sc <sub>2</sub> Mn <sub>2</sub> O <sub>7</sub> +<br>0.5507 MnO <sub>2</sub> + 1.87 LiCl | 21 |
| Li <sub>3</sub> Sc <sub>0.5</sub> Tb <sub>0.5</sub> Cl <sub>6</sub> | 0.1739 Li <sub>6</sub> TbScCl <sub>12</sub> + 0.8261 LiMn <sub>2</sub> O <sub>4</sub> → 0.1739<br>TbMn <sub>2</sub> O <sub>5</sub> + 0.08696 Sc <sub>2</sub> Mn <sub>2</sub> O <sub>7</sub> + 0.07246 Mn <sub>8</sub> Cl <sub>3</sub> O <sub>10</sub> +<br>0.5507 MnO <sub>2</sub> + 1.87 LiCl | 19 |
| Li <sub>3</sub> Sc <sub>0.5</sub> Sm <sub>0.5</sub> Cl <sub>6</sub> | 0.1739 Li <sub>6</sub> SmScCl <sub>12</sub> + 0.8261 LiMn <sub>2</sub> O <sub>4</sub> → 0.5507 MnO <sub>2</sub> +<br>0.08696 Sc <sub>2</sub> Mn <sub>2</sub> O <sub>7</sub> + 0.1739 SmMn <sub>2</sub> O <sub>5</sub> + 0.07246<br>Mn <sub>8</sub> Cl <sub>3</sub> O <sub>10</sub> + 1.87 LiCl | 21 |
| Li <sub>3</sub> Lu <sub>0.5</sub> Tm <sub>0.5</sub> Cl <sub>6</sub> | 0.1667 Li <sub>6</sub> TmLuCl <sub>12</sub> + 0.8333 LiMn <sub>2</sub> O <sub>4</sub> → 0.1667<br>LuMn <sub>2</sub> O <sub>5</sub> + 0.1667 TmMn <sub>2</sub> O <sub>5</sub> + 0.05556 Mn <sub>8</sub> Cl <sub>3</sub> O <sub>10</sub> +<br>0.5556 MnO <sub>2</sub> + 1.833 LiCl               | 30 |
| Li <sub>3</sub> Lu <sub>0.5</sub> Er <sub>0.5</sub> Cl <sub>6</sub> | 0.1667 Li <sub>6</sub> ErLuCl <sub>12</sub> + 0.8333 LiMn <sub>2</sub> O <sub>4</sub> → 0.1667<br>LuMn <sub>2</sub> O <sub>5</sub> + 0.05556 Mn <sub>8</sub> Cl <sub>3</sub> O <sub>10</sub> + 0.1667 ErMn <sub>2</sub> O <sub>5</sub> +<br>0.5556 MnO <sub>2</sub> + 1.833 LiCl               | 32 |
| Li <sub>3</sub> Lu <sub>0.5</sub> Y <sub>0.5</sub> Cl <sub>6</sub>  | 0.7143 LiMn <sub>2</sub> O <sub>4</sub> + 0.2857 Li <sub>6</sub> YLuCl <sub>12</sub> → 0.2857 LuMn <sub>2</sub> O <sub>5</sub><br>+ 0.4762 MnO <sub>2</sub> + 0.04762 Mn <sub>8</sub> Cl <sub>3</sub> O <sub>10</sub> + 0.2857 YCl <sub>3</sub> +<br>2.429 LiCl                                | 24 |
| Li <sub>3</sub> Lu <sub>0.5</sub> Ho <sub>0.5</sub> Cl <sub>6</sub> | 0.1667 Li <sub>6</sub> HoLuCl <sub>12</sub> + 0.8333 LiMn <sub>2</sub> O <sub>4</sub> → 0.1667<br>LuMn <sub>2</sub> O <sub>5</sub> + 0.1667 HoMn <sub>2</sub> O <sub>5</sub> + 0.05556 Mn <sub>8</sub> Cl <sub>3</sub> O <sub>10</sub> +<br>0.5556 MnO <sub>2</sub> + 1.833 LiCl               | 32 |
| Li <sub>3</sub> Lu <sub>0.5</sub> Dy <sub>0.5</sub> Cl <sub>6</sub> | 0.1667 Li <sub>6</sub> DyLuCl <sub>12</sub> + 0.8333 LiMn <sub>2</sub> O <sub>4</sub> → 0.1667                                                                                                                                                                                                 | 29 |

---



|     |                                                                     |                                                                                                                                                                                                                                                                            |     |
|-----|---------------------------------------------------------------------|----------------------------------------------------------------------------------------------------------------------------------------------------------------------------------------------------------------------------------------------------------------------------|-----|
|     |                                                                     | 0.5556 MnO <sub>2</sub> + 1.833 LiCl                                                                                                                                                                                                                                       |     |
|     | Li <sub>3</sub> Ho <sub>0.5</sub> Tb <sub>0.5</sub> Cl <sub>6</sub> | 0.1667 Li <sub>6</sub> TbHoCl <sub>12</sub> + 0.8333 LiMn <sub>2</sub> O <sub>4</sub> → 0.1667 HoMn <sub>2</sub> O <sub>5</sub> + 0.1667 TbMn <sub>2</sub> O <sub>5</sub> + 0.05556 Mn <sub>8</sub> Cl <sub>3</sub> O <sub>10</sub> + 0.5556 MnO <sub>2</sub> + 1.833 LiCl | 26  |
|     | Li <sub>3</sub> Ho <sub>0.5</sub> Sm <sub>0.5</sub> Cl <sub>6</sub> | 0.1667 Li <sub>6</sub> SmHoCl <sub>12</sub> + 0.8333 LiMn <sub>2</sub> O <sub>4</sub> → 0.1667 HoMn <sub>2</sub> O <sub>5</sub> + 0.1667 SmMn <sub>2</sub> O <sub>5</sub> + 0.05556 Mn <sub>8</sub> Cl <sub>3</sub> O <sub>10</sub> + 0.5556 MnO <sub>2</sub> + 1.833 LiCl | 27  |
|     | Li <sub>3</sub> Tb <sub>0.5</sub> Tb <sub>0.5</sub> Cl <sub>6</sub> | 0.1667 Li <sub>6</sub> TbDyCl <sub>12</sub> + 0.8333 LiMn <sub>2</sub> O <sub>4</sub> → 0.05556 Mn <sub>8</sub> Cl <sub>3</sub> O <sub>10</sub> + 0.1667 DyMn <sub>2</sub> O <sub>5</sub> + 0.1667 TbMn <sub>2</sub> O <sub>5</sub> + 0.5556 MnO <sub>2</sub> + 1.833 LiCl | 23  |
|     | Li <sub>3</sub> Tb <sub>0.5</sub> Dy <sub>0.5</sub> Cl <sub>6</sub> | 0.8333 LiMn <sub>2</sub> O <sub>4</sub> + 0.1667 Li <sub>6</sub> SmDyCl <sub>12</sub> → 0.1667 DyMn <sub>2</sub> O <sub>5</sub> + 0.05556 Mn <sub>8</sub> Cl <sub>3</sub> O <sub>10</sub> + 0.1667 SmMn <sub>2</sub> O <sub>5</sub> + 0.5556 MnO <sub>2</sub> + 1.833 LiCl | 24  |
|     | Li <sub>3</sub> Tb <sub>0.5</sub> Sm <sub>0.5</sub> Cl <sub>6</sub> | 0.1667 Li <sub>6</sub> TbSmCl <sub>12</sub> + 0.8333 LiMn <sub>2</sub> O <sub>4</sub> → 0.1667 TbMn <sub>2</sub> O <sub>5</sub> + 0.05556 Mn <sub>8</sub> Cl <sub>3</sub> O <sub>10</sub> + 0.1667 SmMn <sub>2</sub> O <sub>5</sub> + 0.5556 MnO <sub>2</sub> + 1.833 LiCl | 23  |
|     | Li <sub>3</sub> In <sub>0.5</sub> Lu <sub>0.5</sub> Cl <sub>6</sub> | 0.8571 LiNiO <sub>2</sub> + 0.1429 Li <sub>6</sub> LuInCl <sub>12</sub> → 0.1071 LiClO <sub>4</sub> + 0.8571 NiO + 0.07143 In <sub>2</sub> O <sub>3</sub> + 1.607 LiCl + 0.07143 Lu <sub>2</sub> O <sub>3</sub>                                                            | 92  |
|     | Li <sub>3</sub> In <sub>0.5</sub> Tm <sub>0.5</sub> Cl <sub>6</sub> | 0.1429 Li <sub>6</sub> TmInCl <sub>12</sub> + 0.8571 LiNiO <sub>2</sub> → 0.1071 LiClO <sub>4</sub> + 0.8571 NiO + 0.07143 In <sub>2</sub> O <sub>3</sub> + 1.607 LiCl + 0.07143 Tm <sub>2</sub> O <sub>3</sub>                                                            | 86  |
|     | Li <sub>3</sub> In <sub>0.5</sub> Er <sub>0.5</sub> Cl <sub>6</sub> | 0.1429 Li <sub>6</sub> ErInCl <sub>12</sub> + 0.8571 LiNiO <sub>2</sub> → 0.1071 LiClO <sub>4</sub> + 0.8571 NiO + 0.07143 In <sub>2</sub> O <sub>3</sub> + 1.607 LiCl + 0.07143 Er <sub>2</sub> O <sub>3</sub>                                                            | 87  |
|     | Li <sub>3</sub> In <sub>0.5</sub> Ho <sub>0.5</sub> Cl <sub>6</sub> | 0.1429 Li <sub>6</sub> HoInCl <sub>12</sub> + 0.8571 LiNiO <sub>2</sub> → 0.1071 LiClO <sub>4</sub> + 0.8571 NiO + 0.07143 In <sub>2</sub> O <sub>3</sub> + 1.607 LiCl + 0.07143 Ho <sub>2</sub> O <sub>3</sub>                                                            | 86  |
|     | Li <sub>3</sub> Bi <sub>0.5</sub> Sc <sub>0.5</sub> Cl <sub>6</sub> | 0.1667 Li <sub>6</sub> ScBiCl <sub>12</sub> + 0.8333 LiNiO <sub>2</sub> → 0.1042 LiClO <sub>4</sub> + 0.8333 NiO + 0.1667 BiClO + 1.729 LiCl + 0.08333 Sc <sub>2</sub> O <sub>3</sub>                                                                                      | 96  |
|     | Li <sub>3</sub> Bi <sub>0.5</sub> Lu <sub>0.5</sub> Cl <sub>6</sub> | 0.1667 Li <sub>6</sub> LuBiCl <sub>12</sub> + 0.8333 LiNiO <sub>2</sub> → 0.1042 LiClO <sub>4</sub> + 0.8333 NiO + 0.1667 BiClO + 1.729 LiCl + 0.08333 Lu <sub>2</sub> O <sub>3</sub>                                                                                      | 98  |
|     | Li <sub>3</sub> Bi <sub>0.5</sub> Tm <sub>0.5</sub> Cl <sub>6</sub> | 0.8462 LiNiO <sub>2</sub> + 0.1538 Li <sub>6</sub> TmBiCl <sub>12</sub> → 0.07692 TmBi <sub>2</sub> ClO <sub>4</sub> + 0.1058 LiClO <sub>4</sub> + 0.8462 NiO + 1.663 LiCl + 0.03846 Tm <sub>2</sub> O <sub>3</sub>                                                        | 91  |
| LNO | Li <sub>3</sub> Bi <sub>0.5</sub> Er <sub>0.5</sub> Cl <sub>6</sub> | 0.8462 LiNiO <sub>2</sub> + 0.1538 Li <sub>6</sub> ErBiCl <sub>12</sub> → 0.07692 ErBi <sub>2</sub> ClO <sub>4</sub> + 0.1058 LiClO <sub>4</sub> + 0.8462 NiO + 1.663 LiCl + 0.03846 Er <sub>2</sub> O <sub>3</sub>                                                        | 92  |
|     | Li <sub>3</sub> Bi <sub>0.5</sub> Y <sub>0.5</sub> Cl <sub>6</sub>  | 0.1667 Li <sub>6</sub> DyBiCl <sub>12</sub> + 0.8333 LiNiO <sub>2</sub> → 0.1042 LiClO <sub>4</sub> + 0.08333 DyBi <sub>2</sub> ClO <sub>4</sub> + 0.08333 DyClO + 0.8333 NiO + 1.729 LiCl                                                                                 | 87  |
|     | Li <sub>3</sub> Bi <sub>0.5</sub> Ho <sub>0.5</sub> Cl <sub>6</sub> | 0.1538 Li <sub>6</sub> HoBiCl <sub>12</sub> + 0.8462 LiNiO <sub>2</sub> → 0.1058 LiClO <sub>4</sub> + 0.07692 HoBi <sub>2</sub> ClO <sub>4</sub> + 0.8462 NiO + 1.663 LiCl + 0.03846 Ho <sub>2</sub> O <sub>3</sub>                                                        | 92  |
|     | Li <sub>3</sub> Bi <sub>0.5</sub> Dy <sub>0.5</sub> Cl <sub>6</sub> | 0.1667 Li <sub>6</sub> YBiCl <sub>12</sub> + 0.8333 LiNiO <sub>2</sub> → 0.08333 YBi <sub>2</sub> ClO <sub>4</sub> + 0.1042 LiClO <sub>4</sub> + 0.08333 YClO + 0.8333 NiO + 1.729 LiCl                                                                                    | 81  |
|     | Li <sub>3</sub> Bi <sub>0.5</sub> Tb <sub>0.5</sub> Cl <sub>6</sub> | 0.8462 LiNiO <sub>2</sub> + 0.1538 Li <sub>6</sub> TbBiCl <sub>12</sub> → 0.07692 TbBi <sub>2</sub> ClO <sub>4</sub> + 0.1058 LiClO <sub>4</sub> + 0.8462 NiO + 1.663 LiCl + 0.03846 Tb <sub>2</sub> O <sub>3</sub>                                                        | 84  |
|     | Li <sub>3</sub> Bi <sub>0.5</sub> Sm <sub>0.5</sub> Cl <sub>6</sub> | 0.1667 Li <sub>6</sub> SmBiCl <sub>12</sub> + 0.8333 LiNiO <sub>2</sub> → 0.1042 LiClO <sub>4</sub> + 0.08333 SmBi <sub>2</sub> ClO <sub>4</sub> + 0.08333 SmClO + 0.8333 NiO + 1.729 LiCl                                                                                 | 86  |
|     | Li <sub>3</sub> Sc <sub>0.5</sub> Lu <sub>0.5</sub> Cl <sub>6</sub> | 0.1429 Li <sub>6</sub> LuScCl <sub>12</sub> + 0.8571 LiNiO <sub>2</sub> → 0.07143 Lu <sub>2</sub> O <sub>3</sub> + 0.1071 LiClO <sub>4</sub> + 0.8571 NiO + 1.607 LiCl + 0.07143 Sc <sub>2</sub> O <sub>3</sub>                                                            | 112 |

---

|                                                        |                                                                                                                                                                                                                   |     |
|--------------------------------------------------------|-------------------------------------------------------------------------------------------------------------------------------------------------------------------------------------------------------------------|-----|
| $\text{Li}_3\text{Sc}_{0.5}\text{Tm}_{0.5}\text{Cl}_6$ | $0.8333 \text{ LiNiO}_2 + 0.1667 \text{ Li}_6\text{TmScCl}_{12} \rightarrow 0.1042 \text{ LiClO}_4 + 0.8333 \text{ NiO} + 1.729 \text{ LiCl} + 0.1667 \text{ TmClO} + 0.08333 \text{ Sc}_2\text{O}_3$             | 106 |
| $\text{Li}_3\text{Sc}_{0.5}\text{Er}_{0.5}\text{Cl}_6$ | $0.1429 \text{ Li}_6\text{ErScCl}_{12} + 0.8571 \text{ LiNiO}_2 \rightarrow 0.1071 \text{ LiClO}_4 + 0.8571 \text{ NiO} + 0.07143 \text{ Er}_2\text{O}_3 + 1.607 \text{ LiCl} + 0.07143 \text{ Sc}_2\text{O}_3$   | 106 |
| $\text{Li}_3\text{Sc}_{0.5}\text{Y}_{0.5}\text{Cl}_6$  | $0.1667 \text{ Li}_6\text{YScCl}_{12} + 0.8333 \text{ LiNiO}_2 \rightarrow 0.1667 \text{ YClO} + 0.1042 \text{ LiClO}_4 + 0.8333 \text{ NiO} + 1.729 \text{ LiCl} + 0.08333 \text{ Sc}_2\text{O}_3$               | 97  |
| $\text{Li}_3\text{Sc}_{0.5}\text{Ho}_{0.5}\text{Cl}_6$ | $0.1429 \text{ Li}_6\text{HoScCl}_{12} + 0.8571 \text{ LiNiO}_2 \rightarrow 0.04762 \text{ Ho}_3\text{ScO}_6 + 0.1071 \text{ LiClO}_4 + 0.8571 \text{ NiO} + 1.607 \text{ LiCl} + 0.04762 \text{ Sc}_2\text{O}_3$ | 106 |
| $\text{Li}_3\text{Sc}_{0.5}\text{Dy}_{0.5}\text{Cl}_6$ | $0.8333 \text{ LiNiO}_2 + 0.1667 \text{ Li}_6\text{DyScCl}_{12} \rightarrow 0.1042 \text{ LiClO}_4 + 0.8333 \text{ NiO} + 1.729 \text{ LiCl} + 0.1667 \text{ DyClO} + 0.08333 \text{ Sc}_2\text{O}_3$             | 103 |
| $\text{Li}_3\text{Sc}_{0.5}\text{Tb}_{0.5}\text{Cl}_6$ | $0.1429 \text{ Li}_6\text{TbScCl}_{12} + 0.8571 \text{ LiNiO}_2 \rightarrow 0.1071 \text{ LiClO}_4 + 0.07143 \text{ Tb}_2\text{O}_3 + 0.8571 \text{ NiO} + 1.607 \text{ LiCl} + 0.07143 \text{ Sc}_2\text{O}_3$   | 98  |
| $\text{Li}_3\text{Sc}_{0.5}\text{Sm}_{0.5}\text{Cl}_6$ | $0.8333 \text{ LiNiO}_2 + 0.1667 \text{ Li}_6\text{SmScCl}_{12} \rightarrow 0.1042 \text{ LiClO}_4 + 0.8333 \text{ NiO} + 1.729 \text{ LiCl} + 0.1667 \text{ SmClO} + 0.08333 \text{ Sc}_2\text{O}_3$             | 103 |
| $\text{Li}_3\text{Lu}_{0.5}\text{Tm}_{0.5}\text{Cl}_6$ | $0.1667 \text{ Li}_6\text{TmLuCl}_{12} + 0.8333 \text{ LiNiO}_2 \rightarrow 0.1042 \text{ LiClO}_4 + 0.8333 \text{ NiO} + 1.729 \text{ LiCl} + 0.1667 \text{ TmClO} + 0.08333 \text{ Lu}_2\text{O}_3$             | 108 |
| $\text{Li}_3\text{Lu}_{0.5}\text{Er}_{0.5}\text{Cl}_6$ | $0.1429 \text{ Li}_6\text{ErLuCl}_{12} + 0.8571 \text{ LiNiO}_2 \rightarrow 0.1071 \text{ LiClO}_4 + 0.8571 \text{ NiO} + 0.07143 \text{ Er}_2\text{O}_3 + 1.607 \text{ LiCl} + 0.07143 \text{ Lu}_2\text{O}_3$   | 108 |
| $\text{Li}_3\text{Lu}_{0.5}\text{Y}_{0.5}\text{Cl}_6$  | $0.8333 \text{ LiNiO}_2 + 0.1667 \text{ Li}_6\text{YLuCl}_{12} \rightarrow 0.1042 \text{ LiClO}_4 + 0.1667 \text{ YClO} + 0.08333 \text{ Lu}_2\text{O}_3 + 0.8333 \text{ NiO} + 1.729 \text{ LiCl}$               | 99  |
| $\text{Li}_3\text{Lu}_{0.5}\text{Ho}_{0.5}\text{Cl}_6$ | $0.1429 \text{ Li}_6\text{HoLuCl}_{12} + 0.8571 \text{ LiNiO}_2 \rightarrow 0.1071 \text{ LiClO}_4 + 0.8571 \text{ NiO} + 0.07143 \text{ Ho}_2\text{O}_3 + 1.607 \text{ LiCl} + 0.07143 \text{ Lu}_2\text{O}_3$   | 107 |
| $\text{Li}_3\text{Lu}_{0.5}\text{Dy}_{0.5}\text{Cl}_6$ | $0.1667 \text{ Li}_6\text{DyLuCl}_{12} + 0.8333 \text{ LiNiO}_2 \rightarrow 0.1042 \text{ LiClO}_4 + 0.8333 \text{ NiO} + 1.729 \text{ LiCl} + 0.1667 \text{ DyClO} + 0.08333 \text{ Lu}_2\text{O}_3$             | 105 |
| $\text{Li}_3\text{Lu}_{0.5}\text{Tb}_{0.5}\text{Cl}_6$ | $0.1429 \text{ Li}_6\text{TbLuCl}_{12} + 0.8571 \text{ LiNiO}_2 \rightarrow 0.1071 \text{ LiClO}_4 + 0.07143 \text{ Tb}_2\text{O}_3 + 0.8571 \text{ NiO} + 1.607 \text{ LiCl} + 0.07143 \text{ Lu}_2\text{O}_3$   | 100 |
| $\text{Li}_3\text{Lu}_{0.5}\text{Sm}_{0.5}\text{Cl}_6$ | $0.1667 \text{ Li}_6\text{SmLuCl}_{12} + 0.8333 \text{ LiNiO}_2 \rightarrow 0.1042 \text{ LiClO}_4 + 0.8333 \text{ NiO} + 1.729 \text{ LiCl} + 0.1667 \text{ SmClO} + 0.08333 \text{ Lu}_2\text{O}_3$             | 105 |
| $\text{Li}_3\text{Tm}_{0.5}\text{Er}_{0.5}\text{Cl}_6$ | $0.1429 \text{ Li}_6\text{ErTmCl}_{12} + 0.8571 \text{ LiNiO}_2 \rightarrow 0.1071 \text{ LiClO}_4 + 0.8571 \text{ NiO} + 0.07143 \text{ Tm}_2\text{O}_3 + 1.607 \text{ LiCl} + 0.07143 \text{ Er}_2\text{O}_3$   | 102 |
| $\text{Li}_3\text{Tm}_{0.5}\text{Y}_{0.5}\text{Cl}_6$  | $0.1667 \text{ Li}_6\text{YTmCl}_{12} + 0.8333 \text{ LiNiO}_2 \rightarrow 0.1667 \text{ YClO} + 0.1042 \text{ LiClO}_4 + 0.8333 \text{ NiO} + 0.08333 \text{ Tm}_2\text{O}_3 + 1.729 \text{ LiCl}$               | 92  |
| $\text{Li}_3\text{Tm}_{0.5}\text{Ho}_{0.5}\text{Cl}_6$ | $0.1429 \text{ Li}_6\text{HoTmCl}_{12} + 0.8571 \text{ LiNiO}_2 \rightarrow 0.1071 \text{ LiClO}_4 + 0.8571 \text{ NiO} + 0.07143 \text{ Ho}_2\text{O}_3 + 1.607 \text{ LiCl} + 0.07143 \text{ Tm}_2\text{O}_3$   | 101 |
| $\text{Li}_3\text{Tm}_{0.5}\text{Dy}_{0.5}\text{Cl}_6$ | $0.8333 \text{ LiNiO}_2 + 0.1667 \text{ Li}_6\text{DyTmCl}_{12} \rightarrow 0.1042 \text{ LiClO}_4 + 0.8333 \text{ NiO} + 1.729 \text{ LiCl} + 0.1667 \text{ DyClO} + 0.08333 \text{ Tm}_2\text{O}_3$             | 98  |
| $\text{Li}_3\text{Tm}_{0.5}\text{Tb}_{0.5}\text{Cl}_6$ | $0.1429 \text{ Li}_6\text{TbTmCl}_{12} + 0.8571 \text{ LiNiO}_2 \rightarrow 0.1071 \text{ LiClO}_4 + 0.07143 \text{ Tb}_2\text{O}_3 + 0.8571 \text{ NiO} + 1.607 \text{ LiCl} + 0.07143 \text{ Tm}_2\text{O}_3$   | 94  |

---

|        |                                                        | $\text{Tm}_2\text{O}_3$                                                                                                                                                                                                                                                                                                                                      |     |
|--------|--------------------------------------------------------|--------------------------------------------------------------------------------------------------------------------------------------------------------------------------------------------------------------------------------------------------------------------------------------------------------------------------------------------------------------|-----|
|        | $\text{Li}_3\text{Tm}_{0.5}\text{Sm}_{0.5}\text{Cl}_6$ | $0.8333 \text{ LiNiO}_2 + 0.1667 \text{ Li}_6\text{SmTmCl}_{12} \rightarrow 0.1042 \text{ LiClO}_4 + 0.8333 \text{ NiO} + 1.729 \text{ LiCl} + 0.1667 \text{ SmClO} + 0.08333 \text{ Tm}_2\text{O}_3$                                                                                                                                                        | 98  |
|        | $\text{Li}_3\text{Er}_{0.5}\text{Y}_{0.5}\text{Cl}_6$  | $0.1667 \text{ Li}_6\text{YErCl}_{12} + 0.8333 \text{ LiNiO}_2 \rightarrow 0.1667 \text{ YClO} + 0.1042 \text{ LiClO}_4 + 0.8333 \text{ NiO} + 0.08333 \text{ Er}_2\text{O}_3 + 1.729 \text{ LiCl}$                                                                                                                                                          | 93  |
|        | $\text{Li}_3\text{Er}_{0.5}\text{Ho}_{0.5}\text{Cl}_6$ | $0.1429 \text{ Li}_6\text{HoErCl}_{12} + 0.8571 \text{ LiNiO}_2 \rightarrow 0.1071 \text{ LiClO}_4 + 0.8571 \text{ NiO} + 0.07143 \text{ Ho}_2\text{O}_3 + 1.607 \text{ LiCl} + 0.07143 \text{ Er}_2\text{O}_3$                                                                                                                                              | 102 |
|        | $\text{Li}_3\text{Er}_{0.5}\text{Dy}_{0.5}\text{Cl}_6$ | $0.1667 \text{ Li}_6\text{DyErCl}_{12} + 0.8333 \text{ LiNiO}_2 \rightarrow 0.1042 \text{ LiClO}_4 + 0.8333 \text{ NiO} + 1.729 \text{ LiCl} + 0.1667 \text{ DyClO} + 0.08333 \text{ Er}_2\text{O}_3$                                                                                                                                                        | 99  |
|        | $\text{Li}_3\text{Er}_{0.5}\text{Tb}_{0.5}\text{Cl}_6$ | $0.8571 \text{ LiNiO}_2 + 0.1429 \text{ Li}_6\text{TbErCl}_{12} \rightarrow 0.1071 \text{ LiClO}_4 + 0.07143 \text{ Tb}_2\text{O}_3 + 0.8571 \text{ NiO} + 1.607 \text{ LiCl} + 0.07143 \text{ Er}_2\text{O}_3$                                                                                                                                              | 94  |
|        | $\text{Li}_3\text{Er}_{0.5}\text{Sm}_{0.5}\text{Cl}_6$ | $0.1667 \text{ Li}_6\text{SmErCl}_{12} + 0.8333 \text{ LiNiO}_2 \rightarrow 0.1042 \text{ LiClO}_4 + 0.8333 \text{ NiO} + 1.729 \text{ LiCl} + 0.1667 \text{ SmClO} + 0.08333 \text{ Er}_2\text{O}_3$                                                                                                                                                        | 99  |
|        | $\text{Li}_3\text{Y}_{0.5}\text{Ho}_{0.5}\text{Cl}_6$  | $0.1667 \text{ Li}_6\text{YHoCl}_{12} + 0.8333 \text{ LiNiO}_2 \rightarrow 0.1667 \text{ YClO} + 0.1042 \text{ LiClO}_4 + 0.8333 \text{ NiO} + 0.08333 \text{ Ho}_2\text{O}_3 + 1.729 \text{ LiCl}$                                                                                                                                                          | 92  |
|        | $\text{Li}_3\text{Y}_{0.5}\text{Dy}_{0.5}\text{Cl}_6$  | $0.2 \text{ Li}_6\text{DyYCl}_{12} + 0.8 \text{ LiNiO}_2 \rightarrow 0.2 \text{ YClO} + 0.1 \text{ LiClO}_4 + 0.8 \text{ NiO} + 1.9 \text{ LiCl} + 0.2 \text{ DyClO}$                                                                                                                                                                                        | 88  |
|        | $\text{Li}_3\text{Y}_{0.5}\text{Tb}_{0.5}\text{Cl}_6$  | $0.1667 \text{ Li}_6\text{TbYCl}_{12} + 0.8333 \text{ LiNiO}_2 \rightarrow 0.1667 \text{ YClO} + 0.1042 \text{ LiClO}_4 + 0.8333 \text{ Tb}_2\text{O}_3 + 0.8333 \text{ NiO} + 1.729 \text{ LiCl}$                                                                                                                                                           | 84  |
|        | $\text{Li}_3\text{Y}_{0.5}\text{Sm}_{0.5}\text{Cl}_6$  | $0.2 \text{ Li}_6\text{SmYCl}_{12} + 0.8 \text{ LiNiO}_2 \rightarrow 0.2 \text{ YClO} + 0.1 \text{ LiClO}_4 + 0.8 \text{ NiO} + 1.9 \text{ LiCl} + 0.2 \text{ SmClO}$                                                                                                                                                                                        | 88  |
|        | $\text{Li}_3\text{Ho}_{0.5}\text{Dy}_{0.5}\text{Cl}_6$ | $0.1667 \text{ Li}_6\text{DyHoCl}_{12} + 0.8333 \text{ LiNiO}_2 \rightarrow 0.1042 \text{ LiClO}_4 + 0.8333 \text{ NiO} + 1.729 \text{ LiCl} + 0.1667 \text{ DyClO} + 0.08333 \text{ Ho}_2\text{O}_3$                                                                                                                                                        | 98  |
|        | $\text{Li}_3\text{Ho}_{0.5}\text{Tb}_{0.5}\text{Cl}_6$ | $0.1429 \text{ Li}_6\text{TbHoCl}_{12} + 0.8571 \text{ LiNiO}_2 \rightarrow 0.1071 \text{ LiClO}_4 + 0.07143 \text{ Tb}_2\text{O}_3 + 0.8571 \text{ NiO} + 1.607 \text{ LiCl} + 0.07143 \text{ Ho}_2\text{O}_3$                                                                                                                                              | 93  |
|        | $\text{Li}_3\text{Ho}_{0.5}\text{Sm}_{0.5}\text{Cl}_6$ | $0.1667 \text{ Li}_6\text{SmHoCl}_{12} + 0.8333 \text{ LiNiO}_2 \rightarrow 0.1042 \text{ LiClO}_4 + 0.8333 \text{ NiO} + 1.729 \text{ LiCl} + 0.1667 \text{ SmClO} + 0.08333 \text{ Ho}_2\text{O}_3$                                                                                                                                                        | 98  |
|        | $\text{Li}_3\text{Tb}_{0.5}\text{Tb}_{0.5}\text{Cl}_6$ | $0.1667 \text{ Li}_6\text{TbDyCl}_{12} + 0.8333 \text{ LiNiO}_2 \rightarrow 0.1667 \text{ DyClO} + 0.1042 \text{ LiClO}_4 + 0.8333 \text{ Tb}_2\text{O}_3 + 0.8333 \text{ NiO} + 1.729 \text{ LiCl}$                                                                                                                                                         | 89  |
|        | $\text{Li}_3\text{Tb}_{0.5}\text{Dy}_{0.5}\text{Cl}_6$ | $0.8 \text{ LiNiO}_2 + 0.2 \text{ Li}_6\text{SmDyCl}_{12} \rightarrow 0.2 \text{ DyClO} + 0.1 \text{ LiClO}_4 + 0.8 \text{ NiO} + 1.9 \text{ LiCl} + 0.2 \text{ SmClO}$                                                                                                                                                                                      | 95  |
|        | $\text{Li}_3\text{Tb}_{0.5}\text{Sm}_{0.5}\text{Cl}_6$ | $0.1667 \text{ Li}_6\text{TbSmCl}_{12} + 0.8333 \text{ LiNiO}_2 \rightarrow 0.1042 \text{ LiClO}_4 + 0.8333 \text{ NiO} + 1.729 \text{ LiCl} + 0.1667 \text{ SmClO} + 0.08333 \text{ Tb}_2\text{O}_3$                                                                                                                                                        | 90  |
| NMC111 | $\text{Li}_3\text{In}_{0.5}\text{Lu}_{0.5}\text{Cl}_6$ | $0.7513 \text{ Li}_3\text{MnCoNiO}_6 + 0.2487 \text{ Li}_6\text{LuInCl}_{12} \rightarrow 0.1119 \text{ Mn}(\text{Ni}_3\text{O}_4)_2 + 0.1503 \text{ Li}_4\text{MnCo}_5\text{O}_{12} + 0.04925 \text{ Lu}_2\text{Mn}_2\text{O}_7 + 0.1503 \text{ LuMnO}_3 + 0.08013 \text{ Li}_2\text{Mn}_3\text{NiO}_8 + 2.985 \text{ LiCl} + 0.1244 \text{ In}_2\text{O}_3$ | 76  |
|        | $\text{Li}_3\text{In}_{0.5}\text{Tm}_{0.5}\text{Cl}_6$ | $0.7513 \text{ Li}_3\text{MnCoNiO}_6 + 0.2487 \text{ Li}_6\text{TmInCl}_{12} \rightarrow 0.04925 \text{ Tm}_2\text{Mn}_2\text{O}_7 + 0.1119 \text{ Mn}(\text{Ni}_3\text{O}_4)_2 + 0.1503 \text{ Li}_4\text{MnCo}_5\text{O}_{12} + 0.08013 \text{ Li}_2\text{Mn}_3\text{NiO}_8 + 0.1503 \text{ TmMnO}_3 + 2.985 \text{ LiCl} + 0.1244 \text{ In}_2\text{O}_3$ | 72  |

|                                                        |                                                                                                                                                                                                                                                                                                                                                              |    |
|--------------------------------------------------------|--------------------------------------------------------------------------------------------------------------------------------------------------------------------------------------------------------------------------------------------------------------------------------------------------------------------------------------------------------------|----|
| $\text{Li}_3\text{In}_{0.5}\text{Er}_{0.5}\text{Cl}_6$ | $0.7365 \text{Li}_3\text{MnCoNiO}_6 + 0.2635 \text{Li}_6\text{ErInCl}_{12} \rightarrow 0.1473 \text{Li}_4\text{MnCo}_5\text{O}_{12} + 0.01964 \text{Li}_2\text{Mn}_3\text{NiO}_8 + 0.0581 \text{Er}_2\text{Mn}_2\text{O}_7 + 0.1195 \text{Mn}(\text{Ni}_3\text{O}_4)_2 + 0.1473 \text{ErMn}_2\text{O}_5 + 3.162 \text{LiCl} + 0.1318 \text{In}_2\text{O}_3$  | 73 |
| $\text{Li}_3\text{In}_{0.5}\text{Ho}_{0.5}\text{Cl}_6$ | $0.2573 \text{Li}_6\text{HoInCl}_{12} + 0.7427 \text{Li}_3\text{MnCoNiO}_6 \rightarrow 0.1485 \text{Li}_4\text{MnCo}_5\text{O}_{12} + 0.1072 \text{Mn}(\text{Ni}_3\text{O}_4)_2 + 0.04518 \text{Li}_2\text{Mn}_3\text{NiO}_8 + 0.05436 \text{Ho}_2\text{MnNiO}_6 + 0.1485 \text{HoMn}_2\text{O}_5 + 3.087 \text{LiCl} + 0.1286 \text{In}_2\text{O}_3$        | 73 |
| $\text{Li}_3\text{Bi}_{0.5}\text{Sc}_{0.5}\text{Cl}_6$ | $0.7265 \text{Li}_3\text{MnCoNiO}_6 + 0.2735 \text{Li}_6\text{ScBiCl}_{12} \rightarrow 0.1335 \text{Li}_2\text{Mn}_3\text{NiO}_8 + 0.09882 \text{Mn}(\text{Ni}_3\text{O}_4)_2 + 0.1362 \text{Li}_4\text{MnCo}_5\text{O}_{12} + 0.04541 \text{Mn}_2\text{CoO}_4 + 3.009 \text{LiCl} + 0.2735 \text{BiClO} + 0.1368 \text{Sc}_2\text{O}_3$                     | 78 |
| $\text{Li}_3\text{Bi}_{0.5}\text{Lu}_{0.5}\text{Cl}_6$ | $0.7101 \text{Li}_3\text{MnCoNiO}_6 + 0.2899 \text{Li}_6\text{LuBiCl}_{12} \rightarrow 0.05642 \text{Li}_2\text{Mn}_3\text{NiO}_8 + 0.142 \text{Li}_4\text{MnCo}_5\text{O}_{12} + 0.07393 \text{Lu}_2\text{Mn}_2\text{O}_7 + 0.1089 \text{Mn}(\text{Ni}_3\text{O}_4)_2 + 0.142 \text{LuMnO}_3 + 3.189 \text{LiCl} + 0.2899 \text{BiClO}$                     | 82 |
| $\text{Li}_3\text{Bi}_{0.5}\text{Tm}_{0.5}\text{Cl}_6$ | $0.6944 \text{Li}_3\text{MnCoNiO}_6 + 0.3056 \text{Li}_6\text{TmBiCl}_{12} \rightarrow 0.1157 \text{Mn}(\text{Ni}_3\text{O}_4)_2 + 0.1343 \text{TmMn}_2\text{O}_5 + 0.1389 \text{Li}_4\text{MnCo}_5\text{O}_{12} + 0.08333 \text{Tm}_2\text{Mn}_2\text{O}_7 + 0.00463 \text{TmMnO}_3 + 3.361 \text{LiCl} + 0.3056 \text{BiClO}$                              | 77 |
| $\text{Li}_3\text{Bi}_{0.5}\text{Er}_{0.5}\text{Cl}_6$ | $0.6944 \text{Li}_3\text{MnCoNiO}_6 + 0.3056 \text{Li}_6\text{ErBiCl}_{12} \rightarrow 0.1389 \text{ErMn}_2\text{O}_5 + 0.08333 \text{Er}_2\text{Mn}_2\text{O}_7 + 0.1389 \text{Li}_4\text{MnCo}_5\text{O}_{12} + 0.1111 \text{Mn}(\text{Ni}_3\text{O}_4)_2 + 0.02778 \text{NiO} + 3.361 \text{LiCl} + 0.3056 \text{BiClO}$                                  | 78 |
| $\text{Li}_3\text{Bi}_{0.5}\text{Y}_{0.5}\text{Cl}_6$  | $0.7143 \text{Li}_3\text{MnCoNiO}_6 + 0.2857 \text{Li}_6\text{YBiCl}_{12} \rightarrow 0.07143 \text{Li}_2\text{Mn}_3\text{NiO}_8 + 0.07143 \text{Y}_2\text{MnNiO}_6 + 0.1429 \text{YMn}_2\text{O}_5 + 0.1429 \text{Li}_4\text{MnCo}_5\text{O}_{12} + 0.5714 \text{NiO} + 3.143 \text{LiCl} + 0.2857 \text{BiClO}$                                            | 69 |
| $\text{Li}_3\text{Bi}_{0.5}\text{Ho}_{0.5}\text{Cl}_6$ | $0.7042 \text{Li}_3\text{MnCoNiO}_6 + 0.2958 \text{Li}_6\text{HoBiCl}_{12} \rightarrow 0.07746 \text{Ho}_2\text{MnNiO}_6 + 0.03521 \text{Li}_2\text{Mn}_3\text{NiO}_8 + 0.1408 \text{Li}_4\text{MnCo}_5\text{O}_{12} + 0.1408 \text{HoMn}_2\text{O}_5 + 0.09859 \text{Mn}(\text{Ni}_3\text{O}_4)_2 + 3.254 \text{LiCl} + 0.2958 \text{BiClO}$                | 78 |
| $\text{Li}_3\text{Bi}_{0.5}\text{Dy}_{0.5}\text{Cl}_6$ | $0.2958 \text{Li}_6\text{DyBiCl}_{12} + 0.7042 \text{Li}_3\text{MnCoNiO}_6 \rightarrow 0.03521 \text{Li}_2\text{Mn}_3\text{NiO}_8 + 0.1408 \text{Li}_4\text{MnCo}_5\text{O}_{12} + 0.1408 \text{DyMn}_2\text{O}_5 + 0.07746 \text{Dy}_2\text{MnNiO}_6 + 0.09859 \text{Mn}(\text{Ni}_3\text{O}_4)_2 + 3.254 \text{LiCl} + 0.2958 \text{BiClO}$                | 74 |
| $\text{Li}_3\text{Bi}_{0.5}\text{Tb}_{0.5}\text{Cl}_6$ | $0.7042 \text{Li}_3\text{MnCoNiO}_6 + 0.2958 \text{Li}_6\text{TbBiCl}_{12} \rightarrow 0.09859 \text{Mn}(\text{Ni}_3\text{O}_4)_2 + 0.03521 \text{Li}_2\text{Mn}_3\text{NiO}_8 + 0.1408 \text{Li}_4\text{MnCo}_5\text{O}_{12} + 0.1408 \text{TbMn}_2\text{O}_5 + 0.07746 \text{Tb}_2\text{MnNiO}_6 + 3.254 \text{LiCl} + 0.2958 \text{BiClO}$                | 73 |
| $\text{Li}_3\text{Bi}_{0.5}\text{Sm}_{0.5}\text{Cl}_6$ | $0.6855 \text{Li}_3\text{MnCoNiO}_6 + 0.3145 \text{Li}_6\text{SmBiCl}_{12} \rightarrow 0.05645 \text{Li}_2\text{Mn}_3\text{NiO}_8 + 0.1371 \text{Li}_4\text{MnCo}_5\text{O}_{12} + 0.1048 \text{Mn}(\text{Ni}_3\text{O}_4)_2 + 0.1371 \text{SmMn}_2\text{O}_5 + 0.1774 \text{SmClO} + 0.3145 \text{BiClO} + 3.282 \text{LiCl}$                               | 74 |
| $\text{Li}_3\text{Sc}_{0.5}\text{Lu}_{0.5}\text{Cl}_6$ | $0.7377 \text{Li}_3\text{MnCoNiO}_6 + 0.2623 \text{Li}_6\text{LuScCl}_{12} \rightarrow 0.04611 \text{Mn}_2\text{CoO}_4 + 0.1158 \text{Mn}(\text{Ni}_3\text{O}_4)_2 + 0.1383 \text{Li}_4\text{MnCo}_5\text{O}_{12} + 0.04303 \text{Li}_2\text{Mn}_3\text{NiO}_8 + 0.1311 \text{Lu}_2\text{Mn}_2\text{O}_7 + 0.1311 \text{Sc}_2\text{O}_3 + 3.148 \text{LiCl}$ | 92 |
| $\text{Li}_3\text{Sc}_{0.5}\text{Tm}_{0.5}\text{Cl}_6$ | $0.7365 \text{Li}_3\text{MnCoNiO}_6 + 0.2635 \text{Li}_6\text{TmScCl}_{12} \rightarrow 0.1473 \text{Li}_4\text{MnCo}_5\text{O}_{12} + 0.0581 \text{Tm}_2\text{Mn}_2\text{O}_7 + 0.1473 \text{TmMn}_2\text{O}_5 + 0.01964 \text{Li}_2\text{Mn}_3\text{NiO}_8 + 0.1195 \text{Mn}(\text{Ni}_3\text{O}_4)_2 + 0.1318 \text{Sc}_2\text{O}_3 + 3.162 \text{LiCl}$  | 88 |
| $\text{Li}_3\text{Sc}_{0.5}\text{Er}_{0.5}\text{Cl}_6$ | $0.2635 \text{Li}_6\text{ErScCl}_{12} + 0.7365 \text{Li}_3\text{MnCoNiO}_6 \rightarrow 0.01964 \text{Li}_2\text{Mn}_3\text{NiO}_8 + 0.1473 \text{Li}_4\text{MnCo}_5\text{O}_{12} + 0.0581 \text{Er}_2\text{Mn}_2\text{O}_7 + 0.1473 \text{ErMn}_2\text{O}_5 + 0.1195 \text{Mn}(\text{Ni}_3\text{O}_4)_2 + 0.1318 \text{Sc}_2\text{O}_3 + 3.162 \text{LiCl}$  | 89 |

|                                                        |                                                                                                                                                                                                                                                                                                                                                             |    |
|--------------------------------------------------------|-------------------------------------------------------------------------------------------------------------------------------------------------------------------------------------------------------------------------------------------------------------------------------------------------------------------------------------------------------------|----|
| $\text{Li}_3\text{Sc}_{0.5}\text{Y}_{0.5}\text{Cl}_6$  | $0.7315 \text{Li}_3\text{MnCoNiO}_6 + 0.2685 \text{Li}_6\text{YScCl}_{12} \rightarrow 0.1463 \text{Li}_4\text{MnCo}_5\text{O}_{12} + 0.1119 \text{Mn}(\text{Ni}_3\text{O}_4)_2 + 0.1463 \text{YMn}_2\text{O}_5 + 0.06024 \text{Li}_2\text{Mn}_3\text{NiO}_8 + 0.1343 \text{Sc}_2\text{O}_3 + 0.1222 \text{YClO} + 3.1 \text{LiCl}$                          | 81 |
| $\text{Li}_3\text{Sc}_{0.5}\text{Ho}_{0.5}\text{Cl}_6$ | $0.7365 \text{Li}_3\text{MnCoNiO}_6 + 0.2635 \text{Li}_6\text{HoScCl}_{12} \rightarrow 0.01964 \text{Li}_2\text{Mn}_3\text{NiO}_8 + 0.1195 \text{Mn}(\text{Ni}_3\text{O}_4)_2 + 0.0581 \text{Ho}_2\text{Mn}_2\text{O}_7 + 0.1473 \text{HoMn}_2\text{O}_5 + 0.1473 \text{Li}_4\text{MnCo}_5\text{O}_{12} + 0.1318 \text{Sc}_2\text{O}_3 + 3.162 \text{LiCl}$ | 89 |
| $\text{Li}_3\text{Sc}_{0.5}\text{Dy}_{0.5}\text{Cl}_6$ | $0.7315 \text{Li}_3\text{MnCoNiO}_6 + 0.2685 \text{Li}_6\text{DyScCl}_{12} \rightarrow 0.06024 \text{Li}_2\text{Mn}_3\text{NiO}_8 + 0.1119 \text{Mn}(\text{Ni}_3\text{O}_4)_2 + 0.1463 \text{DyMn}_2\text{O}_5 + 0.1463 \text{Li}_4\text{MnCo}_5\text{O}_{12} + 0.1343 \text{Sc}_2\text{O}_3 + 0.1222 \text{DyClO} + 3.1 \text{LiCl}$                       | 86 |
| $\text{Li}_3\text{Sc}_{0.5}\text{Tb}_{0.5}\text{Cl}_6$ | $0.7427 \text{Li}_3\text{MnCoNiO}_6 + 0.2573 \text{Li}_6\text{TbScCl}_{12} \rightarrow 0.04518 \text{Li}_2\text{Mn}_3\text{NiO}_8 + 0.1072 \text{Mn}(\text{Ni}_3\text{O}_4)_2 + 0.1485 \text{TbMn}_2\text{O}_5 + 0.05436 \text{Tb}_2\text{MnNiO}_6 + 0.1485 \text{Li}_4\text{MnCo}_5\text{O}_{12} + 0.1286 \text{Sc}_2\text{O}_3 + 3.087 \text{LiCl}$       | 84 |
| $\text{Li}_3\text{Sc}_{0.5}\text{Sm}_{0.5}\text{Cl}_6$ | $0.7315 \text{Li}_3\text{MnCoNiO}_6 + 0.2685 \text{Li}_6\text{SmScCl}_{12} \rightarrow 0.1119 \text{Mn}(\text{Ni}_3\text{O}_4)_2 + 0.1463 \text{Li}_4\text{MnCo}_5\text{O}_{12} + 0.06024 \text{Li}_2\text{Mn}_3\text{NiO}_8 + 0.1463 \text{SmMn}_2\text{O}_5 + 0.1222 \text{SmClO} + 3.1 \text{LiCl} + 0.1343 \text{Sc}_2\text{O}_3$                       | 86 |
| $\text{Li}_3\text{Lu}_{0.5}\text{Tm}_{0.5}\text{Cl}_6$ | $0.7186 \text{Li}_3\text{MnCoNiO}_6 + 0.2814 \text{Li}_6\text{TmLuCl}_{12} \rightarrow 0.1198 \text{Mn}(\text{Ni}_3\text{O}_4)_2 + 0.1437 \text{Li}_4\text{MnCo}_5\text{O}_{12} + 0.1437 \text{LuMnO}_3 + 0.06886 \text{Lu}_2\text{Mn}_2\text{O}_7 + 0.1078 \text{TmClO} + 0.08683 \text{Tm}_2\text{Mn}_2\text{O}_7 + 3.269 \text{LiCl}$                    | 91 |
| $\text{Li}_3\text{Lu}_{0.5}\text{Er}_{0.5}\text{Cl}_6$ | $0.7317 \text{Li}_3\text{MnCoNiO}_6 + 0.2683 \text{Li}_6\text{ErLuCl}_{12} \rightarrow 0.08537 \text{Lu}_2\text{Mn}_2\text{O}_7 + 0.1463 \text{Li}_4\text{MnCo}_5\text{O}_{12} + 0.04878 \text{ErMn}_2\text{O}_5 + 0.1098 \text{Er}_2\text{Mn}_2\text{O}_7 + 0.7317 \text{NiO} + 0.09756 \text{LuMnO}_3 + 3.22 \text{LiCl}$                                 | 92 |
| $\text{Li}_3\text{Lu}_{0.5}\text{Y}_{0.5}\text{Cl}_6$  | $0.7143 \text{Li}_3\text{MnCoNiO}_6 + 0.2857 \text{Li}_6\text{YLuCl}_{12} \rightarrow 0.1429 \text{Lu}_2\text{Mn}_2\text{O}_7 + 0.1429 \text{YMn}_2\text{O}_5 + 0.1429 \text{Li}_4\text{MnCo}_5\text{O}_{12} + 0.1429 \text{YClO} + 0.7143 \text{NiO} + 3.286 \text{LiCl}$                                                                                  | 84 |
| $\text{Li}_3\text{Lu}_{0.5}\text{Ho}_{0.5}\text{Cl}_6$ | $0.2683 \text{Li}_6\text{HoLuCl}_{12} + 0.7317 \text{Li}_3\text{MnCoNiO}_6 \rightarrow 0.122 \text{HoMn}_2\text{O}_5 + 0.122 \text{Lu}_2\text{Mn}_2\text{O}_7 + 0.07317 \text{Ho}_2\text{MnNiO}_6 + 0.1463 \text{Li}_4\text{MnCo}_5\text{O}_{12} + 0.02439 \text{LuMnO}_3 + 0.6585 \text{NiO} + 3.22 \text{LiCl}$                                           | 92 |
| $\text{Li}_3\text{Lu}_{0.5}\text{Dy}_{0.5}\text{Cl}_6$ | $0.7143 \text{Li}_3\text{MnCoNiO}_6 + 0.2857 \text{Li}_6\text{DyLuCl}_{12} \rightarrow 0.1429 \text{DyMn}_2\text{O}_5 + 0.7143 \text{NiO} + 0.1429 \text{Li}_4\text{MnCo}_5\text{O}_{12} + 0.1429 \text{Lu}_2\text{Mn}_2\text{O}_7 + 0.1429 \text{DyClO} + 3.286 \text{LiCl}$                                                                               | 89 |
| $\text{Li}_3\text{Lu}_{0.5}\text{Tb}_{0.5}\text{Cl}_6$ | $0.7317 \text{Li}_3\text{MnCoNiO}_6 + 0.2683 \text{Li}_6\text{TbLuCl}_{12} \rightarrow 0.06098 \text{Tb}_2\text{MnNiO}_6 + 0.1463 \text{Li}_4\text{MnCo}_5\text{O}_{12} + 0.1463 \text{TbMn}_2\text{O}_5 + 0.1159 \text{Lu}_2\text{Mn}_2\text{O}_7 + 0.6707 \text{NiO} + 3.22 \text{LiCl} + 0.01829 \text{Lu}_2\text{O}_3$                                  | 87 |
| $\text{Li}_3\text{Lu}_{0.5}\text{Sm}_{0.5}\text{Cl}_6$ | $0.7143 \text{Li}_3\text{MnCoNiO}_6 + 0.2857 \text{Li}_6\text{SmLuCl}_{12} \rightarrow 0.1429 \text{Lu}_2\text{Mn}_2\text{O}_7 + 0.1429 \text{Li}_4\text{MnCo}_5\text{O}_{12} + 0.1429 \text{SmMn}_2\text{O}_5 + 0.1429 \text{SmClO} + 0.7143 \text{NiO} + 3.286 \text{LiCl}$                                                                               | 89 |
| $\text{Li}_3\text{Tm}_{0.5}\text{Er}_{0.5}\text{Cl}_6$ | $0.2857 \text{Li}_6\text{ErTmCl}_{12} + 0.7143 \text{Li}_3\text{MnCoNiO}_6 \rightarrow 0.1429 \text{ErMn}_2\text{O}_5 + 0.07143 \text{Tm}_2\text{Mn}_2\text{O}_7 + 0.1429 \text{Li}_4\text{MnCo}_5\text{O}_{12} + 0.07143 \text{Er}_2\text{Mn}_2\text{O}_7 + 0.7143 \text{NiO} + 0.1429 \text{TmClO} + 3.286 \text{LiCl}$                                   | 87 |
| $\text{Li}_3\text{Tm}_{0.5}\text{Y}_{0.5}\text{Cl}_6$  | $0.2857 \text{Li}_6\text{YTmCl}_{12} + 0.7143 \text{Li}_3\text{MnCoNiO}_6 \rightarrow 0.1429 \text{Tm}_2\text{Mn}_2\text{O}_7 + 0.1429 \text{Li}_4\text{MnCo}_5\text{O}_{12} + 0.7143 \text{NiO} + 0.1429 \text{YMn}_2\text{O}_5 + 0.1429 \text{YClO} + 3.286 \text{LiCl}$                                                                                  | 79 |
| $\text{Li}_3\text{Tm}_{0.5}\text{Ho}_{0.5}\text{Cl}_6$ | $0.7258 \text{Li}_3\text{MnCoNiO}_6 + 0.2742 \text{Li}_6\text{HoTmCl}_{12} \rightarrow 0.1452 \text{HoMn}_2\text{O}_5 + 0.1129 \text{Tm}_2\text{Mn}_2\text{O}_7 + 0.06452 \text{Ho}_2\text{MnNiO}_6 + 0.1452 \text{Li}_4\text{MnCo}_5\text{O}_{12} + 0.6613 \text{NiO} + 0.04839 \text{TmClO} +$                                                            | 87 |

## 3.242 LiCl

|                                                        |                                                                                                                                                                                                                                                                                                                                                          |    |
|--------------------------------------------------------|----------------------------------------------------------------------------------------------------------------------------------------------------------------------------------------------------------------------------------------------------------------------------------------------------------------------------------------------------------|----|
| $\text{Li}_3\text{Tm}_{0.5}\text{Dy}_{0.5}\text{Cl}_6$ | $0.7143 \text{Li}_3\text{MnCoNiO}_6 + 0.2857 \text{Li}_6\text{DyTmCl}_{12} \rightarrow 0.1429 \text{Tm}_2\text{Mn}_2\text{O}_7 + 0.1429 \text{Li}_4\text{MnCo}_5\text{O}_{12} + 0.7143 \text{NiO} + 0.1429 \text{DyMn}_2\text{O}_5 + 0.1429 \text{DyClO} + 3.286 \text{LiCl}$                                                                            | 84 |
| $\text{Li}_3\text{Tm}_{0.5}\text{Tb}_{0.5}\text{Cl}_6$ | $0.7317 \text{Li}_3\text{MnCoNiO}_6 + 0.2683 \text{Li}_6\text{TbTmCl}_{12} \rightarrow 0.122 \text{Tm}_2\text{Mn}_2\text{O}_7 + 0.02439 \text{TmMnO}_3 + 0.07317 \text{Tb}_2\text{MnNiO}_6 + 0.1463 \text{Li}_4\text{MnCo}_5\text{O}_{12} + 0.122 \text{TbMn}_2\text{O}_5 + 0.6585 \text{NiO} + 3.22 \text{LiCl}$                                        | 82 |
| $\text{Li}_3\text{Tm}_{0.5}\text{Sm}_{0.5}\text{Cl}_6$ | $0.7143 \text{Li}_3\text{MnCoNiO}_6 + 0.2857 \text{Li}_6\text{SmTmCl}_{12} \rightarrow 0.1429 \text{Li}_4\text{MnCo}_5\text{O}_{12} + 0.1429 \text{SmMn}_2\text{O}_5 + 0.1429 \text{Tm}_2\text{Mn}_2\text{O}_7 + 0.7143 \text{NiO} + 0.1429 \text{SmClO} + 3.286 \text{LiCl}$                                                                            | 84 |
| $\text{Li}_3\text{Er}_{0.5}\text{Y}_{0.5}\text{Cl}_6$  | $0.7143 \text{Li}_3\text{MnCoNiO}_6 + 0.2857 \text{Li}_6\text{YErCl}_{12} \rightarrow 0.1429 \text{Ym}_2\text{O}_5 + 0.1429 \text{Li}_4\text{MnCo}_5\text{O}_{12} + 0.1429 \text{Er}_2\text{Mn}_2\text{O}_7 + 0.1429 \text{YClO} + 0.7143 \text{NiO} + 3.286 \text{LiCl}$                                                                                | 80 |
| $\text{Li}_3\text{Er}_{0.5}\text{Ho}_{0.5}\text{Cl}_6$ | $0.7317 \text{Li}_3\text{MnCoNiO}_6 + 0.2683 \text{Li}_6\text{HoErCl}_{12} \rightarrow 0.07317 \text{ErMn}_2\text{O}_5 + 0.09756 \text{Er}_2\text{Mn}_2\text{O}_7 + 0.07317 \text{HoMn}_2\text{O}_5 + 0.1463 \text{Li}_4\text{MnCo}_5\text{O}_{12} + 0.09756 \text{Ho}_2\text{MnNiO}_6 + 0.6341 \text{NiO} + 3.22 \text{LiCl}$                           | 88 |
| $\text{Li}_3\text{Er}_{0.5}\text{Dy}_{0.5}\text{Cl}_6$ | $0.7143 \text{Li}_3\text{MnCoNiO}_6 + 0.2857 \text{Li}_6\text{DyErCl}_{12} \rightarrow 0.1429 \text{Er}_2\text{Mn}_2\text{O}_7 + 0.1429 \text{DyMn}_2\text{O}_5 + 0.7143 \text{NiO} + 0.1429 \text{Li}_4\text{MnCo}_5\text{O}_{12} + 0.1429 \text{DyClO} + 3.286 \text{LiCl}$                                                                            | 85 |
| $\text{Li}_3\text{Er}_{0.5}\text{Tb}_{0.5}\text{Cl}_6$ | $0.7317 \text{Li}_3\text{MnCoNiO}_6 + 0.2683 \text{Li}_6\text{TbErCl}_{12} \rightarrow 0.1463 \text{Li}_4\text{MnCo}_5\text{O}_{12} + 0.122 \text{TbMn}_2\text{O}_5 + 0.07317 \text{Tb}_2\text{MnNiO}_6 + 0.122 \text{Er}_2\text{Mn}_2\text{O}_7 + 0.6585 \text{NiO} + 0.02439 \text{ErMnO}_3 + 3.22 \text{LiCl}$                                        | 83 |
| $\text{Li}_3\text{Er}_{0.5}\text{Sm}_{0.5}\text{Cl}_6$ | $0.2857 \text{Li}_6\text{SmErCl}_{12} + 0.7143 \text{Li}_3\text{MnCoNiO}_6 \rightarrow 0.1429 \text{Li}_4\text{MnCo}_5\text{O}_{12} + 0.1429 \text{Er}_2\text{Mn}_2\text{O}_7 + 0.1429 \text{SmMn}_2\text{O}_5 + 0.7143 \text{NiO} + 0.1429 \text{SmClO} + 3.286 \text{LiCl}$                                                                            | 85 |
| $\text{Li}_3\text{Y}_{0.5}\text{Ho}_{0.5}\text{Cl}_6$  | $0.7194 \text{Li}_3\text{MnCoNiO}_6 + 0.2806 \text{Li}_6\text{YHoCl}_{12} \rightarrow 0.01799 \text{Li}_2\text{Mn}_3\text{NiO}_8 + 0.1439 \text{Ym}_2\text{O}_5 + 0.09353 \text{Mn}(\text{Ni}_3\text{O}_4)_2 + 0.1439 \text{Li}_4\text{MnCo}_5\text{O}_{12} + 0.1403 \text{Ho}_2\text{MnNiO}_6 + 0.1367 \text{YClO} + 3.23 \text{LiCl}$                  | 80 |
| $\text{Li}_3\text{Y}_{0.5}\text{Dy}_{0.5}\text{Cl}_6$  | $0.7194 \text{Li}_3\text{MnCoNiO}_6 + 0.2806 \text{Li}_6\text{DyYCl}_{12} \rightarrow 0.1439 \text{Ym}_2\text{O}_5 + 0.01799 \text{Li}_2\text{Mn}_3\text{NiO}_8 + 0.1403 \text{Dy}_2\text{MnNiO}_6 + 0.09353 \text{Mn}(\text{Ni}_3\text{O}_4)_2 + 0.1439 \text{Li}_4\text{MnCo}_5\text{O}_{12} + 0.1367 \text{YClO} + 3.23 \text{LiCl}$                  | 76 |
| $\text{Li}_3\text{Y}_{0.5}\text{Tb}_{0.5}\text{Cl}_6$  | $0.7325 \text{Li}_3\text{MnCoNiO}_6 + 0.2675 \text{Li}_6\text{TbYCl}_{12} \rightarrow 0.1465 \text{Li}_4\text{MnCo}_5\text{O}_{12} + 0.003185 \text{Li}_2\text{Mn}_3\text{NiO}_8 + 0.1338 \text{Y}_2\text{MnNiO}_6 + 0.08917 \text{Mn}(\text{Ni}_3\text{O}_4)_2 + 0.06051 \text{Tb}_2\text{MnNiO}_6 + 0.1465 \text{TbMn}_2\text{O}_5 + 3.21 \text{LiCl}$ | 74 |
| $\text{Li}_3\text{Y}_{0.5}\text{Sm}_{0.5}\text{Cl}_6$  | $0.2806 \text{Li}_6\text{SmYCl}_{12} + 0.7194 \text{Li}_3\text{MnCoNiO}_6 \rightarrow 0.1403 \text{Y}_2\text{MnNiO}_6 + 0.1439 \text{Li}_4\text{MnCo}_5\text{O}_{12} + 0.09353 \text{Mn}(\text{Ni}_3\text{O}_4)_2 + 0.01799 \text{Li}_2\text{Mn}_3\text{NiO}_8 + 0.1439 \text{SmMn}_2\text{O}_5 + 0.1367 \text{SmClO} + 3.23 \text{LiCl}$                | 76 |
| $\text{Li}_3\text{Ho}_{0.5}\text{Dy}_{0.5}\text{Cl}_6$ | $0.7143 \text{Li}_3\text{MnCoNiO}_6 + 0.2857 \text{Li}_6\text{DyHoCl}_{12} \rightarrow 0.102 \text{Mn}(\text{Ni}_3\text{O}_4)_2 + 0.1429 \text{Li}_4\text{MnCo}_5\text{O}_{12} + 0.102 \text{Ho}_2\text{MnNiO}_6 + 0.04082 \text{Ho}_2\text{Mn}_2\text{O}_7 + 0.1429 \text{DyMn}_2\text{O}_5 + 0.1429 \text{DyClO} + 3.286 \text{LiCl}$                  | 84 |
| $\text{Li}_3\text{Ho}_{0.5}\text{Tb}_{0.5}\text{Cl}_6$ | $0.7317 \text{Li}_3\text{MnCoNiO}_6 + 0.2683 \text{Li}_6\text{TbHoCl}_{12} \rightarrow 0.1272 \text{Ho}_2\text{MnNiO}_6 + 0.006969 \text{Ho}_2\text{Mn}_2\text{O}_7 + 0.09059 \text{Mn}(\text{Ni}_3\text{O}_4)_2 + 0.1463 \text{Li}_4\text{MnCo}_5\text{O}_{12} + 0.06098 \text{Tb}_2\text{MnNiO}_6 + 0.1463 \text{TbMn}_2\text{O}_5 + 3.22 \text{LiCl}$ | 83 |
| $\text{Li}_3\text{Ho}_{0.5}\text{Sm}_{0.5}\text{Cl}_6$ | $0.6944 \text{Li}_3\text{MnCoNiO}_6 + 0.3056 \text{Li}_6\text{SmHoCl}_{12} \rightarrow 0.1389 \text{Li}_4\text{MnCo}_5\text{O}_{12} + 0.07937 \text{Ho}_2\text{Mn}_2\text{O}_7 + 0.003968 \text{Ho}_2\text{MnNiO}_6 + 0.1389 \text{HoMn}_2\text{O}_5 + 0.1151 \text{Mn}(\text{Ni}_3\text{O}_4)_2 +$                                                      | 85 |



|        |                                                        |                                                                                                                                                                                                                                                                                                                                                                                             |    |
|--------|--------------------------------------------------------|---------------------------------------------------------------------------------------------------------------------------------------------------------------------------------------------------------------------------------------------------------------------------------------------------------------------------------------------------------------------------------------------|----|
|        |                                                        | 0.3056 SmClO + 3.361 LiCl                                                                                                                                                                                                                                                                                                                                                                   |    |
|        | $\text{Li}_3\text{Tb}_{0.5}\text{Tb}_{0.5}\text{Cl}_6$ | $0.2675 \text{Li}_6\text{TbDyCl}_{12} + 0.7325 \text{Li}_3\text{MnCoNiO}_6 \rightarrow 0.08917 \text{Mn}(\text{Ni}_3\text{O}_4)_2 + 0.1465 \text{TbMn}_2\text{O}_5 + 0.1338 \text{Dy}_2\text{MnNiO}_6 + 0.06051 \text{Tb}_2\text{MnNiO}_6 + 0.1465 \text{Li}_4\text{MnCo}_5\text{O}_{12} + 0.003185 \text{Li}_2\text{Mn}_3\text{NiO}_8 + 3.21 \text{LiCl}$                                  | 79 |
|        | $\text{Li}_3\text{Tb}_{0.5}\text{Dy}_{0.5}\text{Cl}_6$ | $0.7194 \text{Li}_3\text{MnCoNiO}_6 + 0.2806 \text{Li}_6\text{SmDyCl}_{12} \rightarrow 0.01799 \text{Li}_2\text{Mn}_3\text{NiO}_8 + 0.1439 \text{SmMn}_2\text{O}_5 + 0.1439 \text{Li}_4\text{MnCo}_5\text{O}_{12} + 0.09353 \text{Mn}(\text{Ni}_3\text{O}_4)_2 + 0.1403 \text{Dy}_2\text{MnNiO}_6 + 0.1367 \text{SmClO} + 3.23 \text{LiCl}$                                                 | 81 |
|        | $\text{Li}_3\text{Tb}_{0.5}\text{Sm}_{0.5}\text{Cl}_6$ | $0.7042 \text{Li}_3\text{MnCoNiO}_6 + 0.2958 \text{Li}_6\text{TbSmCl}_{12} \rightarrow 0.03521 \text{Li}_2\text{Mn}_3\text{NiO}_8 + 0.09859 \text{Mn}(\text{Ni}_3\text{O}_4)_2 + 0.1408 \text{Li}_4\text{MnCo}_5\text{O}_{12} + 0.1408 \text{TbMn}_2\text{O}_5 + 0.07746 \text{Tb}_2\text{MnNiO}_6 + 0.2958 \text{SmClO} + 3.254 \text{LiCl}$                                               | 79 |
|        | $\text{Li}_3\text{In}_{0.5}\text{Lu}_{0.5}\text{Cl}_6$ | $0.2309 \text{Li}_{10}\text{Mn}_3\text{Co}_2(\text{NiO}_4)_5 + 0.7691 \text{Li}_3\text{Lu}_{0.5}\text{In}_{0.5}\text{Cl}_6 \rightarrow 0.191 \text{Mn}(\text{Ni}_3\text{O}_4)_2 + 0.09235 \text{Li}_4\text{MnCo}_5\text{O}_{12} + 0.04617 \text{LiClO}_4 + 0.1923 \text{Lu}_2\text{Mn}_2\text{O}_7 + 0.008223 \text{Li}_2\text{Mn}_3\text{NiO}_8 + 4.184 \text{LiCl} + 0.3846 \text{InClO}$ | 57 |
|        | $\text{Li}_3\text{In}_{0.5}\text{Tm}_{0.5}\text{Cl}_6$ | $0.2309 \text{Li}_{10}\text{Mn}_3\text{Co}_2(\text{NiO}_4)_5 + 0.7691 \text{Li}_3\text{Tm}_{0.5}\text{In}_{0.5}\text{Cl}_6 \rightarrow 0.1923 \text{Tm}_2\text{Mn}_2\text{O}_7 + 0.191 \text{Mn}(\text{Ni}_3\text{O}_4)_2 + 0.09235 \text{Li}_4\text{MnCo}_5\text{O}_{12} + 0.008223 \text{Li}_2\text{Mn}_3\text{NiO}_8 + 0.04617 \text{LiClO}_4 + 4.184 \text{LiCl} + 0.3846 \text{InClO}$ | 51 |
|        | $\text{Li}_3\text{In}_{0.5}\text{Er}_{0.5}\text{Cl}_6$ | $0.2309 \text{Li}_{10}\text{Mn}_3\text{Co}_2(\text{NiO}_4)_5 + 0.7691 \text{Li}_3\text{Er}_{0.5}\text{In}_{0.5}\text{Cl}_6 \rightarrow 0.09235 \text{Li}_4\text{MnCo}_5\text{O}_{12} + 0.008223 \text{Li}_2\text{Mn}_3\text{NiO}_8 + 0.1923 \text{Er}_2\text{Mn}_2\text{O}_7 + 0.191 \text{Mn}(\text{Ni}_3\text{O}_4)_2 + 0.04617 \text{LiClO}_4 + 4.184 \text{LiCl} + 0.3846 \text{InClO}$ | 52 |
|        | $\text{Li}_3\text{In}_{0.5}\text{Ho}_{0.5}\text{Cl}_6$ | $0.7691 \text{Li}_3\text{Ho}_{0.5}\text{In}_{0.5}\text{Cl}_6 + 0.2309 \text{Li}_{10}\text{Mn}_3\text{Co}_2(\text{NiO}_4)_5 \rightarrow 0.09235 \text{Li}_4\text{MnCo}_5\text{O}_{12} + 0.191 \text{Mn}(\text{Ni}_3\text{O}_4)_2 + 0.008223 \text{Li}_2\text{Mn}_3\text{NiO}_8 + 0.1923 \text{Ho}_2\text{Mn}_2\text{O}_7 + 0.04617 \text{LiClO}_4 + 4.184 \text{LiCl} + 0.3846 \text{InClO}$ | 51 |
|        | $\text{Li}_3\text{Bi}_{0.5}\text{Sc}_{0.5}\text{Cl}_6$ | $0.259 \text{Li}_{10}\text{Mn}_3\text{Co}_2(\text{NiO}_4)_5 + 0.741 \text{Li}_3\text{Sc}_{0.5}\text{Bi}_{0.5}\text{Cl}_6 \rightarrow 0.1615 \text{Li}_2\text{Mn}_3\text{NiO}_8 + 0.0518 \text{LiClO}_4 + 0.1889 \text{Mn}(\text{Ni}_3\text{O}_4)_2 + 0.1036 \text{Li}_4\text{MnCo}_5\text{O}_{12} + 4.024 \text{LiCl} + 0.3705 \text{BiClO} + 0.1853 \text{Sc}_2\text{O}_3$                 | 59 |
| NMC532 | $\text{Li}_3\text{Bi}_{0.5}\text{Lu}_{0.5}\text{Cl}_6$ | $0.2309 \text{Li}_{10}\text{Mn}_3\text{Co}_2(\text{NiO}_4)_5 + 0.7691 \text{Li}_3\text{Lu}_{0.5}\text{Bi}_{0.5}\text{Cl}_6 \rightarrow 0.008223 \text{Li}_2\text{Mn}_3\text{NiO}_8 + 0.09235 \text{Li}_4\text{MnCo}_5\text{O}_{12} + 0.1923 \text{Lu}_2\text{Mn}_2\text{O}_7 + 0.191 \text{Mn}(\text{Ni}_3\text{O}_4)_2 + 0.04617 \text{LiClO}_4 + 4.184 \text{LiCl} + 0.3846 \text{BiClO}$ | 64 |
|        | $\text{Li}_3\text{Bi}_{0.5}\text{Tm}_{0.5}\text{Cl}_6$ | $0.2309 \text{Li}_{10}\text{Mn}_3\text{Co}_2(\text{NiO}_4)_5 + 0.7691 \text{Li}_3\text{Tm}_{0.5}\text{Bi}_{0.5}\text{Cl}_6 \rightarrow 0.191 \text{Mn}(\text{Ni}_3\text{O}_4)_2 + 0.008223 \text{Li}_2\text{Mn}_3\text{NiO}_8 + 0.09235 \text{Li}_4\text{MnCo}_5\text{O}_{12} + 0.1923 \text{Tm}_2\text{Mn}_2\text{O}_7 + 0.04617 \text{LiClO}_4 + 4.184 \text{LiCl} + 0.3846 \text{BiClO}$ | 58 |
|        | $\text{Li}_3\text{Bi}_{0.5}\text{Er}_{0.5}\text{Cl}_6$ | $0.2309 \text{Li}_{10}\text{Mn}_3\text{Co}_2(\text{NiO}_4)_5 + 0.7691 \text{Li}_3\text{Er}_{0.5}\text{Bi}_{0.5}\text{Cl}_6 \rightarrow 0.1923 \text{Er}_2\text{Mn}_2\text{O}_7 + 0.09235 \text{Li}_4\text{MnCo}_5\text{O}_{12} + 0.008223 \text{Li}_2\text{Mn}_3\text{NiO}_8 + 0.04617 \text{LiClO}_4 + 0.191 \text{Mn}(\text{Ni}_3\text{O}_4)_2 + 4.184 \text{LiCl} + 0.3846 \text{BiClO}$ | 59 |
|        | $\text{Li}_3\text{Bi}_{0.5}\text{Y}_{0.5}\text{Cl}_6$  | $0.2185 \text{Li}_{10}\text{Mn}_3\text{Co}_2(\text{NiO}_4)_5 + 0.7815 \text{Li}_3\text{Y}_{0.5}\text{Bi}_{0.5}\text{Cl}_6 \rightarrow 0.1594 \text{Mn}(\text{Ni}_3\text{O}_4)_2 + 0.1362 \text{Li}_2\text{Mn}_3\text{NiO}_8 + 0.0437 \text{LiClO}_4 + 0.0874 \text{Li}_4\text{MnCo}_5\text{O}_{12} + 0.3907 \text{YClO} + 3.864 \text{LiCl} + 0.3907 \text{BiClO}$                          | 49 |
|        | $\text{Li}_3\text{Bi}_{0.5}\text{Ho}_{0.5}\text{Cl}_6$ | $0.2309 \text{Li}_{10}\text{Mn}_3\text{Co}_2(\text{NiO}_4)_5 + 0.7691 \text{Li}_3\text{Ho}_{0.5}\text{Bi}_{0.5}\text{Cl}_6 \rightarrow 0.1923 \text{Ho}_2\text{Mn}_2\text{O}_7 + 0.04617 \text{LiClO}_4 + 0.008223 \text{Li}_2\text{Mn}_3\text{NiO}_8 + 0.09235 \text{Li}_4\text{MnCo}_5\text{O}_{12} + 0.191 \text{Mn}(\text{Ni}_3\text{O}_4)_2 + 4.184 \text{LiCl} + 0.3846 \text{BiClO}$ | 58 |
|        | $\text{Li}_3\text{Bi}_{0.5}\text{Dy}_{0.5}\text{Cl}_6$ | $0.7815 \text{Li}_3\text{Tb}_{0.5}\text{Bi}_{0.5}\text{Cl}_6 + 0.2185 \text{Li}_{10}\text{Mn}_3\text{Co}_2(\text{NiO}_4)_5 \rightarrow 0.1362 \text{Li}_2\text{Mn}_3\text{NiO}_8 + 0.0874 \text{Li}_4\text{MnCo}_5\text{O}_{12} + 0.1594$                                                                                                                                                   | 54 |

|                                                        |                                                                                                                                                                                                                                                                                                                                                                                                                   |    |
|--------------------------------------------------------|-------------------------------------------------------------------------------------------------------------------------------------------------------------------------------------------------------------------------------------------------------------------------------------------------------------------------------------------------------------------------------------------------------------------|----|
|                                                        | $\text{Mn}(\text{Ni}_3\text{O}_4)_2 + 0.0437 \text{LiClO}_4 + 0.3907 \text{DyClO} + 3.864$<br>$\text{LiCl} + 0.3907 \text{BiClO}$                                                                                                                                                                                                                                                                                 |    |
| $\text{Li}_3\text{Bi}_{0.5}\text{Tb}_{0.5}\text{Cl}_6$ | $0.2475 \text{Li}_{10}\text{Mn}_3\text{Co}_2(\text{NiO}_4)_5 + 0.7525 \text{Li}_3\text{Tb}_{0.5}\text{Bi}_{0.5}\text{Cl}_6 \rightarrow$<br>$0.1584 \text{Mn}(\text{Ni}_3\text{O}_4)_2 + 0.09901 \text{Li}_2\text{Mn}_3\text{NiO}_8 + 0.09901$<br>$\text{Li}_4\text{MnCo}_5\text{O}_{12} + 0.0495 \text{LiClO}_4 + 0.1881 \text{Tb}_2\text{MnNiO}_6 +$<br>$4.089 \text{LiCl} + 0.3762 \text{BiClO}$                | 52 |
| $\text{Li}_3\text{Bi}_{0.5}\text{Sm}_{0.5}\text{Cl}_6$ | $0.2185 \text{Li}_{10}\text{Mn}_3\text{Co}_2(\text{NiO}_4)_5 + 0.7815 \text{Li}_3\text{Sm}_{0.5}\text{Bi}_{0.5}\text{Cl}_6 \rightarrow$<br>$0.1362 \text{Li}_2\text{Mn}_3\text{NiO}_8 + 0.0874 \text{Li}_4\text{MnCo}_5\text{O}_{12} + 0.1594$<br>$\text{Mn}(\text{Ni}_3\text{O}_4)_2 + 0.0437 \text{LiClO}_4 + 0.3907 \text{SmClO} + 0.3907$<br>$\text{BiClO} + 3.864 \text{LiCl}$                               | 55 |
| $\text{Li}_3\text{Sc}_{0.5}\text{Lu}_{0.5}\text{Cl}_6$ | $0.2701 \text{Li}_{10}\text{Mn}_3\text{Co}_2(\text{NiO}_4)_5 + 0.7299 \text{Li}_3\text{Lu}_{0.5}\text{Sc}_{0.5}\text{Cl}_6 \rightarrow$<br>$0.2185 \text{Mn}(\text{Ni}_3\text{O}_4)_2 + 0.108 \text{Li}_4\text{MnCo}_5\text{O}_{12} + 0.03962$<br>$\text{Li}_2\text{Mn}_3\text{NiO}_8 + 0.05402 \text{LiClO}_4 + 0.1825 \text{Lu}_2\text{Mn}_2\text{O}_7 +$<br>$0.1825 \text{Sc}_2\text{O}_3 + 4.325 \text{LiCl}$ | 73 |
| $\text{Li}_3\text{Sc}_{0.5}\text{Tm}_{0.5}\text{Cl}_6$ | $0.2294 \text{Li}_{10}\text{MnCo}(\text{Ni}_2\text{O}_5)_4 + 0.7706 \text{Li}_3\text{Tm}_{0.5}\text{Sc}_{0.5}\text{Cl}_6 \rightarrow$<br>$0.04587 \text{Li}_4\text{MnCo}_5\text{O}_{12} + 0.09174 \text{Tm}_2\text{Mn}_2\text{O}_7 + 0.195$<br>$\text{LiClO}_4 + 1.835 \text{NiO} + 0.1927 \text{Sc}_2\text{O}_3 + 0.2018 \text{TmClO} +$<br>$4.227 \text{LiCl}$                                                  | 93 |
| $\text{Li}_3\text{Sc}_{0.5}\text{Er}_{0.5}\text{Cl}_6$ | $0.2459 \text{Li}_{10}\text{MnCo}(\text{Ni}_2\text{O}_5)_4 + 0.7541 \text{Li}_3\text{Er}_{0.5}\text{Lu}_{0.5}\text{Cl}_6 \rightarrow$<br>$0.04918 \text{Li}_4\text{MnCo}_5\text{O}_{12} + 0.209 \text{LiClO}_4 + 0.09836$<br>$\text{Er}_2\text{Mn}_2\text{O}_7 + 1.967 \text{NiO} + 0.09016 \text{Er}_2\text{O}_3 + 4.316 \text{LiCl} +$<br>$0.1885 \text{Lu}_2\text{O}_3$                                        | 94 |
| $\text{Li}_3\text{Sc}_{0.5}\text{Y}_{0.5}\text{Cl}_6$  | $0.259 \text{Li}_{10}\text{Mn}_3\text{Co}_2(\text{NiO}_4)_5 + 0.741 \text{Li}_3\text{Y}_{0.5}\text{Sc}_{0.5}\text{Cl}_6 \rightarrow$<br>$0.1036 \text{Li}_4\text{MnCo}_5\text{O}_{12} + 0.1889 \text{Mn}(\text{Ni}_3\text{O}_4)_2 + 0.0518$<br>$\text{LiClO}_4 + 0.1615 \text{Li}_2\text{Mn}_3\text{NiO}_8 + 0.1853 \text{Sc}_2\text{O}_3 + 0.3705$<br>$\text{YClO} + 4.024 \text{LiCl}$                          | 60 |
| $\text{Li}_3\text{Sc}_{0.5}\text{Ho}_{0.5}\text{Cl}_6$ | $0.2701 \text{Li}_{10}\text{Mn}_3\text{Co}_2(\text{NiO}_4)_5 + 0.7299 \text{Li}_3\text{Tm}_{0.5}\text{Sc}_{0.5}\text{Cl}_6 \rightarrow$<br>$0.108 \text{Li}_4\text{MnCo}_5\text{O}_{12} + 0.1825 \text{Tm}_2\text{Mn}_2\text{O}_7 + 0.05402$<br>$\text{LiClO}_4 + 0.03962 \text{Li}_2\text{Mn}_3\text{NiO}_8 + 0.2185 \text{Mn}(\text{Ni}_3\text{O}_4)_2 +$<br>$0.1825 \text{Sc}_2\text{O}_3 + 4.325 \text{LiCl}$ | 69 |
| $\text{Li}_3\text{Sc}_{0.5}\text{Dy}_{0.5}\text{Cl}_6$ | $0.259 \text{Li}_{10}\text{Mn}_3\text{Co}_2(\text{NiO}_4)_5 + 0.741 \text{Li}_3\text{Tb}_{0.5}\text{Sc}_{0.5}\text{Cl}_6 \rightarrow$<br>$0.1615 \text{Li}_2\text{Mn}_3\text{NiO}_8 + 0.1889 \text{Mn}(\text{Ni}_3\text{O}_4)_2 + 0.0518 \text{LiClO}_4$<br>$+ 0.1036 \text{Li}_4\text{MnCo}_5\text{O}_{12} + 0.1853 \text{Sc}_2\text{O}_3 + 0.3705 \text{DyClO} +$<br>$4.024 \text{LiCl}$                        | 65 |
| $\text{Li}_3\text{Sc}_{0.5}\text{Tb}_{0.5}\text{Cl}_6$ | $0.2459 \text{Li}_{10}\text{MnCo}(\text{Ni}_2\text{O}_5)_4 + 0.7541 \text{Li}_3\text{Tb}_{0.5}\text{Sc}_{0.5}\text{Cl}_6 \rightarrow$<br>$0.008197 \text{Mn}(\text{Ni}_3\text{O}_4)_2 + 1.73 \text{NiO} + 0.1885 \text{Tb}_2\text{MnNiO}_6 +$<br>$0.04918 \text{Li}_4\text{MnCo}_5\text{O}_{12} + 0.209 \text{LiClO}_4 + 0.1885 \text{Sc}_2\text{O}_3 +$<br>$4.316 \text{LiCl}$                                   | 87 |
| $\text{Li}_3\text{Sc}_{0.5}\text{Sm}_{0.5}\text{Cl}_6$ | $0.2137 \text{Li}_{10}\text{MnCo}(\text{Ni}_2\text{O}_5)_4 + 0.7863 \text{Li}_3\text{Sm}_{0.5}\text{Lu}_{0.5}\text{Cl}_6 \rightarrow$<br>$0.08547 \text{Lu}_2\text{Mn}_2\text{O}_7 + 0.04274 \text{Li}_4\text{MnCo}_5\text{O}_{12} + 0.1816$<br>$\text{LiClO}_4 + 0.3932 \text{SmClO} + 1.709 \text{NiO} + 4.143 \text{LiCl} +$<br>$0.1111 \text{Lu}_2\text{O}_3$                                                 | 92 |
| $\text{Li}_3\text{Lu}_{0.5}\text{Tm}_{0.5}\text{Cl}_6$ | $0.2317 \text{Li}_{10}\text{Mn}_3\text{Co}_2(\text{NiO}_4)_5 + 0.7683 \text{Li}_3\text{Tm}_{0.5}\text{Lu}_{0.5}\text{Cl}_6 \rightarrow$<br>$0.1931 \text{Mn}(\text{Ni}_3\text{O}_4)_2 + 0.09266 \text{Li}_4\text{MnCo}_5\text{O}_{12} + 0.04633$<br>$\text{LiClO}_4 + 0.1921 \text{Lu}_2\text{Mn}_2\text{O}_7 + 0.3591 \text{TmClO} + 0.01255 \text{T}$<br>$\text{m}_2\text{Mn}_2\text{O}_7 + 4.205 \text{LiCl}$  | 73 |
| $\text{Li}_3\text{Lu}_{0.5}\text{Er}_{0.5}\text{Cl}_6$ | $0.2564 \text{Li}_{10}\text{Mn}_3\text{Co}_2(\text{NiO}_4)_5 + 0.7436 \text{Li}_3\text{Er}_{0.5}\text{Lu}_{0.5}\text{Cl}_6 \rightarrow$<br>$0.1859 \text{Lu}_2\text{Mn}_2\text{O}_7 + 0.1026 \text{Li}_4\text{MnCo}_5\text{O}_{12} + 0.05128$<br>$\text{LiClO}_4 + 0.1474 \text{Er}_2\text{Mn}_2\text{O}_7 + 1.282 \text{NiO} + 0.07692 \text{ErClO}$<br>$+ 4.333 \text{LiCl}$                                    | 72 |
| $\text{Li}_3\text{Lu}_{0.5}\text{Y}_{0.5}\text{Cl}_6$  | $0.2309 \text{Li}_{10}\text{Mn}_3\text{Co}_2(\text{NiO}_4)_5 + 0.7691 \text{Li}_3\text{Y}_{0.5}\text{Lu}_{0.5}\text{Cl}_6 \rightarrow$<br>$0.191 \text{Mn}(\text{Ni}_3\text{O}_4)_2 + 0.1923 \text{Lu}_2\text{Mn}_2\text{O}_7 + 0.008223$<br>$\text{Li}_2\text{Mn}_3\text{NiO}_8 + 0.09235 \text{Li}_4\text{MnCo}_5\text{O}_{12} + 0.04617 \text{LiClO}_4 +$<br>$0.3846 \text{YClO} + 4.184 \text{LiCl}$          | 65 |
| $\text{Li}_3\text{Lu}_{0.5}\text{Ho}_{0.5}\text{Cl}_6$ | $0.7368 \text{Li}_3\text{Ho}_{0.5}\text{Lu}_{0.5}\text{Cl}_6 + 0.2632 \text{Li}_{10}\text{Mn}_3\text{Co}_2(\text{NiO}_4)_5 \rightarrow$<br>$0.1316 \text{Mn}(\text{Ni}_3\text{O}_4)_2 + 0.1842 \text{Lu}_2\text{Mn}_2\text{O}_7 + 0.1842$                                                                                                                                                                         | 72 |

---

|                                                        |                                                                                                                                                                                                                                                                                                                                                                                             |    |
|--------------------------------------------------------|---------------------------------------------------------------------------------------------------------------------------------------------------------------------------------------------------------------------------------------------------------------------------------------------------------------------------------------------------------------------------------------------|----|
|                                                        | $\text{Ho}_2\text{MnNiO}_6 + 0.1053 \text{Li}_4\text{MnCo}_5\text{O}_{12} + 0.05263 \text{LiClO}_4 + 0.3421 \text{NiO} + 4.368 \text{LiCl}$                                                                                                                                                                                                                                                 |    |
| $\text{Li}_3\text{Lu}_{0.5}\text{Dy}_{0.5}\text{Cl}_6$ | $0.2309 \text{Li}_{10}\text{Mn}_3\text{Co}_2(\text{NiO}_4)_5 + 0.7691 \text{Li}_3\text{Tb}_{0.5}\text{Lu}_{0.5}\text{Cl}_6 \rightarrow 0.191 \text{Mn}(\text{Ni}_3\text{O}_4)_2 + 0.008223 \text{Li}_2\text{Mn}_3\text{NiO}_8 + 0.09235 \text{Li}_4\text{MnCo}_5\text{O}_{12} + 0.1923 \text{Lu}_2\text{Mn}_2\text{O}_7 + 0.3846 \text{DyClO} + 0.04617 \text{LiClO}_4 + 4.184 \text{LiCl}$ | 71 |
| $\text{Li}_3\text{Lu}_{0.5}\text{Tb}_{0.5}\text{Cl}_6$ | $0.2632 \text{Li}_{10}\text{Mn}_3\text{Co}_2(\text{NiO}_4)_5 + 0.7368 \text{Li}_3\text{Tb}_{0.5}\text{Lu}_{0.5}\text{Cl}_6 \rightarrow 0.1316 \text{Mn}(\text{Ni}_3\text{O}_4)_2 + 0.1842 \text{Tb}_2\text{MnNiO}_6 + 0.1053 \text{Li}_4\text{MnCo}_5\text{O}_{12} + 0.05263 \text{LiClO}_4 + 0.1842 \text{Lu}_2\text{Mn}_2\text{O}_7 + 0.3421 \text{NiO} + 4.368 \text{LiCl}$              | 67 |
| $\text{Li}_3\text{Lu}_{0.5}\text{Sm}_{0.5}\text{Cl}_6$ | $0.2309 \text{Li}_{10}\text{Mn}_3\text{Co}_2(\text{NiO}_4)_5 + 0.7691 \text{Li}_3\text{Sm}_{0.5}\text{Lu}_{0.5}\text{Cl}_6 \rightarrow 0.191 \text{Mn}(\text{Ni}_3\text{O}_4)_2 + 0.008223 \text{Li}_2\text{Mn}_3\text{NiO}_8 + 0.1923 \text{Lu}_2\text{Mn}_2\text{O}_7 + 0.09235 \text{Li}_4\text{MnCo}_5\text{O}_{12} + 0.04617 \text{LiClO}_4 + 0.3846 \text{SmClO} + 4.184 \text{LiCl}$ | 71 |
| $\text{Li}_3\text{Tm}_{0.5}\text{Er}_{0.5}\text{Cl}_6$ | $0.7683 \text{Li}_3\text{Er}_{0.5}\text{Tm}_{0.5}\text{Cl}_6 + 0.2317 \text{Li}_{10}\text{Mn}_3\text{Co}_2(\text{NiO}_4)_5 \rightarrow 0.1931 \text{Mn}(\text{Ni}_3\text{O}_4)_2 + 0.01255 \text{Tm}_2\text{Mn}_2\text{O}_7 + 0.09266 \text{Li}_4\text{MnCo}_5\text{O}_{12} + 0.1921 \text{Er}_2\text{Mn}_2\text{O}_7 + 0.04633 \text{LiClO}_4 + 0.3591 \text{TmClO} + 4.205 \text{LiCl}$   | 69 |
| $\text{Li}_3\text{Tm}_{0.5}\text{Y}_{0.5}\text{Cl}_6$  | $0.7691 \text{Li}_3\text{Y}_{0.5}\text{Tm}_{0.5}\text{Cl}_6 + 0.2309 \text{Li}_{10}\text{Mn}_3\text{Co}_2(\text{NiO}_4)_5 \rightarrow 0.04617 \text{LiClO}_4 + 0.191 \text{Mn}(\text{Ni}_3\text{O}_4)_2 + 0.1923 \text{Tm}_2\text{Mn}_2\text{O}_7 + 0.09235 \text{Li}_4\text{MnCo}_5\text{O}_{12} + 0.008223 \text{Li}_2\text{Mn}_3\text{NiO}_8 + 0.3846 \text{YClO} + 4.184 \text{LiCl}$   | 60 |
| $\text{Li}_3\text{Tm}_{0.5}\text{Ho}_{0.5}\text{Cl}_6$ | $0.2317 \text{Li}_{10}\text{Mn}_3\text{Co}_2(\text{NiO}_4)_5 + 0.7683 \text{Li}_3\text{Ho}_{0.5}\text{Tm}_{0.5}\text{Cl}_6 \rightarrow 0.1931 \text{Mn}(\text{Ni}_3\text{O}_4)_2 + 0.01255 \text{Tm}_2\text{Mn}_2\text{O}_7 + 0.1921 \text{Ho}_2\text{Mn}_2\text{O}_7 + 0.09266 \text{Li}_4\text{MnCo}_5\text{O}_{12} + 0.04633 \text{LiClO}_4 + 0.3591 \text{TmClO} + 4.205 \text{LiCl}$   | 68 |
| $\text{Li}_3\text{Tm}_{0.5}\text{Dy}_{0.5}\text{Cl}_6$ | $0.2309 \text{Li}_{10}\text{Mn}_3\text{Co}_2(\text{NiO}_4)_5 + 0.7691 \text{Li}_3\text{Tb}_{0.5}\text{Tm}_{0.5}\text{Cl}_6 \rightarrow 0.1923 \text{Tm}_2\text{Mn}_2\text{O}_7 + 0.008223 \text{Li}_2\text{Mn}_3\text{NiO}_8 + 0.09235 \text{Li}_4\text{MnCo}_5\text{O}_{12} + 0.191 \text{Mn}(\text{Ni}_3\text{O}_4)_2 + 0.3846 \text{DyClO} + 0.04617 \text{LiClO}_4 + 4.184 \text{LiCl}$ | 65 |
| $\text{Li}_3\text{Tm}_{0.5}\text{Tb}_{0.5}\text{Cl}_6$ | $0.2568 \text{Li}_{10}\text{Mn}_3\text{Co}_2(\text{NiO}_4)_5 + 0.7432 \text{Li}_3\text{Tb}_{0.5}\text{Tm}_{0.5}\text{Cl}_6 \rightarrow 0.183 \text{Mn}(\text{Ni}_3\text{O}_4)_2 + 0.1494 \text{Tm}_2\text{Mn}_2\text{O}_7 + 0.1858 \text{Tb}_2\text{MnNiO}_6 + 0.1027 \text{Li}_4\text{MnCo}_5\text{O}_{12} + 0.05135 \text{LiClO}_4 + 0.07283 \text{TmClO} + 4.335 \text{LiCl}$            | 62 |
| $\text{Li}_3\text{Tm}_{0.5}\text{Sm}_{0.5}\text{Cl}_6$ | $0.2309 \text{Li}_{10}\text{Mn}_3\text{Co}_2(\text{NiO}_4)_5 + 0.7691 \text{Li}_3\text{Sm}_{0.5}\text{Tm}_{0.5}\text{Cl}_6 \rightarrow 0.008223 \text{Li}_2\text{Mn}_3\text{NiO}_8 + 0.191 \text{Mn}(\text{Ni}_3\text{O}_4)_2 + 0.09235 \text{Li}_4\text{MnCo}_5\text{O}_{12} + 0.04617 \text{LiClO}_4 + 0.1923 \text{Tm}_2\text{Mn}_2\text{O}_7 + 0.3846 \text{SmClO} + 4.184 \text{LiCl}$ | 65 |
| $\text{Li}_3\text{Er}_{0.5}\text{Y}_{0.5}\text{Cl}_6$  | $0.2309 \text{Li}_{10}\text{Mn}_3\text{Co}_2(\text{NiO}_4)_5 + 0.7691 \text{Li}_3\text{Y}_{0.5}\text{Er}_{0.5}\text{Cl}_6 \rightarrow 0.09235 \text{Li}_4\text{MnCo}_5\text{O}_{12} + 0.191 \text{Mn}(\text{Ni}_3\text{O}_4)_2 + 0.008223 \text{Li}_2\text{Mn}_3\text{NiO}_8 + 0.1923 \text{Er}_2\text{Mn}_2\text{O}_7 + 0.3846 \text{YClO} + 0.04617 \text{LiClO}_4 + 4.184 \text{LiCl}$   | 61 |
| $\text{Li}_3\text{Er}_{0.5}\text{Ho}_{0.5}\text{Cl}_6$ | $0.2632 \text{Li}_{10}\text{Mn}_3\text{Co}_2(\text{NiO}_4)_5 + 0.7368 \text{Li}_3\text{Ho}_{0.5}\text{Er}_{0.5}\text{Cl}_6 \rightarrow 0.1842 \text{Er}_2\text{Mn}_2\text{O}_7 + 0.1316 \text{Mn}(\text{Ni}_3\text{O}_4)_2 + 0.1053 \text{Li}_4\text{MnCo}_5\text{O}_{12} + 0.1842 \text{Ho}_2\text{MnNiO}_6 + 0.05263 \text{LiClO}_4 + 0.3421 \text{NiO} + 4.368 \text{LiCl}$              | 68 |
| $\text{Li}_3\text{Er}_{0.5}\text{Dy}_{0.5}\text{Cl}_6$ | $0.2309 \text{Li}_{10}\text{Mn}_3\text{Co}_2(\text{NiO}_4)_5 + 0.7691 \text{Li}_3\text{Tb}_{0.5}\text{Er}_{0.5}\text{Cl}_6 \rightarrow 0.008223 \text{Li}_2\text{Mn}_3\text{NiO}_8 + 0.191 \text{Mn}(\text{Ni}_3\text{O}_4)_2 + 0.1923 \text{Er}_2\text{Mn}_2\text{O}_7 + 0.09235 \text{Li}_4\text{MnCo}_5\text{O}_{12} + 0.04617 \text{LiClO}_4 + 0.3846 \text{DyClO} + 4.184 \text{LiCl}$ | 66 |
| $\text{Li}_3\text{Er}_{0.5}\text{Tb}_{0.5}\text{Cl}_6$ | $0.2632 \text{Li}_{10}\text{Mn}_3\text{Co}_2(\text{NiO}_4)_5 + 0.7368 \text{Li}_3\text{Tb}_{0.5}\text{Er}_{0.5}\text{Cl}_6 \rightarrow 0.1316 \text{Mn}(\text{Ni}_3\text{O}_4)_2 + 0.1053 \text{Li}_4\text{MnCo}_5\text{O}_{12} + 0.1842 \text{Tb}_2\text{MnNiO}_6 + 0.1842 \text{Er}_2\text{Mn}_2\text{O}_7 + 0.05263 \text{LiClO}_4 + 0.3421 \text{NiO} + 4.368 \text{LiCl}$              | 62 |

---

|        |                                                        |                                                                                                                                                                                                                                                                                                                                                                                                               |    |
|--------|--------------------------------------------------------|---------------------------------------------------------------------------------------------------------------------------------------------------------------------------------------------------------------------------------------------------------------------------------------------------------------------------------------------------------------------------------------------------------------|----|
|        | $\text{Li}_3\text{Er}_{0.5}\text{Sm}_{0.5}\text{Cl}_6$ | $0.7691 \text{Li}_3\text{Sm}_{0.5}\text{Er}_{0.5}\text{Cl}_6 + 0.2309 \text{Li}_{10}\text{Mn}_3\text{Co}_2(\text{NiO}_4)_5 \rightarrow$<br>$0.09235 \text{Li}_4\text{MnCo}_5\text{O}_{12} + 0.1923 \text{Er}_2\text{Mn}_2\text{O}_7 + 0.008223$<br>$\text{Li}_2\text{Mn}_3\text{NiO}_8 + 0.04617 \text{LiClO}_4 + 0.191 \text{Mn}(\text{Ni}_3\text{O}_4)_2 +$<br>$0.3846 \text{SmClO} + 4.184 \text{LiCl}$    | 66 |
|        | $\text{Li}_3\text{Y}_{0.5}\text{Ho}_{0.5}\text{Cl}_6$  | $0.2309 \text{Li}_{10}\text{Mn}_3\text{Co}_2(\text{NiO}_4)_5 + 0.7691 \text{Li}_3\text{Y}_{0.5}\text{Ho}_{0.5}\text{Cl}_6 \rightarrow$<br>$0.008223 \text{Li}_2\text{Mn}_3\text{NiO}_8 + 0.191 \text{Mn}(\text{Ni}_3\text{O}_4)_2 + 0.1923$<br>$\text{Ho}_2\text{Mn}_2\text{O}_7 + 0.09235 \text{Li}_4\text{MnCo}_5\text{O}_{12} + 0.04617 \text{LiClO}_4 +$<br>$0.3846 \text{YClO} + 4.184 \text{LiCl}$      | 60 |
|        | $\text{Li}_3\text{Y}_{0.5}\text{Dy}_{0.5}\text{Cl}_6$  | $0.2185 \text{Li}_{10}\text{Mn}_3\text{Co}_2(\text{NiO}_4)_5 + 0.7815 \text{Li}_3\text{Y}_{0.5}\text{Tb}_{0.5}\text{Cl}_6 \rightarrow$<br>$0.1362 \text{Li}_2\text{Mn}_3\text{NiO}_8 + 0.0437 \text{LiClO}_4 + 0.1594 \text{Mn}(\text{Ni}_3\text{O}_4)_2$<br>$+ 0.0874 \text{Li}_4\text{MnCo}_5\text{O}_{12} + 0.3907 \text{YClO} + 0.3907 \text{DyClO} +$<br>$3.864 \text{LiCl}$                             | 56 |
|        | $\text{Li}_3\text{Y}_{0.5}\text{Tb}_{0.5}\text{Cl}_6$  | $0.2475 \text{Li}_{10}\text{Mn}_3\text{Co}_2(\text{NiO}_4)_5 + 0.7525 \text{Li}_3\text{Tb}_{0.5}\text{Y}_{0.5}\text{Cl}_6 \rightarrow$<br>$0.09901 \text{Li}_4\text{MnCo}_5\text{O}_{12} + 0.09901 \text{Li}_2\text{Mn}_3\text{NiO}_8 + 0.1584$<br>$\text{Mn}(\text{Ni}_3\text{O}_4)_2 + 0.1881 \text{Tb}_2\text{MnNiO}_6 + 0.0495 \text{LiClO}_4 +$<br>$0.3762 \text{YClO} + 4.089 \text{LiCl}$              | 53 |
|        | $\text{Li}_3\text{Y}_{0.5}\text{Sm}_{0.5}\text{Cl}_6$  | $0.7815 \text{Li}_3\text{Sm}_{0.5}\text{Y}_{0.5}\text{Cl}_6 + 0.2185 \text{Li}_{10}\text{Mn}_3\text{Co}_2(\text{NiO}_4)_5 \rightarrow$<br>$0.0437 \text{LiClO}_4 + 0.0874 \text{Li}_4\text{MnCo}_5\text{O}_{12} + 0.1594$<br>$\text{Mn}(\text{Ni}_3\text{O}_4)_2 + 0.1362 \text{Li}_2\text{Mn}_3\text{NiO}_8 + 0.3907 \text{SmClO} +$<br>$0.3907 \text{YClO} + 3.864 \text{LiCl}$                             | 56 |
|        | $\text{Li}_3\text{Ho}_{0.5}\text{Dy}_{0.5}\text{Cl}_6$ | $0.2309 \text{Li}_{10}\text{Mn}_3\text{Co}_2(\text{NiO}_4)_5 + 0.7691 \text{Li}_3\text{Tb}_{0.5}\text{Ho}_{0.5}\text{Cl}_6 \rightarrow$<br>$0.008223 \text{Li}_2\text{Mn}_3\text{NiO}_8 + 0.191 \text{Mn}(\text{Ni}_3\text{O}_4)_2 + 0.09235$<br>$\text{Li}_4\text{MnCo}_5\text{O}_{12} + 0.1923 \text{Ho}_2\text{Mn}_2\text{O}_7 + 0.04617 \text{LiClO}_4 +$<br>$0.3846 \text{DyClO} + 4.184 \text{LiCl}$    | 65 |
|        | $\text{Li}_3\text{Ho}_{0.5}\text{Tb}_{0.5}\text{Cl}_6$ | $0.2632 \text{Li}_{10}\text{Mn}_3\text{Co}_2(\text{NiO}_4)_5 + 0.7368 \text{Li}_3\text{Tb}_{0.5}\text{Ho}_{0.5}\text{Cl}_6 \rightarrow$<br>$0.04887 \text{Ho}_2\text{MnNiO}_6 + 0.1353 \text{Ho}_2\text{Mn}_2\text{O}_7 + 0.1805$<br>$\text{Mn}(\text{Ni}_3\text{O}_4)_2 + 0.1053 \text{Li}_4\text{MnCo}_5\text{O}_{12} + 0.1842 \text{Tb}_2\text{MnNiO}_6$<br>$+ 0.05263 \text{LiClO}_4 + 4.368 \text{LiCl}$ | 62 |
|        | $\text{Li}_3\text{Ho}_{0.5}\text{Sm}_{0.5}\text{Cl}_6$ | $0.2309 \text{Li}_{10}\text{Mn}_3\text{Co}_2(\text{NiO}_4)_5 + 0.7691 \text{Li}_3\text{Sm}_{0.5}\text{Ho}_{0.5}\text{Cl}_6 \rightarrow$<br>$0.09235 \text{Li}_4\text{MnCo}_5\text{O}_{12} + 0.008223 \text{Li}_2\text{Mn}_3\text{NiO}_8 + 0.1923$<br>$\text{Ho}_2\text{Mn}_2\text{O}_7 + 0.04617 \text{LiClO}_4 + 0.191 \text{Mn}(\text{Ni}_3\text{O}_4)_2 + 0.3846$<br>$\text{SmClO} + 4.184 \text{LiCl}$    | 65 |
|        | $\text{Li}_3\text{Tb}_{0.5}\text{Tb}_{0.5}\text{Cl}_6$ | $0.7525 \text{Li}_3\text{Tb}_{0.5}\text{Tb}_{0.5}\text{Cl}_6 + 0.2475 \text{Li}_{10}\text{Mn}_3\text{Co}_2(\text{NiO}_4)_5 \rightarrow$<br>$0.1584 \text{Mn}(\text{Ni}_3\text{O}_4)_2 + 0.1881 \text{Tb}_2\text{MnNiO}_6 + 0.09901$<br>$\text{Li}_4\text{MnCo}_5\text{O}_{12} + 0.09901 \text{Li}_2\text{Mn}_3\text{NiO}_8 + 0.0495 \text{LiClO}_4 +$<br>$0.3762 \text{DyClO} + 4.089 \text{LiCl}$            | 58 |
|        | $\text{Li}_3\text{Tb}_{0.5}\text{Dy}_{0.5}\text{Cl}_6$ | $0.2185 \text{Li}_{10}\text{Mn}_3\text{Co}_2(\text{NiO}_4)_5 + 0.7815 \text{Li}_3\text{Sm}_{0.5}\text{Tb}_{0.5}\text{Cl}_6 \rightarrow$<br>$0.1362 \text{Li}_2\text{Mn}_3\text{NiO}_8 + 0.0874 \text{Li}_4\text{MnCo}_5\text{O}_{12} + 0.1594$<br>$\text{Mn}(\text{Ni}_3\text{O}_4)_2 + 0.0437 \text{LiClO}_4 + 0.3907 \text{SmClO} + 0.3907$<br>$\text{DyClO} + 3.864 \text{LiCl}$                           | 61 |
|        | $\text{Li}_3\text{Tb}_{0.5}\text{Sm}_{0.5}\text{Cl}_6$ | $0.2475 \text{Li}_{10}\text{Mn}_3\text{Co}_2(\text{NiO}_4)_5 + 0.7525 \text{Li}_3\text{Tb}_{0.5}\text{Sm}_{0.5}\text{Cl}_6 \rightarrow$<br>$0.09901 \text{Li}_2\text{Mn}_3\text{NiO}_8 + 0.1584 \text{Mn}(\text{Ni}_3\text{O}_4)_2 + 0.09901$<br>$\text{Li}_4\text{MnCo}_5\text{O}_{12} + 0.0495 \text{LiClO}_4 + 0.1881 \text{Tb}_2\text{MnNiO}_6 +$<br>$0.3762 \text{SmClO} + 4.089 \text{LiCl}$            | 59 |
|        | $\text{Li}_3\text{In}_{0.5}\text{Lu}_{0.5}\text{Cl}_6$ | $0.5882 \text{Li}_5\text{MnCoNi}_3\text{O}_{10} + 0.4118 \text{Li}_6\text{LuInCl}_{12} \rightarrow 0.05882$<br>$\text{Mn}(\text{Ni}_3\text{O}_4)_2 + 0.1176 \text{Li}_4\text{MnCo}_5\text{O}_{12} + 0.1324 \text{LiClO}_4 +$<br>$0.2059 \text{Lu}_2\text{Mn}_2\text{O}_7 + 4.809 \text{LiCl} + 1.412 \text{NiO} + 0.2059$<br>$\text{In}_2\text{O}_3$                                                          | 65 |
| NMC622 | $\text{Li}_3\text{In}_{0.5}\text{Tm}_{0.5}\text{Cl}_6$ | $0.5882 \text{Li}_5\text{MnCoNi}_3\text{O}_{10} + 0.4118 \text{Li}_6\text{TmInCl}_{12} \rightarrow 0.2059 \text{T}$<br>$\text{m}_2\text{Mn}_2\text{O}_7 + 0.05882 \text{Mn}(\text{Ni}_3\text{O}_4)_2 + 0.1176 \text{Li}_4\text{MnCo}_5\text{O}_{12} +$<br>$1.412 \text{NiO} + 0.1324 \text{LiClO}_4 + 4.809 \text{LiCl} + 0.2059 \text{In}_2\text{O}_3$                                                       | 60 |
|        | $\text{Li}_3\text{In}_{0.5}\text{Er}_{0.5}\text{Cl}_6$ | $0.5882 \text{Li}_5\text{MnCoNi}_3\text{O}_{10} + 0.4118 \text{Li}_6\text{ErInCl}_{12} \rightarrow 0.1176$<br>$\text{Li}_4\text{MnCo}_5\text{O}_{12} + 0.2059 \text{Er}_2\text{Mn}_2\text{O}_7 + 0.05882 \text{Mn}(\text{Ni}_3\text{O}_4)_2 +$<br>$1.412 \text{NiO} + 0.1324 \text{LiClO}_4 + 4.809 \text{LiCl} + 0.2059 \text{In}_2\text{O}_3$                                                               | 61 |
|        | $\text{Li}_3\text{In}_{0.5}\text{Ho}_{0.5}\text{Cl}_6$ | $0.4118 \text{Li}_6\text{HoInCl}_{12} + 0.5882 \text{Li}_5\text{MnCoNi}_3\text{O}_{10} \rightarrow 0.1176$<br>$\text{Li}_4\text{MnCo}_5\text{O}_{12} + 0.2605 \text{Mn}(\text{Ni}_3\text{O}_4)_2 + 0.004202 \text{Ho}_2\text{Mn}_2\text{O}_7$                                                                                                                                                                 | 61 |

|                                                                     |                                                                                                                                                                                                                                                                                                                                                                                                                      |    |
|---------------------------------------------------------------------|----------------------------------------------------------------------------------------------------------------------------------------------------------------------------------------------------------------------------------------------------------------------------------------------------------------------------------------------------------------------------------------------------------------------|----|
|                                                                     | + 0.2017 Ho <sub>2</sub> MnNiO <sub>6</sub> + 0.1324 LiClO <sub>4</sub> + 4.809 LiCl + 0.2059 In <sub>2</sub> O <sub>3</sub>                                                                                                                                                                                                                                                                                         |    |
| Li <sub>3</sub> Bi <sub>0.5</sub> Sc <sub>0.5</sub> Cl <sub>6</sub> | 0.5563 Li <sub>5</sub> MnCoNi <sub>3</sub> O <sub>10</sub> + 0.4437 Li <sub>6</sub> ScBiCl <sub>12</sub> → 0.0589 Li <sub>2</sub> Mn <sub>3</sub> NiO <sub>8</sub> + 0.1252 LiClO <sub>4</sub> + 0.2683 Mn(Ni <sub>3</sub> O <sub>4</sub> ) <sub>2</sub> + 0.1113 Li <sub>4</sub> MnCo <sub>5</sub> O <sub>12</sub> + 4.756 LiCl + 0.4437 BiClO + 0.2219 Sc <sub>2</sub> O <sub>3</sub>                              | 69 |
| Li <sub>3</sub> Bi <sub>0.5</sub> Lu <sub>0.5</sub> Cl <sub>6</sub> | 0.5435 Li <sub>5</sub> MnCoNi <sub>3</sub> O <sub>10</sub> + 0.4565 Li <sub>6</sub> LuBiCl <sub>12</sub> → 0.1087 Li <sub>4</sub> MnCo <sub>5</sub> O <sub>12</sub> + 0.2174 Lu <sub>2</sub> Mn <sub>2</sub> O <sub>7</sub> + 0.1223 LiClO <sub>4</sub> + 1.63 NiO + 4.899 LiCl + 0.4565 BiClO + 0.01087 Lu <sub>2</sub> O <sub>3</sub>                                                                              | 72 |
| Li <sub>3</sub> Bi <sub>0.5</sub> Tm <sub>0.5</sub> Cl <sub>6</sub> | 0.5405 Li <sub>5</sub> MnCoNi <sub>3</sub> O <sub>10</sub> + 0.4595 Li <sub>6</sub> TmBiCl <sub>12</sub> → 0.1081 Li <sub>4</sub> MnCo <sub>5</sub> O <sub>12</sub> + 0.2162 Tm <sub>2</sub> Mn <sub>2</sub> O <sub>7</sub> + 0.1216 LiClO <sub>4</sub> + 0.02703 TmClO + 1.622 NiO + 4.905 LiCl + 0.4595 BiClO                                                                                                      | 67 |
| Li <sub>3</sub> Bi <sub>0.5</sub> Er <sub>0.5</sub> Cl <sub>6</sub> | 0.5435 Li <sub>5</sub> MnCoNi <sub>3</sub> O <sub>10</sub> + 0.4565 Li <sub>6</sub> ErBiCl <sub>12</sub> → 0.2174 Er <sub>2</sub> Mn <sub>2</sub> O <sub>7</sub> + 0.1087 Li <sub>4</sub> MnCo <sub>5</sub> O <sub>12</sub> + 0.1223 LiClO <sub>4</sub> + 1.63 NiO + 4.899 LiCl + 0.4565 BiClO + 0.01087 Er <sub>2</sub> O <sub>3</sub>                                                                              | 67 |
| Li <sub>3</sub> Bi <sub>0.5</sub> Y <sub>0.5</sub> Cl <sub>6</sub>  | 0.5007 Li <sub>5</sub> MnCoNi <sub>3</sub> O <sub>10</sub> + 0.4993 Li <sub>6</sub> YBiCl <sub>12</sub> → 0.2415 Mn(Ni <sub>3</sub> O <sub>4</sub> ) <sub>2</sub> + 0.05302 Li <sub>2</sub> Mn <sub>3</sub> NiO <sub>8</sub> + 0.1127 LiClO <sub>4</sub> + 0.1001 Li <sub>4</sub> MnCo <sub>5</sub> O <sub>12</sub> + 0.4993 YClO + 4.88 LiCl + 0.4993 BiClO                                                         | 57 |
| Li <sub>3</sub> Bi <sub>0.5</sub> Ho <sub>0.5</sub> Cl <sub>6</sub> | 0.5435 Li <sub>5</sub> MnCoNi <sub>3</sub> O <sub>10</sub> + 0.4565 Li <sub>6</sub> HoBiCl <sub>12</sub> → 0.1223 LiClO <sub>4</sub> + 0.2283 Ho <sub>2</sub> MnNiO <sub>6</sub> + 0.1087 Li <sub>4</sub> MnCo <sub>5</sub> O <sub>12</sub> + 0.2065 Mn(Ni <sub>3</sub> O <sub>4</sub> ) <sub>2</sub> + 0.163 NiO + 4.899 LiCl + 0.4565 BiClO                                                                        | 67 |
| Li <sub>3</sub> Bi <sub>0.5</sub> Dy <sub>0.5</sub> Cl <sub>6</sub> | 0.4652 Li <sub>6</sub> DyBiCl <sub>12</sub> + 0.5348 Li <sub>5</sub> MnCoNi <sub>3</sub> O <sub>10</sub> → 0.107 Li <sub>4</sub> MnCo <sub>5</sub> O <sub>12</sub> + 0.1925 Dy <sub>2</sub> MnNiO <sub>6</sub> + 0.2353 Mn(Ni <sub>3</sub> O <sub>4</sub> ) <sub>2</sub> + 0.1203 LiClO <sub>4</sub> + 0.08021 DyClO + 4.917 LiCl + 0.4652 BiClO                                                                     | 63 |
| Li <sub>3</sub> Bi <sub>0.5</sub> Tb <sub>0.5</sub> Cl <sub>6</sub> | 0.5435 Li <sub>5</sub> MnCoNi <sub>3</sub> O <sub>10</sub> + 0.4565 Li <sub>6</sub> TbBiCl <sub>12</sub> → 0.2065 Mn(Ni <sub>3</sub> O <sub>4</sub> ) <sub>2</sub> + 0.1087 Li <sub>4</sub> MnCo <sub>5</sub> O <sub>12</sub> + 0.1223 LiClO <sub>4</sub> + 0.2283 Tb <sub>2</sub> MnNiO <sub>6</sub> + 0.163 NiO + 4.899 LiCl + 0.4565 BiClO                                                                        | 61 |
| Li <sub>3</sub> Bi <sub>0.5</sub> Sm <sub>0.5</sub> Cl <sub>6</sub> | 0.5007 Li <sub>5</sub> MnCoNi <sub>3</sub> O <sub>10</sub> + 0.4993 L <sub>6</sub> SmBiCl <sub>12</sub> → 0.05302 Li <sub>2</sub> Mn <sub>3</sub> NiO <sub>8</sub> + 0.1001 Li <sub>4</sub> MnCo <sub>5</sub> O <sub>12</sub> + 0.2415 Mn(Ni <sub>3</sub> O <sub>4</sub> ) <sub>2</sub> + 0.1127 LiClO <sub>4</sub> + 0.4993 SmClO + 0.4993 BiClO + 4.88 LiCl                                                        | 63 |
| Li <sub>3</sub> Sc <sub>0.5</sub> Lu <sub>0.5</sub> Cl <sub>6</sub> | 0.5882 Li <sub>5</sub> MnCoNi <sub>3</sub> O <sub>10</sub> + 0.4118 Li <sub>6</sub> LuScCl <sub>12</sub> → 0.05882 Mn(Ni <sub>3</sub> O <sub>4</sub> ) <sub>2</sub> + 1.412 NiO + 0.1176 Li <sub>4</sub> MnCo <sub>5</sub> O <sub>12</sub> + 0.1324 LiClO <sub>4</sub> + 0.2059 Lu <sub>2</sub> Mn <sub>2</sub> O <sub>7</sub> + 0.2059 Sc <sub>2</sub> O <sub>3</sub> + 4.809 LiCl                                  | 83 |
| Li <sub>3</sub> Sc <sub>0.5</sub> Tm <sub>0.5</sub> Cl <sub>6</sub> | 0.5618 Li <sub>5</sub> MnCoNi <sub>3</sub> O <sub>10</sub> + 0.4382 Li <sub>6</sub> TmScCl <sub>12</sub> → 0.1124 Li <sub>4</sub> MnCo <sub>5</sub> O <sub>12</sub> + 0.08427 Tm <sub>2</sub> Mn <sub>2</sub> O <sub>7</sub> + 0.1264 LiClO <sub>4</sub> + 0.2809 Mn(Ni <sub>3</sub> O <sub>4</sub> ) <sub>2</sub> + 0.2191 Sc <sub>2</sub> O <sub>3</sub> + 0.2697 TmClO + 4.862 LiCl                               | 78 |
| Li <sub>3</sub> Sc <sub>0.5</sub> Er <sub>0.5</sub> Cl <sub>6</sub> | 0.4118 Li <sub>6</sub> ErScCl <sub>12</sub> + 0.5882 Li <sub>5</sub> MnCoNi <sub>3</sub> O <sub>10</sub> → 0.1176 Li <sub>4</sub> MnCo <sub>5</sub> O <sub>12</sub> + 0.1324 LiClO <sub>4</sub> + 0.2059 Er <sub>2</sub> Mn <sub>2</sub> O <sub>7</sub> + 0.05882 Mn(Ni <sub>3</sub> O <sub>4</sub> ) <sub>2</sub> + 0.2059 Sc <sub>2</sub> O <sub>3</sub> + 1.412 NiO + 4.809 LiCl                                  | 79 |
| Li <sub>3</sub> Sc <sub>0.5</sub> Y <sub>0.5</sub> Cl <sub>6</sub>  | 0.5563 Li <sub>5</sub> MnCoNi <sub>3</sub> O <sub>10</sub> + 0.4437 Li <sub>6</sub> YScCl <sub>12</sub> → 0.1113 Li <sub>4</sub> MnCo <sub>5</sub> O <sub>12</sub> + 0.2683 Mn(Ni <sub>3</sub> O <sub>4</sub> ) <sub>2</sub> + 0.1252 LiClO <sub>4</sub> + 0.0589 Li <sub>2</sub> Mn <sub>3</sub> NiO <sub>8</sub> + 0.2219 Sc <sub>2</sub> O <sub>3</sub> + 0.4437 YClO + 4.756 LiCl                                | 70 |
| Li <sub>3</sub> Sc <sub>0.5</sub> Ho <sub>0.5</sub> Cl <sub>6</sub> | 0.5882 Li <sub>5</sub> MnCoNi <sub>3</sub> O <sub>10</sub> + 0.4118 Li <sub>6</sub> HoScCl <sub>12</sub> → 0.2605 Mn(Ni <sub>3</sub> O <sub>4</sub> ) <sub>2</sub> + 0.004202 Ho <sub>2</sub> Mn <sub>2</sub> O <sub>7</sub> + 0.1176 Li <sub>4</sub> MnCo <sub>5</sub> O <sub>12</sub> + 0.2017 Ho <sub>2</sub> MnNiO <sub>6</sub> + 0.1324 LiClO <sub>4</sub> + 0.2059 Sc <sub>2</sub> O <sub>3</sub> + 4.809 LiCl | 78 |
| Li <sub>3</sub> Sc <sub>0.5</sub> Dy <sub>0.5</sub> Cl <sub>6</sub> | 0.5563 Li <sub>5</sub> MnCoNi <sub>3</sub> O <sub>10</sub> + 0.4437 Li <sub>6</sub> DyScCl <sub>12</sub> → 0.0589                                                                                                                                                                                                                                                                                                    | 75 |

|                                                        |                                                                                                                                                                                                                                                                                                                                                         |    |
|--------------------------------------------------------|---------------------------------------------------------------------------------------------------------------------------------------------------------------------------------------------------------------------------------------------------------------------------------------------------------------------------------------------------------|----|
|                                                        | $\text{Li}_2\text{Mn}_3\text{NiO}_8 + 0.2683 \text{Mn}(\text{Ni}_3\text{O}_4)_2 + 0.1252 \text{LiClO}_4 + 0.1113 \text{Li}_4\text{MnCo}_5\text{O}_{12} + 0.2219 \text{Sc}_2\text{O}_3 + 0.4437 \text{DyClO} + 4.756 \text{LiCl}$                                                                                                                        |    |
| $\text{Li}_3\text{Sc}_{0.5}\text{Tb}_{0.5}\text{Cl}_6$ | $0.5886 \text{Li}_5\text{MnCoNi}_3\text{O}_{10} + 0.4114 \text{Li}_6\text{TbScCl}_{12} \rightarrow 0.00182 \text{Li}_2\text{Mn}_3\text{NiO}_8 + 0.2597 \text{Mn}(\text{Ni}_3\text{O}_4)_2 + 0.2057 \text{Tb}_2\text{MnNiO}_6 + 0.1177 \text{Li}_4\text{MnCo}_5\text{O}_{12} + 0.1324 \text{LiClO}_4 + 0.2057 \text{Sc}_2\text{O}_3 + 4.804 \text{LiCl}$ | 73 |
| $\text{Li}_3\text{Sc}_{0.5}\text{Sm}_{0.5}\text{Cl}_6$ | $0.5563 \text{Li}_5\text{MnCoNi}_3\text{O}_{10} + 0.4437 \text{Li}_6\text{SmScCl}_{12} \rightarrow 0.2683 \text{Mn}(\text{Ni}_3\text{O}_4)_2 + 0.1113 \text{Li}_4\text{MnCo}_5\text{O}_{12} + 0.0589 \text{Li}_2\text{Mn}_3\text{NiO}_8 + 0.1252 \text{LiClO}_4 + 0.4437 \text{SmClO} + 4.756 \text{LiCl} + 0.2219 \text{Sc}_2\text{O}_3$               | 76 |
| $\text{Li}_3\text{Lu}_{0.5}\text{Tm}_{0.5}\text{Cl}_6$ | $0.5435 \text{Li}_5\text{MnCoNi}_3\text{O}_{10} + 0.4565 \text{Li}_6\text{TmLuCl}_{12} \rightarrow 0.1087 \text{Li}_4\text{MnCo}_5\text{O}_{12} + 0.1223 \text{LiClO}_4 + 0.2174 \text{Lu}_2\text{Mn}_2\text{O}_7 + 1.63 \text{NiO} + 0.4565 \text{TmClO} + 4.899 \text{LiCl} + 0.01087 \text{Lu}_2\text{O}_3$                                          | 81 |
| $\text{Li}_3\text{Lu}_{0.5}\text{Er}_{0.5}\text{Cl}_6$ | $0.5882 \text{Li}_5\text{MnCoNi}_3\text{O}_{10} + 0.4118 \text{Li}_6\text{ErLuCl}_{12} \rightarrow 0.02941 \text{Lu}_2\text{Mn}_2\text{O}_7 + 0.1176 \text{Li}_4\text{MnCo}_5\text{O}_{12} + 0.1324 \text{LiClO}_4 + 0.2059 \text{Er}_2\text{Mn}_2\text{O}_7 + 1.765 \text{NiO} + 4.809 \text{LiCl} + 0.1765 \text{Lu}_2\text{O}_3$                     | 80 |
| $\text{Li}_3\text{Lu}_{0.5}\text{Y}_{0.5}\text{Cl}_6$  | $0.5435 \text{Li}_5\text{MnCoNi}_3\text{O}_{10} + 0.4565 \text{Li}_6\text{YLuCl}_{12} \rightarrow 0.2174 \text{Lu}_2\text{Mn}_2\text{O}_7 + 0.1087 \text{Li}_4\text{MnCo}_5\text{O}_{12} + 0.1223 \text{LiClO}_4 + 0.4565 \text{YClO} + 1.63 \text{NiO} + 4.899 \text{LiCl} + 0.01087 \text{Lu}_2\text{O}_3$                                            | 74 |
| $\text{Li}_3\text{Lu}_{0.5}\text{Ho}_{0.5}\text{Cl}_6$ | $0.4118 \text{Li}_6\text{HoLuCl}_{12} + 0.5882 \text{Li}_5\text{MnCoNi}_3\text{O}_{10} \rightarrow 0.1324 \text{Lu}_2\text{Mn}_2\text{O}_7 + 0.2059 \text{Ho}_2\text{MnNiO}_6 + 0.1176 \text{Li}_4\text{MnCo}_5\text{O}_{12} + 0.1324 \text{LiClO}_4 + 1.559 \text{NiO} + 4.809 \text{LiCl} + 0.07353 \text{Lu}_2\text{O}_3$                            | 80 |
| $\text{Li}_3\text{Lu}_{0.5}\text{Dy}_{0.5}\text{Cl}_6$ | $0.5435 \text{Li}_5\text{MnCoNi}_3\text{O}_{10} + 0.4565 \text{Li}_6\text{DyLuCl}_{12} \rightarrow 1.63 \text{NiO} + 0.1087 \text{Li}_4\text{MnCo}_5\text{O}_{12} + 0.2174 \text{Lu}_2\text{Mn}_2\text{O}_7 + 0.4565 \text{DyClO} + 0.1223 \text{LiClO}_4 + 4.899 \text{LiCl} + 0.01087 \text{Lu}_2\text{O}_3$                                          | 79 |
| $\text{Li}_3\text{Lu}_{0.5}\text{Tb}_{0.5}\text{Cl}_6$ | $0.5882 \text{Li}_5\text{MnCoNi}_3\text{O}_{10} + 0.4118 \text{Li}_6\text{TbLuCl}_{12} \rightarrow 0.2059 \text{Tb}_2\text{MnNiO}_6 + 0.1176 \text{Li}_4\text{MnCo}_5\text{O}_{12} + 0.1324 \text{LiClO}_4 + 0.1324 \text{Lu}_2\text{Mn}_2\text{O}_7 + 1.559 \text{NiO} + 4.809 \text{LiCl} + 0.07353 \text{Lu}_2\text{O}_3$                            | 75 |
| $\text{Li}_3\text{Lu}_{0.5}\text{Sm}_{0.5}\text{Cl}_6$ | $0.5435 \text{Li}_5\text{MnCoNi}_3\text{O}_{10} + 0.4565 \text{Li}_6\text{SmLuCl}_{12} \rightarrow 0.2174 \text{Lu}_2\text{Mn}_2\text{O}_7 + 0.1087 \text{Li}_4\text{MnCo}_5\text{O}_{12} + 0.1223 \text{LiClO}_4 + 0.4565 \text{SmClO} + 1.63 \text{NiO} + 4.899 \text{LiCl} + 0.01087 \text{Lu}_2\text{O}_3$                                          | 79 |
| $\text{Li}_3\text{Tm}_{0.5}\text{Er}_{0.5}\text{Cl}_6$ | $0.4595 \text{Li}_6\text{ErTmCl}_{12} + 0.5405 \text{Li}_5\text{MnCoNi}_3\text{O}_{10} \rightarrow 0.1081 \text{Li}_4\text{MnCo}_5\text{O}_{12} + 0.2162 \text{Er}_2\text{Mn}_2\text{O}_7 + 1.622 \text{NiO} + 0.02703 \text{ErClO} + 0.1216 \text{LiClO}_4 + 0.4595 \text{TmClO} + 4.905 \text{LiCl}$                                                  | 77 |
| $\text{Li}_3\text{Tm}_{0.5}\text{Y}_{0.5}\text{Cl}_6$  | $0.4595 \text{Li}_6\text{YTmCl}_{12} + 0.5405 \text{Li}_5\text{MnCoNi}_3\text{O}_{10} \rightarrow 0.1216 \text{LiClO}_4 + 0.2162 \text{Tm}_2\text{Mn}_2\text{O}_7 + 0.1081 \text{Li}_4\text{MnCo}_5\text{O}_{12} + 1.622 \text{NiO} + 0.4595 \text{YClO} + 0.02703 \text{TmClO} + 4.905 \text{LiCl}$                                                    | 68 |
| $\text{Li}_3\text{Tm}_{0.5}\text{Ho}_{0.5}\text{Cl}_6$ | $0.5435 \text{Li}_5\text{MnCoNi}_3\text{O}_{10} + 0.4565 \text{Li}_6\text{HoTmCl}_{12} \rightarrow 0.2065 \text{Mn}(\text{Ni}_3\text{O}_4)_2 + 0.2283 \text{Ho}_2\text{MnNiO}_6 + 0.1087 \text{Li}_4\text{MnCo}_5\text{O}_{12} + 0.1223 \text{LiClO}_4 + 0.163 \text{NiO} + 0.4565 \text{TmClO} + 4.899 \text{LiCl}$                                    | 76 |
| $\text{Li}_3\text{Tm}_{0.5}\text{Dy}_{0.5}\text{Cl}_6$ | $0.5063 \text{Li}_5\text{MnCoNi}_3\text{O}_{10} + 0.4937 \text{Li}_6\text{DyTmCl}_{12} \rightarrow 0.07595 \text{Tm}_2\text{Mn}_2\text{O}_7 + 0.1013 \text{Li}_4\text{MnCo}_5\text{O}_{12} + 0.2532 \text{Mn}(\text{Ni}_3\text{O}_4)_2 + 0.4937 \text{DyClO} + 0.1139 \text{LiClO}_4 + 0.3418 \text{TmClO} + 4.975 \text{LiCl}$                         | 73 |
| $\text{Li}_3\text{Tm}_{0.5}\text{Tb}_{0.5}\text{Cl}_6$ | $0.5696 \text{Li}_5\text{MnCoNi}_3\text{O}_{10} + 0.4304 \text{Li}_6\text{TbTmCl}_{12} \rightarrow 0.1203 \text{Tm}_2\text{Mn}_2\text{O}_7 + 0.2152 \text{Tb}_2\text{MnNiO}_6 + 0.1139 \text{Li}_4\text{MnCo}_5\text{O}_{12} + 0.1282 \text{LiClO}_4 + 1.494 \text{NiO} + 0.1899 \text{TmClO} + 4.847 \text{LiCl}$                                      | 70 |
| $\text{Li}_3\text{Tm}_{0.5}\text{Sm}_{0.5}\text{Cl}_6$ | $0.5063 \text{Li}_5\text{MnCoNi}_3\text{O}_{10} + 0.4937 \text{Li}_6\text{SmTmCl}_{12} \rightarrow 0.2532 \text{Mn}(\text{Ni}_3\text{O}_4)_2 + 0.1013 \text{Li}_4\text{MnCo}_5\text{O}_{12} + 0.1139 \text{LiClO}_4 +$                                                                                                                                  | 74 |

|        |                                                        |                                                                                                                                                                                                                                                                                                                                           |    |
|--------|--------------------------------------------------------|-------------------------------------------------------------------------------------------------------------------------------------------------------------------------------------------------------------------------------------------------------------------------------------------------------------------------------------------|----|
|        |                                                        | $0.07595 \text{ Tm}_2\text{Mn}_2\text{O}_7 + 0.4937 \text{ SmClO} + 0.3418 \text{ TmClO} + 4.975 \text{ LiCl}$                                                                                                                                                                                                                            |    |
|        | $\text{Li}_3\text{Er}_{0.5}\text{Y}_{0.5}\text{Cl}_6$  | $0.5435 \text{ Li}_5\text{MnCoNi}_3\text{O}_{10} + 0.4565 \text{ Li}_6\text{YErCl}_{12} \rightarrow 0.1087 \text{ Li}_4\text{MnCo}_5\text{O}_{12} + 0.2174 \text{ Er}_2\text{Mn}_2\text{O}_7 + 0.4565 \text{ YClO} + 0.1223 \text{ LiClO}_4 + 1.63 \text{ NiO} + 4.899 \text{ LiCl} + 0.01087 \text{ Er}_2\text{O}_3$                     | 69 |
|        | $\text{Li}_3\text{Er}_{0.5}\text{Ho}_{0.5}\text{Cl}_6$ | $0.5696 \text{ Li}_5\text{MnCoNi}_3\text{O}_{10} + 0.4304 \text{ Li}_6\text{HoErCl}_{12} \rightarrow 0.1203 \text{ Er}_2\text{Mn}_2\text{O}_7 + 0.1139 \text{ Li}_4\text{MnCo}_5\text{O}_{12} + 0.2152 \text{ Ho}_2\text{MnNiO}_6 + 0.1282 \text{ LiClO}_4 + 0.1899 \text{ ErClO} + 1.494 \text{ NiO} + 4.847 \text{ LiCl}$               | 76 |
|        | $\text{Li}_3\text{Er}_{0.5}\text{Dy}_{0.5}\text{Cl}_6$ | $0.5405 \text{ Li}_5\text{MnCoNi}_3\text{O}_{10} + 0.4595 \text{ Li}_6\text{DyErCl}_{12} \rightarrow 0.2162 \text{ Er}_2\text{Mn}_2\text{O}_7 + 1.622 \text{ NiO} + 0.1081 \text{ Li}_4\text{MnCo}_5\text{O}_{12} + 0.02703 \text{ ErClO} + 0.1216 \text{ LiClO}_4 + 0.4595 \text{ DyClO} + 4.905 \text{ LiCl}$                           | 74 |
|        | $\text{Li}_3\text{Er}_{0.5}\text{Tb}_{0.5}\text{Cl}_6$ | $0.5882 \text{ Li}_5\text{MnCoNi}_3\text{O}_{10} + 0.4118 \text{ Li}_6\text{TbErCl}_{12} \rightarrow 0.1176 \text{ Li}_4\text{MnCo}_5\text{O}_{12} + 0.2059 \text{ Tb}_2\text{MnNiO}_6 + 0.1324 \text{ Er}_2\text{Mn}_2\text{O}_7 + 0.1324 \text{ LiClO}_4 + 1.559 \text{ NiO} + 4.809 \text{ LiCl} + 0.07353 \text{ Er}_2\text{O}_3$     | 70 |
|        | $\text{Li}_3\text{Er}_{0.5}\text{Sm}_{0.5}\text{Cl}_6$ | $0.4595 \text{ Li}_6\text{SmErCl}_{12} + 0.5405 \text{ Li}_5\text{MnCoNi}_3\text{O}_{10} \rightarrow 0.1081 \text{ Li}_4\text{MnCo}_5\text{O}_{12} + 0.2162 \text{ Er}_2\text{Mn}_2\text{O}_7 + 0.1216 \text{ LiClO}_4 + 1.622 \text{ NiO} + 0.4595 \text{ SmClO} + 0.02703 \text{ ErClO} + 4.905 \text{ LiCl}$                           | 74 |
|        | $\text{Li}_3\text{Y}_{0.5}\text{Ho}_{0.5}\text{Cl}_6$  | $0.5435 \text{ Li}_5\text{MnCoNi}_3\text{O}_{10} + 0.4565 \text{ Li}_6\text{YHoCl}_{12} \rightarrow 0.2065 \text{ Mn}(\text{Ni}_3\text{O}_4)_2 + 0.1087 \text{ Li}_4\text{MnCo}_5\text{O}_{12} + 0.2283 \text{ Ho}_2\text{MnNiO}_6 + 0.1223 \text{ LiClO}_4 + 0.4565 \text{ YClO} + 0.163 \text{ NiO} + 4.899 \text{ LiCl}$               | 69 |
|        | $\text{Li}_3\text{Y}_{0.5}\text{Dy}_{0.5}\text{Cl}_6$  | $0.5007 \text{ Li}_5\text{MnCoNi}_3\text{O}_{10} + 0.4993 \text{ Li}_6\text{DyYCl}_{12} \rightarrow 0.05302 \text{ Li}_2\text{Mn}_3\text{NiO}_8 + 0.1127 \text{ LiClO}_4 + 0.2415 \text{ Mn}(\text{Ni}_3\text{O}_4)_2 + 0.1001 \text{ Li}_4\text{MnCo}_5\text{O}_{12} + 0.4993 \text{ YClO} + 0.4993 \text{ DyClO} + 4.88 \text{ LiCl}$   | 64 |
|        | $\text{Li}_3\text{Y}_{0.5}\text{Tb}_{0.5}\text{Cl}_6$  | $0.5435 \text{ Li}_5\text{MnCoNi}_3\text{O}_{10} + 0.4565 \text{ Li}_6\text{TbYCl}_{12} \rightarrow 0.1087 \text{ Li}_4\text{MnCo}_5\text{O}_{12} + 0.2065 \text{ Mn}(\text{Ni}_3\text{O}_4)_2 + 0.2283 \text{ Tb}_2\text{MnNiO}_6 + 0.1223 \text{ LiClO}_4 + 0.163 \text{ NiO} + 0.4565 \text{ YClO} + 4.899 \text{ LiCl}$               | 63 |
|        | $\text{Li}_3\text{Y}_{0.5}\text{Sm}_{0.5}\text{Cl}_6$  | $0.4993 \text{ Li}_6\text{SmYCl}_{12} + 0.5007 \text{ Li}_5\text{MnCoNi}_3\text{O}_{10} \rightarrow 0.1127 \text{ LiClO}_4 + 0.1001 \text{ Li}_4\text{MnCo}_5\text{O}_{12} + 0.2415 \text{ Mn}(\text{Ni}_3\text{O}_4)_2 + 0.05302 \text{ Li}_2\text{Mn}_3\text{NiO}_8 + 0.4993 \text{ SmClO} + 0.4993 \text{ YClO} + 4.88 \text{ LiCl}$   | 65 |
|        | $\text{Li}_3\text{Ho}_{0.5}\text{Dy}_{0.5}\text{Cl}_6$ | $0.5435 \text{ Li}_5\text{MnCoNi}_3\text{O}_{10} + 0.4565 \text{ Li}_6\text{DyHoCl}_{12} \rightarrow 0.2065 \text{ Mn}(\text{Ni}_3\text{O}_4)_2 + 0.1087 \text{ Li}_4\text{MnCo}_5\text{O}_{12} + 0.163 \text{ NiO} + 0.2283 \text{ Ho}_2\text{MnNiO}_6 + 0.1223 \text{ LiClO}_4 + 0.4565 \text{ DyClO} + 4.899 \text{ LiCl}$             | 74 |
|        | $\text{Li}_3\text{Ho}_{0.5}\text{Tb}_{0.5}\text{Cl}_6$ | $0.5882 \text{ Li}_5\text{MnCoNi}_3\text{O}_{10} + 0.4118 \text{ Li}_6\text{TbHoCl}_{12} \rightarrow 0.2059 \text{ Ho}_2\text{MnNiO}_6 + 0.05882 \text{ Mn}(\text{Ni}_3\text{O}_4)_2 + 0.1176 \text{ Li}_4\text{MnCo}_5\text{O}_{12} + 0.2059 \text{ Tb}_2\text{MnNiO}_6 + 0.1324 \text{ LiClO}_4 + \text{NiO} + 4.809 \text{ LiCl}$      | 71 |
|        | $\text{Li}_3\text{Ho}_{0.5}\text{Sm}_{0.5}\text{Cl}_6$ | $0.5435 \text{ Li}_5\text{MnCoNi}_3\text{O}_{10} + 0.4565 \text{ Li}_6\text{SmHoCl}_{12} \rightarrow 0.1087 \text{ Li}_4\text{MnCo}_5\text{O}_{12} + 0.2283 \text{ Ho}_2\text{MnNiO}_6 + 0.1223 \text{ LiClO}_4 + 0.2065 \text{ Mn}(\text{Ni}_3\text{O}_4)_2 + 0.163 \text{ NiO} + 0.4565 \text{ SmClO} + 4.899 \text{ LiCl}$             | 74 |
|        | $\text{Li}_3\text{Tb}_{0.5}\text{Tb}_{0.5}\text{Cl}_6$ | $0.4565 \text{ Li}_6\text{TbDyCl}_{12} + 0.5435 \text{ Li}_5\text{MnCoNi}_3\text{O}_{10} \rightarrow 0.2065 \text{ Mn}(\text{Ni}_3\text{O}_4)_2 + 0.2283 \text{ Tb}_2\text{MnNiO}_6 + 0.1087 \text{ Li}_4\text{MnCo}_5\text{O}_{12} + 0.1223 \text{ LiClO}_4 + 0.163 \text{ NiO} + 0.4565 \text{ DyClO} + 4.899 \text{ LiCl}$             | 68 |
|        | $\text{Li}_3\text{Tb}_{0.5}\text{Dy}_{0.5}\text{Cl}_6$ | $0.5007 \text{ Li}_5\text{MnCoNi}_3\text{O}_{10} + 0.4993 \text{ Li}_6\text{SmDyCl}_{12} \rightarrow 0.05302 \text{ Li}_2\text{Mn}_3\text{NiO}_8 + 0.1001 \text{ Li}_4\text{MnCo}_5\text{O}_{12} + 0.2415 \text{ Mn}(\text{Ni}_3\text{O}_4)_2 + 0.1127 \text{ LiClO}_4 + 0.4993 \text{ SmClO} + 0.4993 \text{ DyClO} + 4.88 \text{ LiCl}$ | 70 |
|        | $\text{Li}_3\text{Tb}_{0.5}\text{Sm}_{0.5}\text{Cl}_6$ | $0.5435 \text{ Li}_5\text{MnCoNi}_3\text{O}_{10} + 0.4565 \text{ Li}_6\text{TbSmCl}_{12} \rightarrow 0.2065 \text{ Mn}(\text{Ni}_3\text{O}_4)_2 + 0.1087 \text{ Li}_4\text{MnCo}_5\text{O}_{12} + 0.1223 \text{ LiClO}_4 + 0.163 \text{ NiO} + 0.2283 \text{ Tb}_2\text{MnNiO}_6 + 0.4565 \text{ SmClO} + 4.899 \text{ LiCl}$             | 68 |
| NMC811 | $\text{Li}_3\text{In}_{0.5}\text{Lu}_{0.5}\text{Cl}_6$ | $0.3947 \text{ Li}_{10}\text{MnCo}(\text{Ni}_2\text{O}_5)_4 + 0.6053 \text{ Li}_6\text{LuInCl}_{12} \rightarrow 0.07895 \text{ Li}_4\text{MnCo}_5\text{O}_{12} + 0.3355 \text{ LiClO}_4 + 0.1579 \text{ Lu}_2\text{Mn}_2\text{O}_7 +$                                                                                                     | 79 |

|                                                        |                                                                                                                                                                                                                                                                                                                                                     |    |
|--------------------------------------------------------|-----------------------------------------------------------------------------------------------------------------------------------------------------------------------------------------------------------------------------------------------------------------------------------------------------------------------------------------------------|----|
|                                                        | $6.928 \text{ LiCl} + 3.158 \text{ NiO} + 0.3026 \text{ In}_2\text{O}_3 + 0.1447 \text{ Lu}_2\text{O}_3$                                                                                                                                                                                                                                            |    |
| $\text{Li}_3\text{In}_{0.5}\text{Tm}_{0.5}\text{Cl}_6$ | $0.3947 \text{ Li}_{10}\text{MnCo}(\text{Ni}_2\text{O}_5)_4 + 0.6053 \text{ Li}_6\text{TmInCl}_{12} \rightarrow 0.1579 \text{ Tm}_2\text{Mn}_2\text{O}_7 + 0.07895 \text{ Li}_4\text{MnCo}_5\text{O}_{12} + 3.158 \text{ NiO} + 0.3355 \text{ LiClO}_4 + 6.928 \text{ LiCl} + 0.3026 \text{ In}_2\text{O}_3 + 0.1447 \text{ Tm}_2\text{O}_3$        | 73 |
| $\text{Li}_3\text{In}_{0.5}\text{Er}_{0.5}\text{Cl}_6$ | $0.3947 \text{ Li}_{10}\text{MnCo}(\text{Ni}_2\text{O}_5)_4 + 0.6053 \text{ Li}_6\text{ErInCl}_{12} \rightarrow 0.07895 \text{ Li}_4\text{MnCo}_5\text{O}_{12} + 0.1579 \text{ Er}_2\text{Mn}_2\text{O}_7 + 3.158 \text{ NiO} + 0.3355 \text{ LiClO}_4 + 6.928 \text{ LiCl} + 0.3026 \text{ In}_2\text{O}_3 + 0.1447 \text{ Er}_2\text{O}_3$        | 74 |
| $\text{Li}_3\text{In}_{0.5}\text{Ho}_{0.5}\text{Cl}_6$ | $0.6053 \text{ Li}_6\text{HoInCl}_{12} + 0.3947 \text{ Li}_{10}\text{MnCo}(\text{Ni}_2\text{O}_5)_4 \rightarrow 0.07895 \text{ Li}_4\text{MnCo}_5\text{O}_{12} + 0.01316 \text{ Mn}(\text{Ni}_3\text{O}_4)_2 + 0.3026 \text{ Ho}_2\text{MnNiO}_6 + 0.3355 \text{ LiClO}_4 + 2.776 \text{ NiO} + 6.928 \text{ LiCl} + 0.3026 \text{ In}_2\text{O}_3$ | 74 |
| $\text{Li}_3\text{Bi}_{0.5}\text{Sc}_{0.5}\text{Cl}_6$ | $0.3521 \text{ Li}_{10}\text{MnCo}(\text{Ni}_2\text{O}_5)_4 + 0.6479 \text{ Li}_6\text{ScBiCl}_{12} \rightarrow 0.2993 \text{ LiClO}_4 + 0.2817 \text{ Mn}(\text{Ni}_3\text{O}_4)_2 + 1.127 \text{ NiO} + 0.07042 \text{ Li}_4\text{MnCo}_5\text{O}_{12} + 6.827 \text{ LiCl} + 0.6479 \text{ BiClO} + 0.3239 \text{ Sc}_2\text{O}_3$               | 83 |
| $\text{Li}_3\text{Bi}_{0.5}\text{Lu}_{0.5}\text{Cl}_6$ | $0.3521 \text{ Li}_{10}\text{MnCo}(\text{Ni}_2\text{O}_5)_4 + 0.6479 \text{ Li}_6\text{LuBiCl}_{12} \rightarrow 0.07042 \text{ Li}_4\text{MnCo}_5\text{O}_{12} + 0.1408 \text{ Lu}_2\text{Mn}_2\text{O}_7 + 0.2993 \text{ LiClO}_4 + 2.817 \text{ NiO} + 6.827 \text{ LiCl} + 0.6479 \text{ BiClO} + 0.1831 \text{ Lu}_2\text{O}_3$                 | 85 |
| $\text{Li}_3\text{Bi}_{0.5}\text{Tm}_{0.5}\text{Cl}_6$ | $0.3521 \text{ Li}_{10}\text{MnCo}(\text{Ni}_2\text{O}_5)_4 + 0.6479 \text{ Li}_6\text{TmBiCl}_{12} \rightarrow 0.07042 \text{ Li}_4\text{MnCo}_5\text{O}_{12} + 0.1408 \text{ Tm}_2\text{Mn}_2\text{O}_7 + 0.2993 \text{ LiClO}_4 + 2.817 \text{ NiO} + 6.827 \text{ LiCl} + 0.6479 \text{ BiClO} + 0.1831 \text{ Tm}_2\text{O}_3$                 | 79 |
| $\text{Li}_3\text{Bi}_{0.5}\text{Er}_{0.5}\text{Cl}_6$ | $0.3741 \text{ Li}_{10}\text{MnCo}(\text{Ni}_2\text{O}_5)_4 + 0.6259 \text{ Li}_6\text{ErBiCl}_{12} \rightarrow 0.1497 \text{ Er}_2\text{Mn}_2\text{O}_7 + 0.07483 \text{ Li}_4\text{MnCo}_5\text{O}_{12} + 0.318 \text{ LiClO}_4 + 2.993 \text{ NiO} + 0.3129 \text{ ErBi}_2\text{ClO}_4 + 6.879 \text{ LiCl} + 0.006803 \text{ Er}_2\text{O}_3$   | 79 |
| $\text{Li}_3\text{Bi}_{0.5}\text{Y}_{0.5}\text{Cl}_6$  | $0.3571 \text{ Li}_{10}\text{MnCo}(\text{Ni}_2\text{O}_5)_4 + 0.6429 \text{ Li}_6\text{YBiCl}_{12} \rightarrow 0.3036 \text{ LiClO}_4 + 0.2857 \text{ Y}_2\text{MnNiO}_6 + 0.07143 \text{ YBi}_2\text{ClO}_4 + 0.07143 \text{ Li}_4\text{MnCo}_5\text{O}_{12} + 2.571 \text{ NiO} + 6.839 \text{ LiCl} + 0.5 \text{ BiClO}$                         | 69 |
| $\text{Li}_3\text{Bi}_{0.5}\text{Ho}_{0.5}\text{Cl}_6$ | $0.3571 \text{ Li}_{10}\text{MnCo}(\text{Ni}_2\text{O}_5)_4 + 0.6429 \text{ Li}_6\text{HoBiCl}_{12} \rightarrow 0.07143 \text{ HoBi}_2\text{ClO}_4 + 0.3036 \text{ LiClO}_4 + 0.2857 \text{ Ho}_2\text{MnNiO}_6 + 0.07143 \text{ Li}_4\text{MnCo}_5\text{O}_{12} + 2.571 \text{ NiO} + 6.839 \text{ LiCl} + 0.5 \text{ BiClO}$                      | 90 |
| $\text{Li}_3\text{Bi}_{0.5}\text{Dy}_{0.5}\text{Cl}_6$ | $0.6552 \text{ Li}_6\text{DyBiCl}_{12} + 0.3448 \text{ Li}_{10}\text{MnCo}(\text{Ni}_2\text{O}_5)_4 \rightarrow 0.06897 \text{ Li}_4\text{MnCo}_5\text{O}_{12} + 0.2759 \text{ Dy}_2\text{MnNiO}_6 + 0.2931 \text{ LiClO}_4 + 0.1034 \text{ DyClO} + 2.483 \text{ NiO} + 6.81 \text{ LiCl} + 0.6552 \text{ BiClO}$                                  | 75 |
| $\text{Li}_3\text{Bi}_{0.5}\text{Tb}_{0.5}\text{Cl}_6$ | $0.3571 \text{ Li}_{10}\text{MnCo}(\text{Ni}_2\text{O}_5)_4 + 0.6429 \text{ Li}_6\text{TbBiCl}_{12} \rightarrow 0.07143 \text{ Li}_4\text{MnCo}_5\text{O}_{12} + 0.3036 \text{ LiClO}_4 + 0.2857 \text{ Tb}_2\text{MnNiO}_6 + 2.571 \text{ NiO} + 0.07143 \text{ TbBi}_2\text{ClO}_4 + 6.839 \text{ LiCl} + 0.5 \text{ BiClO}$                      | 74 |
| $\text{Li}_3\text{Bi}_{0.5}\text{Sm}_{0.5}\text{Cl}_6$ | $0.303 \text{ Li}_{10}\text{MnCo}(\text{Ni}_2\text{O}_5)_4 + 0.697 \text{ Li}_6\text{SmBiCl}_{12} \rightarrow 0.06061 \text{ Li}_4\text{MnCo}_5\text{O}_{12} + 0.2424 \text{ Mn}(\text{Ni}_3\text{O}_4)_2 + 0.2576 \text{ LiClO}_4 + 0.9697 \text{ NiO} + 0.697 \text{ SmClO} + 0.697 \text{ BiClO} + 6.712 \text{ LiCl}$                           | 75 |
| $\text{Li}_3\text{Sc}_{0.5}\text{Lu}_{0.5}\text{Cl}_6$ | $0.3947 \text{ Li}_{10}\text{MnCo}(\text{Ni}_2\text{O}_5)_4 + 0.6053 \text{ Li}_6\text{LuScCl}_{12} \rightarrow 3.158 \text{ NiO} + 0.07895 \text{ Li}_4\text{MnCo}_5\text{O}_{12} + 0.3355 \text{ LiClO}_4 + 0.1579 \text{ Lu}_2\text{Mn}_2\text{O}_7 + 0.3026 \text{ Sc}_2\text{O}_3 + 6.928 \text{ LiCl} + 0.1447 \text{ Lu}_2\text{O}_3$        | 97 |
| $\text{Li}_3\text{Sc}_{0.5}\text{Tm}_{0.5}\text{Cl}_6$ | $0.3731 \text{ Li}_{10}\text{MnCo}(\text{Ni}_2\text{O}_5)_4 + 0.6269 \text{ Li}_6\text{TmScCl}_{12} \rightarrow 0.07463 \text{ Li}_4\text{MnCo}_5\text{O}_{12} + 0.1493 \text{ Tm}_2\text{Mn}_2\text{O}_7 + 0.3172 \text{ LiClO}_4 + 2.985 \text{ NiO} + 0.3134 \text{ Sc}_2\text{O}_3 + 0.3284 \text{ TmClO} + 6.877 \text{ LiCl}$                 | 93 |
| $\text{Li}_3\text{Sc}_{0.5}\text{Er}_{0.5}\text{Cl}_6$ | $0.6053 \text{ Li}_6\text{ErScCl}_{12} + 0.3947 \text{ Li}_{10}\text{MnCo}(\text{Ni}_2\text{O}_5)_4 \rightarrow 0.07895 \text{ Li}_4\text{MnCo}_5\text{O}_{12} + 0.3355 \text{ LiClO}_4 + 0.1579 \text{ Er}_2\text{Mn}_2\text{O}_7 + 0.3026 \text{ Sc}_2\text{O}_3 + 3.158 \text{ NiO} + 6.928 \text{ LiCl} + 0.1447 \text{ Er}_2\text{O}_3$        | 93 |
| $\text{Li}_3\text{Sc}_{0.5}\text{Y}_{0.5}\text{Cl}_6$  | $0.3521 \text{ Li}_{10}\text{MnCo}(\text{Ni}_2\text{O}_5)_4 + 0.6479 \text{ Li}_6\text{YScCl}_{12} \rightarrow 0.07042 \text{ Li}_4\text{MnCo}_5\text{O}_{12} + 0.2817 \text{ Mn}(\text{Ni}_3\text{O}_4)_2 + 0.2993 \text{ LiClO}_4 + 1.127 \text{ NiO} + 0.3239 \text{ Sc}_2\text{O}_3 + 0.6479 \text{ YClO} + 6.827 \text{ LiCl}$                 | 84 |



|                                                        |                                                                                                                                                                                                                                                                                                                                                           |    |
|--------------------------------------------------------|-----------------------------------------------------------------------------------------------------------------------------------------------------------------------------------------------------------------------------------------------------------------------------------------------------------------------------------------------------------|----|
| $\text{Li}_3\text{Sc}_{0.5}\text{Ho}_{0.5}\text{Cl}_6$ | $0.3947 \text{Li}_{10}\text{MnCo}(\text{Ni}_2\text{O}_5)_4 + 0.6053 \text{Li}_6\text{HoScCl}_{12} \rightarrow$<br>$0.01316 \text{Mn}(\text{Ni}_3\text{O}_4)_2 + 0.07895 \text{Li}_4\text{MnCo}_5\text{O}_{12} + 0.3026$<br>$\text{Ho}_2\text{MnNiO}_6 + 0.3355 \text{LiClO}_4 + 2.776 \text{NiO} + 0.3026 \text{Sc}_2\text{O}_3$<br>$+ 6.928 \text{LiCl}$ | 93 |
| $\text{Li}_3\text{Sc}_{0.5}\text{Dy}_{0.5}\text{Cl}_6$ | $0.3521 \text{Li}_{10}\text{MnCo}(\text{Ni}_2\text{O}_5)_4 + 0.6479 \text{Li}_6\text{DyScCl}_{12} \rightarrow 0.2817$<br>$\text{Mn}(\text{Ni}_3\text{O}_4)_2 + 0.2993 \text{LiClO}_4 + 0.07042 \text{Li}_4\text{MnCo}_5\text{O}_{12} +$<br>$0.3239 \text{Sc}_2\text{O}_3 + 1.127 \text{NiO} + 0.6479 \text{DyClO} + 6.827 \text{LiCl}$                    | 90 |
| $\text{Li}_3\text{Sc}_{0.5}\text{Tb}_{0.5}\text{Cl}_6$ | $0.3947 \text{Li}_{10}\text{MnCo}(\text{Ni}_2\text{O}_5)_4 + 0.6053 \text{Li}_6\text{TbScCl}_{12} \rightarrow$<br>$0.01316 \text{Mn}(\text{Ni}_3\text{O}_4)_2 + 2.776 \text{NiO} + 0.3026 \text{Tb}_2\text{MnNiO}_6 +$<br>$0.07895 \text{Li}_4\text{MnCo}_5\text{O}_{12} + 0.3355 \text{LiClO}_4 + 0.3026 \text{Sc}_2\text{O}_3 +$<br>$6.928 \text{LiCl}$ | 87 |
| $\text{Li}_3\text{Sc}_{0.5}\text{Sm}_{0.5}\text{Cl}_6$ | $0.3521 \text{Li}_{10}\text{MnCo}(\text{Ni}_2\text{O}_5)_4 + 0.6479 \text{Li}_6\text{SmScCl}_{12} \rightarrow 0.2817$<br>$\text{Mn}(\text{Ni}_3\text{O}_4)_2 + 0.07042 \text{Li}_4\text{MnCo}_5\text{O}_{12} + 0.2993 \text{LiClO}_4 +$<br>$0.6479 \text{SmClO} + 1.127 \text{NiO} + 6.827 \text{LiCl} + 0.3239 \text{Sc}_2\text{O}_3$                    | 90 |
| $\text{Li}_3\text{Lu}_{0.5}\text{Tm}_{0.5}\text{Cl}_6$ | $0.3521 \text{Li}_{10}\text{MnCo}(\text{Ni}_2\text{O}_5)_4 + 0.6479 \text{Li}_6\text{TmLuCl}_{12} \rightarrow$<br>$0.07042 \text{Li}_4\text{MnCo}_5\text{O}_{12} + 0.2993 \text{LiClO}_4 + 0.1408$<br>$\text{Lu}_2\text{Mn}_2\text{O}_7 + 2.817 \text{NiO} + 0.6479 \text{TmClO} + 6.827 \text{LiCl} +$<br>$0.1831 \text{Lu}_2\text{O}_3$                 | 95 |
| $\text{Li}_3\text{Lu}_{0.5}\text{Er}_{0.5}\text{Cl}_6$ | $0.3947 \text{Li}_{10}\text{MnCo}(\text{Ni}_2\text{O}_5)_4 + 0.6053 \text{Li}_6\text{ErLuCl}_{12} \rightarrow 0.07895$<br>$\text{Li}_4\text{MnCo}_5\text{O}_{12} + 0.3355 \text{LiClO}_4 + 0.1579 \text{Er}_2\text{Mn}_2\text{O}_7 + 3.158$<br>$\text{NiO} + 0.1447 \text{Er}_2\text{O}_3 + 6.928 \text{LiCl} + 0.3026 \text{Lu}_2\text{O}_3$             | 94 |
| $\text{Li}_3\text{Lu}_{0.5}\text{Y}_{0.5}\text{Cl}_6$  | $0.3521 \text{Li}_{10}\text{MnCo}(\text{Ni}_2\text{O}_5)_4 + 0.6479 \text{Li}_6\text{YLuCl}_{12} \rightarrow 0.1408$<br>$\text{Lu}_2\text{Mn}_2\text{O}_7 + 0.07042 \text{Li}_4\text{MnCo}_5\text{O}_{12} + 0.2993 \text{LiClO}_4 +$<br>$0.6479 \text{YClO} + 2.817 \text{NiO} + 6.827 \text{LiCl} + 0.1831 \text{Lu}_2\text{O}_3$                        | 86 |
| $\text{Li}_3\text{Lu}_{0.5}\text{Ho}_{0.5}\text{Cl}_6$ | $0.6053 \text{Li}_6\text{HoLuCl}_{12} + 0.3947 \text{Li}_{10}\text{MnCo}(\text{Ni}_2\text{O}_5)_4 \rightarrow$<br>$0.006579 \text{Lu}_2\text{Mn}_2\text{O}_7 + 0.3026 \text{Ho}_2\text{MnNiO}_6 + 0.07895$<br>$\text{Li}_4\text{MnCo}_5\text{O}_{12} + 0.3355 \text{LiClO}_4 + 2.855 \text{NiO} + 6.928 \text{LiCl}$<br>$+ 0.2961 \text{Lu}_2\text{O}_3$  | 95 |
| $\text{Li}_3\text{Lu}_{0.5}\text{Dy}_{0.5}\text{Cl}_6$ | $0.3521 \text{Li}_{10}\text{MnCo}(\text{Ni}_2\text{O}_5)_4 + 0.6479 \text{Li}_6\text{DyLuCl}_{12} \rightarrow 2.817$<br>$\text{NiO} + 0.07042 \text{Li}_4\text{MnCo}_5\text{O}_{12} + 0.1408 \text{Lu}_2\text{Mn}_2\text{O}_7 + 0.6479$<br>$\text{DyClO} + 0.2993 \text{LiClO}_4 + 6.827 \text{LiCl} + 0.1831 \text{Lu}_2\text{O}_3$                      | 92 |
| $\text{Li}_3\text{Lu}_{0.5}\text{Tb}_{0.5}\text{Cl}_6$ | $0.3947 \text{Li}_{10}\text{MnCo}(\text{Ni}_2\text{O}_5)_4 + 0.6053 \text{Li}_6\text{TbLuCl}_{12} \rightarrow 0.3026$<br>$\text{Tb}_2\text{MnNiO}_6 + 0.07895 \text{Li}_4\text{MnCo}_5\text{O}_{12} + 0.3355 \text{LiClO}_4 +$<br>$0.006579 \text{Lu}_2\text{Mn}_2\text{O}_7 + 2.855 \text{NiO} + 6.928 \text{LiCl} + 0.2961$<br>$\text{Lu}_2\text{O}_3$  | 89 |
| $\text{Li}_3\text{Lu}_{0.5}\text{Sm}_{0.5}\text{Cl}_6$ | $0.3521 \text{Li}_{10}\text{MnCo}(\text{Ni}_2\text{O}_5)_4 + 0.6479 \text{Li}_6\text{SmLuCl}_{12} \rightarrow$<br>$0.1408 \text{Lu}_2\text{Mn}_2\text{O}_7 + 0.07042 \text{Li}_4\text{MnCo}_5\text{O}_{12} + 0.2993$<br>$\text{LiClO}_4 + 0.6479 \text{SmClO} + 2.817 \text{NiO} + 6.827 \text{LiCl} +$<br>$0.1831 \text{Lu}_2\text{O}_3$                 | 92 |
| $\text{Li}_3\text{Tm}_{0.5}\text{Er}_{0.5}\text{Cl}_6$ | $0.6479 \text{Li}_6\text{ErTmCl}_{12} + 0.3521 \text{Li}_{10}\text{MnCo}(\text{Ni}_2\text{O}_5)_4 \rightarrow$<br>$0.07042 \text{Li}_4\text{MnCo}_5\text{O}_{12} + 0.1408 \text{Er}_2\text{Mn}_2\text{O}_7 + 2.817 \text{NiO} +$<br>$0.2993 \text{LiClO}_4 + 0.1831 \text{Er}_2\text{O}_3 + 0.6479 \text{TmClO} + 6.827$<br>$\text{LiCl}$                 | 89 |
| $\text{Li}_3\text{Tm}_{0.5}\text{Y}_{0.5}\text{Cl}_6$  | $0.6479 \text{Li}_6\text{YTmCl}_{12} + 0.3521 \text{Li}_{10}\text{MnCo}(\text{Ni}_2\text{O}_5)_4 \rightarrow 0.2993$<br>$\text{LiClO}_4 + 0.1408 \text{Tm}_2\text{Mn}_2\text{O}_7 + 0.07042 \text{Li}_4\text{MnCo}_5\text{O}_{12} +$<br>$2.817 \text{NiO} + 0.6479 \text{YClO} + 6.827 \text{LiCl} + 0.1831 \text{Tm}_2\text{O}_3$                        | 79 |
| $\text{Li}_3\text{Tm}_{0.5}\text{Ho}_{0.5}\text{Cl}_6$ | $0.3521 \text{Li}_{10}\text{MnCo}(\text{Ni}_2\text{O}_5)_4 + 0.6479 \text{Li}_6\text{HoTmCl}_{12} \rightarrow$<br>$0.2817 \text{Ho}_2\text{MnNiO}_6 + 0.07042 \text{Li}_4\text{MnCo}_5\text{O}_{12} + 0.2993$<br>$\text{LiClO}_4 + 2.535 \text{NiO} + 0.6479 \text{TmClO} + 0.04225 \text{Ho}_2\text{O}_3 +$<br>$6.827 \text{LiCl}$                       | 90 |
| $\text{Li}_3\text{Tm}_{0.5}\text{Dy}_{0.5}\text{Cl}_6$ | $0.3226 \text{Li}_{10}\text{MnCo}(\text{Ni}_2\text{O}_5)_4 + 0.6774 \text{Li}_6\text{DyTmCl}_{12} \rightarrow 0.129$<br>$\text{Tm}_2\text{Mn}_2\text{O}_7 + 0.06452 \text{Li}_4\text{MnCo}_5\text{O}_{12} + 2.581 \text{NiO} + 0.6774$<br>$\text{DyClO} + 0.2742 \text{LiClO}_4 + 0.4194 \text{TmClO} + 6.758 \text{LiCl}$                                | 86 |
| $\text{Li}_3\text{Tm}_{0.5}\text{Tb}_{0.5}\text{Cl}_6$ | $0.3846 \text{Li}_{10}\text{MnCo}(\text{Ni}_2\text{O}_5)_4 + 0.6154 \text{Li}_6\text{TbTmCl}_{12} \rightarrow$<br>$0.3077 \text{Tb}_2\text{MnNiO}_6 + 0.07692 \text{Li}_4\text{MnCo}_5\text{O}_{12} + 0.3269$                                                                                                                                             | 83 |

---

|                                                                     |                                                                                                                                                                                                                                                                                                                                                                                                  |    |
|---------------------------------------------------------------------|--------------------------------------------------------------------------------------------------------------------------------------------------------------------------------------------------------------------------------------------------------------------------------------------------------------------------------------------------------------------------------------------------|----|
|                                                                     | LiClO <sub>4</sub> + 2.769 NiO + 0.1538 TmClO + 6.904 LiCl +<br>0.2308 Tm <sub>2</sub> O <sub>3</sub>                                                                                                                                                                                                                                                                                            |    |
| Li <sub>3</sub> Tm <sub>0.5</sub> Sm <sub>0.5</sub> Cl <sub>6</sub> | 0.3226 Li <sub>10</sub> MnCo(Ni <sub>2</sub> O <sub>5</sub> ) <sub>4</sub> + 0.6774 Li <sub>6</sub> SmTmCl <sub>12</sub> →<br>0.06452 Li <sub>4</sub> MnCo <sub>5</sub> O <sub>12</sub> + 0.2742 LiClO <sub>4</sub> + 0.129<br>Tm <sub>2</sub> Mn <sub>2</sub> O <sub>7</sub> + 2.581 NiO + 0.6774 SmClO + 0.4194<br>TmClO + 6.758 LiCl                                                          | 86 |
| Li <sub>3</sub> Er <sub>0.5</sub> Y <sub>0.5</sub> Cl <sub>6</sub>  | 0.3521 Li <sub>10</sub> MnCo(Ni <sub>2</sub> O <sub>5</sub> ) <sub>4</sub> + 0.6479 Li <sub>6</sub> YErCl <sub>12</sub> → 0.07042<br>Li <sub>4</sub> MnCo <sub>5</sub> O <sub>12</sub> + 0.1408 Er <sub>2</sub> Mn <sub>2</sub> O <sub>7</sub> + 0.6479 YClO + 0.2993<br>LiClO <sub>4</sub> + 2.817 NiO + 6.827 LiCl + 0.1831 Er <sub>2</sub> O <sub>3</sub>                                     | 81 |
| Li <sub>3</sub> Er <sub>0.5</sub> Ho <sub>0.5</sub> Cl <sub>6</sub> | 0.3947 Li <sub>10</sub> MnCo(Ni <sub>2</sub> O <sub>5</sub> ) <sub>4</sub> + 0.6053 Li <sub>6</sub> HoErCl <sub>12</sub> →<br>0.006579 Er <sub>2</sub> Mn <sub>2</sub> O <sub>7</sub> + 0.07895 Li <sub>4</sub> MnCo <sub>5</sub> O <sub>12</sub> + 0.3026<br>Ho <sub>2</sub> MnNiO <sub>6</sub> + 0.3355 LiClO <sub>4</sub> + 2.855 NiO + 6.928 LiCl +<br>0.2961 Er <sub>2</sub> O <sub>3</sub> | 89 |
| Li <sub>3</sub> Er <sub>0.5</sub> Dy <sub>0.5</sub> Cl <sub>6</sub> | 0.3521 Li <sub>10</sub> MnCo(Ni <sub>2</sub> O <sub>5</sub> ) <sub>4</sub> + 0.6479 Li <sub>6</sub> DyErCl <sub>12</sub> → 0.1408<br>Er <sub>2</sub> Mn <sub>2</sub> O <sub>7</sub> + 2.817 NiO + 0.07042 Li <sub>4</sub> MnCo <sub>5</sub> O <sub>12</sub> + 0.2993<br>LiClO <sub>4</sub> + 0.6479 DyClO + 6.827 LiCl + 0.1831 Er <sub>2</sub> O <sub>3</sub>                                   | 86 |
| Li <sub>3</sub> Er <sub>0.5</sub> Tb <sub>0.5</sub> Cl <sub>6</sub> | 0.3947 Li <sub>10</sub> MnCo(Ni <sub>2</sub> O <sub>5</sub> ) <sub>4</sub> + 0.6053 Li <sub>6</sub> TbErCl <sub>12</sub> → 0.07895<br>Li <sub>4</sub> MnCo <sub>5</sub> O <sub>12</sub> + 0.3026 Tb <sub>2</sub> MnNiO <sub>6</sub> + 0.006579 Er <sub>2</sub> Mn <sub>2</sub> O <sub>7</sub><br>+ 0.3355 LiClO <sub>4</sub> + 2.855 NiO + 6.928 LiCl + 0.2961 Er <sub>2</sub> O <sub>3</sub>    | 84 |
| Li <sub>3</sub> Er <sub>0.5</sub> Sm <sub>0.5</sub> Cl <sub>6</sub> | 0.6479 Li <sub>6</sub> SmErCl <sub>12</sub> + 0.3521 Li <sub>10</sub> MnCo(Ni <sub>2</sub> O <sub>5</sub> ) <sub>4</sub> →<br>0.07042 Li <sub>4</sub> MnCo <sub>5</sub> O <sub>12</sub> + 0.1408 Er <sub>2</sub> Mn <sub>2</sub> O <sub>7</sub> + 0.2993<br>LiClO <sub>4</sub> + 2.817 NiO + 0.6479 SmClO + 6.827 LiCl +<br>0.1831 Er <sub>2</sub> O <sub>3</sub>                                | 87 |
| Li <sub>3</sub> Y <sub>0.5</sub> Ho <sub>0.5</sub> Cl <sub>6</sub>  | 0.3521 Li <sub>10</sub> MnCo(Ni <sub>2</sub> O <sub>5</sub> ) <sub>4</sub> + 0.6479 Li <sub>6</sub> YHoCl <sub>12</sub> → 0.07042<br>Li <sub>4</sub> MnCo <sub>5</sub> O <sub>12</sub> + 0.2817 Ho <sub>2</sub> MnNiO <sub>6</sub> + 0.2993 LiClO <sub>4</sub> +<br>0.6479 YClO + 2.535 NiO + 6.827 LiCl + 0.04225 Ho <sub>2</sub> O <sub>3</sub>                                                | 82 |
| Li <sub>3</sub> Y <sub>0.5</sub> Dy <sub>0.5</sub> Cl <sub>6</sub>  | 0.3448 Li <sub>10</sub> MnCo(Ni <sub>2</sub> O <sub>5</sub> ) <sub>4</sub> + 0.6552 Li <sub>6</sub> DyYCl <sub>12</sub> → 0.2931<br>LiClO <sub>4</sub> + 0.2759 Dy <sub>2</sub> MnNiO <sub>6</sub> + 0.06897 Li <sub>4</sub> MnCo <sub>5</sub> O <sub>12</sub> +<br>2.483 NiO + 0.6552 YClO + 0.1034 DyClO + 6.81 LiCl                                                                           | 77 |
| Li <sub>3</sub> Y <sub>0.5</sub> Tb <sub>0.5</sub> Cl <sub>6</sub>  | 0.3521 Li <sub>10</sub> MnCo(Ni <sub>2</sub> O <sub>5</sub> ) <sub>4</sub> + 0.6479 Li <sub>6</sub> TbYCl <sub>12</sub> → 0.07042<br>Li <sub>4</sub> MnCo <sub>5</sub> O <sub>12</sub> + 0.2817 Tb <sub>2</sub> MnNiO <sub>6</sub> + 0.2993 LiClO <sub>4</sub> +<br>2.535 NiO + 0.6479 YClO + 6.827 LiCl + 0.04225 Tb <sub>2</sub> O <sub>3</sub>                                                | 75 |
| Li <sub>3</sub> Y <sub>0.5</sub> Sm <sub>0.5</sub> Cl <sub>6</sub>  | 0.6552 Li <sub>6</sub> SmYCl <sub>12</sub> + 0.3448 Li <sub>10</sub> MnCo(Ni <sub>2</sub> O <sub>5</sub> ) <sub>4</sub> → 0.2759<br>Y <sub>2</sub> MnNiO <sub>6</sub> + 0.2931 LiClO <sub>4</sub> + 0.06897 Li <sub>4</sub> MnCo <sub>5</sub> O <sub>12</sub> +<br>2.483 NiO + 0.6552 SmClO + 0.1034 YClO + 6.81 LiCl                                                                            | 77 |
| Li <sub>3</sub> Ho <sub>0.5</sub> Dy <sub>0.5</sub> Cl <sub>6</sub> | 0.3521 Li <sub>10</sub> MnCo(Ni <sub>2</sub> O <sub>5</sub> ) <sub>4</sub> + 0.6479 Li <sub>6</sub> DyHoCl <sub>12</sub> →<br>0.07042 Li <sub>4</sub> MnCo <sub>5</sub> O <sub>12</sub> + 2.535 NiO + 0.2817 Ho <sub>2</sub> MnNiO <sub>6</sub><br>+ 0.2993 LiClO <sub>4</sub> + 0.6479 DyClO + 6.827 LiCl + 0.04225<br>Ho <sub>2</sub> O <sub>3</sub>                                           | 87 |
| Li <sub>3</sub> Ho <sub>0.5</sub> Tb <sub>0.5</sub> Cl <sub>6</sub> | 0.3947 Li <sub>10</sub> MnCo(Ni <sub>2</sub> O <sub>5</sub> ) <sub>4</sub> + 0.6053 Li <sub>6</sub> TbHoCl <sub>12</sub> →<br>0.01316 Ho <sub>2</sub> MnNiO <sub>6</sub> + 0.07895 Li <sub>4</sub> MnCo <sub>5</sub> O <sub>12</sub> + 0.3026<br>Tb <sub>2</sub> MnNiO <sub>6</sub> + 0.3355 LiClO <sub>4</sub> + 2.842 NiO + 6.928 LiCl +<br>0.2895 Ho <sub>2</sub> O <sub>3</sub>              | 83 |
| Li <sub>3</sub> Ho <sub>0.5</sub> Sm <sub>0.5</sub> Cl <sub>6</sub> | 0.3521 Li <sub>10</sub> MnCo(Ni <sub>2</sub> O <sub>5</sub> ) <sub>4</sub> + 0.6479 Li <sub>6</sub> SmHoCl <sub>12</sub> →<br>0.07042 Li <sub>4</sub> MnCo <sub>5</sub> O <sub>12</sub> + 0.2817 Ho <sub>2</sub> MnNiO <sub>6</sub> + 0.2993<br>LiClO <sub>4</sub> + 2.535 NiO + 0.6479 SmClO + 6.827 LiCl +<br>0.04225 Ho <sub>2</sub> O <sub>3</sub>                                           | 87 |
| Li <sub>3</sub> Tb <sub>0.5</sub> Tb <sub>0.5</sub> Cl <sub>6</sub> | 0.6479 Li <sub>6</sub> TbDyCl <sub>12</sub> + 0.3521 Li <sub>10</sub> MnCo(Ni <sub>2</sub> O <sub>5</sub> ) <sub>4</sub> → 0.2817<br>Tb <sub>2</sub> MnNiO <sub>6</sub> + 0.07042 Li <sub>4</sub> MnCo <sub>5</sub> O <sub>12</sub> + 0.2993 LiClO <sub>4</sub> +<br>2.535 NiO + 0.6479 DyClO + 0.04225 Tb <sub>2</sub> O <sub>3</sub> + 6.827 LiCl                                              | 80 |
| Li <sub>3</sub> Tb <sub>0.5</sub> Dy <sub>0.5</sub> Cl <sub>6</sub> | 0.3448 Li <sub>10</sub> MnCo(Ni <sub>2</sub> O <sub>5</sub> ) <sub>4</sub> + 0.6552 Li <sub>6</sub> SmDyCl <sub>12</sub> →<br>0.06897 Li <sub>4</sub> MnCo <sub>5</sub> O <sub>12</sub> + 0.2931 LiClO <sub>4</sub> + 0.2759<br>Dy <sub>2</sub> MnNiO <sub>6</sub> + 2.483 NiO + 0.6552 SmClO + 0.1034<br>DyClO + 6.81 LiCl                                                                      | 83 |
| Li <sub>3</sub> Tb <sub>0.5</sub> Sm <sub>0.5</sub> Cl <sub>6</sub> | 0.3521 Li <sub>10</sub> MnCo(Ni <sub>2</sub> O <sub>5</sub> ) <sub>4</sub> + 0.6479 Li <sub>6</sub> TbSmCl <sub>12</sub> →                                                                                                                                                                                                                                                                       | 81 |

---

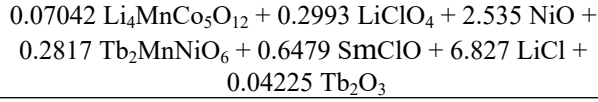

**Table S7.** Energy chemical reactions between  $\text{Li}_3\text{MX}_6$  or  $\text{Li}_3\text{M}_{0.5}\text{Zr}_{0.5}\text{Cl}_6$  or  $\text{Li}_3\text{MBr}_3\text{Cl}_3$  and eight cathode materials ( $\text{LiFePO}_4$  (LFP),  $\text{LiMn}_2\text{O}_4$  (LMO),  $\text{Li}(\text{NiMnCo})_{1/3}\text{O}_2$  (NCM), and  $\text{LiCoO}_2$  (LCO), NMC532, NMC622, NMC811).

|                                                            | LFP | LCO | LMO | NMC111 | NMC532 | NMC622 | NMC811 | LNO |
|------------------------------------------------------------|-----|-----|-----|--------|--------|--------|--------|-----|
| $\text{Li}_3\text{PS}_4$                                   | 131 | 413 | 348 | 399    | 396    | 432    | 477    | 525 |
| $\text{Li}_{10}\text{GeP}_2\text{S}_{12}$                  | 143 | 349 | 281 | 333    | 330    | 366    | 414    | 470 |
| $\text{Li}_6\text{PS}_5\text{Cl}$                          | 175 | 369 | 317 | 357    | 355    | 382    | 419    | 465 |
| $\text{Li}_7\text{La}_3\text{Zr}_2\text{O}_{12}$           | 88  | 0   | 110 | 112    | 67     | 67     | 42     | 0   |
| $\text{LiGaO}_2$                                           | 6   | 0   | 0   | 49     | 0      | 0      | 0      | 0   |
| $\text{Li}_2\text{La}_2\text{Ti}_3\text{O}_{10}$           | 32  | 20  | 80  | 127    | 83     | 85     | 54     | 20  |
| $\text{Li}_3\text{InCl}_6$                                 | 0   | 14  | 0   | 63     | 36     | 45     | 58     | 71  |
| $\text{Li}_3\text{BiCl}_6$                                 | 0   | 30  | 1   | 70     | 47     | 55     | 67     | 78  |
| $\text{Li}_3\text{ScCl}_6$                                 | 29  | 54  | 18  | 97     | 73     | 84     | 101    | 116 |
| $\text{Li}_3\text{LuCl}_6$                                 | 52  | 52  | 28  | 100    | 76     | 84     | 99     | 114 |
| $\text{Li}_3\text{TmCl}_6$                                 | 44  | 50  | 20  | 91     | 68     | 76     | 89     | 101 |
| $\text{Li}_3\text{ErCl}_6$                                 | 47  | 48  | 27  | 90     | 66     | 74     | 88     | 102 |
| $\text{Li}_3\text{YCl}_6$                                  | 29  | 33  | 14  | 75     | 51     | 59     | 71     | 82  |
| $\text{Li}_3\text{HoCl}_6$                                 | 47  | 46  | 27  | 92     | 67     | 76     | 89     | 101 |
| $\text{Li}_3\text{DyCl}_6$                                 | 39  | 45  | 22  | 84     | 61     | 70     | 82     | 94  |
| $\text{Li}_3\text{TbCl}_6$                                 | 36  | 30  | 20  | 81     | 54     | 63     | 75     | 86  |
| $\text{Li}_3\text{SmCl}_6$                                 | 39  | 45  | 13  | 83     | 62     | 71     | 83     | 95  |
| $\text{Li}_2\text{ZrCl}_6$                                 | 41  | 65  | 36  | 124    | 111    | 125    | 143    | 157 |
| $\text{Li}_{2.5}\text{In}_{0.5}\text{Zr}_{0.5}\text{Cl}_6$ | 31  | 48  | 27  | 91     | 74     | 84     | 99     | 115 |
| $\text{Li}_{2.5}\text{Sc}_{0.5}\text{Zr}_{0.5}\text{Cl}_6$ | 33  | 49  | 27  | 104    | 89     | 100    | 116    | 134 |
| $\text{Li}_{2.5}\text{Y}_{0.5}\text{Zr}_{0.5}\text{Cl}_6$  | 35  | 48  | 27  | 100    | 81     | 91     | 108    | 124 |
| $\text{Li}_{2.5}\text{Er}_{0.5}\text{Zr}_{0.5}\text{Cl}_6$ | 43  | 54  | 33  | 107    | 93     | 100    | 115    | 133 |
| $\text{Li}_3\text{InCl}_3\text{Br}_3$                      | 0   | 0   | 0   | 49     | 17     | 26     | 37     | 47  |
| $\text{Li}_3\text{ScCl}_3\text{Br}_3$                      | 24  | 41  | 33  | 94     | 82     | 91     | 103    | 112 |
| $\text{Li}_3\text{LuCl}_3\text{Br}_3$                      | 57  | 49  | 47  | 100    | 89     | 96     | 106    | 115 |
| $\text{Li}_3\text{TmCl}_3\text{Br}_3$                      | 48  | 45  | 40  | 89     | 79     | 85     | 92     | 101 |
| $\text{Li}_3\text{ErCl}_3\text{Br}_3$                      | 48  | 43  | 41  | 88     | 77     | 83     | 90     | 100 |
| $\text{Li}_3\text{YCl}_3\text{Br}_3$                       | 25  | 19  | 21  | 68     | 48     | 54     | 66     | 76  |
| $\text{Li}_3\text{HoCl}_3\text{Br}_3$                      | 47  | 43  | 41  | 87     | 76     | 82     | 90     | 99  |
| $\text{Li}_3\text{DyCl}_3\text{Br}_3$                      | 40  | 37  | 36  | 81     | 69     | 75     | 83     | 94  |
| $\text{Li}_3\text{TbCl}_3\text{Br}_3$                      | 36  | 16  | 33  | 78     | 61     | 66     | 76     | 86  |

|                                   |    |     |     |     |     |     |     |     |
|-----------------------------------|----|-----|-----|-----|-----|-----|-----|-----|
| Li <sub>3</sub> InBr <sub>6</sub> | 0  | 0   | 0   | 53  | 22  | 27  | 34  | 41  |
| Li <sub>3</sub> BiBr <sub>6</sub> | 0  | 0   | 0   | 42  | 21  | 14  | 18  | 22  |
| Li <sub>3</sub> ScBr <sub>6</sub> | 9  | 73  | 63  | 119 | 104 | 104 | 115 | 124 |
| Li <sub>3</sub> LuBr <sub>6</sub> | 22 | 61  | 63  | 111 | 98  | 94  | 103 | 110 |
| Li <sub>3</sub> TmBr <sub>6</sub> | 21 | 60  | 58  | 106 | 91  | 94  | 93  | 99  |
| Li <sub>3</sub> ErBr <sub>6</sub> | 19 | 58  | 53  | 100 | 82  | 77  | 83  | 87  |
| Li <sub>3</sub> YBr <sub>6</sub>  | 13 | 49  | 45  | 90  | 73  | 68  | 74  | 81  |
| Li <sub>3</sub> HoBr <sub>6</sub> | 18 | 58  | 52  | 98  | 84  | 81  | 87  | 92  |
| Li <sub>3</sub> DyBr <sub>6</sub> | 18 | 40  | 51  | 95  | 78  | 69  | 74  | 81  |
| Li <sub>3</sub> TbBr <sub>6</sub> | 17 | 36  | 50  | 92  | 76  | 66  | 71  | 78  |
| Li <sub>3</sub> ScI <sub>6</sub>  | 14 | 134 | 134 | 169 | 193 | 155 | 177 | 198 |
| Li <sub>3</sub> LuI <sub>6</sub>  | 43 | 128 | 129 | 164 | 192 | 150 | 171 | 192 |
| Li <sub>3</sub> TmI <sub>6</sub>  | 40 | 119 | 122 | 155 | 190 | 137 | 157 | 179 |
| Li <sub>3</sub> ErI <sub>6</sub>  | 36 | 111 | 116 | 147 | 188 | 129 | 125 | 174 |
| Li <sub>3</sub> HoI <sub>6</sub>  | 33 | 109 | 109 | 139 | 187 | 120 | 142 | 170 |
| Li <sub>3</sub> DyI <sub>6</sub>  | 31 | 101 | 108 | 137 | 186 | 114 | 136 | 167 |
| Li <sub>3</sub> TbI <sub>6</sub>  | 28 | 96  | 129 | 129 | 185 | 107 | 130 | 164 |
| Li <sub>3</sub> SmI <sub>6</sub>  | 17 | 97  | 121 | 121 | 87  | 98  | 118 | 153 |

**Table S8.** Energy Chemical reactions between Li<sub>3</sub>M<sub>0.5</sub>M'<sub>0.5</sub>Cl<sub>6</sub> and cathode materials (LiFePO<sub>4</sub> (LFP), LiMn<sub>2</sub>O<sub>4</sub> (LMO), Li(NiMnCo)<sub>1/3</sub>O<sub>2</sub> (NCM), and LiCoO<sub>2</sub> (LCO), NMC532, NMC622, NMC811).

|                                                                     | LFP | LCO | LMO | NMC111 | NMC532 | NMC622 | NMC811 | LNO |
|---------------------------------------------------------------------|-----|-----|-----|--------|--------|--------|--------|-----|
| Li <sub>3</sub> Tb <sub>0.5</sub> Sm <sub>0.5</sub> Cl <sub>6</sub> | 38  | 25  | 23  | 79     | 59     | 68     | 81     | 90  |
| Li <sub>3</sub> Tb <sub>0.5</sub> Dy <sub>0.5</sub> Cl <sub>6</sub> | 39  | 35  | 24  | 81     | 61     | 70     | 83     | 95  |
| Li <sub>3</sub> Tb <sub>0.5</sub> Tb <sub>0.5</sub> Cl <sub>6</sub> | 38  | 25  | 23  | 79     | 58     | 68     | 80     | 89  |
| Li <sub>3</sub> Ho <sub>0.5</sub> Sm <sub>0.5</sub> Cl <sub>6</sub> | 43  | 36  | 27  | 85     | 65     | 74     | 87     | 98  |
| Li <sub>3</sub> Ho <sub>0.5</sub> Tb <sub>0.5</sub> Cl <sub>6</sub> | 41  | 25  | 26  | 83     | 62     | 71     | 83     | 93  |
| Li <sub>3</sub> Ho <sub>0.5</sub> Dy <sub>0.5</sub> Cl <sub>6</sub> | 43  | 36  | 27  | 84     | 65     | 74     | 87     | 98  |
| Li <sub>3</sub> Y <sub>0.5</sub> Sm <sub>0.5</sub> Cl <sub>6</sub>  | 34  | 29  | 20  | 76     | 56     | 65     | 77     | 88  |
| Li <sub>3</sub> Y <sub>0.5</sub> Tb <sub>0.5</sub> Cl <sub>6</sub>  | 32  | 20  | 19  | 74     | 53     | 63     | 75     | 84  |
| Li <sub>3</sub> Y <sub>0.5</sub> Dy <sub>0.5</sub> Cl <sub>6</sub>  | 34  | 29  | 20  | 76     | 56     | 64     | 77     | 88  |
| Li <sub>3</sub> Y <sub>0.5</sub> Ho <sub>0.5</sub> Cl <sub>6</sub>  | 38  | 30  | 23  | 80     | 60     | 69     | 82     | 92  |
| Li <sub>3</sub> Er <sub>0.5</sub> Sm <sub>0.5</sub> Cl <sub>6</sub> | 43  | 37  | 27  | 85     | 66     | 74     | 87     | 99  |
| Li <sub>3</sub> Er <sub>0.5</sub> Tb <sub>0.5</sub> Cl <sub>6</sub> | 42  | 26  | 26  | 83     | 62     | 70     | 84     | 94  |
| Li <sub>3</sub> Er <sub>0.5</sub> Dy <sub>0.5</sub> Cl <sub>6</sub> | 43  | 36  | 27  | 85     | 66     | 74     | 86     | 99  |
| Li <sub>3</sub> Er <sub>0.5</sub> Ho <sub>0.5</sub> Cl <sub>6</sub> | 47  | 37  | 30  | 88     | 68     | 76     | 89     | 102 |

|                                                        |    |    |    |    |    |    |    |     |
|--------------------------------------------------------|----|----|----|----|----|----|----|-----|
| $\text{Li}_3\text{Er}_{0.5}\text{Y}_{0.5}\text{Cl}_6$  | 38 | 31 | 23 | 80 | 61 | 69 | 81 | 93  |
| $\text{Li}_3\text{Tm}_{0.5}\text{Sm}_{0.5}\text{Cl}_6$ | 42 | 38 | 26 | 84 | 65 | 74 | 86 | 98  |
| $\text{Li}_3\text{Tm}_{0.5}\text{Tb}_{0.5}\text{Cl}_6$ | 40 | 27 | 25 | 82 | 62 | 70 | 83 | 94  |
| $\text{Li}_3\text{Tm}_{0.5}\text{Dy}_{0.5}\text{Cl}_6$ | 42 | 38 | 26 | 84 | 65 | 73 | 86 | 98  |
| $\text{Li}_3\text{Tm}_{0.5}\text{Ho}_{0.5}\text{Cl}_6$ | 46 | 38 | 29 | 87 | 68 | 76 | 90 | 101 |
| $\text{Li}_3\text{Tm}_{0.5}\text{Y}_{0.5}\text{Cl}_6$  | 37 | 32 | 21 | 79 | 60 | 68 | 79 | 92  |
| $\text{Li}_3\text{Tm}_{0.5}\text{Er}_{0.5}\text{Cl}_6$ | 46 | 39 | 29 | 87 | 69 | 77 | 89 | 102 |
| $\text{Li}_3\text{Lu}_{0.5}\text{Sm}_{0.5}\text{Cl}_6$ | 45 | 38 | 29 | 89 | 71 | 79 | 92 | 105 |
| $\text{Li}_3\text{Lu}_{0.5}\text{Tb}_{0.5}\text{Cl}_6$ | 44 | 29 | 28 | 87 | 67 | 75 | 89 | 100 |
| $\text{Li}_3\text{Lu}_{0.5}\text{Dy}_{0.5}\text{Cl}_6$ | 46 | 38 | 29 | 89 | 71 | 79 | 92 | 105 |
| $\text{Li}_3\text{Lu}_{0.5}\text{Ho}_{0.5}\text{Cl}_6$ | 49 | 38 | 32 | 92 | 72 | 80 | 95 | 107 |
| $\text{Li}_3\text{Lu}_{0.5}\text{Y}_{0.5}\text{Cl}_6$  | 40 | 33 | 24 | 84 | 65 | 74 | 86 | 99  |
| $\text{Li}_3\text{Lu}_{0.5}\text{Er}_{0.5}\text{Cl}_6$ | 49 | 39 | 32 | 92 | 72 | 80 | 94 | 108 |
| $\text{Li}_3\text{Lu}_{0.5}\text{Tm}_{0.5}\text{Cl}_6$ | 48 | 40 | 30 | 91 | 73 | 81 | 95 | 108 |
| $\text{Li}_3\text{Sc}_{0.5}\text{Sm}_{0.5}\text{Cl}_6$ | 31 | 36 | 21 | 86 | 92 | 76 | 90 | 103 |
| $\text{Li}_3\text{Sc}_{0.5}\text{Tb}_{0.5}\text{Cl}_6$ | 30 | 27 | 19 | 84 | 87 | 73 | 87 | 98  |
| $\text{Li}_3\text{Sc}_{0.5}\text{Dy}_{0.5}\text{Cl}_6$ | 31 | 36 | 21 | 86 | 65 | 75 | 90 | 103 |
| $\text{Li}_3\text{Sc}_{0.5}\text{Ho}_{0.5}\text{Cl}_6$ | 35 | 37 | 24 | 89 | 69 | 78 | 93 | 106 |
| $\text{Li}_3\text{Sc}_{0.5}\text{Y}_{0.5}\text{Cl}_6$  | 26 | 31 | 16 | 81 | 60 | 70 | 84 | 97  |
| $\text{Li}_3\text{Sc}_{0.5}\text{Er}_{0.5}\text{Cl}_6$ | 35 | 37 | 24 | 89 | 94 | 79 | 93 | 106 |
| $\text{Li}_3\text{Sc}_{0.5}\text{Tm}_{0.5}\text{Cl}_6$ | 34 | 39 | 22 | 88 | 93 | 78 | 93 | 106 |
| $\text{Li}_3\text{Sc}_{0.5}\text{Lu}_{0.5}\text{Cl}_6$ | 38 | 39 | 25 | 92 | 73 | 83 | 97 | 112 |
| $\text{Li}_3\text{Bi}_{0.5}\text{Sm}_{0.5}\text{Cl}_6$ | 27 | 28 | 18 | 74 | 55 | 63 | 75 | 86  |
| $\text{Li}_3\text{Bi}_{0.5}\text{Tb}_{0.5}\text{Cl}_6$ | 26 | 18 | 16 | 73 | 52 | 61 | 74 | 84  |
| $\text{Li}_3\text{Bi}_{0.5}\text{Dy}_{0.5}\text{Cl}_6$ | 28 | 27 | 18 | 74 | 54 | 63 | 75 | 81  |
| $\text{Li}_3\text{Bi}_{0.5}\text{Ho}_{0.5}\text{Cl}_6$ | 33 | 28 | 22 | 78 | 58 | 67 | 90 | 92  |
| $\text{Li}_3\text{Bi}_{0.5}\text{Y}_{0.5}\text{Cl}_6$  | 20 | 22 | 11 | 69 | 49 | 57 | 69 | 87  |
| $\text{Li}_3\text{Bi}_{0.5}\text{Er}_{0.5}\text{Cl}_6$ | 33 | 29 | 22 | 78 | 59 | 67 | 79 | 92  |
| $\text{Li}_3\text{Bi}_{0.5}\text{Tm}_{0.5}\text{Cl}_6$ | 31 | 30 | 20 | 77 | 58 | 67 | 79 | 91  |
| $\text{Li}_3\text{Bi}_{0.5}\text{Lu}_{0.5}\text{Cl}_6$ | 37 | 31 | 24 | 82 | 64 | 72 | 85 | 98  |
| $\text{Li}_3\text{Bi}_{0.5}\text{Sc}_{0.5}\text{Cl}_6$ | 17 | 29 | 12 | 78 | 59 | 69 | 83 | 96  |
| $\text{Li}_3\text{In}_{0.5}\text{Ho}_{0.5}\text{Cl}_6$ | 33 | 24 | 22 | 73 | 51 | 61 | 74 | 86  |
| $\text{Li}_3\text{In}_{0.5}\text{Er}_{0.5}\text{Cl}_6$ | 33 | 25 | 22 | 73 | 52 | 61 | 74 | 87  |
| $\text{Li}_3\text{In}_{0.5}\text{Tm}_{0.5}\text{Cl}_6$ | 31 | 27 | 20 | 72 | 51 | 60 | 73 | 86  |
| $\text{Li}_3\text{In}_{0.5}\text{Lu}_{0.5}\text{Cl}_6$ | 37 | 29 | 24 | 76 | 57 | 65 | 79 | 92  |

**Table S9.** Sources of volume change of interface between solid electrolytes and cathode materials ( $\text{LiFePO}_4$  (LFP),  $\text{LiMn}_2\text{O}_4$  (LMO),  $\text{Li}(\text{NiMnCo})_{1/3}\text{O}_2$  (NCM), and  $\text{LiCoO}_2$  (LC

O)).

| Chemical interface reaction                                         |                                                                     | Composition                              | Density<br>(g/cm <sup>3</sup> )          | Weight<br>(g/mol) | Molar<br>volume<br>(cm <sup>3</sup> /mol) | Net<br>volume |       |
|---------------------------------------------------------------------|---------------------------------------------------------------------|------------------------------------------|------------------------------------------|-------------------|-------------------------------------------|---------------|-------|
| LFP                                                                 | Li <sub>3</sub> Ho <sub>0.5</sub> Tb <sub>0.5</sub> Cl <sub>6</sub> | Reactant                                 | 0.2 Li <sub>6</sub> TbHoCl <sub>12</sub> | 2.94              | 790.94                                    | 268.94        | 53.79 |
|                                                                     |                                                                     |                                          | 0.8 LiFePO <sub>4</sub>                  | 3.47              | 157.75                                    | 45.46         | 36.37 |
|                                                                     |                                                                     |                                          | 0.4 Fe <sub>2</sub> PClO <sub>4</sub>    | 3.54              | 242.11                                    | 68.39         | 27.36 |
|                                                                     |                                                                     | Product                                  | 0.2 TbPO <sub>4</sub>                    | 5.66              | 253.89                                    | 44.86         | 8.97  |
|                                                                     |                                                                     |                                          | 0.2 HoPO <sub>4</sub>                    | 5.93              | 259.90                                    | 43.83         | 8.77  |
|                                                                     |                                                                     |                                          | 2 LiCl                                   | 1.66              | 42.39                                     | 25.54         | 51.07 |
|                                                                     | Li <sub>3</sub> Ho <sub>0.5</sub> Tb <sub>0.5</sub> Cl <sub>6</sub> | Reactant                                 | 0.8 LiFePO <sub>4</sub>                  | 3.47              | 157.75                                    | 45.46         | 36.37 |
|                                                                     |                                                                     |                                          | 0.2 Li <sub>6</sub> DyHoCl <sub>12</sub> | 2.95              | 794.51                                    | 268.94        | 53.79 |
|                                                                     |                                                                     |                                          | 0.4 Fe <sub>2</sub> PClO <sub>4</sub>    | 3.54              | 242.11                                    | 68.39         | 27.36 |
|                                                                     |                                                                     | Product                                  | 0.2 DyPO <sub>4</sub>                    | 5.81              | 257.47                                    | 44.31         | 8.86  |
|                                                                     |                                                                     |                                          | 0.2 HoPO <sub>4</sub>                    | 5.93              | 259.90                                    | 43.83         | 8.77  |
|                                                                     |                                                                     |                                          | 2 LiCl                                   | 1.66              | 42.39                                     | 25.54         | 51.07 |
| Li <sub>3</sub> Tm <sub>0.5</sub> Y <sub>0.5</sub> Cl <sub>6</sub>  | Reactant                                                            | 0.2 Li <sub>6</sub> YTmCl <sub>12</sub>  | 2.69                                     | 724.92            | 268.94                                    | 53.79         |       |
|                                                                     |                                                                     | 0.8 LiFePO <sub>4</sub>                  | 3.47                                     | 157.75            | 45.46                                     | 36.37         |       |
|                                                                     |                                                                     | 0.4 Fe <sub>2</sub> PClO <sub>4</sub>    | 3.54                                     | 242.11            | 68.39                                     | 27.36         |       |
|                                                                     | Product                                                             | 0.2 TmPO <sub>4</sub>                    | 6.18                                     | 263.90            | 42.70                                     | 8.54          |       |
|                                                                     |                                                                     | 0.2 YPO <sub>4</sub>                     | 4.12                                     | 183.87            | 44.63                                     | 8.93          |       |
|                                                                     |                                                                     | 2 LiCl                                   | 1.66                                     | 42.39             | 25.54                                     | 51.07         |       |
| Li <sub>3</sub> Lu <sub>0.5</sub> Tb <sub>0.5</sub> Cl <sub>6</sub> | Reactant                                                            | 0.2 Li <sub>6</sub> TbLuCl <sub>12</sub> | 2.97                                     | 800.97            | 268.94                                    | 53.79         |       |
|                                                                     |                                                                     | 0.8 LiFePO <sub>4</sub>                  | 3.47                                     | 157.75            | 45.46                                     | 36.37         |       |
|                                                                     |                                                                     | 0.4 Fe <sub>2</sub> PClO <sub>4</sub>    | 3.54                                     | 242.11            | 68.39                                     | 27.36         |       |
|                                                                     | Product                                                             | 0.2 TbPO <sub>4</sub>                    | 5.66                                     | 253.89            | 44.86                                     | 8.97          |       |
|                                                                     |                                                                     | 0.2 LuPO <sub>4</sub>                    | 6.44                                     | 269.93            | 41.91                                     | 8.38          |       |
|                                                                     |                                                                     | 2 LiCl                                   | 1.66                                     | 42.39             | 25.54                                     | 51.07         |       |
| Li <sub>3</sub> Lu <sub>0.5</sub> Y <sub>0.5</sub> Cl <sub>6</sub>  | Reactant                                                            | 0.2 Li <sub>6</sub> YLuCl <sub>12</sub>  | 2.72                                     | 730.95            | 268.94                                    | 53.79         |       |
|                                                                     |                                                                     | 0.8 LiFePO <sub>4</sub>                  | 3.47                                     | 157.75            | 45.46                                     | 36.37         |       |
|                                                                     |                                                                     | 0.4 Fe <sub>2</sub> PClO <sub>4</sub>    | 3.54                                     | 242.11            | 68.39                                     | 27.36         |       |
|                                                                     | Product                                                             | 0.2 YPO <sub>4</sub>                     | 4.12                                     | 183.87            | 44.63                                     | 8.93          |       |
|                                                                     |                                                                     | 0.2 LuPO <sub>4</sub>                    | 6.44                                     | 269.93            | 41.91                                     | 8.38          |       |
|                                                                     |                                                                     | 2 LiCl                                   | 1.66                                     | 42.39             | 25.54                                     | 51.07         |       |
| Li <sub>3</sub> Sc <sub>0.5</sub> Tb <sub>0.5</sub> Cl <sub>6</sub> | Reactant                                                            | 0.2 Li <sub>6</sub> TbScCl <sub>12</sub> | 2.63                                     | 670.96            | 255.30                                    | 51.06         |       |
|                                                                     |                                                                     | 0.8 LiFePO <sub>4</sub>                  | 3.47                                     | 157.75            | 45.46                                     | 36.37         |       |
|                                                                     |                                                                     | 0.4 Fe <sub>2</sub> PClO <sub>4</sub>    | 3.54                                     | 242.11            | 68.39                                     | 27.36         |       |
|                                                                     | Product                                                             | 0.2 TbPO <sub>4</sub>                    | 5.66                                     | 253.89            | 44.86                                     | 8.97          |       |
|                                                                     |                                                                     | 0.2 ScPO <sub>4</sub>                    | 3.58                                     | 139.92            | 39.08                                     | 7.82          |       |
|                                                                     |                                                                     | 2 LiCl                                   | 1.66                                     | 42.39             | 25.54                                     | 51.07         |       |
| Li <sub>3</sub> Sc <sub>0.5</sub> Y <sub>0.5</sub> Cl <sub>6</sub>  | Reactant                                                            | 0.2 Li <sub>6</sub> YScCl <sub>12</sub>  | 2.35                                     | 600.94            | 255.30                                    | 51.06         |       |
|                                                                     |                                                                     | 0.8 LiFePO <sub>4</sub>                  | 3.47                                     | 157.75            | 45.46                                     | 36.37         |       |
|                                                                     |                                                                     | 0.4 Fe <sub>2</sub> PClO <sub>4</sub>    | 3.54                                     | 242.11            | 68.39                                     | 27.36         |       |
|                                                                     | Product                                                             | 0.2 YPO <sub>4</sub>                     | 4.12                                     | 183.87            | 44.63                                     | 8.93          |       |
|                                                                     |                                                                     | 0.2 ScPO <sub>4</sub>                    | 3.58                                     | 139.92            | 39.08                                     | 7.82          |       |
|                                                                     |                                                                     | 2 LiCl                                   | 1.66                                     | 42.39             | 25.54                                     | 51.07         |       |

|                                                                     |                                                                     |                                                |                                                |        |        |        |       |
|---------------------------------------------------------------------|---------------------------------------------------------------------|------------------------------------------------|------------------------------------------------|--------|--------|--------|-------|
| LCO                                                                 | Li <sub>3</sub> Lu <sub>0.5</sub> Ho <sub>0.5</sub> Cl <sub>6</sub> | Reactant                                       | 0.2 Li <sub>6</sub> HoLuCl <sub>12</sub>       | 3.02   | 806.98 | 267.61 | 53.52 |
|                                                                     |                                                                     |                                                | 0.8 LiFePO <sub>4</sub>                        | 3.47   | 157.75 | 45.46  | 36.37 |
|                                                                     |                                                                     |                                                | 0.4 Fe <sub>2</sub> PClO <sub>4</sub>          | 3.54   | 242.11 | 68.39  | 27.36 |
|                                                                     |                                                                     | Product                                        | 0.2 HoPO <sub>4</sub>                          | 5.93   | 259.90 | 43.83  | 8.77  |
|                                                                     |                                                                     |                                                | 0.2 LuPO <sub>4</sub>                          | 6.44   | 269.93 | 41.91  | 8.38  |
|                                                                     |                                                                     |                                                | 2 LiCl                                         | 1.66   | 42.39  | 25.54  | 51.07 |
|                                                                     | Li <sub>3</sub> Lu <sub>0.5</sub> Er <sub>0.5</sub> Cl <sub>6</sub> | Reactant                                       | 0.2 Li <sub>6</sub> ErLuCl <sub>12</sub>       | 3.01   | 809.31 | 268.94 | 53.79 |
|                                                                     |                                                                     |                                                | 0.8 LiFePO <sub>4</sub>                        | 3.47   | 157.75 | 45.46  | 36.37 |
|                                                                     |                                                                     |                                                | 0.4 Fe <sub>2</sub> PClO <sub>4</sub>          | 3.54   | 242.11 | 68.39  | 27.36 |
|                                                                     |                                                                     | Product                                        | 0.2 ErPO <sub>4</sub>                          | 6.06   | 262.23 | 43.29  | 8.66  |
|                                                                     |                                                                     |                                                | 0.2 LuPO <sub>4</sub>                          | 6.44   | 269.93 | 41.91  | 8.38  |
|                                                                     |                                                                     |                                                | 2 LiCl                                         | 1.66   | 42.39  | 25.54  | 51.07 |
|                                                                     | Li <sub>3</sub> Lu <sub>0.5</sub> Tm <sub>0.5</sub> Cl <sub>6</sub> | Reactant                                       | 0.2 Li <sub>6</sub> TmLuCl <sub>12</sub>       | 3.00   | 810.98 | 270.27 | 54.05 |
|                                                                     |                                                                     |                                                | 0.8 LiFePO <sub>4</sub>                        | 3.47   | 157.75 | 45.46  | 36.37 |
|                                                                     |                                                                     |                                                | 0.4 Fe <sub>2</sub> PClO <sub>4</sub>          | 3.54   | 242.11 | 68.32  | 27.33 |
|                                                                     |                                                                     | Product                                        | 0.2 TmPO <sub>4</sub>                          | 6.18   | 263.90 | 42.70  | 8.54  |
|                                                                     |                                                                     |                                                | 0.2 LuPO <sub>4</sub>                          | 6.44   | 269.93 | 41.91  | 8.38  |
|                                                                     |                                                                     |                                                | 2 LiCl                                         | 1.66   | 42.39  | 25.54  | 51.07 |
| LCO                                                                 | Li <sub>3</sub> Ho <sub>0.5</sub> Tb <sub>0.5</sub> Cl <sub>6</sub> | Reactant                                       | 0.1429<br>Li <sub>6</sub> TbHoCl <sub>12</sub> | 2.94   | 790.94 | 268.94 | 38.43 |
|                                                                     |                                                                     |                                                | 0.8571 LiCoO <sub>2</sub>                      | 4.68   | 97.87  | 20.91  | 17.92 |
|                                                                     |                                                                     |                                                | 0.1429 TbCoO <sub>3</sub>                      | 8.33   | 265.85 | 31.91  | 4.56  |
|                                                                     |                                                                     | Product                                        | 0.1429 HoClO                                   | 7.07   | 216.38 | 30.61  | 4.37  |
|                                                                     |                                                                     |                                                | 0.1429 Li(CoO <sub>2</sub> ) <sub>2</sub>      | 4.78   | 188.80 | 39.50  | 5.64  |
|                                                                     |                                                                     |                                                | 0.1429 Co <sub>3</sub> O <sub>4</sub>          | 5.52   | 240.79 | 43.62  | 6.23  |
|                                                                     | Li <sub>3</sub> Ho <sub>0.5</sub> Dy <sub>0.5</sub> Cl <sub>6</sub> | Reactant                                       | 1.571 LiCl                                     | 1.66   | 42.39  | 25.54  | 40.12 |
|                                                                     |                                                                     |                                                | 0.1667<br>Li <sub>6</sub> DyHoCl <sub>12</sub> | 2.95   | 794.51 | 268.94 | 44.83 |
|                                                                     |                                                                     |                                                | 0.8333 LiCoO <sub>2</sub>                      | 4.68   | 97.87  | 20.91  | 17.43 |
|                                                                     |                                                                     | Product                                        | 0.1667 DyClO                                   | 5.92   | 213.95 | 36.14  | 6.02  |
|                                                                     |                                                                     |                                                | 0.1667 HoClO                                   | 7.07   | 216.38 | 30.61  | 5.10  |
|                                                                     |                                                                     |                                                | 0.1667 Li(CoO <sub>2</sub> ) <sub>2</sub>      | 4.78   | 188.80 | 39.50  | 6.58  |
|                                                                     | Li <sub>3</sub> Tm <sub>0.5</sub> Y <sub>0.5</sub> Cl <sub>6</sub>  | Reactant                                       | 0.1667 Co <sub>3</sub> O <sub>4</sub>          | 5.52   | 240.79 | 43.62  | 7.24  |
|                                                                     |                                                                     |                                                | 1.667 LiCl                                     | 1.66   | 42.39  | 25.54  | 42.57 |
|                                                                     |                                                                     |                                                | 0.1667<br>Li <sub>6</sub> YTmCl <sub>12</sub>  | 2.69   | 724.92 | 268.94 | 44.83 |
|                                                                     |                                                                     | Product                                        | 0.8333 LiCoO <sub>2</sub>                      | 4.68   | 97.87  | 20.91  | 17.43 |
|                                                                     |                                                                     |                                                | 0.1667 YClO                                    | 3.83   | 140.35 | 36.64  | 6.11  |
|                                                                     |                                                                     |                                                | 0.1667 TmClO                                   | 6.35   | 220.38 | 34.71  | 5.79  |
| Li <sub>3</sub> Lu <sub>0.5</sub> Tb <sub>0.5</sub> Cl <sub>6</sub> | Reactant                                                            | 0.1667 Li(CoO <sub>2</sub> ) <sub>2</sub>      | 4.78                                           | 188.80 | 39.50  | 6.56   |       |
|                                                                     |                                                                     | 0.1667 Co <sub>3</sub> O <sub>4</sub>          | 5.52                                           | 240.79 | 43.62  | 7.24   |       |
|                                                                     |                                                                     | 1.667 LiCl                                     | 1.66                                           | 42.39  | 25.54  | 42.57  |       |
|                                                                     | Product                                                             | 0.2105<br>Li <sub>6</sub> TbLuCl <sub>12</sub> | 2.99                                           | 800.97 | 268.94 | 56.61  |       |
|                                                                     |                                                                     | 0.7895 LiCoO <sub>2</sub>                      | 4.68                                           | 97.87  | 20.91  | 16.51  |       |
|                                                                     |                                                                     | 0.2105 TbCl <sub>3</sub>                       | 3.52                                           | 265.28 | 75.36  | 15.86  |       |
| Li <sub>3</sub> Lu <sub>0.5</sub> Tb <sub>0.5</sub> Cl <sub>6</sub> | Product                                                             | 0.1053 Lu <sub>2</sub> O <sub>3</sub>          | 9.49                                           | 397.93 | 41.93  | 4.42   |       |
|                                                                     |                                                                     | 0.1579 Li(CoO <sub>2</sub> ) <sub>2</sub>      | 4.78                                           | 188.80 | 39.50  | 6.24   |       |

|                                                                     |          |                                                |      |        |        |       |
|---------------------------------------------------------------------|----------|------------------------------------------------|------|--------|--------|-------|
|                                                                     |          | 0.1579 Co <sub>3</sub> O <sub>4</sub>          | 5.52 | 240.79 | 43.62  | 6.89  |
|                                                                     |          | 1.895 LiCl                                     | 1.66 | 42.39  | 25.54  | 48.39 |
|                                                                     | Reactant | 0.1379<br>Li <sub>6</sub> YLuCl <sub>12</sub>  | 2.72 | 730.95 | 268.94 | 37.09 |
|                                                                     | Product  | 0.8621 LiCoO <sub>2</sub>                      | 4.68 | 97.87  | 20.91  | 18.03 |
| Li <sub>3</sub> Lu <sub>0.5</sub> Y <sub>0.5</sub> Cl <sub>6</sub>  |          | 0.1379 YClO                                    | 3.83 | 140.35 | 36.64  | 5.05  |
|                                                                     |          | 0.06897 Lu <sub>2</sub> O <sub>3</sub>         | 9.49 | 397.93 | 41.93  | 2.89  |
|                                                                     |          | 0.1724 Li(CoO <sub>2</sub> ) <sub>2</sub>      | 4.78 | 188.80 | 39.50  | 6.81  |
|                                                                     |          | 0.1724 Co <sub>3</sub> O <sub>4</sub>          | 5.52 | 240.79 | 43.62  | 7.52  |
|                                                                     |          | 1.517 LiCl                                     | 1.66 | 42.39  | 25.54  | 38.74 |
|                                                                     | Reactant | 0.1212<br>Li <sub>6</sub> TbScCl <sub>12</sub> | 2.63 | 670.96 | 255.30 | 30.94 |
|                                                                     | Product  | 0.8788 LiCoO <sub>2</sub>                      | 4.68 | 97.87  | 20.91  | 18.38 |
| Li <sub>3</sub> Sc <sub>0.5</sub> Tb <sub>0.5</sub> Cl <sub>6</sub> |          | 0.06061 Sc <sub>2</sub> O <sub>3</sub>         | 3.75 | 137.91 | 36.78  | 2.23  |
|                                                                     |          | 0.1212 TbCoO <sub>3</sub>                      | 8.33 | 265.85 | 31.91  | 3.87  |
|                                                                     |          | 0.1515 Li(CoO <sub>2</sub> ) <sub>2</sub>      | 4.78 | 188.80 | 39.50  | 5.96  |
|                                                                     |          | 0.1515 Co <sub>3</sub> O <sub>4</sub>          | 5.52 | 240.79 | 43.62  | 6.61  |
|                                                                     |          | 1.455 LiCl                                     | 1.66 | 42.39  | 25.54  | 37.16 |
|                                                                     | Reactant | 0.1379<br>Li <sub>6</sub> YScCl <sub>12</sub>  | 2.35 | 600.94 | 255.30 | 35.21 |
|                                                                     | Product  | 0.8621 LiCoO <sub>2</sub>                      | 4.68 | 97.87  | 20.91  | 18.03 |
| Li <sub>3</sub> Sc <sub>0.5</sub> Y <sub>0.5</sub> Cl <sub>6</sub>  |          | 0.06897 Sc <sub>2</sub> O <sub>3</sub>         | 3.75 | 137.91 | 36.78  | 2.53  |
|                                                                     |          | 0.1379 YClO                                    | 3.83 | 140.35 | 36.64  | 5.05  |
|                                                                     |          | 0.1724 Li(CoO <sub>2</sub> ) <sub>2</sub>      | 4.78 | 188.80 | 39.50  | 6.81  |
|                                                                     |          | 0.1724 Co <sub>3</sub> O <sub>4</sub>          | 5.52 | 240.79 | 43.62  | 7.52  |
|                                                                     |          | 1.517 LiCl                                     | 1.66 | 42.39  | 25.54  | 38.74 |
|                                                                     | Reactant | 0.1379<br>Li <sub>6</sub> HoLuCl <sub>12</sub> | 3.01 | 806.98 | 267.61 | 36.90 |
|                                                                     | Product  | 0.8621 LiCoO <sub>2</sub>                      | 4.68 | 97.87  | 20.91  | 18.03 |
| Li <sub>3</sub> Lu <sub>0.5</sub> Ho <sub>0.5</sub> Cl <sub>6</sub> |          | 0.1724 Li(CoO <sub>2</sub> ) <sub>2</sub>      | 4.78 | 188.80 | 39.50  | 6.81  |
|                                                                     |          | 0.1724 Co <sub>3</sub> O <sub>4</sub>          | 5.52 | 240.79 | 43.62  | 7.52  |
|                                                                     |          | 1.517 LiCl                                     | 1.66 | 42.39  | 25.54  | 38.74 |
|                                                                     |          | 0.1379 HoClO                                   | 7.07 | 216.38 | 30.61  | 4.22  |
|                                                                     |          | 0.06897 Lu <sub>2</sub> O <sub>3</sub>         | 9.49 | 397.93 | 41.93  | 2.89  |
|                                                                     | Reactant | 0.1379<br>Li <sub>6</sub> ErLuCl <sub>12</sub> | 3.01 | 809.31 | 268.94 | 37.09 |
|                                                                     | Product  | 0.8621 LiCoO <sub>2</sub>                      | 4.68 | 97.87  | 20.91  | 18.03 |
| Li <sub>3</sub> Lu <sub>0.5</sub> Er <sub>0.5</sub> Cl <sub>6</sub> |          | 0.1724 Li(CoO <sub>2</sub> ) <sub>2</sub>      | 4.78 | 188.80 | 39.50  | 6.79  |
|                                                                     |          | 0.1724 Co <sub>3</sub> O <sub>4</sub>          | 5.52 | 240.79 | 43.62  | 7.52  |
|                                                                     |          | 1.517 LiCl                                     | 1.66 | 42.39  | 25.54  | 38.74 |
|                                                                     |          | 0.1379 ErClO                                   | 5.07 | 218.71 | 43.17  | 5.95  |
|                                                                     |          | 0.06897 Lu <sub>2</sub> O <sub>3</sub>         | 9.49 | 397.93 | 41.93  | 2.85  |
|                                                                     | Reactant | 0.8621 LiCoO <sub>2</sub>                      | 4.68 | 97.87  | 20.91  | 18.03 |
|                                                                     | Product  | 0.1379<br>Li <sub>6</sub> TmLuCl <sub>12</sub> | 3.00 | 810.98 | 270.27 | 37.27 |
| Li <sub>3</sub> Lu <sub>0.5</sub> Tm <sub>0.5</sub> Cl <sub>6</sub> |          | 0.1724 Li(CoO <sub>2</sub> ) <sub>2</sub>      | 4.78 | 188.80 | 39.50  | 6.81  |
|                                                                     |          | 0.1724 Co <sub>3</sub> O <sub>4</sub>          | 5.52 | 240.79 | 43.62  | 7.52  |
|                                                                     |          | 1.517 LiCl                                     | 1.66 | 42.39  | 25.54  | 38.74 |
|                                                                     |          | 0.1379 TmClO                                   | 6.35 | 220.38 | 34.71  | 4.75  |



|     |                                                                     |                                                             |      |        |        |       |
|-----|---------------------------------------------------------------------|-------------------------------------------------------------|------|--------|--------|-------|
|     |                                                                     | 0.06897 Lu <sub>2</sub> O <sub>3</sub>                      | 9.49 | 397.93 | 41.93  | 2.85  |
|     |                                                                     | 0.1667<br>Li <sub>6</sub> TbHoCl <sub>12</sub>              | 2.94 | 790.94 | 268.94 | 44.83 |
|     |                                                                     | 0.8333 LiMn <sub>2</sub> O <sub>4</sub>                     | 4.01 | 180.81 | 45.09  | 37.57 |
|     |                                                                     | 0.1667 HoMn <sub>2</sub> O <sub>5</sub>                     | 6.50 | 354.80 | 54.58  | 9.10  |
|     | Li <sub>3</sub> Ho <sub>0.5</sub> Tb <sub>0.5</sub> Cl <sub>6</sub> | 0.1667 TbMn <sub>2</sub> O <sub>5</sub>                     | 6.30 | 348.79 | 55.36  | 9.23  |
|     |                                                                     | 0.05556<br>Mn <sub>8</sub> Cl <sub>3</sub> O <sub>10</sub>  | 3.93 | 705.85 | 179.61 | 9.97  |
|     |                                                                     | 0.5556 MnO <sub>2</sub>                                     | 4.01 | 86.93  | 21.68  | 12.04 |
|     |                                                                     | 1.833 LiCl                                                  | 1.66 | 42.39  | 25.54  | 46.81 |
|     |                                                                     | 0.1667<br>Li <sub>6</sub> DyHoCl <sub>12</sub>              | 2.95 | 794.51 | 268.94 | 44.83 |
|     |                                                                     | 0.8333 LiMn <sub>2</sub> O <sub>4</sub>                     | 4.01 | 180.81 | 45.09  | 37.57 |
|     |                                                                     | 0.1667 HoMn <sub>2</sub> O <sub>5</sub>                     | 6.50 | 354.80 | 54.58  | 9.10  |
|     | Li <sub>3</sub> Ho <sub>0.5</sub> Dy <sub>0.5</sub> Cl <sub>6</sub> | 0.1667 DyMn <sub>2</sub> O                                  | 6.49 | 354.80 | 54.68  | 9.11  |
|     |                                                                     | 0.05556<br>Mn <sub>8</sub> Cl <sub>3</sub> O <sub>10</sub>  | 3.93 | 705.85 | 179.61 | 9.97  |
|     |                                                                     | 0.5556 MnO <sub>2</sub>                                     | 4.01 | 86.93  | 21.68  | 12.04 |
|     |                                                                     | 1.833 LiCl                                                  | 1.66 | 42.39  | 25.54  | 46.81 |
|     |                                                                     | 0.1667<br>Li <sub>6</sub> Y <sub>2</sub> TmCl <sub>12</sub> | 2.69 | 724.92 | 268.94 | 44.83 |
|     |                                                                     | 0.8333 LiMn <sub>2</sub> O <sub>4</sub>                     | 4.01 | 180.81 | 45.09  | 37.57 |
|     |                                                                     | 0.1667 TmMn <sub>2</sub> O <sub>5</sub>                     | 6.66 | 358.80 | 53.87  | 8.94  |
| LMO | Li <sub>3</sub> Tm <sub>0.5</sub> Y <sub>0.5</sub> Cl <sub>6</sub>  | 0.1667 YMn <sub>2</sub> O <sub>5</sub>                      | 5.05 | 278.77 | 55.20  | 9.16  |
|     |                                                                     | 0.05556<br>Mn <sub>8</sub> Cl <sub>3</sub> O <sub>10</sub>  | 3.93 | 705.85 | 179.61 | 9.97  |
|     |                                                                     | 0.5556 MnO <sub>2</sub>                                     | 4.01 | 86.93  | 21.68  | 12.04 |
|     |                                                                     | 1.833 LiCl                                                  | 1.66 | 42.39  | 25.54  | 46.81 |
|     |                                                                     | 0.1667<br>Li <sub>6</sub> TbLuCl <sub>12</sub>              | 2.97 | 800.97 | 268.94 | 44.83 |
|     |                                                                     | 0.8333 LiMn <sub>2</sub> O <sub>4</sub>                     | 4.01 | 180.81 | 45.09  | 37.57 |
|     |                                                                     | 0.1667 LuMn <sub>2</sub> O <sub>5</sub>                     | 6.86 | 364.84 | 53.18  | 8.87  |
|     | Li <sub>3</sub> Lu <sub>0.5</sub> Tb <sub>0.5</sub> Cl <sub>6</sub> | 0.1667 TbMn <sub>2</sub> O <sub>5</sub>                     | 6.30 | 348.79 | 55.36  | 9.23  |
|     |                                                                     | 0.05556<br>Mn <sub>8</sub> Cl <sub>3</sub> O <sub>10</sub>  | 3.93 | 705.85 | 179.61 | 9.97  |
|     |                                                                     | 0.5556 MnO <sub>2</sub>                                     | 4.01 | 86.93  | 21.68  | 12.04 |
|     |                                                                     | 1.833 LiCl                                                  | 1.66 | 42.39  | 25.54  | 46.81 |
|     |                                                                     | 0.2857<br>Li <sub>6</sub> YLuCl <sub>12</sub>               | 2.72 | 730.95 | 268.94 | 76.84 |
|     |                                                                     | 0.7143 LiMn <sub>2</sub> O <sub>4</sub>                     | 4.01 | 180.81 | 45.09  | 32.21 |
|     |                                                                     | 0.2857 LuMn <sub>2</sub> O <sub>5</sub>                     | 6.86 | 364.84 | 53.18  | 15.19 |
|     | Li <sub>3</sub> Lu <sub>0.5</sub> Y <sub>0.5</sub> Cl <sub>6</sub>  | 0.2857 YCl <sub>3</sub>                                     | 2.29 | 195.26 | 85.27  | 24.36 |
|     |                                                                     | 0.04762<br>Mn <sub>8</sub> Cl <sub>3</sub> O <sub>10</sub>  | 3.93 | 705.85 | 179.61 | 8.55  |
|     |                                                                     | 0.4762 MnO <sub>2</sub>                                     | 4.01 | 86.93  | 21.68  | 10.32 |

|                                                                     |                                         |                                                            |        |        |        |       |
|---------------------------------------------------------------------|-----------------------------------------|------------------------------------------------------------|--------|--------|--------|-------|
|                                                                     |                                         | 2.429 LiCl                                                 | 1.66   | 42.39  | 25.54  | 62.03 |
|                                                                     | Reactant                                | 0.1739<br>Li <sub>6</sub> TbScCl <sub>12</sub>             | 2.63   | 670.96 | 255.30 | 44.40 |
|                                                                     |                                         | 0.8261 LiMn <sub>2</sub> O <sub>4</sub>                    | 4.01   | 180.81 | 45.09  | 37.25 |
|                                                                     | Product                                 | 0.1739 TbMn <sub>2</sub> O <sub>5</sub>                    | 6.30   | 348.79 | 55.36  | 9.63  |
| Li <sub>3</sub> Sc <sub>0.5</sub> Tb <sub>0.5</sub> Cl <sub>6</sub> |                                         | 0.08696<br>Sc <sub>2</sub> Mn <sub>2</sub> O <sub>7</sub>  | 4.51   | 311.78 | 69.13  | 6.01  |
|                                                                     |                                         | 0.07246<br>Mn <sub>8</sub> Cl <sub>3</sub> O <sub>10</sub> | 3.93   | 705.85 | 179.61 | 13.00 |
|                                                                     |                                         | 0.5507 MnO <sub>2</sub>                                    | 4.01   | 86.93  | 21.68  | 11.94 |
|                                                                     |                                         | 1.87 LiCl                                                  | 1.66   | 42.39  | 25.54  | 47.75 |
|                                                                     |                                         | 0.1739<br>Li <sub>6</sub> YScCl <sub>12</sub>              | 2.36   | 600.94 | 255.30 | 44.40 |
|                                                                     | 0.8261 LiMn <sub>2</sub> O <sub>4</sub> | 4.01                                                       | 180.81 | 45.09  | 37.25  |       |
|                                                                     | Product                                 | 0.08696<br>Sc <sub>2</sub> Mn <sub>2</sub> O <sub>7</sub>  | 4.51   | 311.78 | 69.13  | 6.01  |
| Li <sub>3</sub> Sc <sub>0.5</sub> Y <sub>0.5</sub> Cl <sub>6</sub>  |                                         | 0.1739 YMn <sub>2</sub> O <sub>5</sub>                     | 5.05   | 278.77 | 55.20  | 9.60  |
|                                                                     |                                         | 0.07246<br>Mn <sub>8</sub> Cl <sub>3</sub> O <sub>10</sub> | 3.93   | 705.85 | 179.61 | 13.00 |
|                                                                     |                                         | 0.5507 MnO <sub>2</sub>                                    | 4.01   | 86.93  | 21.68  | 11.94 |
|                                                                     |                                         | 1.87 LiCl                                                  | 1.66   | 42.39  | 25.54  | 47.75 |
|                                                                     |                                         | 0.1667<br>Li <sub>6</sub> HoLuCl <sub>12</sub>             | 3.02   | 806.98 | 267.61 | 44.61 |
|                                                                     | 0.8333 LiMn <sub>2</sub> O <sub>4</sub> | 4.01                                                       | 180.81 | 45.09  | 37.57  |       |
|                                                                     | Product                                 | 0.1667 LuMn <sub>2</sub> O <sub>5</sub>                    | 6.86   | 364.84 | 53.18  | 8.87  |
| Li <sub>3</sub> Lu <sub>0.5</sub> Ho <sub>0.5</sub> Cl <sub>6</sub> |                                         | 0.1667 HoMn <sub>2</sub> O <sub>5</sub>                    | 6.50   | 354.80 | 54.58  | 9.10  |
|                                                                     |                                         | 0.05556<br>Mn <sub>8</sub> Cl <sub>3</sub> O <sub>10</sub> | 3.93   | 705.85 | 179.61 | 9.97  |
|                                                                     |                                         | 0.5556 MnO <sub>2</sub>                                    | 4.01   | 86.93  | 21.68  | 12.03 |
|                                                                     |                                         | 1.833 LiCl                                                 | 1.66   | 42.39  | 25.54  | 46.81 |
|                                                                     |                                         | 0.1667<br>Li <sub>6</sub> ErLuCl <sub>12</sub>             | 3.01   | 809.31 | 268.94 | 44.83 |
|                                                                     | 0.8333 LiMn <sub>2</sub> O <sub>4</sub> | 4.01                                                       | 180.81 | 45.09  | 37.57  |       |
|                                                                     | Product                                 | 0.1667 LuMn <sub>2</sub> O <sub>5</sub>                    | 6.86   | 364.84 | 53.18  | 8.87  |
| Li <sub>3</sub> Lu <sub>0.5</sub> Er <sub>0.5</sub> Cl <sub>6</sub> |                                         | 0.05556<br>Mn <sub>8</sub> Cl <sub>3</sub> O <sub>10</sub> | 3.93   | 705.85 | 179.61 | 9.97  |
|                                                                     |                                         | 0.1667 ErMn <sub>2</sub> O <sub>5</sub>                    | 6.59   | 357.13 | 54.16  | 9.03  |
|                                                                     |                                         | 0.5556 MnO <sub>2</sub>                                    | 4.01   | 86.93  | 21.68  | 12.04 |
|                                                                     |                                         | 1.833 LiCl                                                 | 1.66   | 42.39  | 25.54  | 46.81 |
|                                                                     |                                         | 0.1667<br>Li <sub>6</sub> TmLuCl <sub>12</sub>             | 3.00   | 810.98 | 270.27 | 45.05 |
|                                                                     | 0.8333 LiMn <sub>2</sub> O <sub>4</sub> | 4.01                                                       | 180.81 | 45.09  | 37.57  |       |
|                                                                     | Product                                 | 0.1667 LuMn <sub>2</sub> O <sub>5</sub>                    | 6.86   | 364.84 | 53.18  | 8.83  |
| Li <sub>3</sub> Lu <sub>0.5</sub> Tm <sub>0.5</sub> Cl <sub>6</sub> |                                         | 0.1667 TmMn <sub>2</sub> O <sub>5</sub>                    | 6.67   | 358.81 | 53.82  | 8.93  |
|                                                                     |                                         | 0.05556<br>Mn <sub>8</sub> Cl <sub>3</sub> O <sub>10</sub> | 3.93   | 705.85 | 179.61 | 9.97  |
|                                                                     |                                         | 0.5556 MnO <sub>2</sub>                                    | 4.01   | 86.93  | 21.68  | 12.03 |
|                                                                     |                                         | 1.833 LiCl                                                 | 1.66   | 42.39  | 25.54  | 46.81 |

|                                                                     |                                                                     |                                                       |                                                  |        |        |        |       |
|---------------------------------------------------------------------|---------------------------------------------------------------------|-------------------------------------------------------|--------------------------------------------------|--------|--------|--------|-------|
| NMC11<br>1                                                          | Li <sub>3</sub> Ho <sub>0.5</sub> Tb <sub>0.5</sub> Cl <sub>6</sub> | Reactant                                              | 0.7317                                           | 4.44   | 289.38 | 65.11  | 47.64 |
|                                                                     |                                                                     |                                                       | Li <sub>3</sub> MnCoNiO <sub>6</sub>             |        |        |        |       |
|                                                                     |                                                                     | Product                                               | 0.2683                                           | 2.94   | 790.94 | 268.94 | 72.16 |
|                                                                     |                                                                     |                                                       | Li <sub>6</sub> TbHoCl <sub>12</sub>             |        |        |        |       |
|                                                                     |                                                                     |                                                       | 0.1272                                           | 8.03   | 539.49 | 67.21  | 8.55  |
|                                                                     |                                                                     |                                                       | Ho <sub>2</sub> MnNiO <sub>6</sub>               |        |        |        |       |
|                                                                     |                                                                     |                                                       | 0.006969                                         | 7.32   | 551.73 | 75.38  | 0.52  |
|                                                                     |                                                                     |                                                       | Ho <sub>2</sub> Mn <sub>2</sub> O <sub>7</sub>   |        |        |        |       |
|                                                                     |                                                                     |                                                       | 0.09059                                          | 5.99   | 535.09 | 89.36  | 8.09  |
|                                                                     |                                                                     |                                                       | Mn(Ni <sub>3</sub> O <sub>4</sub> ) <sub>2</sub> |        |        |        |       |
|                                                                     | 0.1463                                                              | 4.40                                                  | 569.36                                           | 129.50 | 18.95  |        |       |
|                                                                     | Li <sub>4</sub> MnCo <sub>5</sub> O <sub>12</sub>                   |                                                       |                                                  |        |        |        |       |
|                                                                     | 0.06098                                                             | 7.77                                                  | 527.48                                           | 67.89  | 4.13   |        |       |
|                                                                     | Tb <sub>2</sub> MnNiO <sub>6</sub>                                  |                                                       |                                                  |        |        |        |       |
|                                                                     | 0.1463 TbMn <sub>2</sub> O <sub>5</sub>                             | 6.30                                                  | 348.80                                           | 55.34  | 8.10   |        |       |
|                                                                     | 3.22 LiCl                                                           | 1.66                                                  | 42.39                                            | 25.54  | 82.23  |        |       |
|                                                                     | Li <sub>3</sub> Ho <sub>0.5</sub> Dy <sub>0.5</sub> Cl <sub>6</sub> | Reactant                                              | 0.7143                                           | 4.44   | 289.38 | 65.11  | 46.51 |
|                                                                     |                                                                     |                                                       | Li <sub>3</sub> MnCoNiO <sub>6</sub>             |        |        |        |       |
|                                                                     |                                                                     | Product                                               | 0.2857                                           | 2.95   | 794.51 | 268.94 | 76.84 |
|                                                                     |                                                                     |                                                       | Li <sub>6</sub> DyHoCl <sub>12</sub>             |        |        |        |       |
| 0.102 Mn(Ni <sub>3</sub> O <sub>4</sub> ) <sub>2</sub>              |                                                                     |                                                       | 5.99                                             | 535.09 | 89.36  | 9.11   |       |
| 0.1429                                                              |                                                                     |                                                       | 4.40                                             | 569.36 | 129.50 | 18.51  |       |
| Li <sub>4</sub> MnCo <sub>5</sub> O <sub>12</sub>                   |                                                                     |                                                       |                                                  |        |        |        |       |
| 0.102                                                               |                                                                     |                                                       | 8.03                                             | 539.49 | 67.21  | 6.86   |       |
| Ho <sub>2</sub> MnNiO <sub>6</sub>                                  |                                                                     |                                                       |                                                  |        |        |        |       |
| 0.04082                                                             |                                                                     |                                                       | 7.32                                             | 551.73 | 75.38  | 3.08   |       |
| Ho <sub>2</sub> Mn <sub>2</sub> O <sub>7</sub>                      |                                                                     |                                                       |                                                  |        |        |        |       |
| 0.1429 DyMn <sub>2</sub> O <sub>5</sub>                             | 6.42                                                                | 352.37                                                | 54.92                                            | 7.85   |        |        |       |
| 0.1429 DyClO                                                        | 5.93                                                                | 213.95                                                | 36.09                                            | 5.16   |        |        |       |
| 3.286 LiCl                                                          | 1.66                                                                | 42.39                                                 | 25.54                                            | 83.91  |        |        |       |
| Li <sub>3</sub> Tm <sub>0.5</sub> Y <sub>0.5</sub> Cl <sub>6</sub>  | Reactant                                                            | 0.2857                                                | 2.69                                             | 724.92 | 268.94 | 76.84  |       |
|                                                                     |                                                                     | Li <sub>6</sub> YTmCl <sub>12</sub>                   |                                                  |        |        |        |       |
|                                                                     | Product                                                             | 0.7143                                                | 4.44                                             | 289.38 | 65.11  | 46.51  |       |
|                                                                     |                                                                     | Li <sub>3</sub> MnCoNiO <sub>6</sub>                  |                                                  |        |        |        |       |
|                                                                     |                                                                     | 0.1429                                                | 7.57                                             | 559.74 | 73.89  | 10.56  |       |
|                                                                     |                                                                     | Tm <sub>2</sub> Mn <sub>2</sub> O <sub>7</sub>        |                                                  |        |        |        |       |
|                                                                     |                                                                     | 0.1429                                                | 4.40                                             | 569.36 | 129.50 | 18.39  |       |
|                                                                     |                                                                     | Li <sub>4</sub> MnCo <sub>5</sub> O <sub>12</sub>     |                                                  |        |        |        |       |
|                                                                     |                                                                     | 0.7143 NiO                                            | 6.62                                             | 74.69  | 11.29  | 8.06   |       |
|                                                                     |                                                                     | 0.1429 YMn <sub>2</sub> O <sub>5</sub>                | 5.06                                             | 278.78 | 55.11  | 7.82   |       |
| 0.1429 YClO                                                         | 3.83                                                                | 140.36                                                | 36.62                                            | 5.23   |        |        |       |
| 3.286 LiCl                                                          | 1.66                                                                | 42.39                                                 | 25.54                                            | 83.91  |        |        |       |
| Li <sub>3</sub> Lu <sub>0.5</sub> Tb <sub>0.5</sub> Cl <sub>6</sub> | Reactant                                                            | 0.7317                                                | 4.44                                             | 289.38 | 65.11  | 47.64  |       |
|                                                                     |                                                                     | Li <sub>3</sub> MnCoNiO <sub>6</sub>                  |                                                  |        |        |        |       |
|                                                                     | Product                                                             | 0.2683                                                | 2.97                                             | 800.97 | 268.94 | 72.16  |       |
|                                                                     |                                                                     | Li <sub>6</sub> TbLuCl <sub>12</sub>                  |                                                  |        |        |        |       |
|                                                                     |                                                                     | 0.06098                                               | 7.77                                             | 527.48 | 67.89  | 4.13   |       |
|                                                                     |                                                                     | Tb <sub>2</sub> MnNiO <sub>6</sub>                    |                                                  |        |        |        |       |
|                                                                     |                                                                     | 0.1463                                                | 4.40                                             | 569.36 | 129.50 | 18.95  |       |
|                                                                     |                                                                     | Li <sub>4</sub> MnCo <sub>5</sub> O <sub>12</sub>     |                                                  |        |        |        |       |
|                                                                     |                                                                     | 0.1463 TbMn <sub>2</sub> O <sub>5</sub>               | 6.30                                             | 348.80 | 55.34  | 8.10   |       |
|                                                                     |                                                                     | 0.1159 Lu <sub>2</sub> Mn <sub>2</sub> O <sub>7</sub> | 7.83                                             | 571.81 | 73.03  | 8.46   |       |
| 0.6707 NiO                                                          | 6.62                                                                | 74.69                                                 | 11.29                                            | 7.57   |        |        |       |
| 3.22 LiCl                                                           | 1.66                                                                | 42.39                                                 | 25.54                                            | 82.23  |        |        |       |
| 0.01829 Lu <sub>2</sub> O <sub>3</sub>                              | 9.50                                                                | 397.93                                                | 41.91                                            | 0.76   |        |        |       |

|                                                                     |          |                                                       |        |        |        |       |      |        |        |       |
|---------------------------------------------------------------------|----------|-------------------------------------------------------|--------|--------|--------|-------|------|--------|--------|-------|
| Li <sub>3</sub> Lu <sub>0.5</sub> Y <sub>0.5</sub> Cl <sub>6</sub>  | Reactant | 0.7143                                                | 4.44   | 289.38 | 65.11  | 46.51 |      |        |        |       |
|                                                                     |          | Li <sub>3</sub> MnCoNiO <sub>6</sub>                  |        |        |        |       |      |        |        |       |
|                                                                     | Product  | 0.2857                                                | 7.83   | 571.81 | 73.03  | 10.44 |      |        |        |       |
|                                                                     |          | Li <sub>6</sub> YLuCl <sub>12</sub>                   |        |        |        |       |      |        |        |       |
|                                                                     |          | 0.1429 Lu <sub>2</sub> Mn <sub>2</sub> O <sub>7</sub> |        |        |        |       |      |        |        |       |
|                                                                     |          | 0.1429 YMn <sub>2</sub> O <sub>5</sub>                |        |        |        |       |      |        |        |       |
|                                                                     |          | 0.1429                                                |        |        |        |       | 4.40 | 569.36 | 129.50 | 18.51 |
|                                                                     |          | Li <sub>4</sub> MnCo <sub>5</sub> O <sub>12</sub>     |        |        |        |       |      |        |        |       |
|                                                                     |          | 0.1429 YClO                                           |        |        |        |       | 3.83 | 140.36 | 36.62  | 5.23  |
|                                                                     |          | 0.7143 NiO                                            |        |        |        |       | 6.62 | 74.69  | 11.29  | 8.06  |
| 3.286 LiCl                                                          | 1.66     | 42.39                                                 | 25.54  | 83.91  |        |       |      |        |        |       |
| Li <sub>3</sub> Sc <sub>0.5</sub> Tb <sub>0.5</sub> Cl <sub>6</sub> | Reactant | 0.7427                                                | 4.44   | 289.38 | 65.11  | 48.36 |      |        |        |       |
|                                                                     |          | Li <sub>3</sub> MnCoNiO <sub>6</sub>                  |        |        |        |       |      |        |        |       |
|                                                                     | Product  | 0.2573                                                | 4.27   | 365.38 | 85.58  | 3.86  |      |        |        |       |
|                                                                     |          | Li <sub>6</sub> TbScCl <sub>12</sub>                  |        |        |        |       |      |        |        |       |
|                                                                     |          | 0.04518                                               |        |        |        |       |      |        |        |       |
|                                                                     |          | Li <sub>2</sub> Mn <sub>3</sub> NiO <sub>8</sub>      |        |        |        |       |      |        |        |       |
|                                                                     |          | 0.1072                                                |        |        |        |       | 5.99 | 535.09 | 89.36  | 9.58  |
|                                                                     |          | Mn(Ni <sub>3</sub> O <sub>4</sub> ) <sub>2</sub>      |        |        |        |       |      |        |        |       |
|                                                                     |          | 0.1485 TbMn <sub>2</sub> O <sub>5</sub>               |        |        |        |       | 6.30 | 348.80 | 55.34  | 8.22  |
|                                                                     |          | 0.05436                                               |        |        |        |       | 7.77 | 527.48 | 67.89  | 3.69  |
| Tb <sub>2</sub> MnNiO <sub>6</sub>                                  |          |                                                       |        |        |        |       |      |        |        |       |
| 0.1485                                                              | 4.40     | 569.36                                                | 129.50 | 19.23  |        |       |      |        |        |       |
| 0.1286 Sc <sub>2</sub> O <sub>3</sub>                               | 3.75     | 137.91                                                | 36.77  | 4.73   |        |       |      |        |        |       |
| 3.087 LiCl                                                          | 1.66     | 42.39                                                 | 25.54  | 78.83  |        |       |      |        |        |       |
| Li <sub>3</sub> Sc <sub>0.5</sub> Y <sub>0.5</sub> Cl <sub>6</sub>  | Reactant | 0.7315                                                | 4.44   | 289.38 | 65.11  | 47.63 |      |        |        |       |
|                                                                     |          | Li <sub>3</sub> MnCoNiO <sub>6</sub>                  |        |        |        |       |      |        |        |       |
|                                                                     | Product  | 0.2685                                                | 2.35   | 600.94 | 255.30 | 68.55 |      |        |        |       |
|                                                                     |          | Li <sub>6</sub> YScCl <sub>12</sub>                   |        |        |        |       |      |        |        |       |
|                                                                     |          | 0.7427                                                |        |        |        |       | 4.44 | 289.38 | 65.11  | 48.36 |
|                                                                     |          | Li <sub>3</sub> MnCoNiO <sub>6</sub>                  |        |        |        |       |      |        |        |       |
|                                                                     |          | 0.1463                                                |        |        |        |       | 4.40 | 569.36 | 129.50 | 18.95 |
|                                                                     |          | Li <sub>4</sub> MnCo <sub>5</sub> O <sub>12</sub>     |        |        |        |       |      |        |        |       |
|                                                                     |          | 0.1119                                                |        |        |        |       | 5.99 | 535.09 | 89.36  | 10.00 |
|                                                                     |          | Mn(Ni <sub>3</sub> O <sub>4</sub> ) <sub>2</sub>      |        |        |        |       |      |        |        |       |
| 0.1463 YMn <sub>2</sub> O <sub>5</sub>                              | 5.06     | 278.78                                                | 55.11  | 8.06   |        |       |      |        |        |       |
| 0.06024                                                             | 4.27     | 365.38                                                | 85.58  | 5.13   |        |       |      |        |        |       |
| Li <sub>2</sub> Mn <sub>3</sub> NiO <sub>8</sub>                    |          |                                                       |        |        |        |       |      |        |        |       |
| 0.1343 Sc <sub>2</sub> O <sub>3</sub>                               | 3.75     | 137.91                                                | 36.77  | 4.94   |        |       |      |        |        |       |
| 0.1222 YClO                                                         | 3.83     | 140.36                                                | 36.62  | 4.48   |        |       |      |        |        |       |
| 3.1 LiCl                                                            | 1.66     | 42.39                                                 | 25.54  | 79.16  |        |       |      |        |        |       |
| Li <sub>3</sub> Lu <sub>0.5</sub> Ho <sub>0.5</sub> Cl <sub>6</sub> | Reactant | 0.2683                                                | 3.02   | 806.98 | 267.61 | 71.80 |      |        |        |       |
|                                                                     |          | Li <sub>6</sub> HoLuCl <sub>12</sub>                  |        |        |        |       |      |        |        |       |
|                                                                     | Product  | 0.7317                                                | 4.44   | 289.38 | 65.11  | 47.64 |      |        |        |       |
|                                                                     |          | Li <sub>3</sub> MnCoNiO <sub>6</sub>                  |        |        |        |       |      |        |        |       |
|                                                                     |          | 0.122 HoMn <sub>2</sub> O <sub>5</sub>                |        |        |        |       | 6.50 | 354.80 | 54.55  | 6.65  |
|                                                                     |          | 0.122 Lu <sub>2</sub> Mn <sub>2</sub> O <sub>7</sub>  |        |        |        |       | 7.83 | 571.81 | 73.03  | 8.91  |
|                                                                     |          | 0.07317                                               |        |        |        |       | 8.03 | 539.49 | 67.21  | 4.91  |
|                                                                     |          | Ho <sub>2</sub> MnNiO <sub>6</sub>                    |        |        |        |       |      |        |        |       |
|                                                                     |          | 0.1463                                                |        |        |        |       | 4.40 | 569.36 | 129.50 | 18.95 |
|                                                                     |          | Li <sub>4</sub> MnCo <sub>5</sub> O <sub>12</sub>     |        |        |        |       |      |        |        |       |
| 0.02439 LuMnO <sub>3</sub>                                          | 7.50     | 277.90                                                | 37.05  | 0.90   |        |       |      |        |        |       |
| 0.6585 NiO                                                          | 6.62     | 74.69                                                 | 11.29  | 7.43   |        |       |      |        |        |       |

|     |                                                                     |          |                                                             |      |        |        |       |
|-----|---------------------------------------------------------------------|----------|-------------------------------------------------------------|------|--------|--------|-------|
|     |                                                                     |          | 3.22 LiCl                                                   | 1.66 | 42.39  | 25.54  | 82.23 |
|     |                                                                     | Reactant | 0.7317<br>Li <sub>3</sub> MnCoNiO <sub>6</sub>              | 4.44 | 289.38 | 65.11  | 47.64 |
|     |                                                                     |          | 0.2683<br>Li <sub>6</sub> ErLuCl <sub>12</sub>              | 3.01 | 809.31 | 268.94 | 72.08 |
|     |                                                                     | Product  | 0.08537<br>Lu <sub>2</sub> Mn <sub>2</sub> O <sub>7</sub>   | 7.83 | 571.81 | 73.03  | 6.23  |
|     | Li <sub>3</sub> Lu <sub>0.5</sub> Er <sub>0.5</sub> Cl <sub>6</sub> |          | 0.1463<br>Li <sub>4</sub> MnCo <sub>5</sub> O <sub>12</sub> | 4.40 | 569.36 | 129.50 | 18.95 |
|     |                                                                     |          | 0.04878 ErMn <sub>2</sub> O <sub>5</sub>                    | 6.59 | 357.13 | 54.16  | 2.64  |
|     |                                                                     |          | 0.1098 Er <sub>2</sub> Mn <sub>2</sub> O <sub>7</sub>       | 7.43 | 556.39 | 74.87  | 8.16  |
|     |                                                                     |          | 0.7317 NiO                                                  | 6.62 | 74.69  | 11.29  | 8.26  |
|     |                                                                     |          | 0.09756 LuMnO <sub>3</sub>                                  | 7.50 | 277.90 | 37.05  | 3.61  |
|     |                                                                     |          | 3.22 LiCl                                                   | 1.66 | 42.39  | 25.54  | 82.23 |
|     |                                                                     | Reactant | 0.7186<br>Li <sub>3</sub> MnCoNiO <sub>6</sub>              | 4.44 | 289.38 | 65.11  | 46.79 |
|     |                                                                     |          | 0.2814<br>Li <sub>6</sub> TmLuCl <sub>12</sub>              | 3.00 | 810.98 | 270.27 | 76.06 |
|     |                                                                     | Product  | 0.1198<br>Mn(Ni <sub>3</sub> O <sub>4</sub> ) <sub>2</sub>  | 5.99 | 535.09 | 89.36  | 10.71 |
|     | Li <sub>3</sub> Lu <sub>0.5</sub> Tm <sub>0.5</sub> Cl <sub>6</sub> |          | 0.1437<br>Li <sub>4</sub> MnCo <sub>5</sub> O <sub>12</sub> | 4.40 | 569.36 | 129.50 | 18.52 |
|     |                                                                     |          | 0.1437 LuMnO <sub>3</sub>                                   | 7.50 | 277.90 | 37.05  | 5.32  |
|     |                                                                     |          | 0.06886<br>Lu <sub>2</sub> Mn <sub>2</sub> O <sub>7</sub>   | 7.83 | 571.81 | 73.03  | 4.97  |
|     |                                                                     |          | 0.1078 TmClO                                                | 6.35 | 220.39 | 34.70  | 3.74  |
|     |                                                                     |          | 0.08683<br>Tm <sub>2</sub> Mn <sub>2</sub> O <sub>7</sub>   | 7.57 | 559.74 | 73.89  | 6.41  |
|     |                                                                     |          | 3.269 LiCl                                                  | 1.66 | 42.39  | 25.54  | 83.48 |
|     |                                                                     | Reactant | 0.1429<br>Li <sub>6</sub> TbHoCl <sub>12</sub>              | 2.94 | 790.94 | 268.94 | 38.43 |
|     |                                                                     |          | 0.8571 LiNiO <sub>2</sub>                                   | 4.68 | 97.63  | 20.85  | 17.87 |
|     | Li <sub>3</sub> Ho <sub>0.5</sub> Tb <sub>0.5</sub> Cl <sub>6</sub> | Product  | 0.1071 LiClO <sub>4</sub>                                   | 2.34 | 106.39 | 45.51  | 4.87  |
|     |                                                                     |          | 0.07143 Tb <sub>2</sub> O <sub>3</sub>                      | 7.84 | 365.85 | 46.68  | 3.33  |
|     |                                                                     |          | 0.8571 NiO                                                  | 6.62 | 74.69  | 11.29  | 9.67  |
|     |                                                                     |          | 1.607 LiCl                                                  | 1.66 | 42.39  | 25.54  | 41.04 |
|     |                                                                     |          | 0.07143 Ho <sub>2</sub> O <sub>3</sub>                      | 8.40 | 377.86 | 44.96  | 3.21  |
|     |                                                                     | Reactant | 0.1667<br>Li <sub>6</sub> DyHoCl <sub>12</sub>              | 2.95 | 794.51 | 268.94 | 44.83 |
|     |                                                                     |          | 0.8333 LiNiO <sub>2</sub>                                   | 4.68 | 97.63  | 20.85  | 17.37 |
| LNO | Li <sub>3</sub> Ho <sub>0.5</sub> Dy <sub>0.5</sub> Cl <sub>6</sub> | Product  | 0.1042 LiClO <sub>4</sub>                                   | 2.34 | 106.39 | 45.51  | 4.74  |
|     |                                                                     |          | 0.8333 NiO                                                  | 6.62 | 74.69  | 11.29  | 9.41  |
|     |                                                                     |          | 1.729 LiCl                                                  | 1.66 | 42.39  | 25.54  | 44.15 |
|     |                                                                     |          | 0.1667 DyClO                                                | 5.93 | 213.95 | 36.09  | 5.99  |
|     |                                                                     |          | 0.08333 Ho <sub>2</sub> O <sub>3</sub>                      | 8.40 | 377.86 | 44.96  | 3.75  |
|     |                                                                     | Reactant | 0.1667<br>Li <sub>6</sub> YTmCl <sub>12</sub>               | 2.69 | 724.92 | 268.94 | 44.83 |
|     |                                                                     |          | 0.8333 LiNiO <sub>2</sub>                                   | 4.68 | 97.63  | 20.85  | 17.37 |
|     | Li <sub>3</sub> Tm <sub>0.5</sub> Y <sub>0.5</sub> Cl <sub>6</sub>  | Product  | 0.1667 YClO                                                 | 3.83 | 140.36 | 36.62  | 6.10  |
|     |                                                                     |          | 0.1042 LiClO <sub>4</sub>                                   | 2.34 | 106.39 | 45.51  | 4.74  |
|     |                                                                     |          | 0.8333 NiO                                                  | 6.62 | 74.69  | 11.29  | 9.41  |
|     |                                                                     |          | 0.08333 Tm <sub>2</sub> O <sub>3</sub>                      | 8.92 | 385.87 | 43.26  | 3.59  |

|                                                                     |          |                                                |      |        |        |       |
|---------------------------------------------------------------------|----------|------------------------------------------------|------|--------|--------|-------|
|                                                                     |          | 1.729 LiCl                                     | 1.66 | 42.39  | 25.54  | 44.15 |
|                                                                     | Reactant | 0.1429<br>Li <sub>6</sub> TbLuCl <sub>12</sub> | 2.99 | 800.97 | 268.94 | 38.43 |
|                                                                     | Product  | 0.8571 LiNiO <sub>2</sub>                      | 4.68 | 97.63  | 20.85  | 17.87 |
| Li <sub>3</sub> Lu <sub>0.5</sub> Tb <sub>0.5</sub> Cl <sub>6</sub> |          | 0.1071 LiClO <sub>4</sub>                      | 2.34 | 106.39 | 45.51  | 4.87  |
|                                                                     |          | 0.07143 Tb <sub>2</sub> O <sub>3</sub>         | 7.84 | 365.85 | 46.68  | 3.33  |
|                                                                     |          | 0.8571 NiO                                     | 6.62 | 74.69  | 11.29  | 9.67  |
|                                                                     |          | 1.607 LiCl                                     | 1.66 | 42.39  | 25.54  | 41.04 |
|                                                                     | Reactant | 0.07143 Lu <sub>2</sub> O <sub>3</sub>         | 9.50 | 397.93 | 41.91  | 2.99  |
|                                                                     |          | 0.8333 LiNiO <sub>2</sub>                      | 4.68 | 97.63  | 20.85  | 17.37 |
|                                                                     | Product  | 0.1667<br>Li <sub>6</sub> YLuCl <sub>12</sub>  | 2.72 | 670.96 | 246.87 | 40.98 |
| Li <sub>3</sub> Lu <sub>0.5</sub> Y <sub>0.5</sub> Cl <sub>6</sub>  |          | 0.1042 LiClO <sub>4</sub>                      | 2.34 | 106.39 | 45.51  | 4.74  |
|                                                                     |          | 0.1667 YClO                                    | 3.83 | 140.36 | 36.62  | 6.08  |
|                                                                     |          | 0.08333 Lu <sub>2</sub> O <sub>3</sub>         | 9.50 | 397.93 | 41.91  | 3.49  |
|                                                                     |          | 0.8333 NiO                                     | 6.62 | 74.69  | 11.29  | 9.40  |
|                                                                     |          | 1.729 LiCl                                     | 1.66 | 42.39  | 25.54  | 44.15 |
|                                                                     | Reactant | 0.1429<br>Li <sub>6</sub> TbScCl <sub>12</sub> | 2.63 | 670.96 | 255.30 | 36.48 |
| Li <sub>3</sub> Sc <sub>0.5</sub> Tb <sub>0.5</sub> Cl <sub>6</sub> | Product  | 0.8571 LiNiO <sub>2</sub>                      | 4.68 | 97.63  | 20.85  | 17.87 |
|                                                                     |          | 0.1071 LiClO <sub>4</sub>                      | 2.34 | 106.39 | 45.51  | 4.87  |
|                                                                     |          | 0.07143 Tb <sub>2</sub> O <sub>3</sub>         | 7.84 | 365.85 | 46.68  | 3.31  |
|                                                                     |          | 0.8571 NiO                                     | 6.62 | 74.69  | 11.29  | 9.67  |
|                                                                     |          | 1.607 LiCl                                     | 1.66 | 42.39  | 25.54  | 41.04 |
|                                                                     | Reactant | 0.07143 Sc <sub>2</sub> O <sub>3</sub>         | 3.75 | 137.91 | 36.77  | 2.61  |
|                                                                     | Product  | 0.1667<br>Li <sub>6</sub> YScCl <sub>12</sub>  | 2.36 | 600.94 | 255.30 | 42.56 |
| Li <sub>3</sub> Sc <sub>0.5</sub> Y <sub>0.5</sub> Cl <sub>6</sub>  |          | 0.8333 LiNiO <sub>2</sub>                      | 4.68 | 97.63  | 20.85  | 17.37 |
|                                                                     |          | 0.1667 YClO                                    | 3.83 | 140.36 | 36.62  | 6.10  |
|                                                                     |          | 0.1042 LiClO <sub>4</sub>                      | 2.34 | 106.39 | 45.51  | 4.74  |
|                                                                     |          | 0.8333 NiO                                     | 6.62 | 74.69  | 11.29  | 9.41  |
|                                                                     |          | 1.729 LiCl                                     | 1.66 | 42.39  | 25.54  | 44.15 |
|                                                                     | Reactant | 0.08333 Sc <sub>2</sub> O <sub>3</sub>         | 3.75 | 137.91 | 36.77  | 3.05  |
|                                                                     | Product  | 0.1429<br>Li <sub>6</sub> HoLuCl <sub>12</sub> | 3.02 | 806.98 | 267.61 | 38.24 |
| Li <sub>3</sub> Lu <sub>0.5</sub> Ho <sub>0.5</sub> Cl <sub>6</sub> |          | 0.8571 LiNiO <sub>2</sub>                      | 4.68 | 97.63  | 20.85  | 17.87 |
|                                                                     |          | 0.1071 LiClO <sub>4</sub>                      | 2.34 | 106.39 | 45.51  | 4.87  |
|                                                                     |          | 0.8571 NiO                                     | 6.62 | 74.69  | 11.29  | 9.67  |
|                                                                     |          | 0.07143 Ho <sub>2</sub> O <sub>3</sub>         | 8.40 | 377.86 | 44.96  | 3.21  |
|                                                                     |          | 1.607 LiCl                                     | 1.66 | 42.39  | 25.54  | 41.04 |
|                                                                     | Reactant | 0.07143 Lu <sub>2</sub> O <sub>3</sub>         | 9.50 | 397.93 | 41.91  | 2.99  |
|                                                                     | Product  | 0.1429<br>Li <sub>6</sub> ErLuCl <sub>12</sub> | 3.01 | 809.31 | 268.94 | 38.43 |
| Li <sub>3</sub> Lu <sub>0.5</sub> Er <sub>0.5</sub> Cl <sub>6</sub> |          | 0.8571 LiNiO <sub>2</sub>                      | 4.68 | 97.63  | 20.85  | 17.87 |
|                                                                     |          | 0.1071 LiClO <sub>4</sub>                      | 2.34 | 106.39 | 45.51  | 4.87  |
|                                                                     |          | 0.8571 NiO                                     | 6.62 | 74.69  | 11.29  | 9.67  |
|                                                                     |          | 0.07143 Er <sub>2</sub> O <sub>3</sub>         | 8.65 | 382.52 | 44.20  | 3.16  |
|                                                                     |          | 1.607 LiCl                                     | 1.66 | 42.39  | 25.54  | 41.04 |
|                                                                     | Reactant | 0.07143 Lu <sub>2</sub> O <sub>3</sub>         | 9.50 | 397.93 | 41.91  | 2.99  |

|                                                        |          |                                           |      |        |        |       |
|--------------------------------------------------------|----------|-------------------------------------------|------|--------|--------|-------|
| $\text{Li}_3\text{Lu}_{0.5}\text{Tm}_{0.5}\text{Cl}_6$ | Reactant | 0.1667<br>$\text{Li}_6\text{TmLuCl}_{12}$ | 3.00 | 810.98 | 270.27 | 45.05 |
|                                                        |          | 0.8333 $\text{LiNiO}_2$                   | 4.68 | 97.63  | 20.85  | 17.37 |
|                                                        | Product  | 0.1042 $\text{LiClO}_4$                   | 2.34 | 106.39 | 45.51  | 4.74  |
|                                                        |          | 0.8333 $\text{No}$                        | 6.62 | 74.69  | 11.29  | 9.41  |
|                                                        |          | 1.729 $\text{LiCl}$                       | 1.66 | 42.39  | 25.54  | 44.15 |
|                                                        |          | 0.1667 $\text{TmClO}$                     | 6.35 | 220.39 | 34.70  | 5.78  |
|                                                        |          | 0.08333 $\text{Lu}_2\text{O}_3$           | 9.50 | 397.93 | 41.91  | 3.49  |
|                                                        |          |                                           |      |        |        |       |

**Table S10.** Volume change percentile (%) of interface between solid electrolytes and cathode materials (LiFePO<sub>4</sub> (LFP), LiMn<sub>2</sub>O<sub>4</sub> (LMO), Li(NiMnCo)<sub>1/3</sub>O<sub>2</sub> (NCM), and LiCoO<sub>2</sub> (LCO)).

| Solid electrolyte                                                   | LFP   | LCO    | LMO    | NMC111 | LNO    |
|---------------------------------------------------------------------|-------|--------|--------|--------|--------|
| Li <sub>3</sub> Ho <sub>0.5</sub> Tb <sub>0.5</sub> Cl <sub>6</sub> | -6.67 | -8.12  | -5.76  | -8.99  | -10.35 |
| Li <sub>3</sub> Ho <sub>0.5</sub> Dy <sub>0.5</sub> Cl <sub>6</sub> | -6.55 | -8.45  | -5.60  | -9.02  | -9.39  |
| Li <sub>3</sub> Tm <sub>0.5</sub> Y <sub>0.5</sub> Cl <sub>6</sub>  | -6.37 | -9.64  | -5.49  | -8.63  | -9.32  |
| Li <sub>3</sub> Lu <sub>0.5</sub> Tb <sub>0.5</sub> Cl <sub>6</sub> | -6.24 | -11.86 | -5.47  | -8.69  | -9.97  |
| Li <sub>3</sub> Lu <sub>0.5</sub> Y <sub>0.5</sub> Cl <sub>6</sub>  | -6.19 | -10.70 | -10.46 | -8.66  | -16.31 |
| Li <sub>3</sub> Sc <sub>0.5</sub> Tb <sub>0.5</sub> Cl <sub>6</sub> | -8.91 | -13.19 | -8.19  | -12.35 | -13.17 |
| Li <sub>3</sub> Sc <sub>0.5</sub> Y <sub>0.5</sub> Cl <sub>6</sub>  | -8.86 | -13.19 | -8.15  | 4.39   | -12.57 |
| Li <sub>3</sub> Lu <sub>0.5</sub> Tm <sub>0.5</sub> Cl <sub>6</sub> | -6.33 | -9.55  | -5.58  | -8.82  | -10.12 |
| Li <sub>3</sub> Lu <sub>0.5</sub> Er <sub>0.5</sub> Cl <sub>6</sub> | -6.33 | -12.24 | -5.23  | -8.65  | -9.65  |
| Li <sub>3</sub> Lu <sub>0.5</sub> Ho <sub>0.5</sub> Cl <sub>6</sub> | -5.42 | -9.72  | -4.77  | -8.39  | -8.25  |

**Table S11.** Calculation results of ion conduction by BVPA method using SoftBV software.

| Temp.<br>(K)                 | Li <sub>3</sub> InCl <sub>6</sub> |                           | Li <sub>3</sub> LuCl <sub>6</sub> |                           | Li <sub>3</sub> Lu <sub>0.5</sub> Er <sub>0.5</sub> Cl <sub>6</sub> |                           | Li <sub>3</sub> Lu <sub>0.5</sub> Ho <sub>0.5</sub> Cl <sub>6</sub> |                           |
|------------------------------|-----------------------------------|---------------------------|-----------------------------------|---------------------------|---------------------------------------------------------------------|---------------------------|---------------------------------------------------------------------|---------------------------|
|                              | Conductivity<br>(S/cm)            | D<br>(cm <sup>2</sup> /s) | Conductivity<br>(S/cm)            | D<br>(cm <sup>2</sup> /s) | Conductivity<br>(S/cm)                                              | D<br>(cm <sup>2</sup> /s) | Conductivity<br>(S/cm)                                              | D<br>(cm <sup>2</sup> /s) |
| 700                          | 0.0044591<br>8                    | 1.25E-07                  | 0.00510138                        | 1.43E-07                  | 0.00518185                                                          | 1.45E-07                  | 0.00636089<br>2                                                     | 1.78E-07                  |
| 722                          | 0.0057722<br>1                    | 1.67E-07                  | 0.00657484                        | 1.90E-07                  | 0.00667517                                                          | 1.93E-07                  | 0.0081397                                                           | 2.35E-07                  |
| 745                          | 0.0074303                         | 2.22E-07                  | 0.00842737                        | 2.51E-07                  | 0.00855172                                                          | 2.55E-07                  | 0.01036005<br>6                                                     | 3.09E-07                  |
| 769                          | 0.0095058<br>9                    | 2.93E-07                  | 0.0107364                         | 3.31E-07                  | 0.0108895                                                           | 3.35E-07                  | 0.01310797<br>9                                                     | 4.04E-07                  |
| 795                          | 0.0121931<br>5                    | 3.88E-07                  | 0.01371302                        | 4.36E-07                  | 0.01390167                                                          | 4.42E-07                  | 0.01662532<br>1                                                     | 5.29E-07                  |
| 824                          | 0.0157798<br>2                    | 5.21E-07                  | 0.01766825                        | 5.83E-07                  | 0.01790206                                                          | 5.91E-07                  | 0.02126492<br>6                                                     | 7.01E-07                  |
| 854                          | 0.0202004<br>6                    | 6.91E-07                  | 0.02252145                        | 7.70E-07                  | 0.02280814                                                          | 7.80E-07                  | 0.02691626<br>2                                                     | 9.20E-07                  |
| 886                          | 0.0257721<br>8                    | 9.14E-07                  | 0.02861167                        | 1.01E-06                  | 0.02896155                                                          | 1.03E-06                  | 0.03395710<br>7                                                     | 1.20E-06                  |
| 921                          | 0.0329430<br>9                    | 1.21E-06                  | 0.03641536                        | 1.34E-06                  | 0.03684217                                                          | 1.36E-06                  | 0.04291355<br>1                                                     | 1.58E-06                  |
| 959                          | 0.0420685<br>8                    | 1.62E-06                  | 0.0463018                         | 1.78E-06                  | 0.04682088                                                          | 1.80E-06                  | 0.05417712<br>2                                                     | 2.08E-06                  |
| 1000                         | 0.0535392<br>4                    | 2.14E-06                  | 0.0586733                         | 2.35E-06                  | 0.0593013                                                           | 2.37E-06                  | 0.06816797<br>4                                                     | 2.73E-06                  |
| Migration<br>Barrier<br>(eV) | 0.572                             |                           | 0.565                             |                           | 0.564                                                               |                           | 0.551                                                               |                           |
